# Supplementary material for: Genetic inactivation of RIP1 kinase activity in rats protects against ischemic brain injury
Source: PubMed Central journal article supplement (PMC8026634; doi:10.1038/s41419-021-03651-6), 2021-04-07

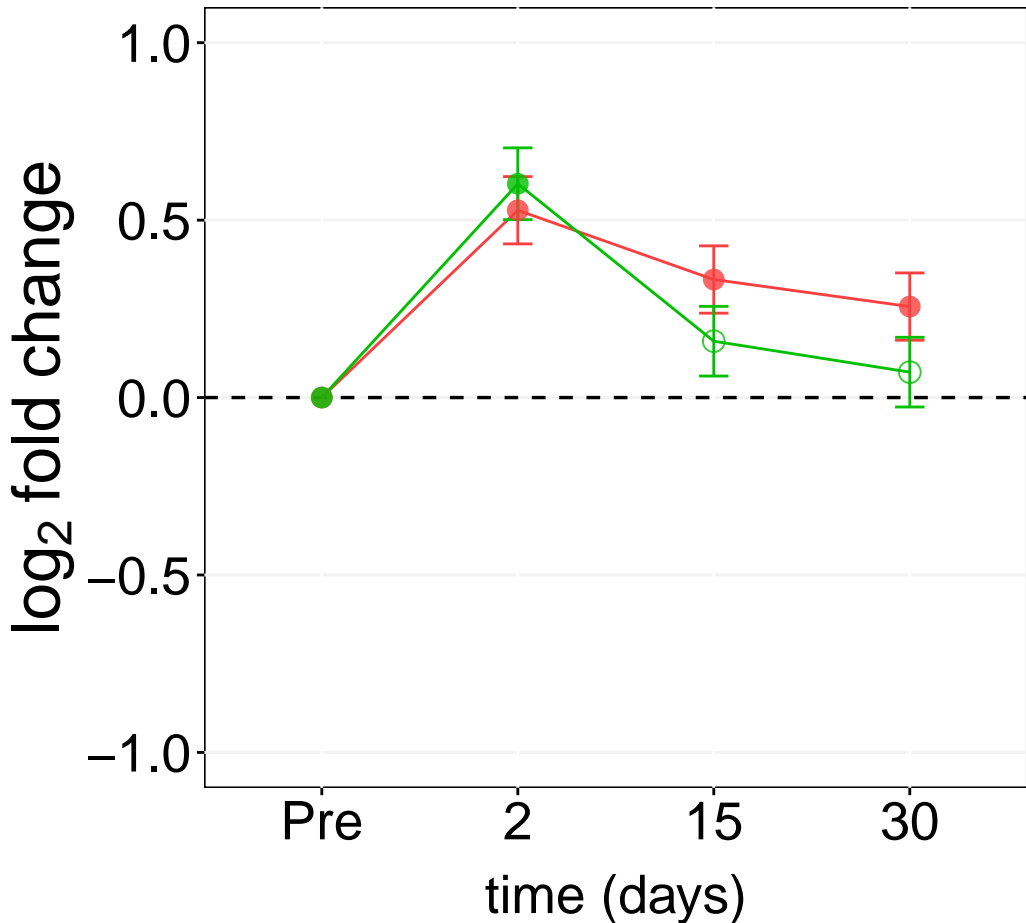

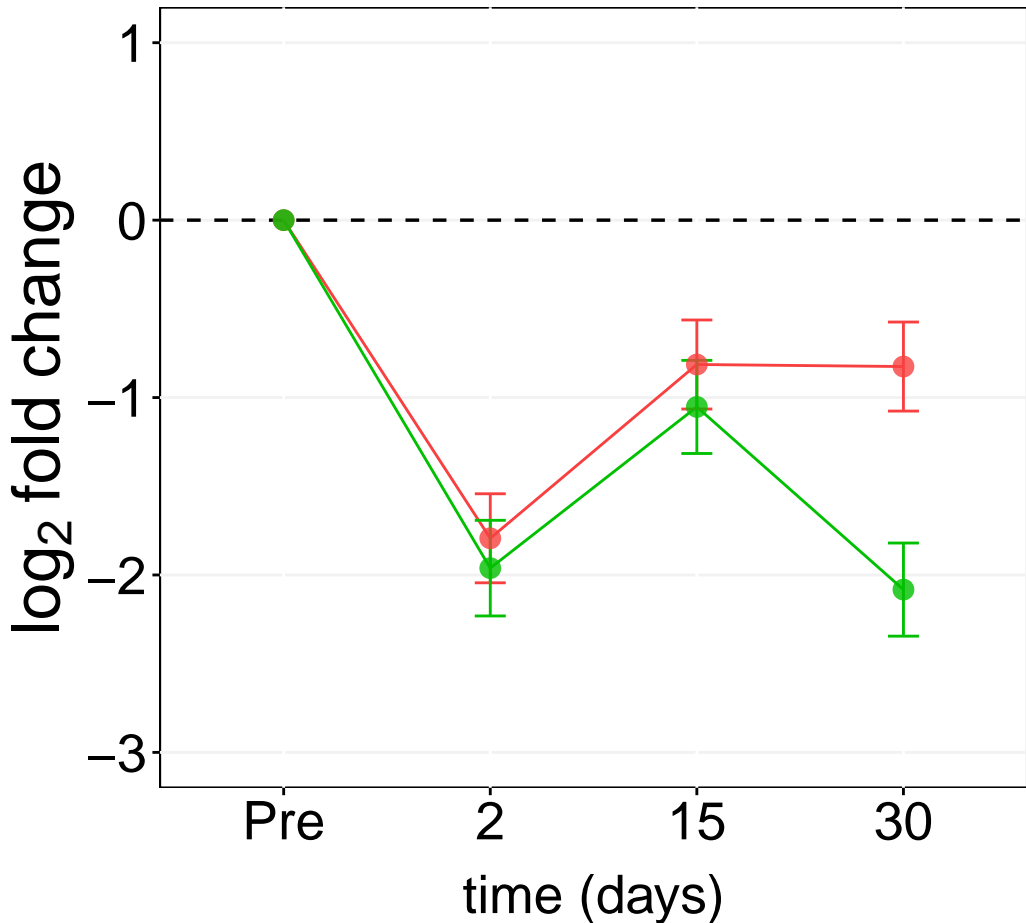

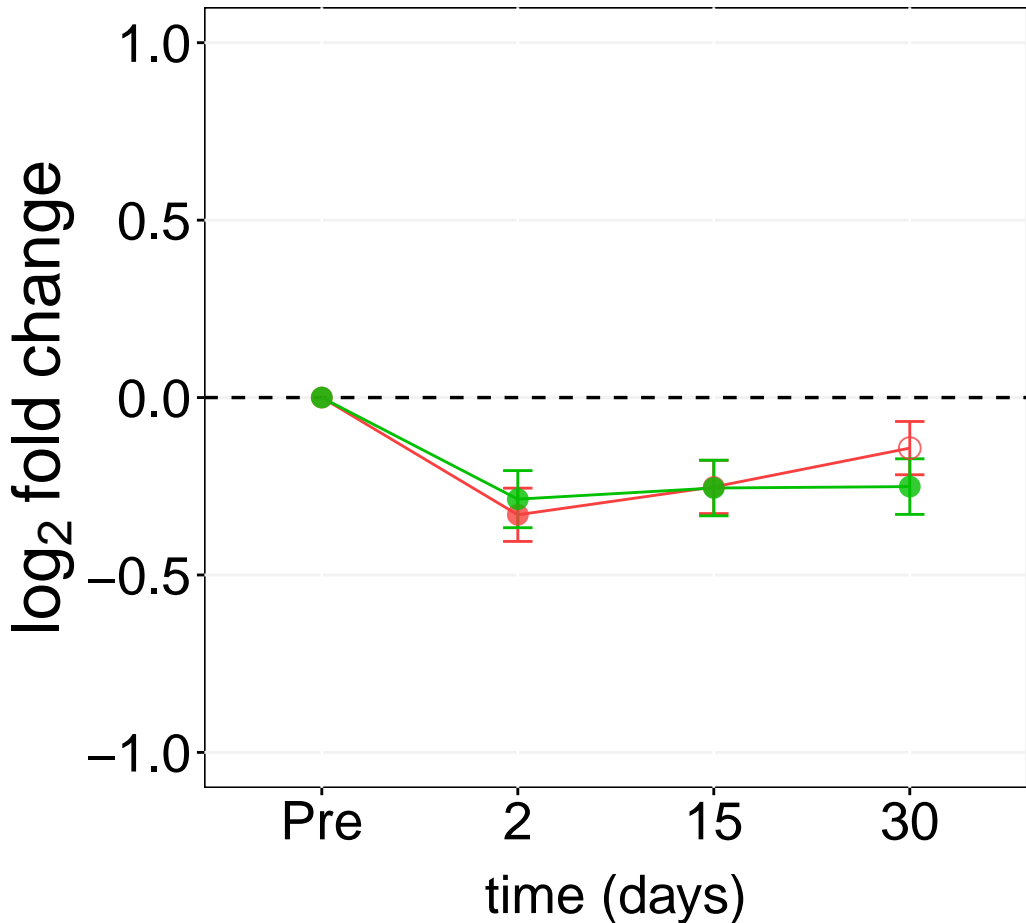

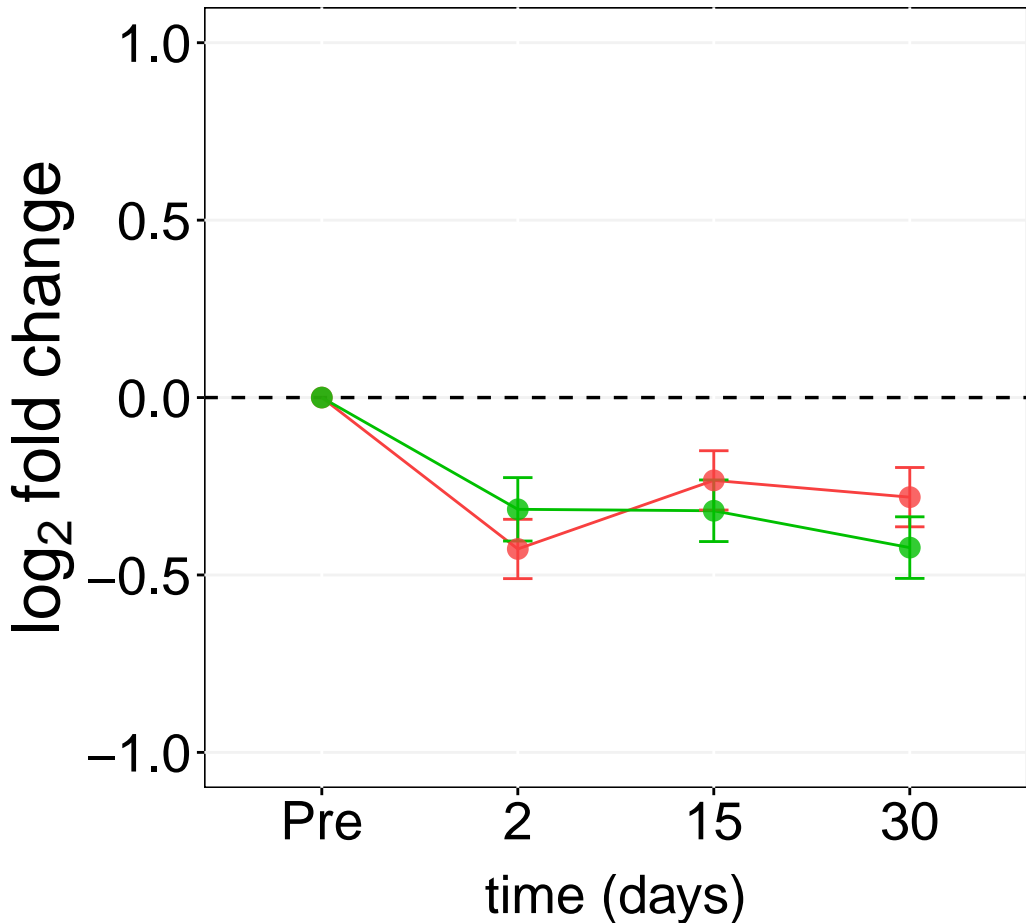

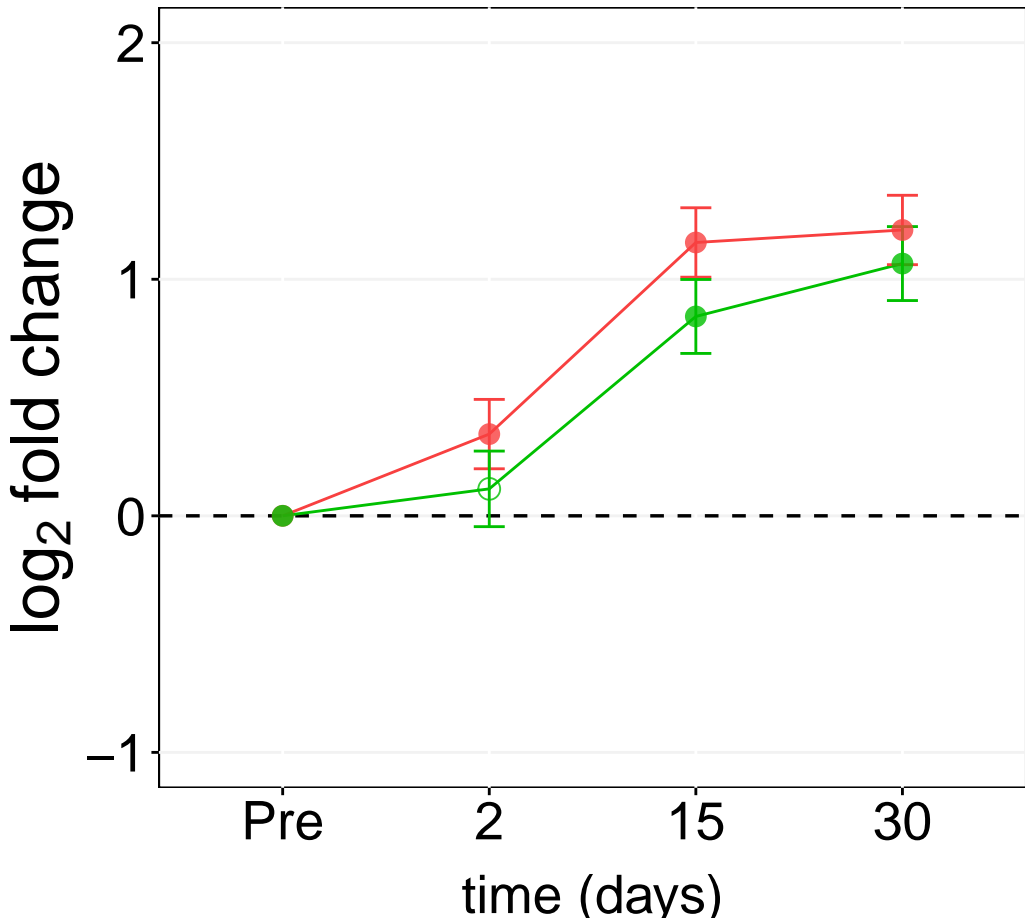

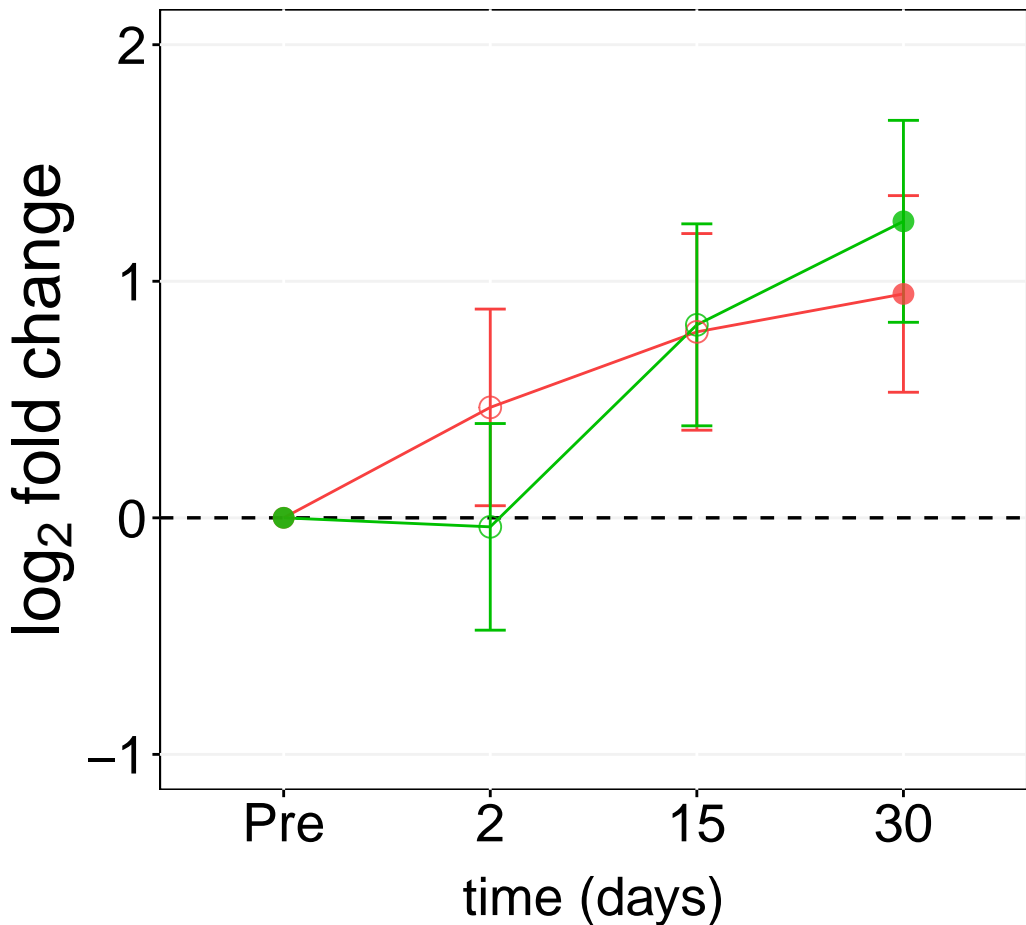

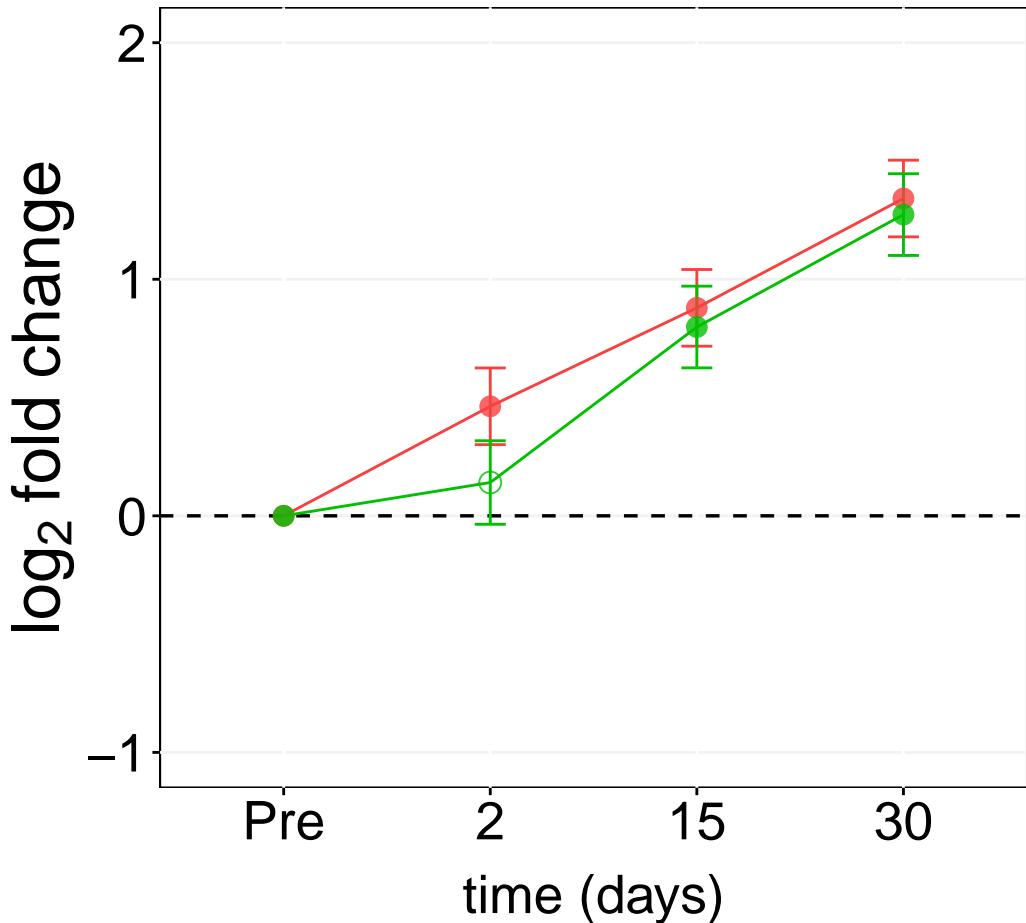

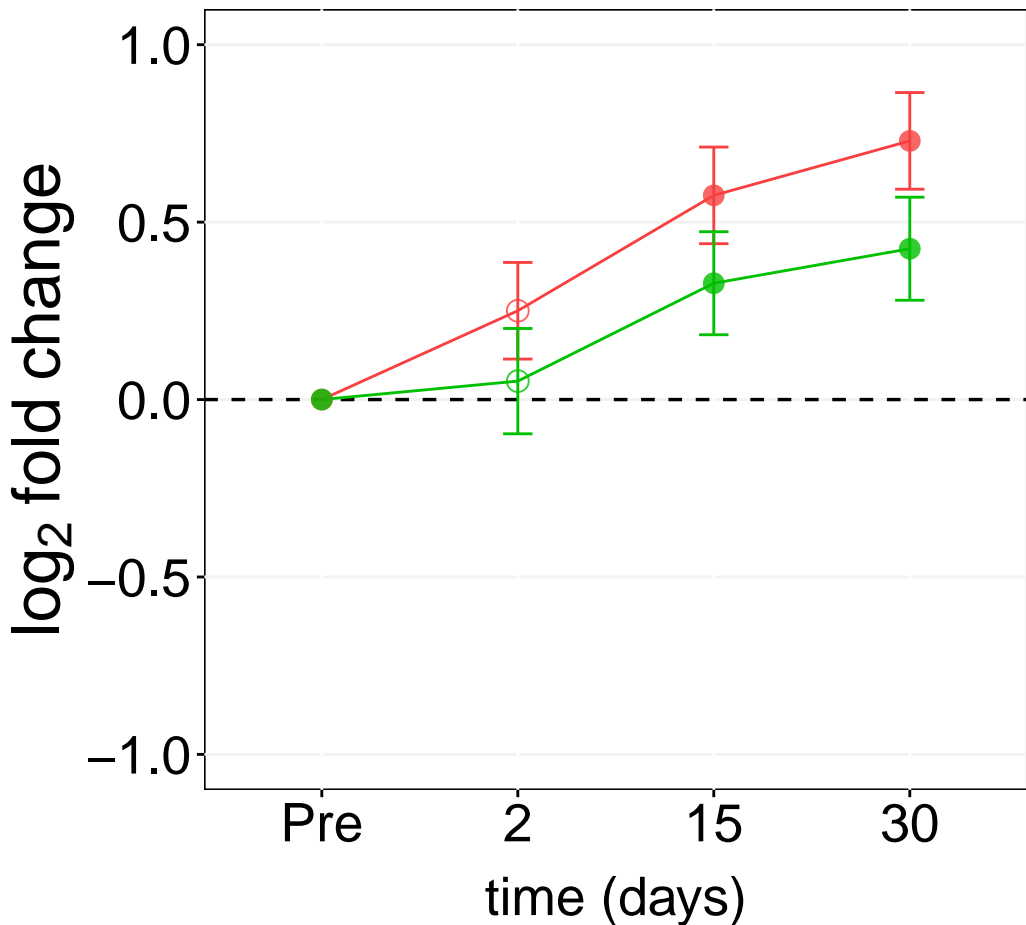



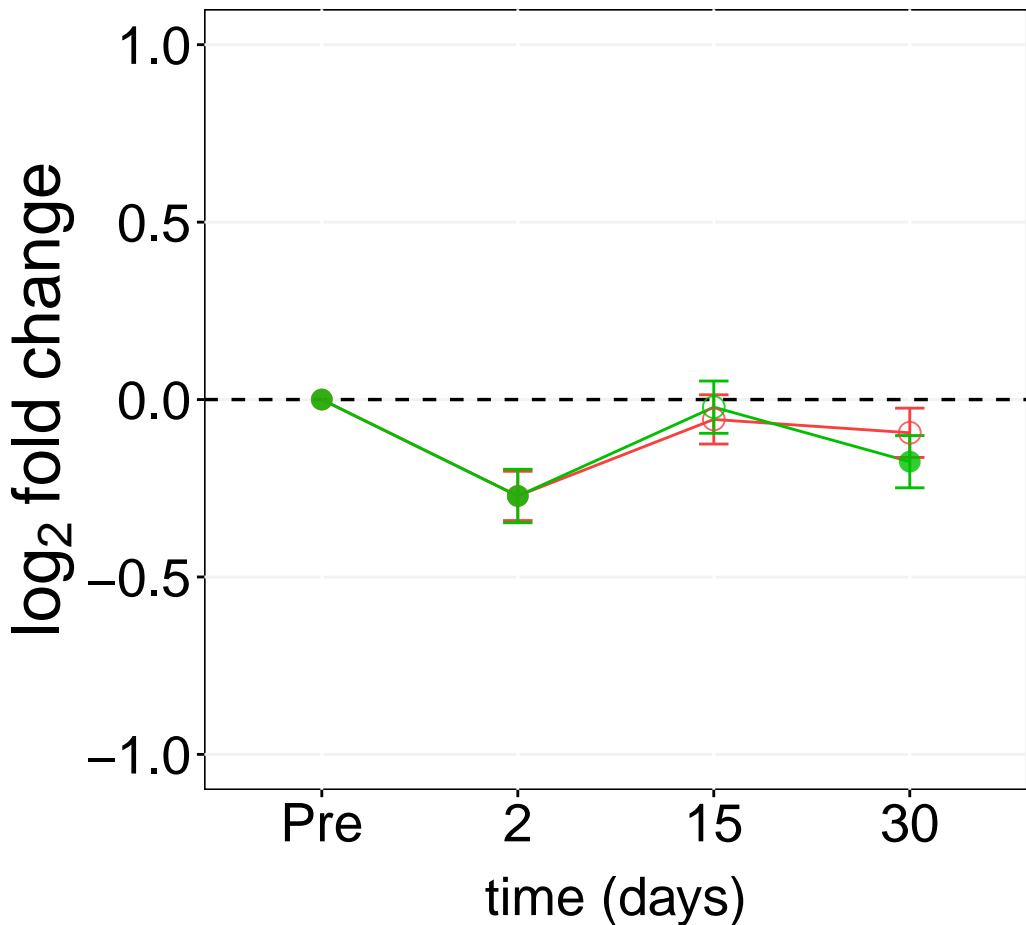

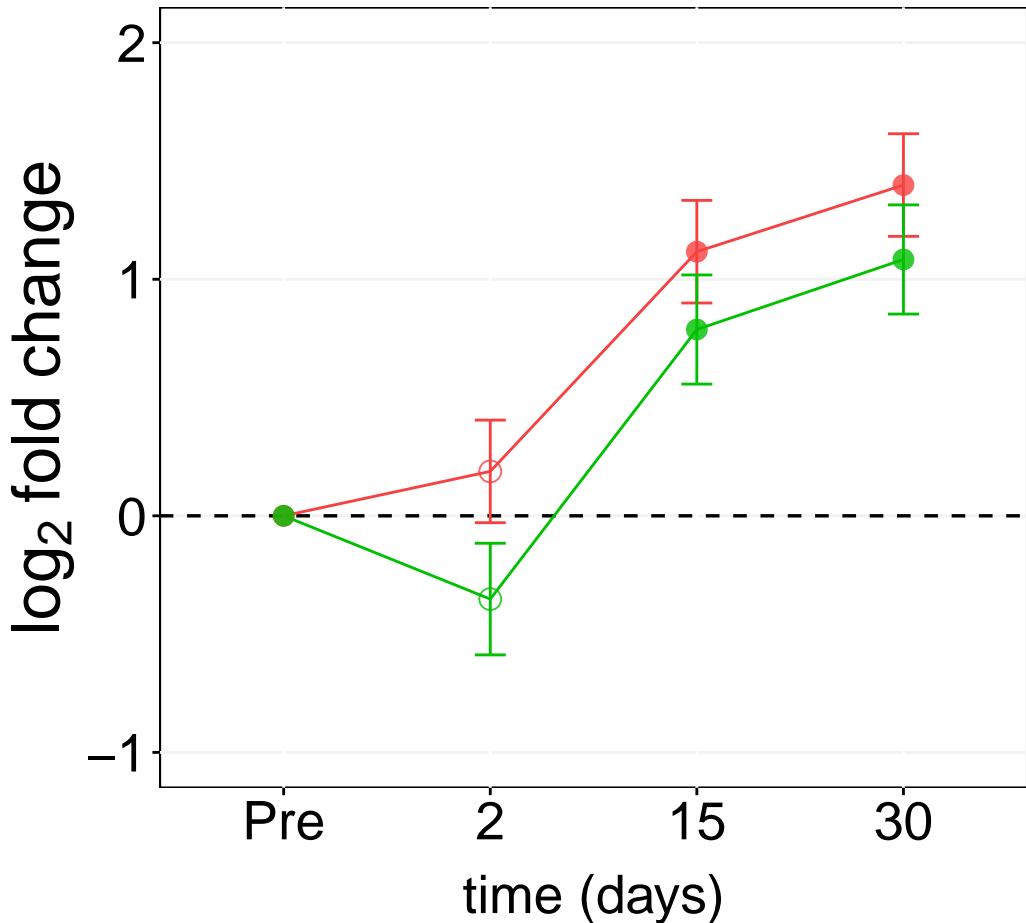

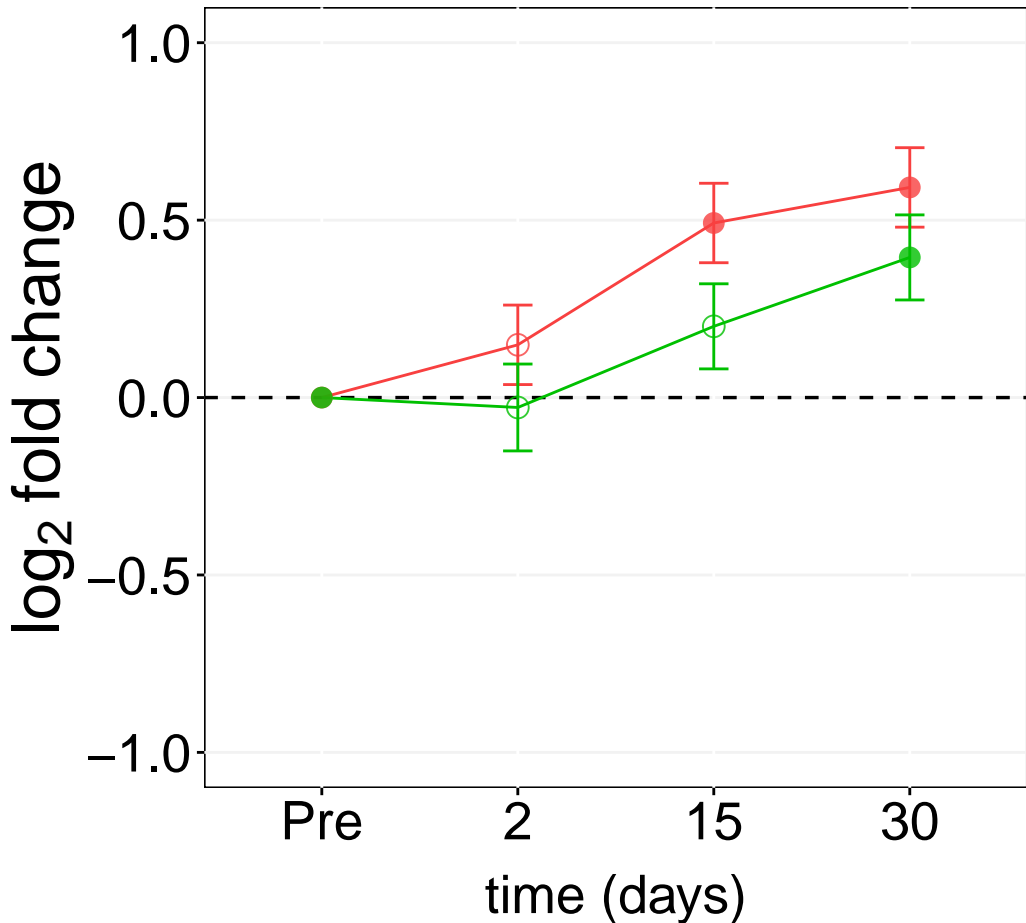

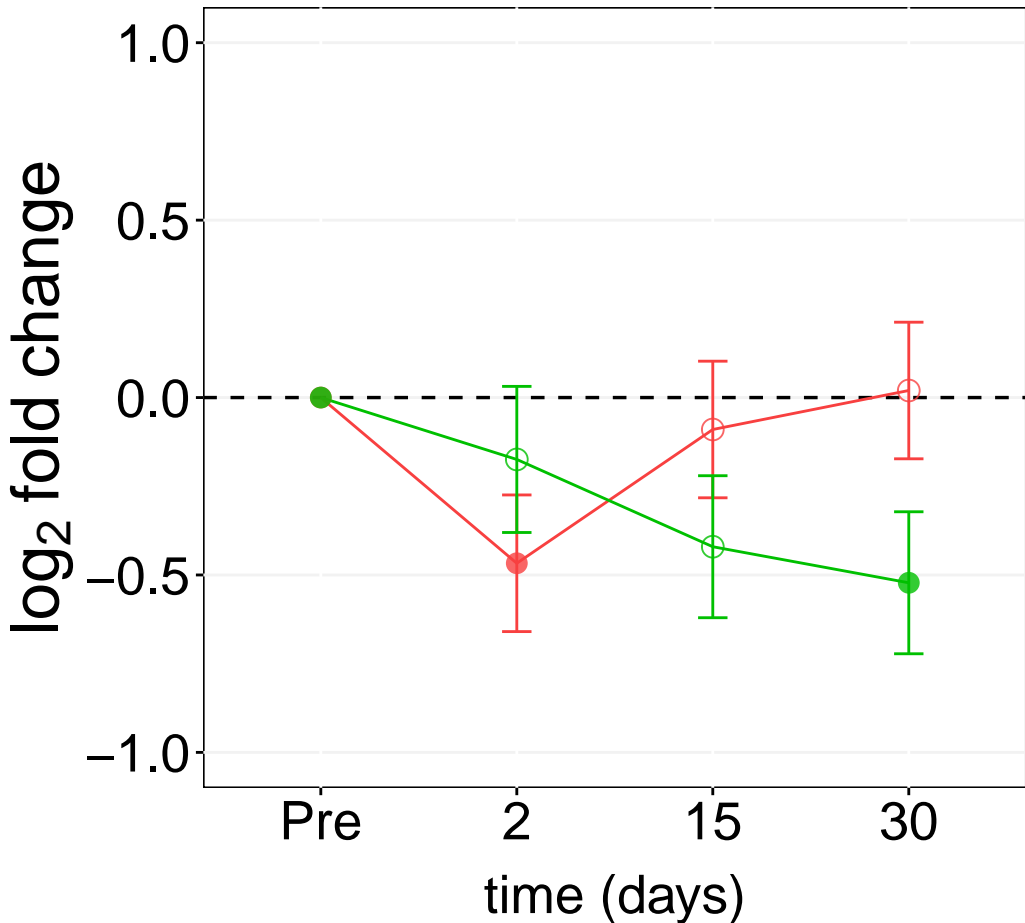

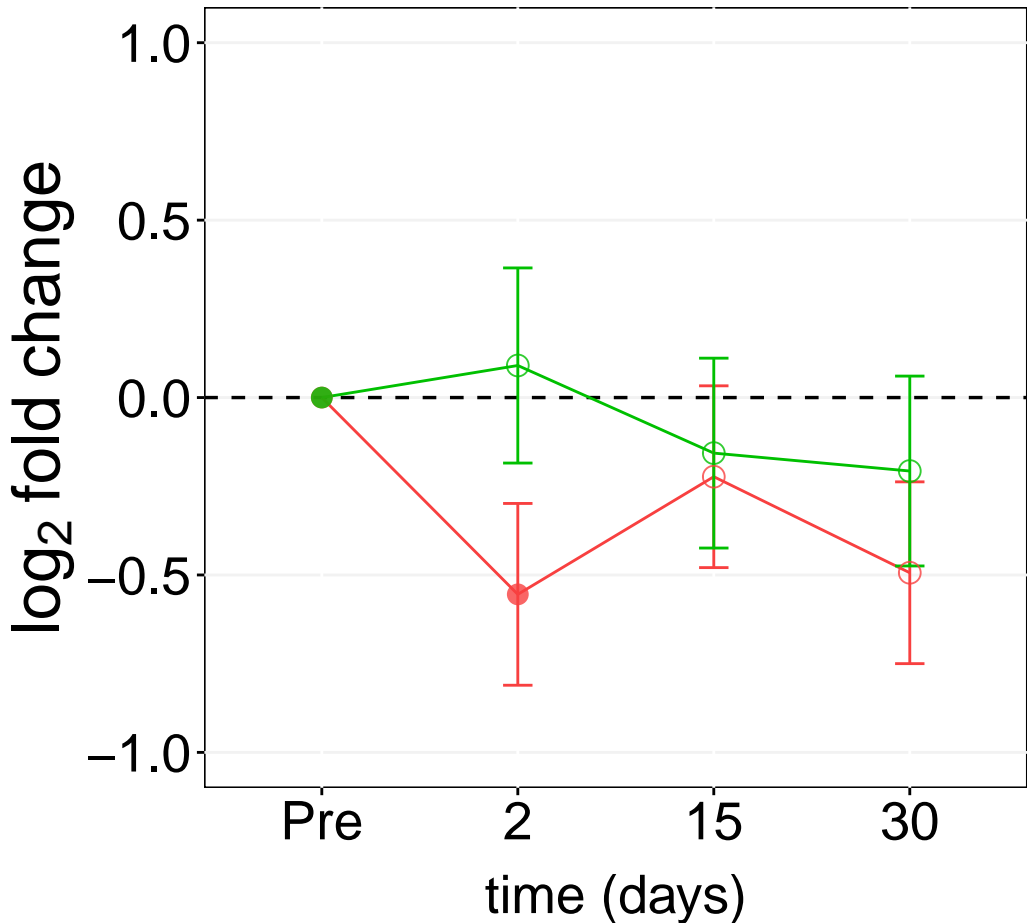

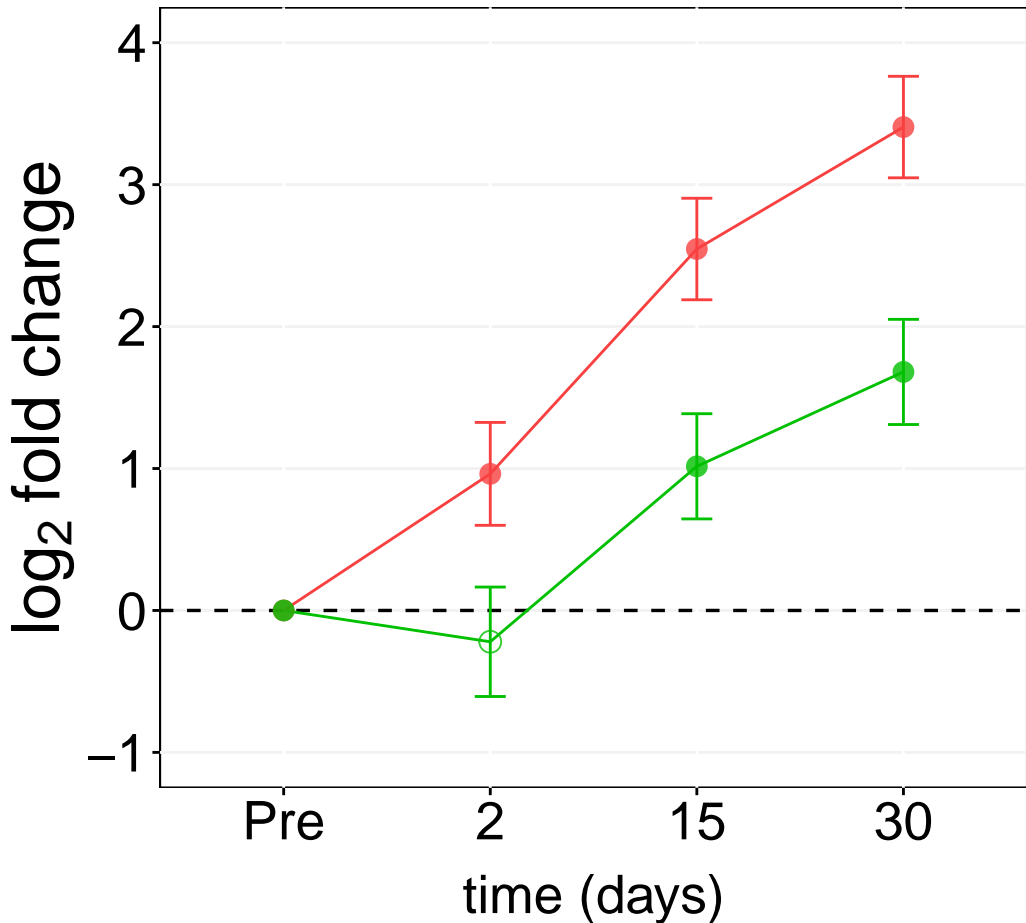

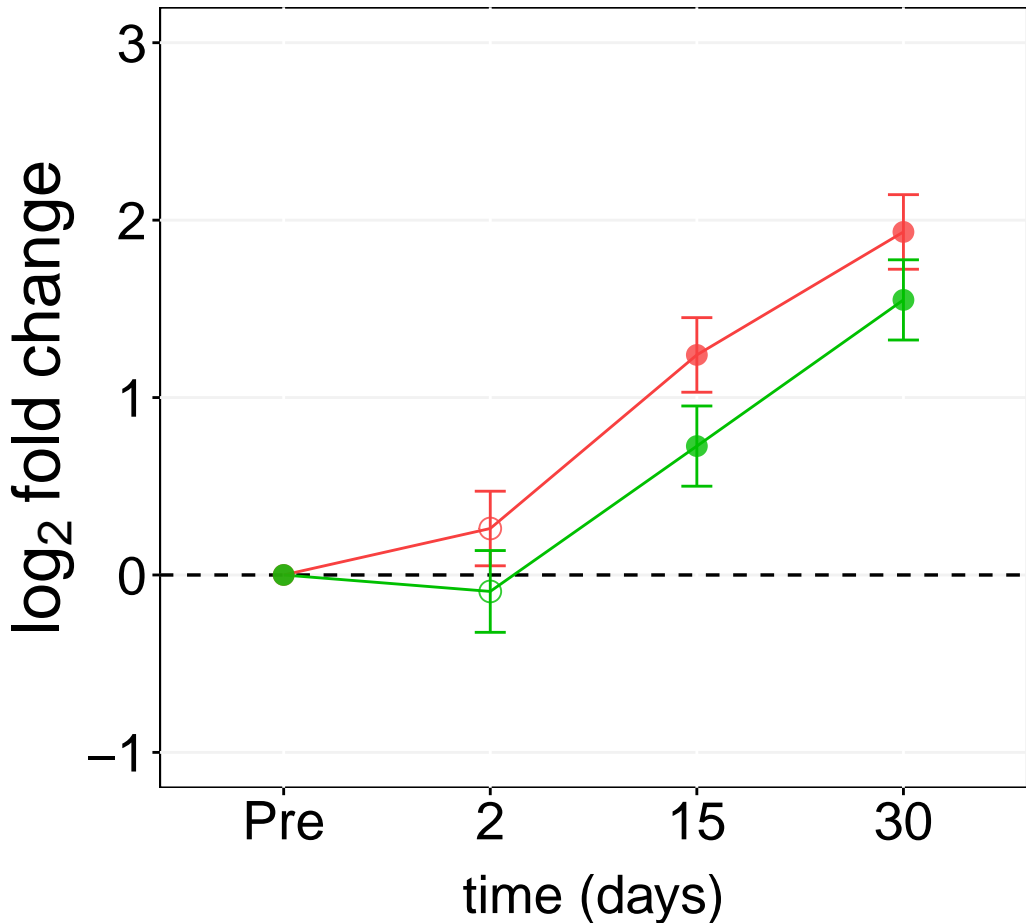

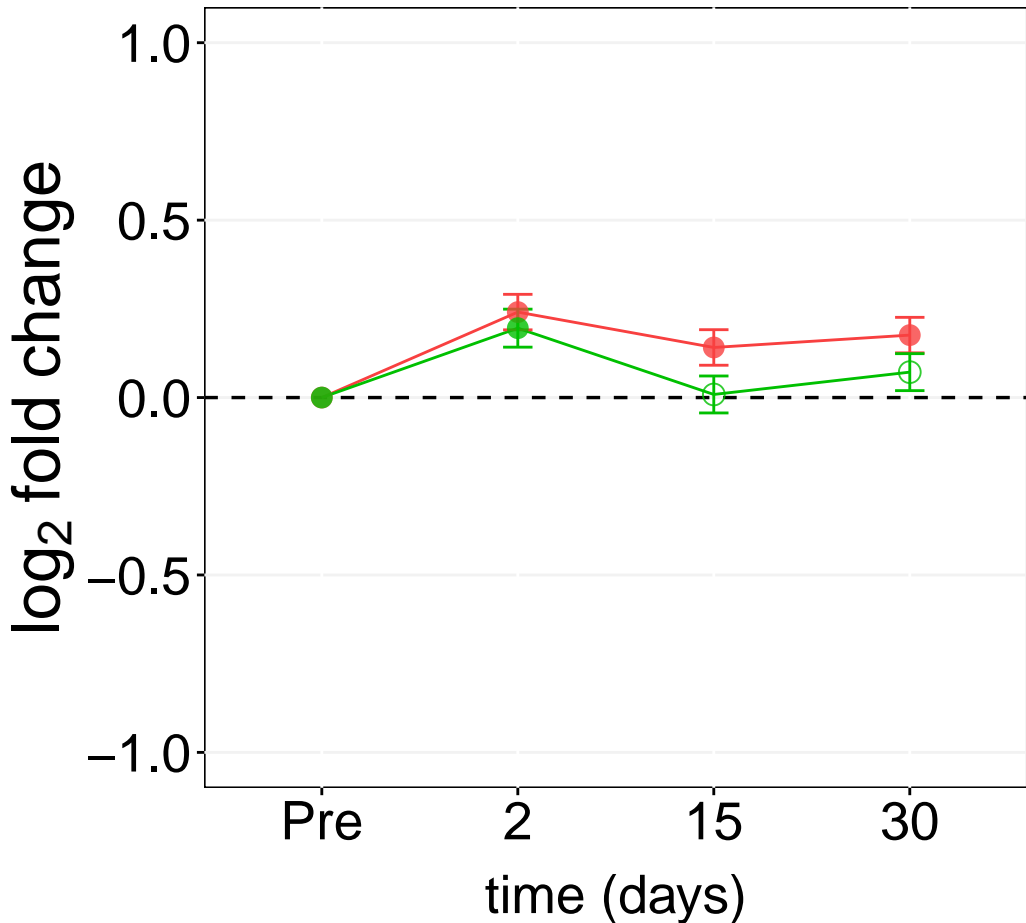



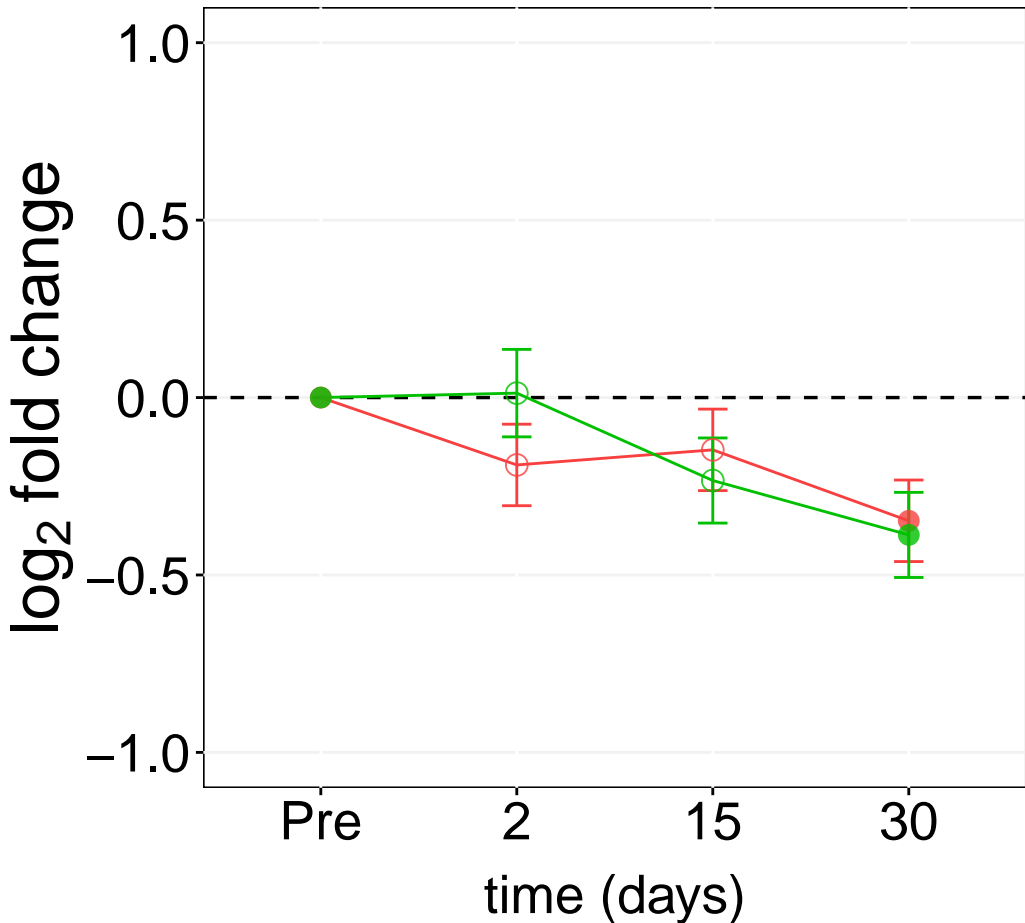

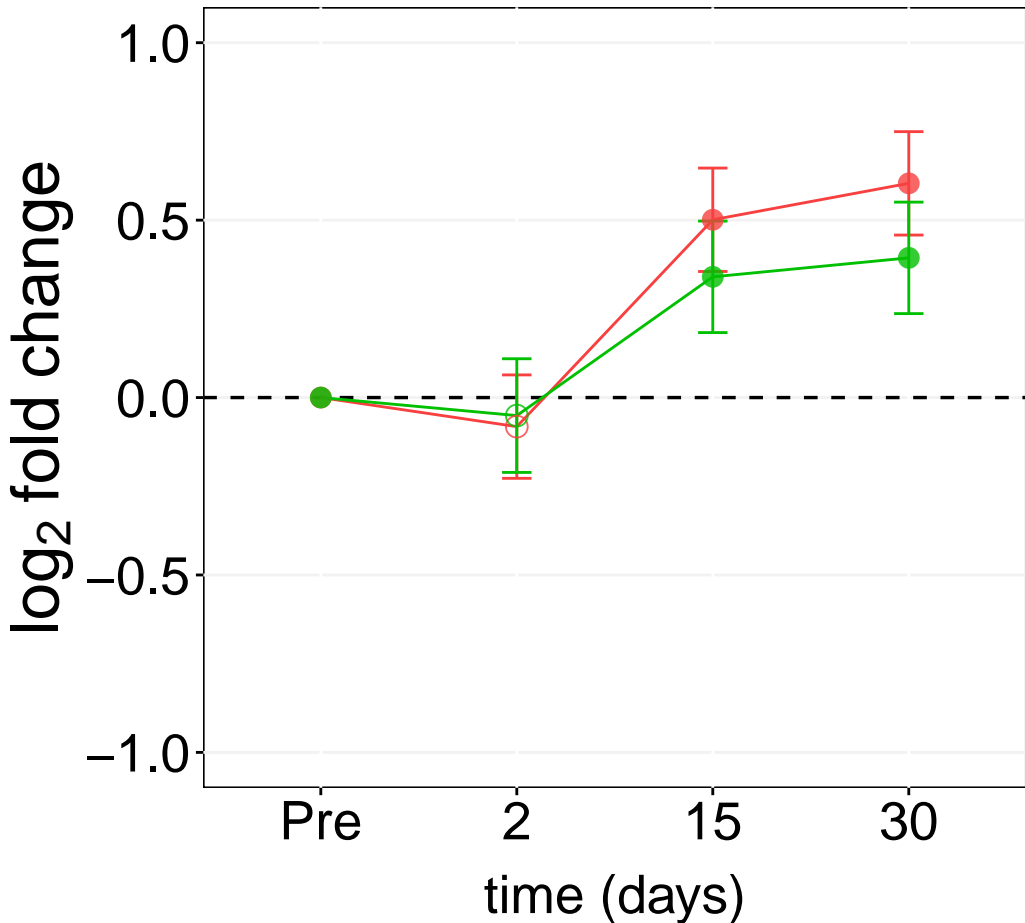

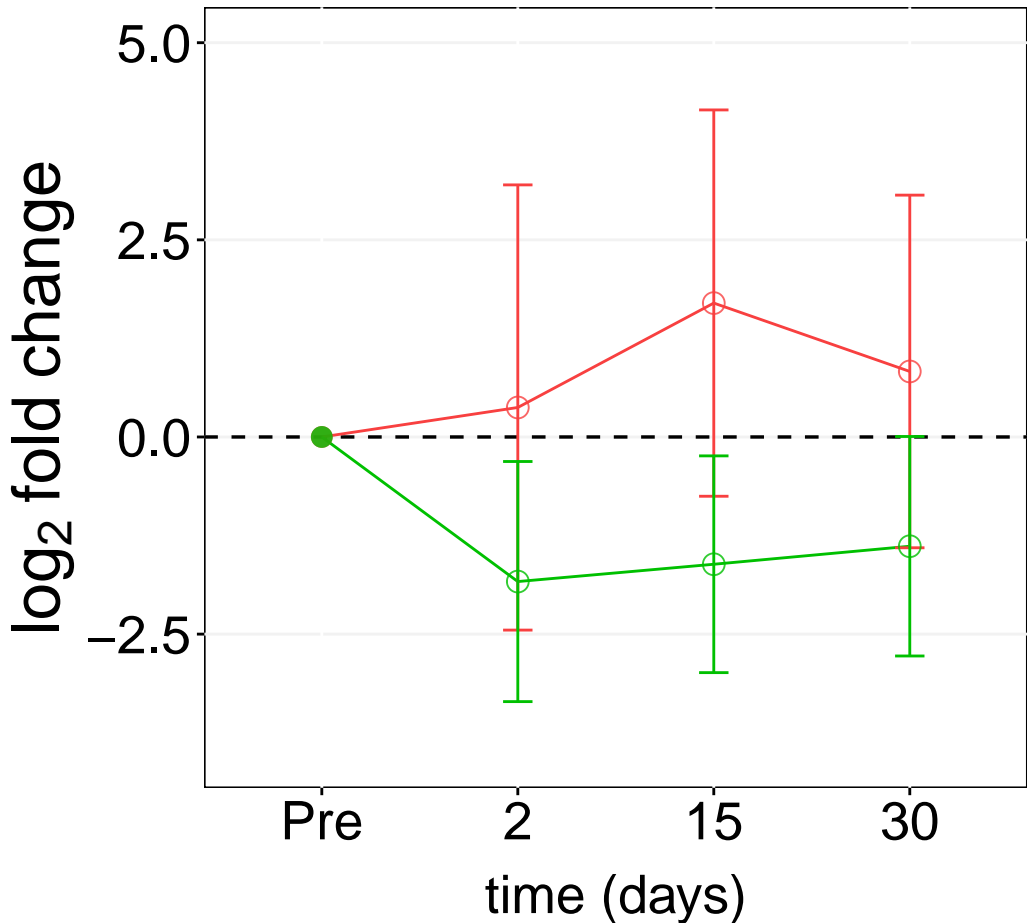

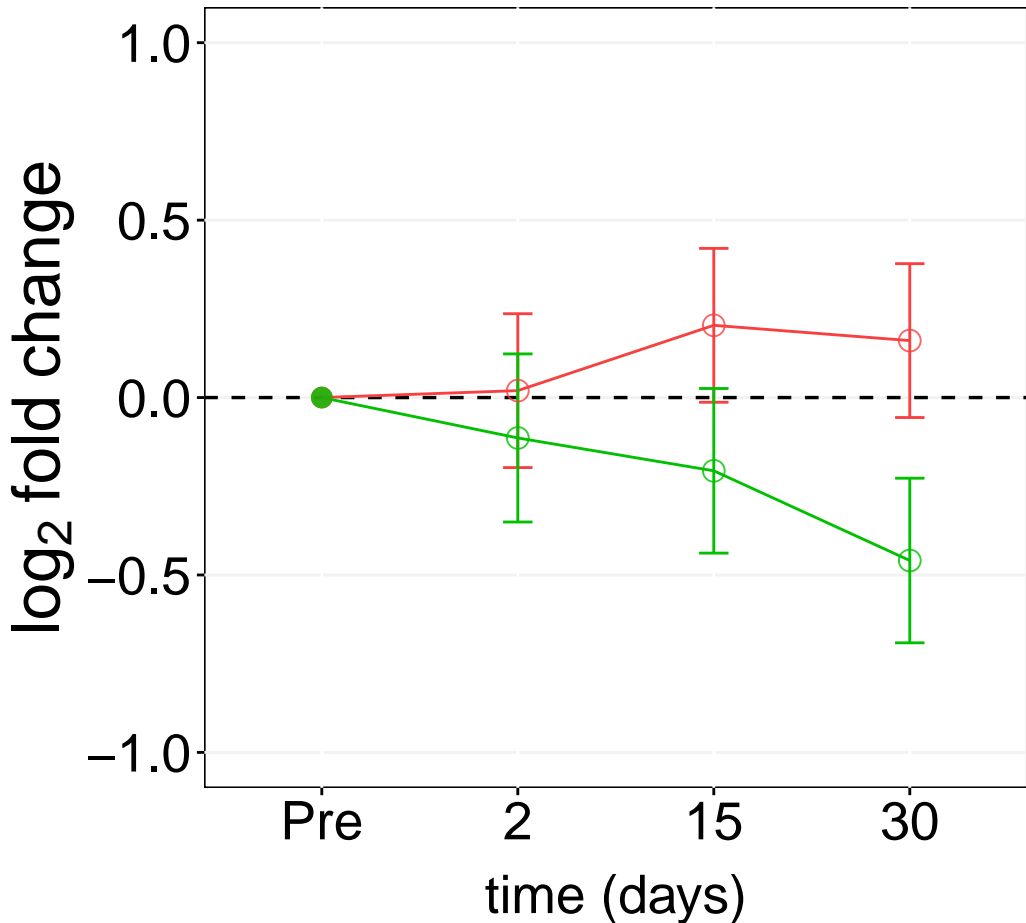

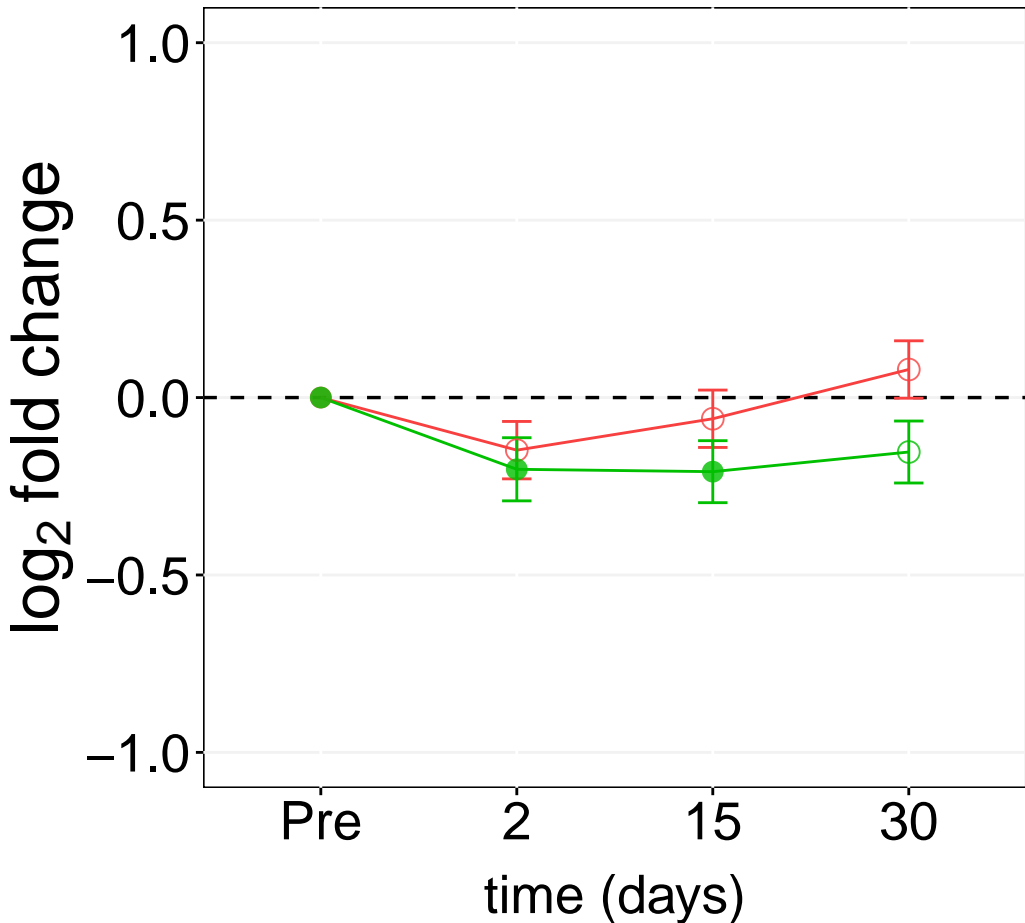

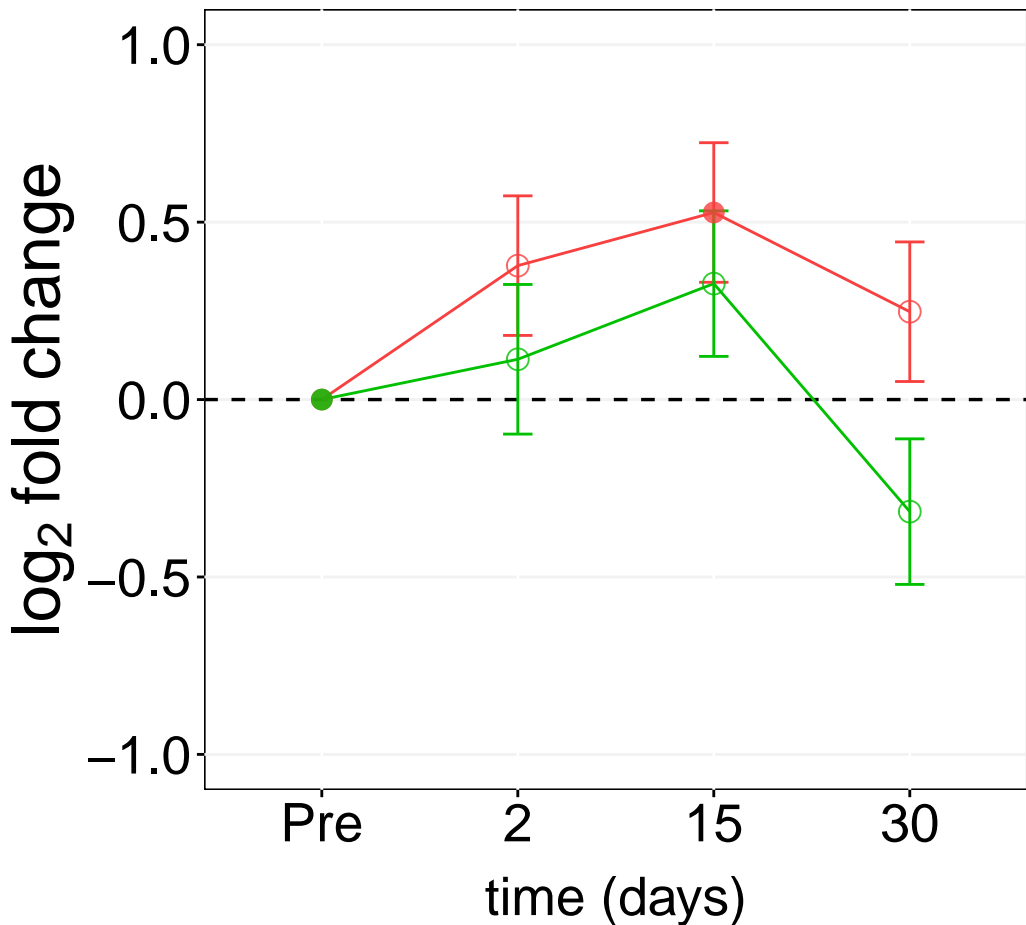

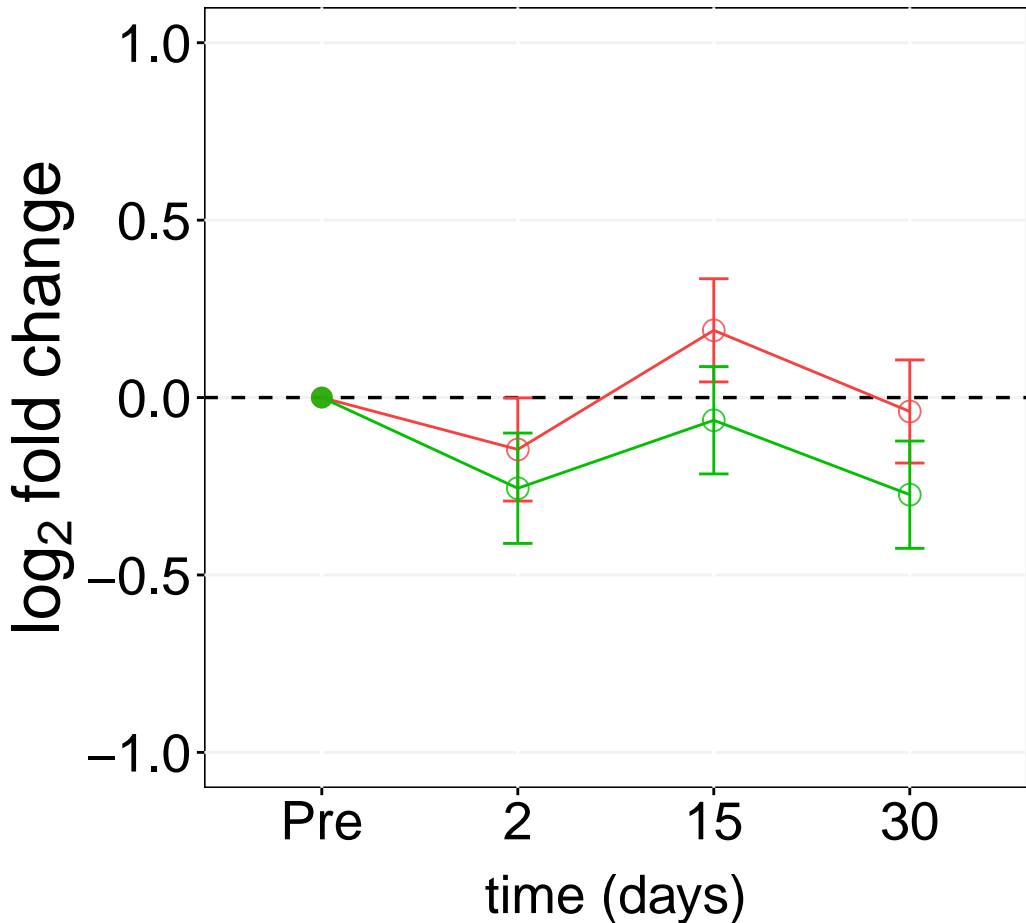

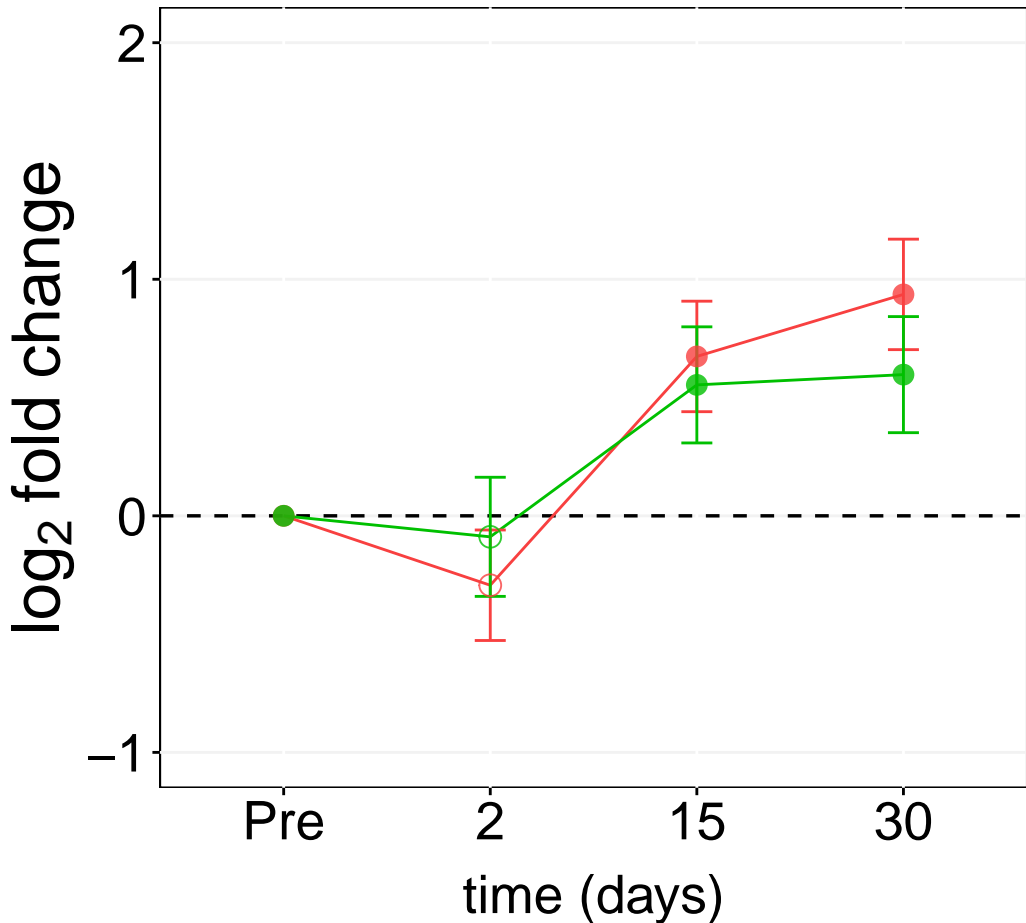



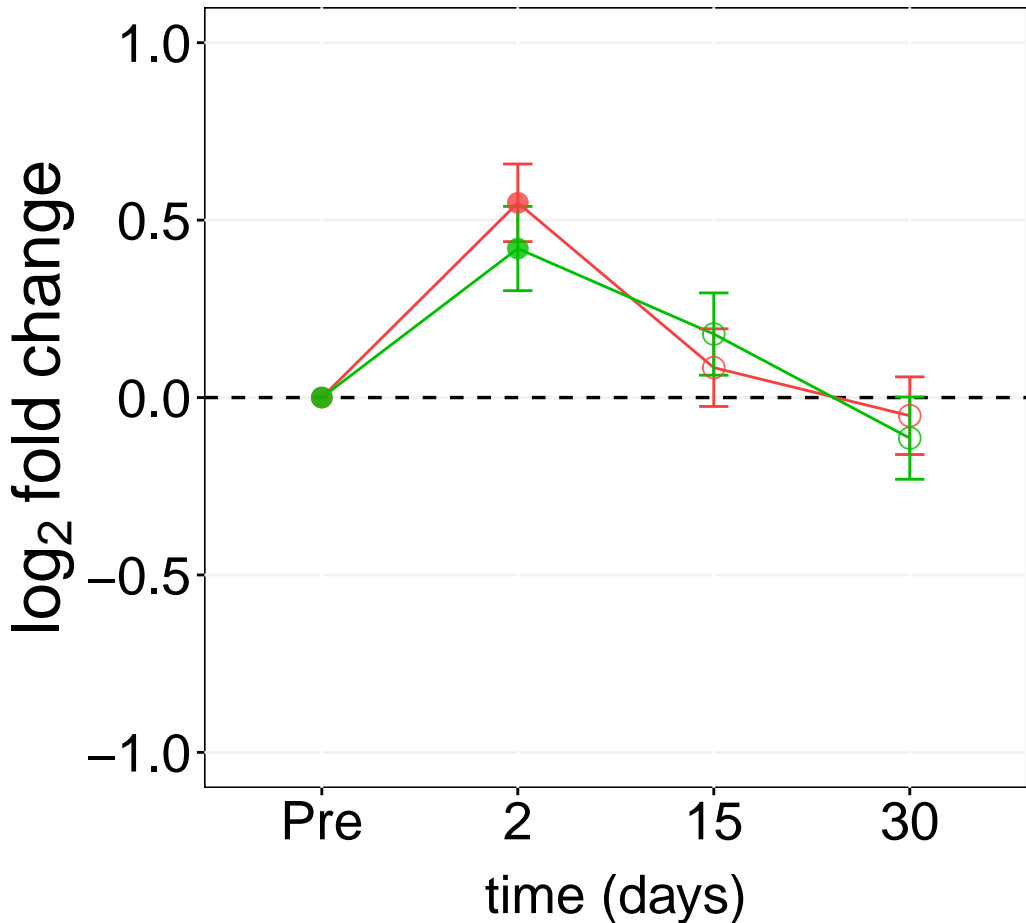

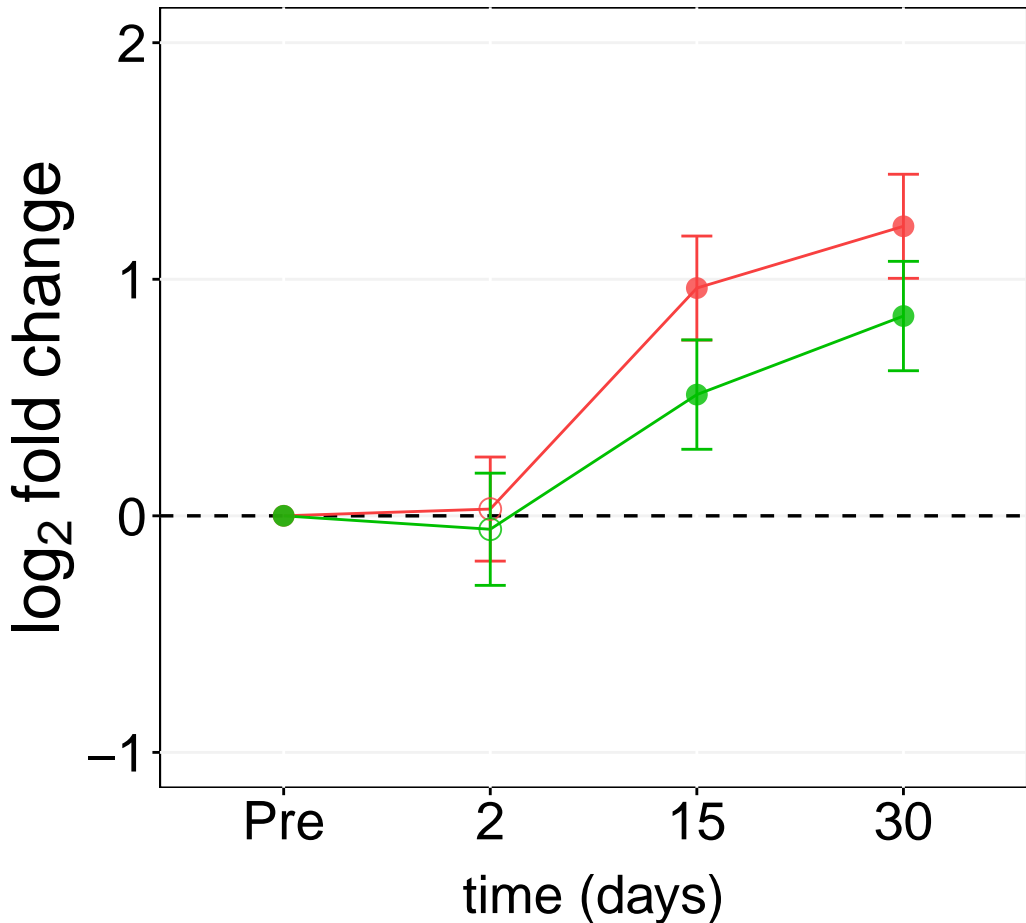

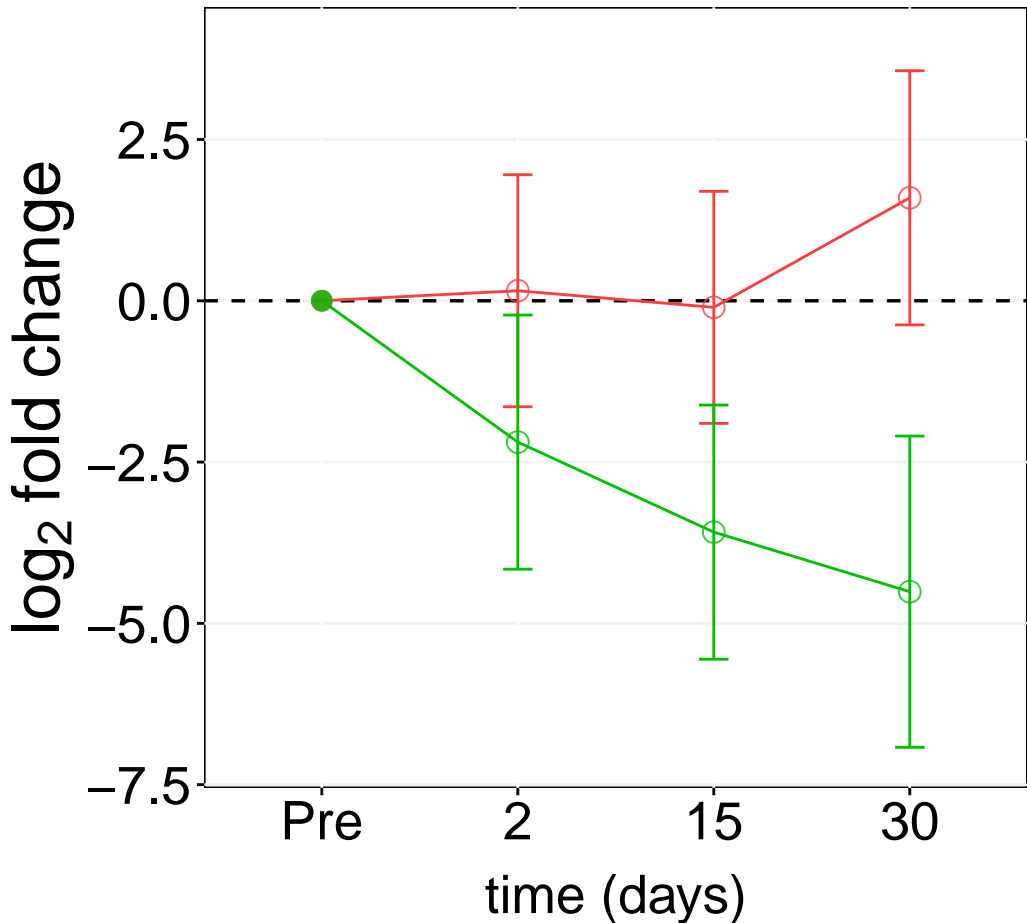

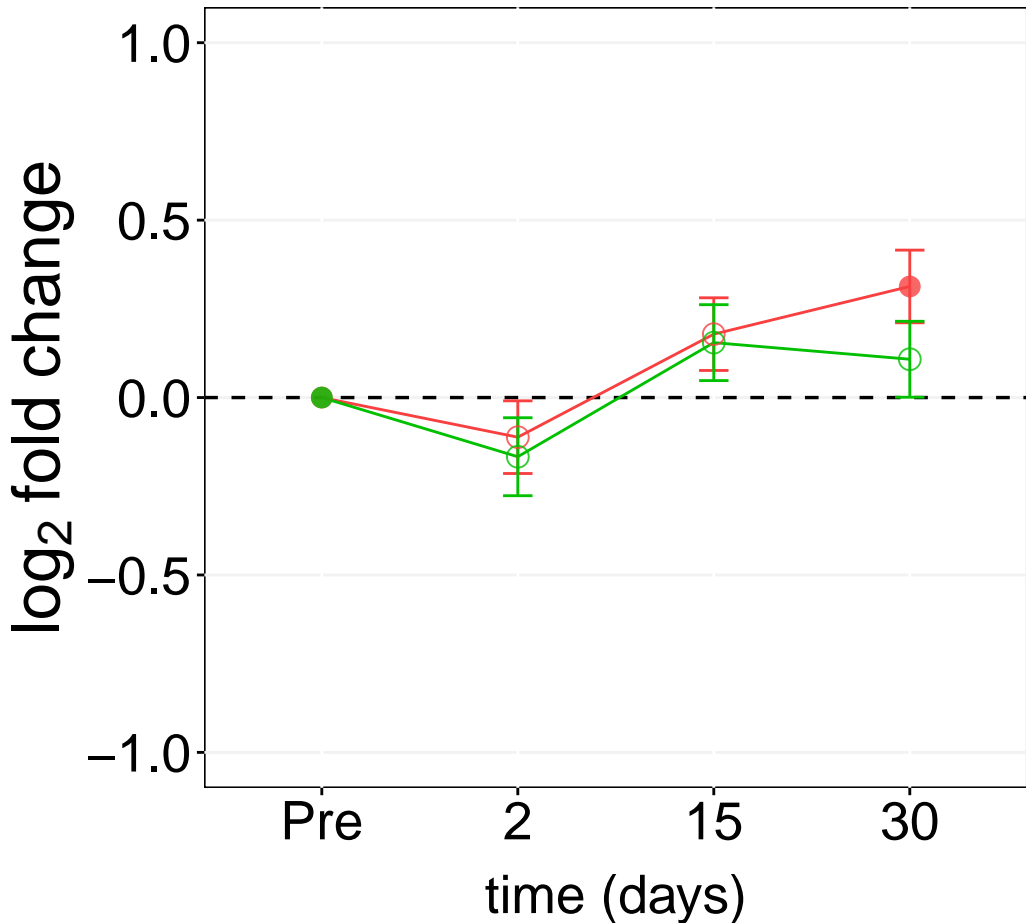

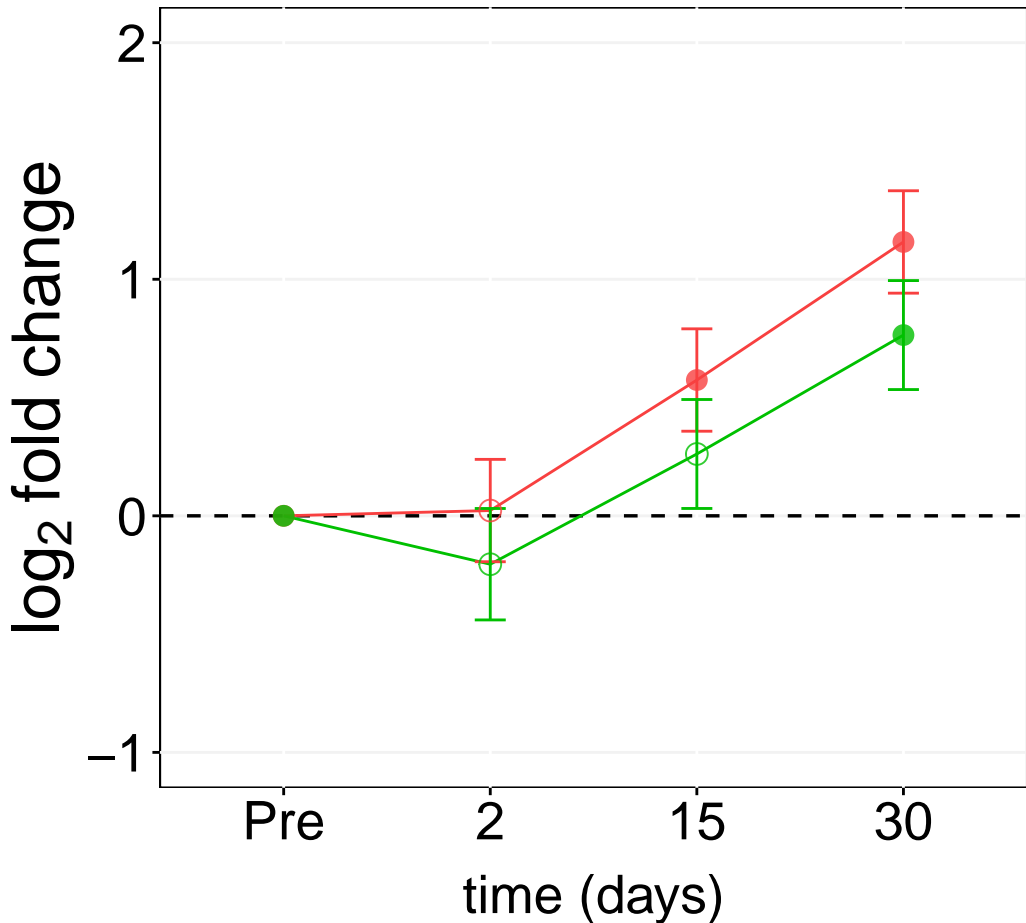

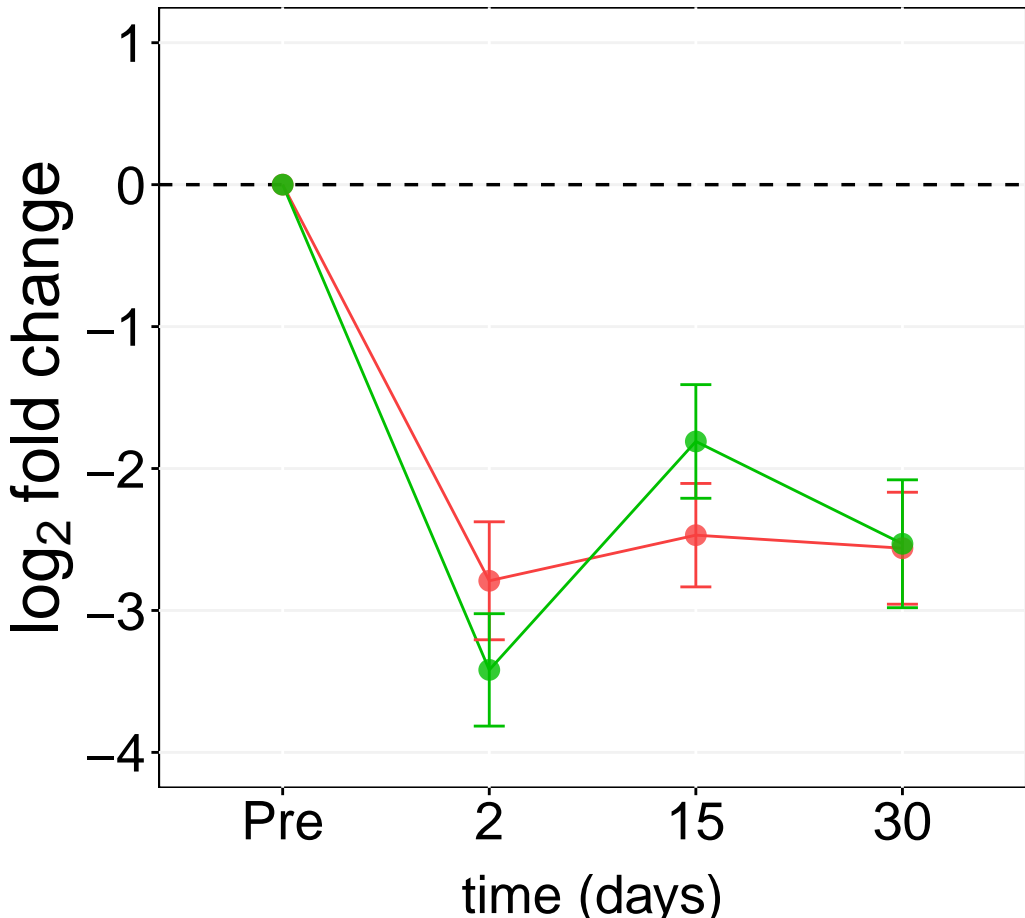

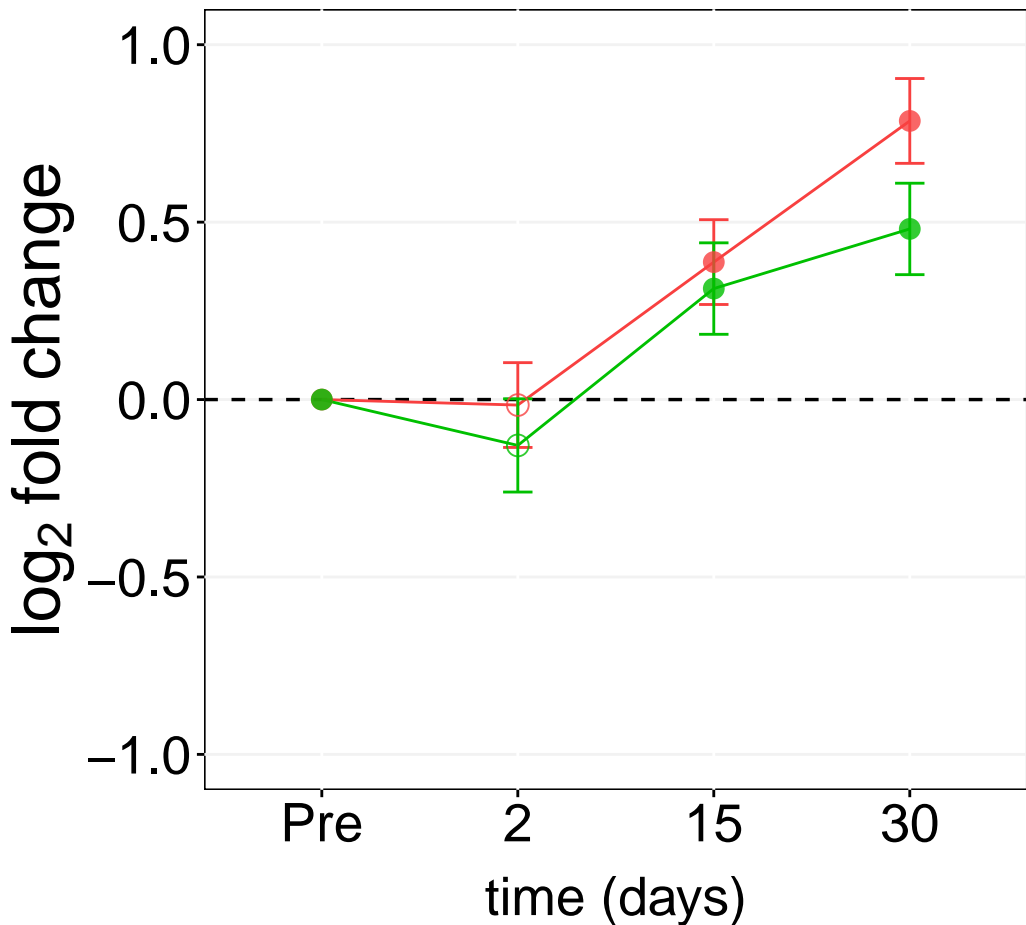

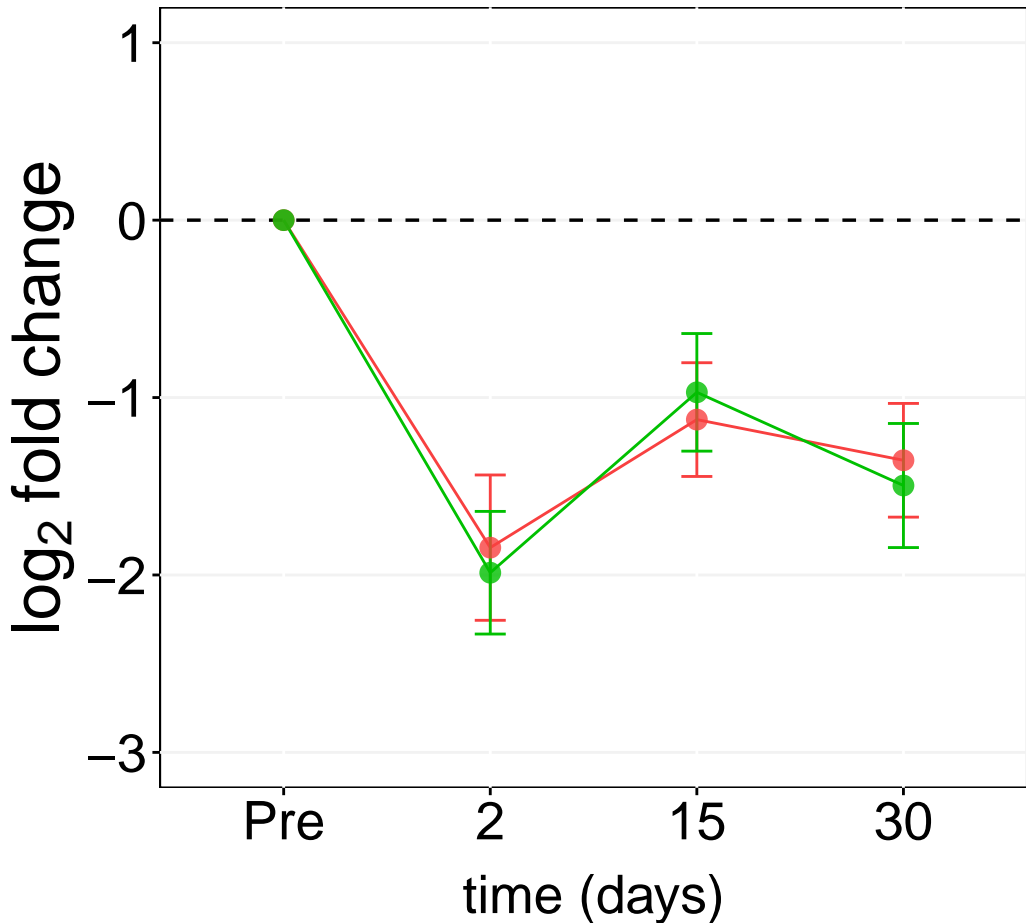



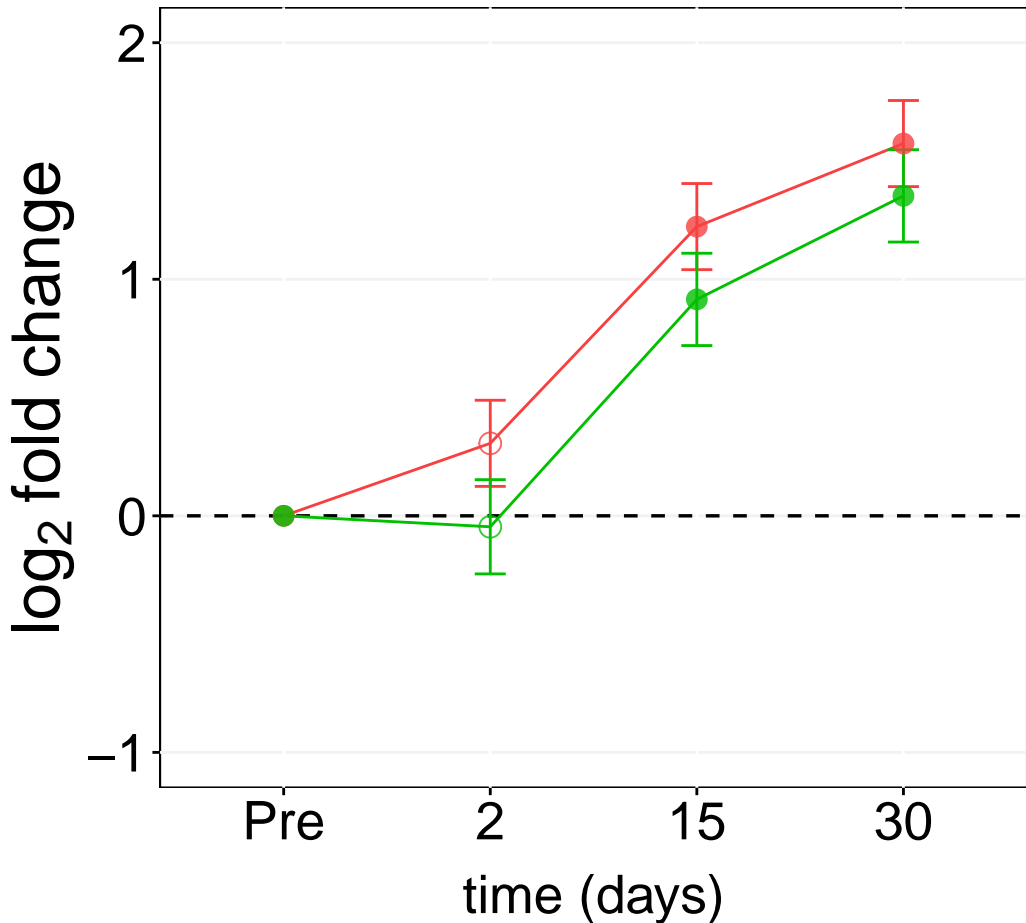

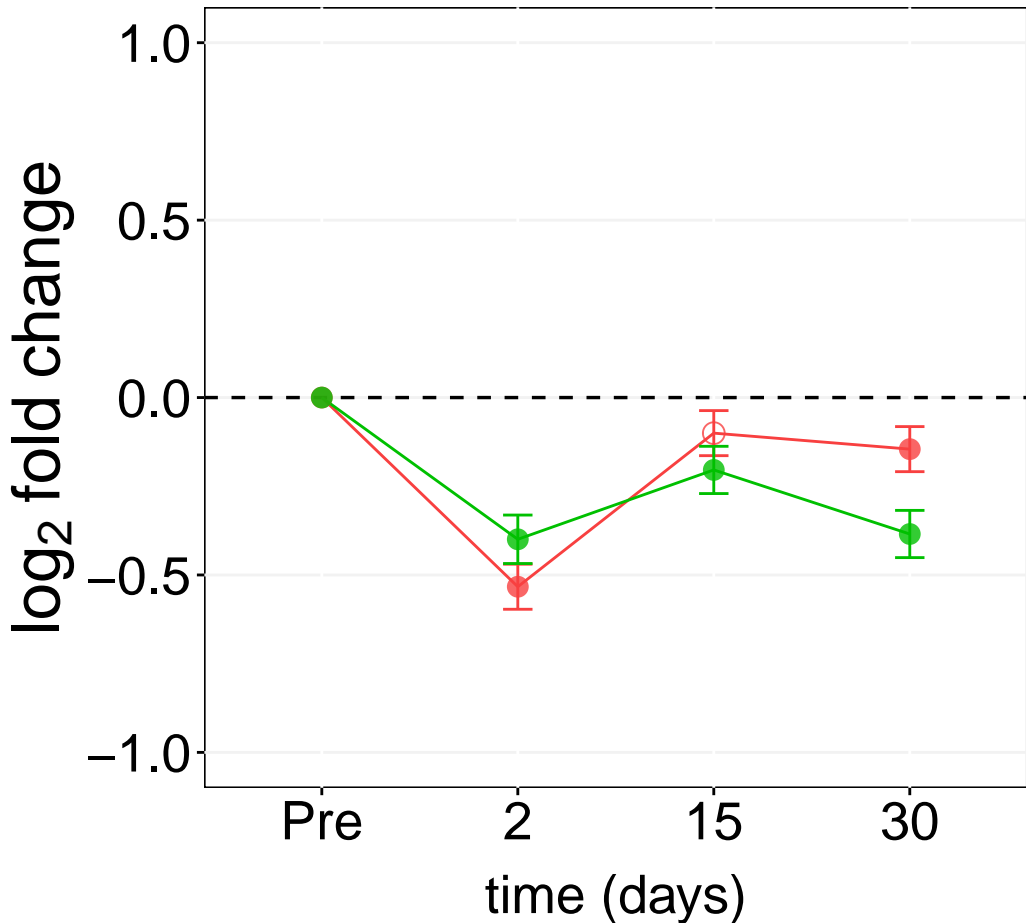

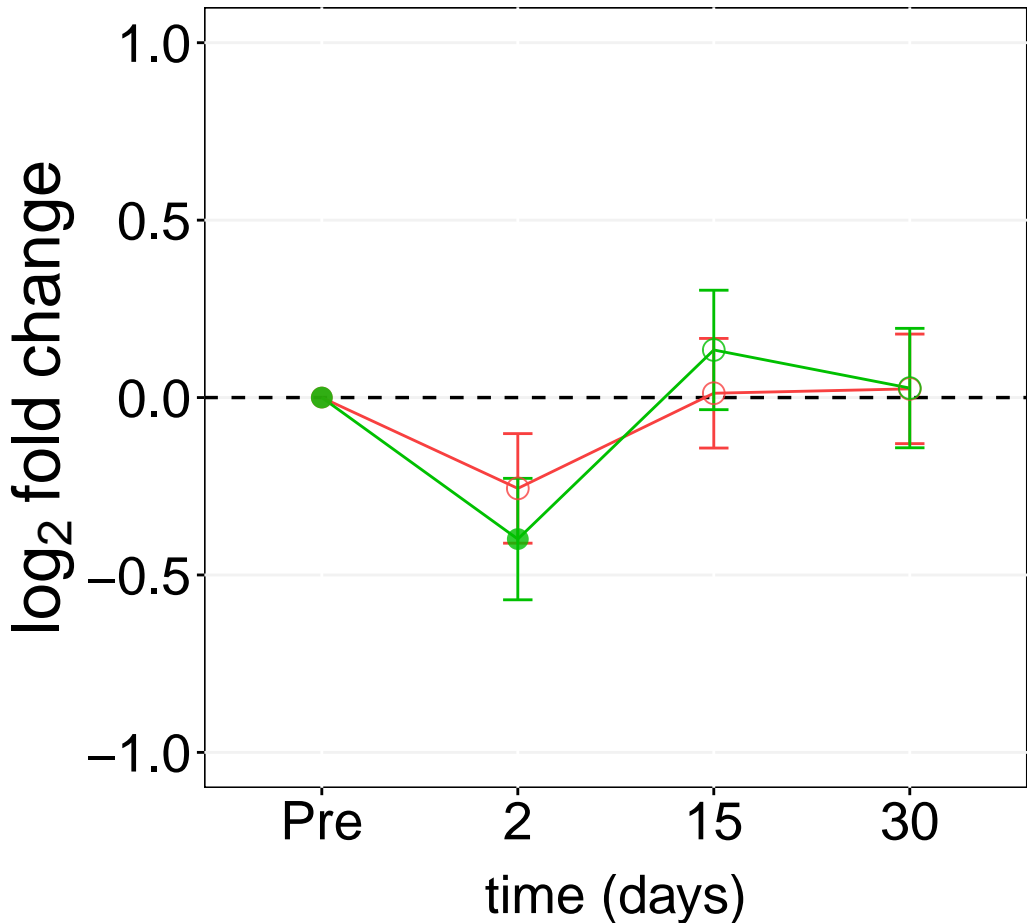

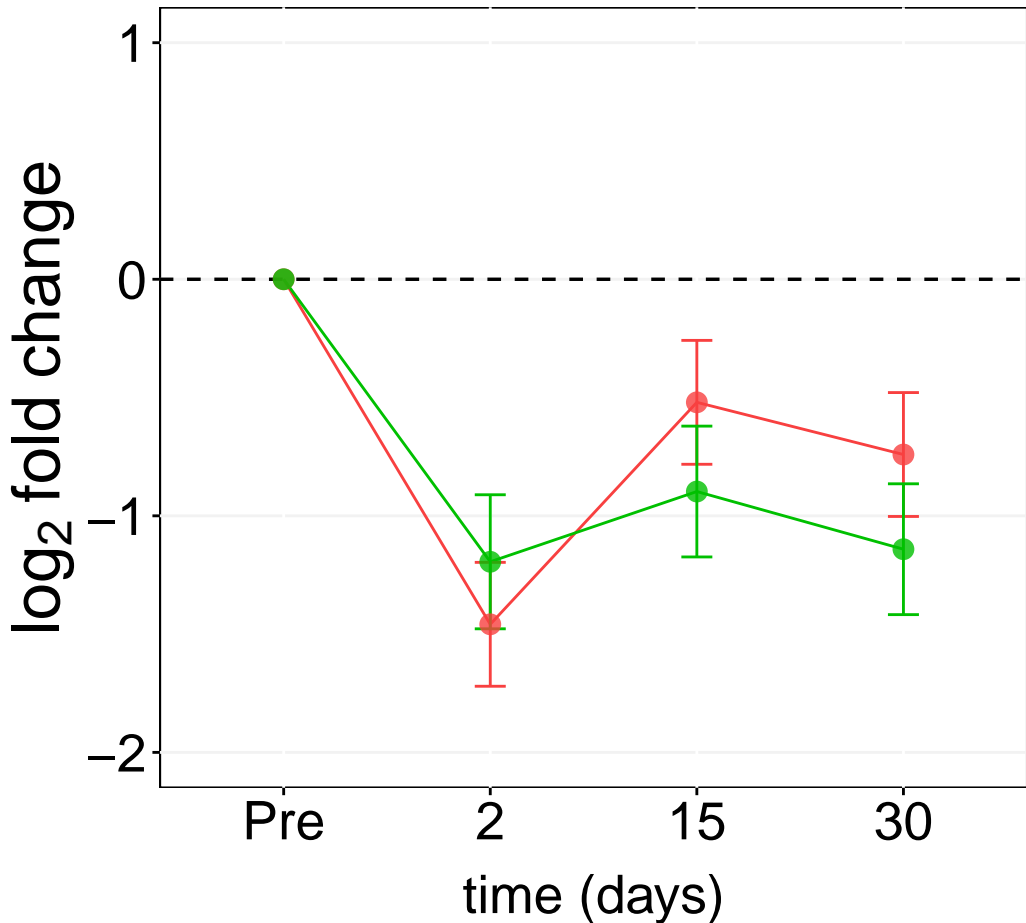

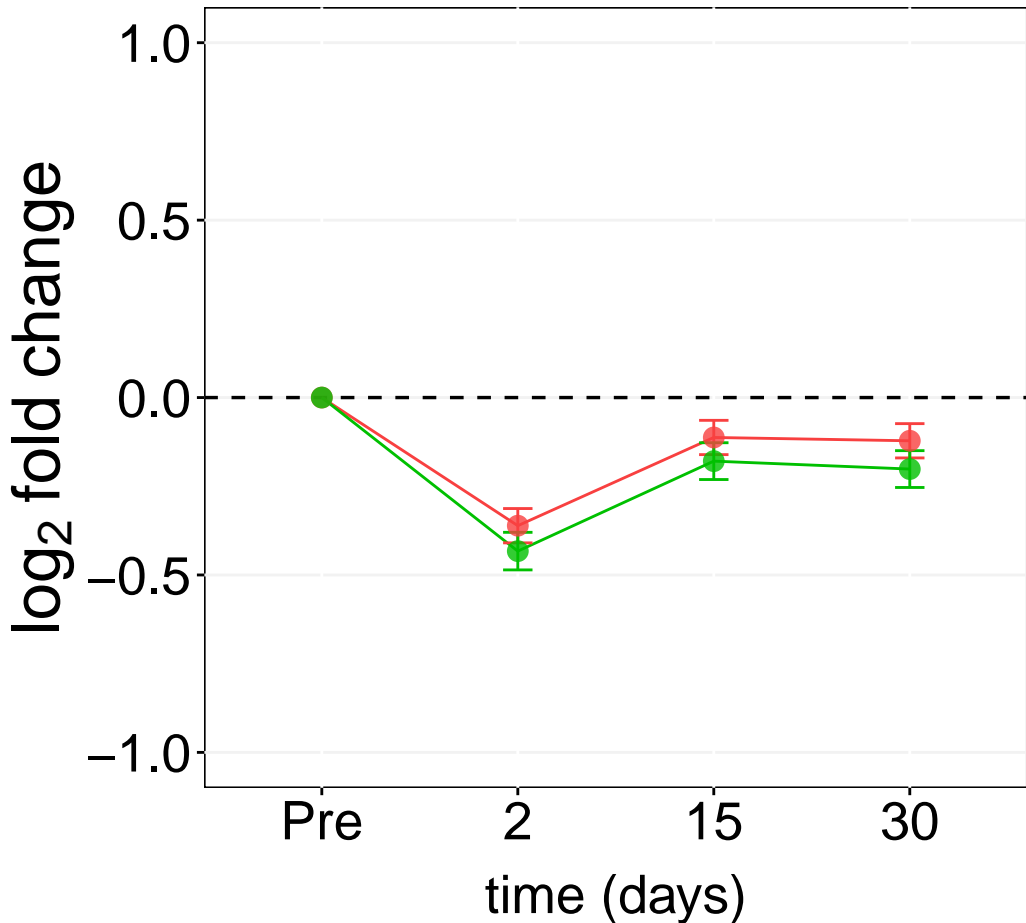

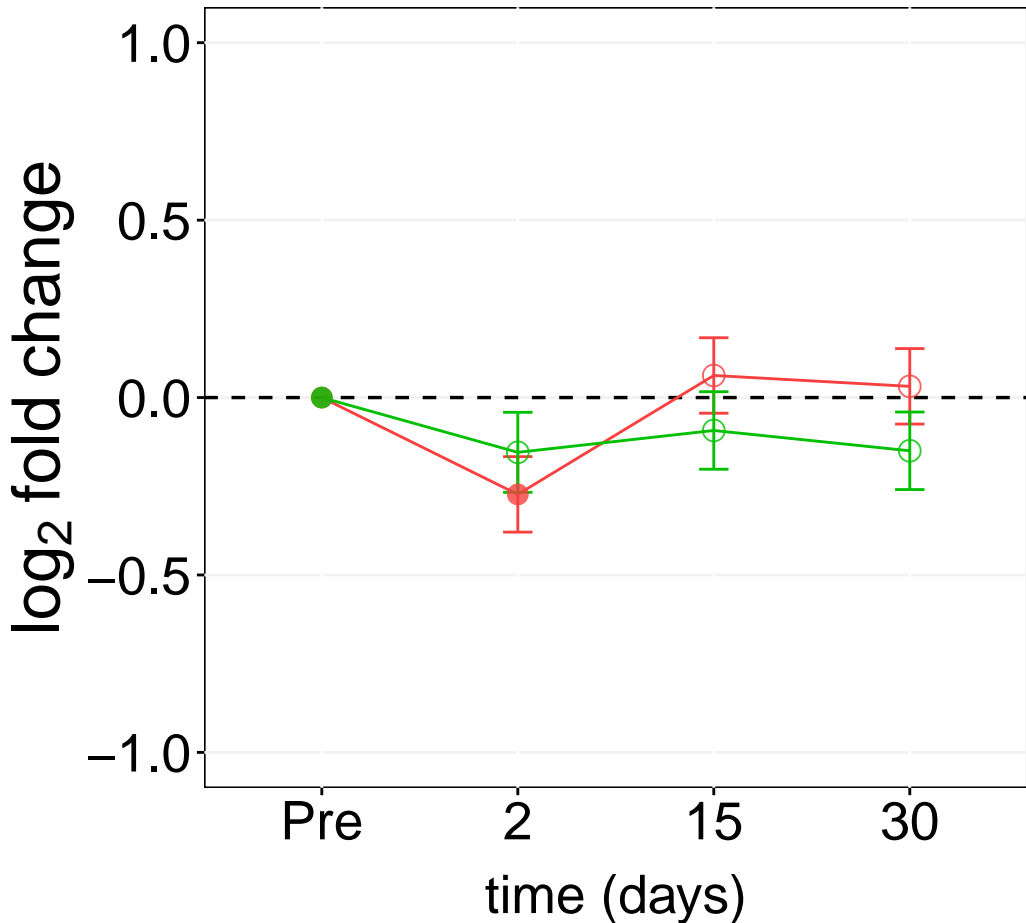

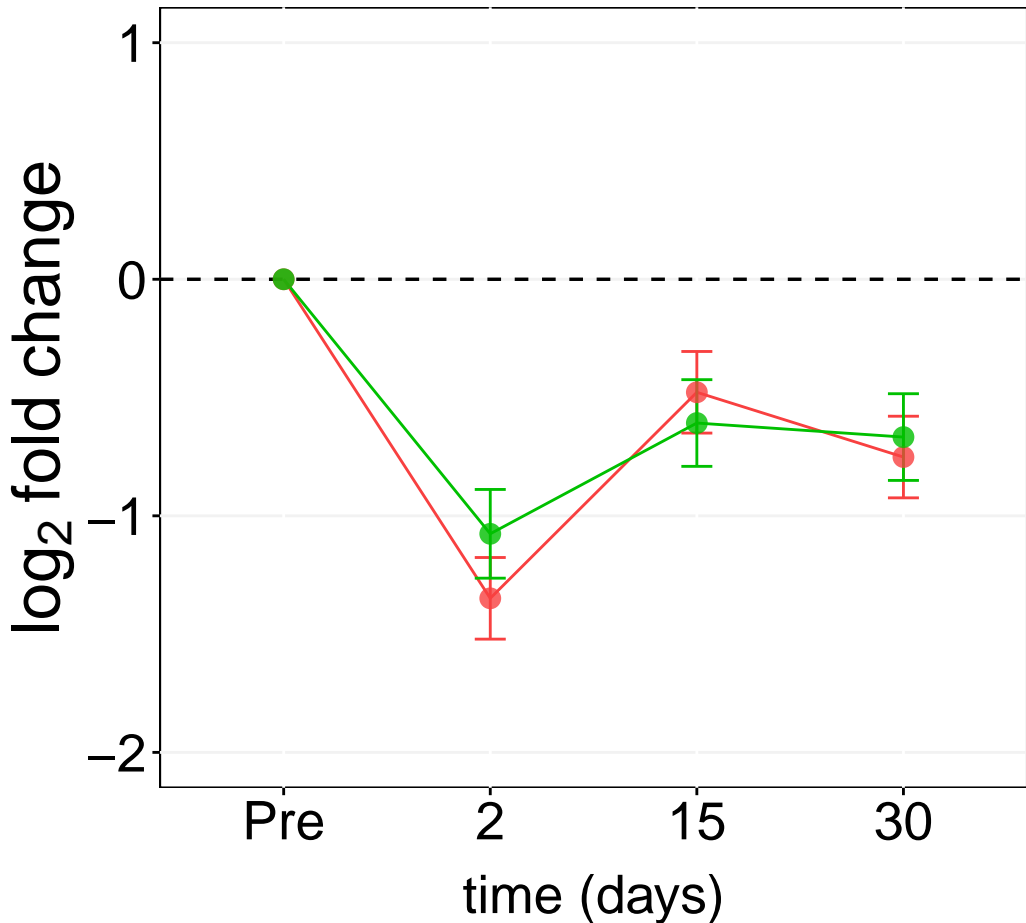

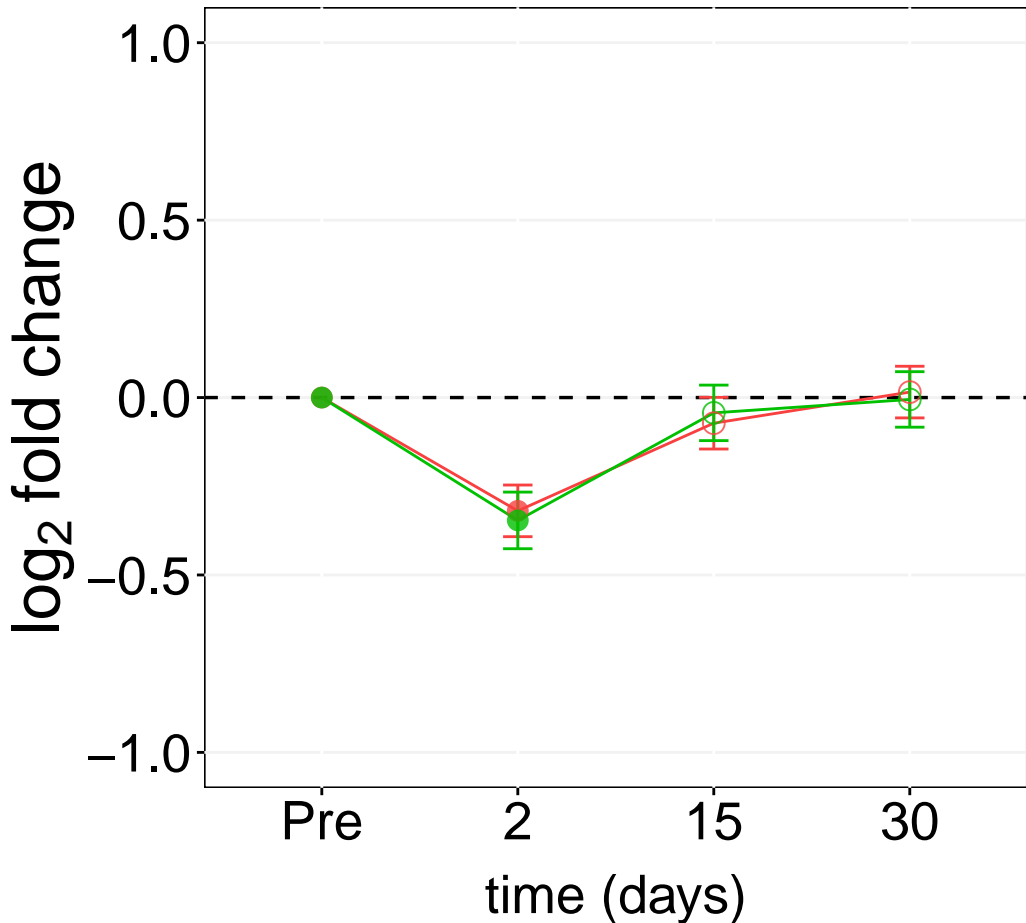



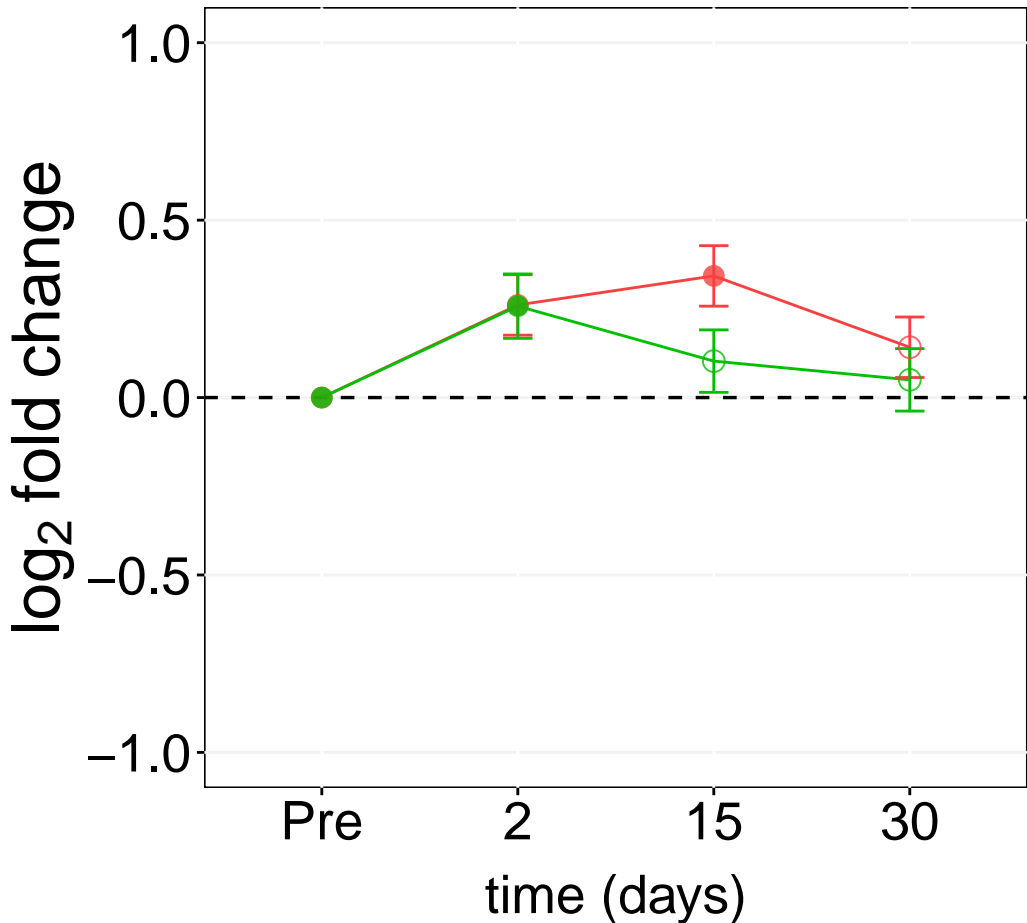

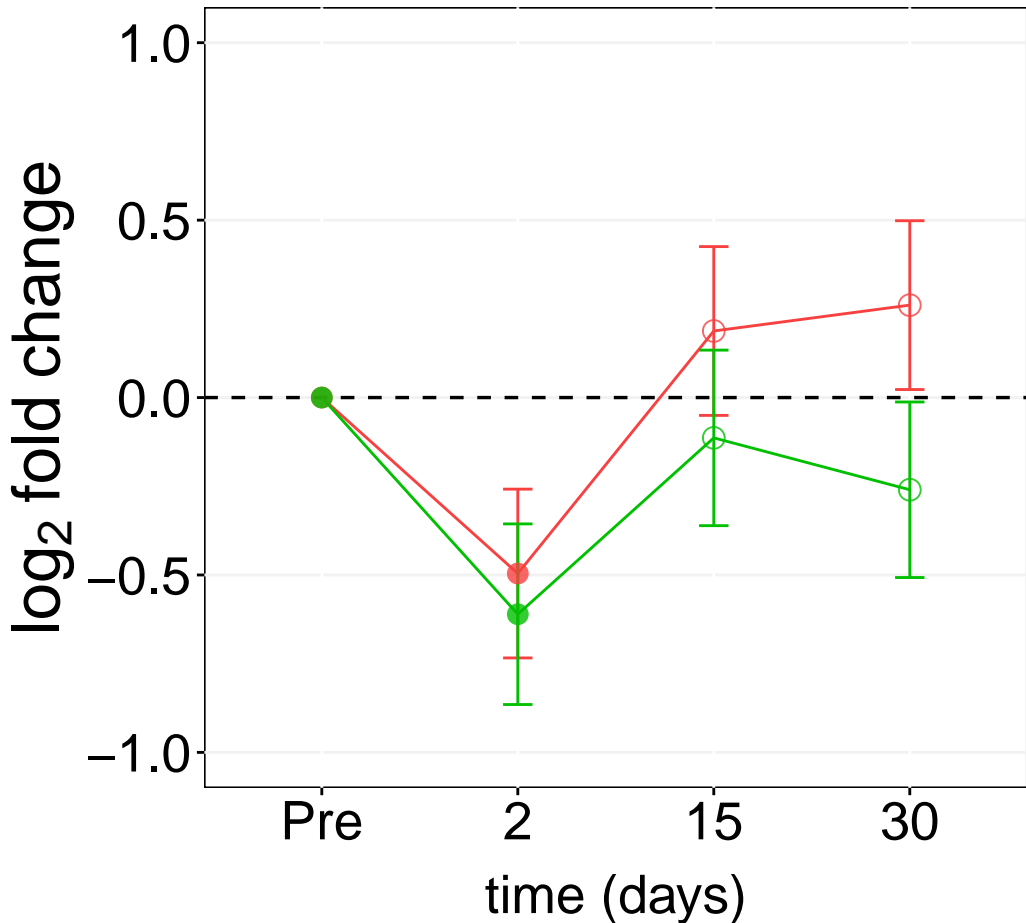

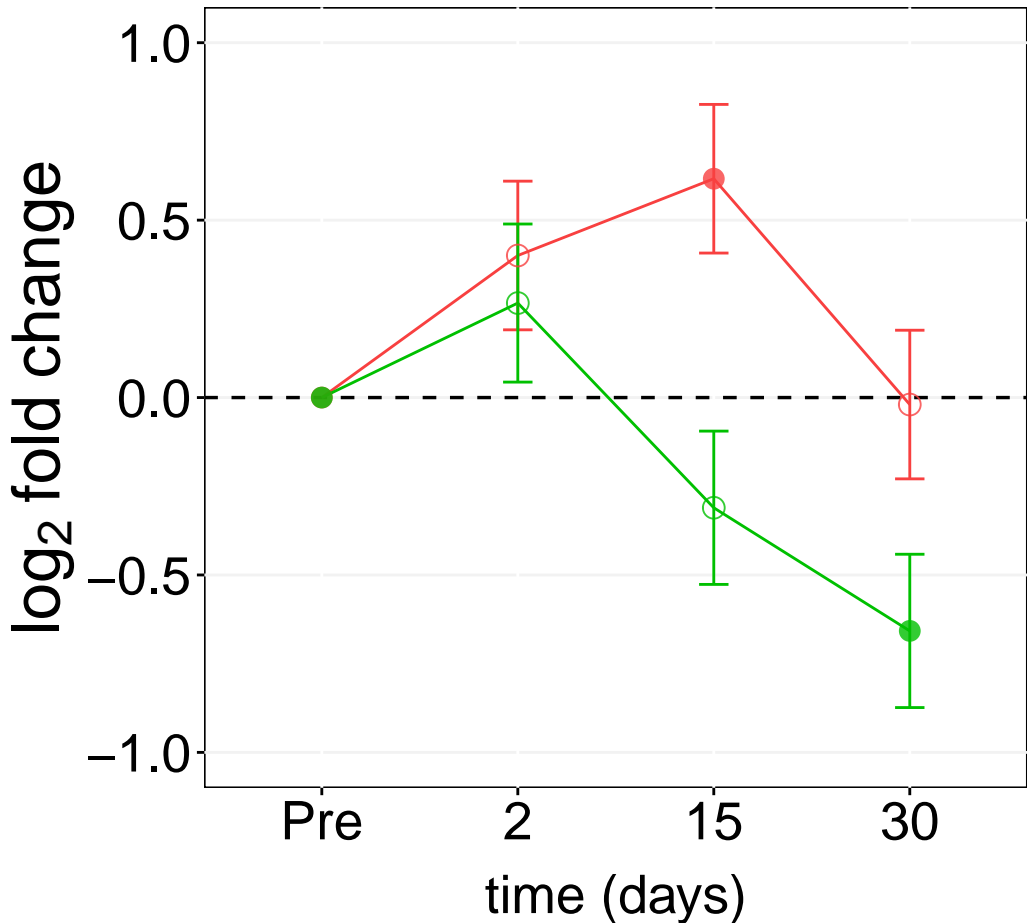

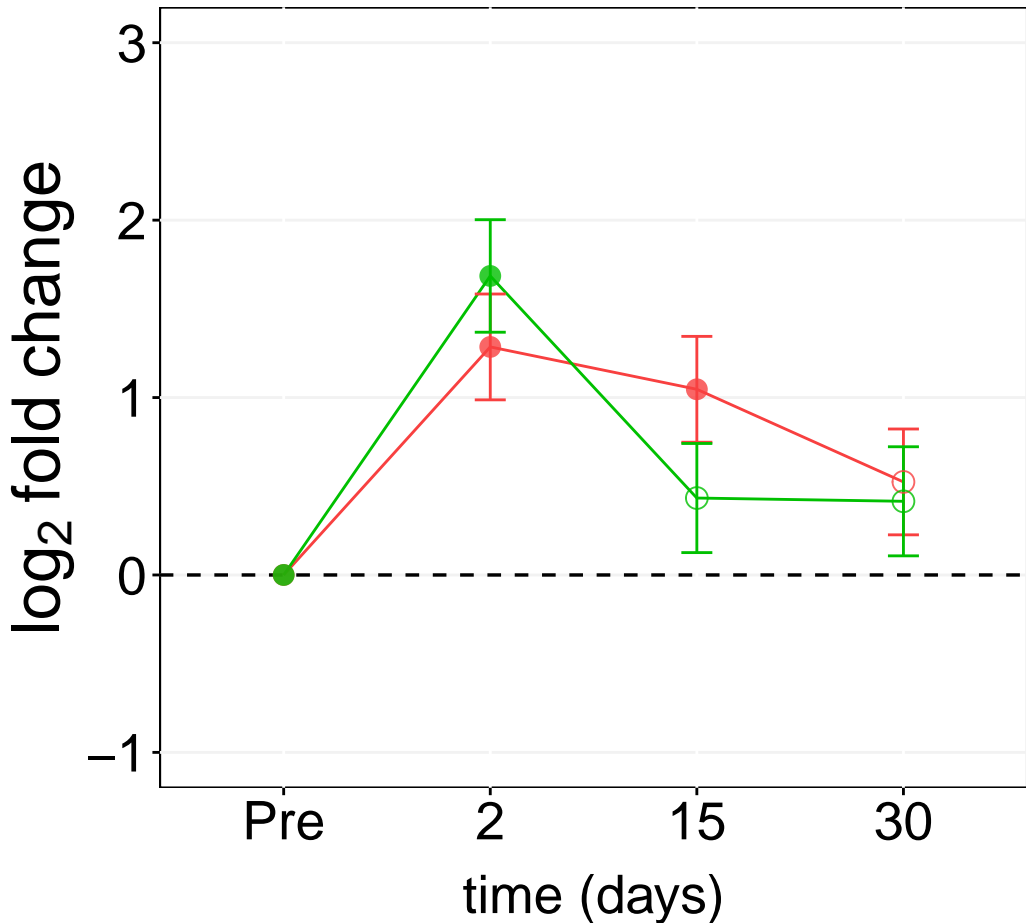

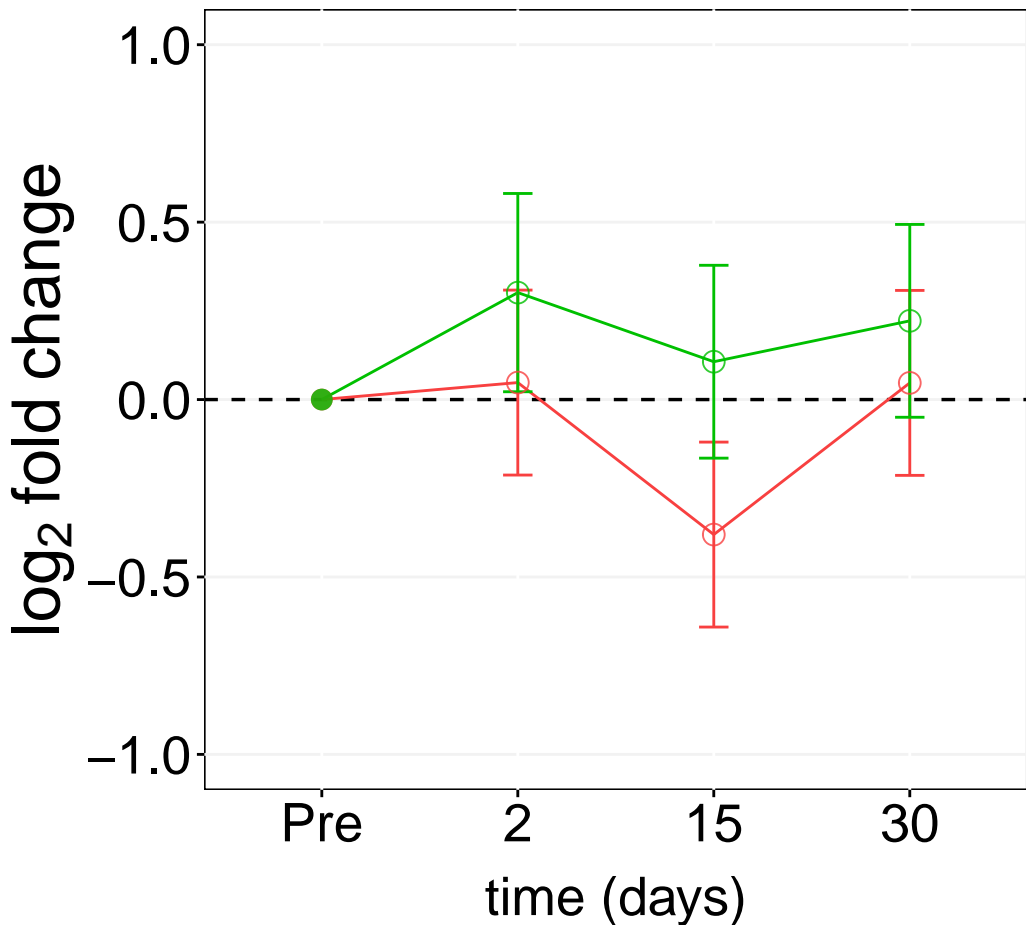

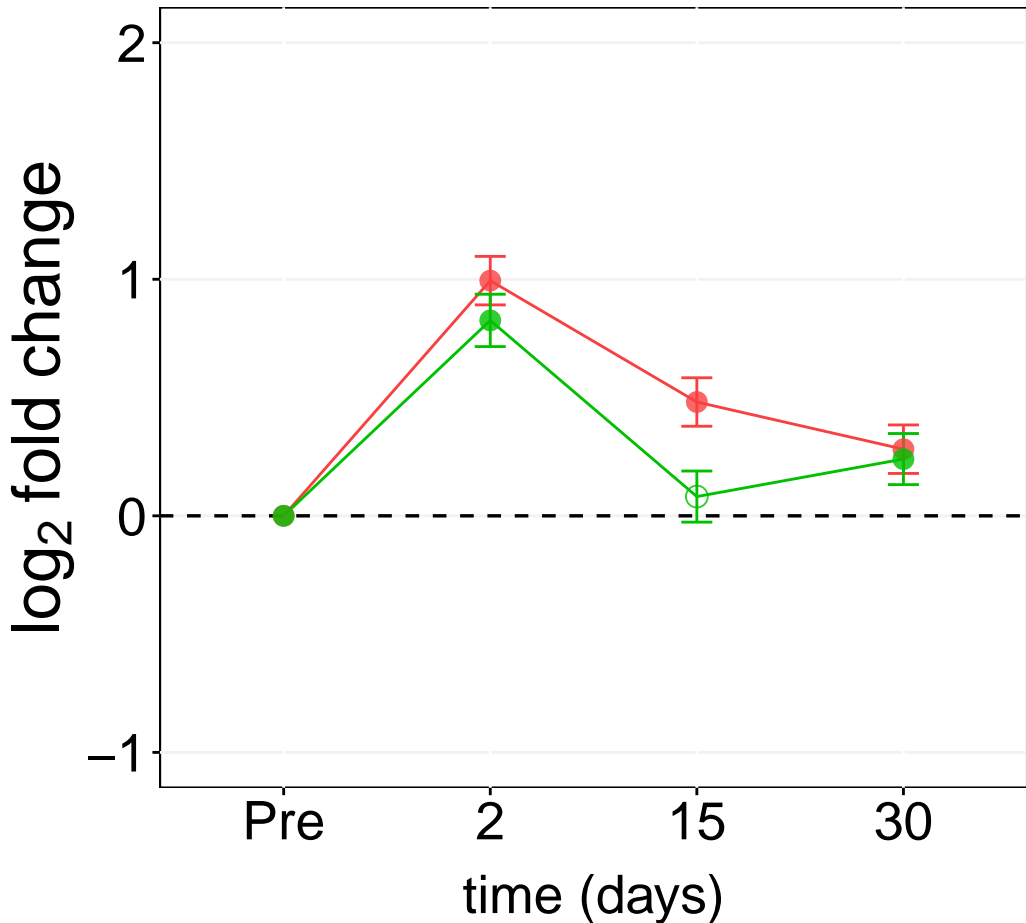

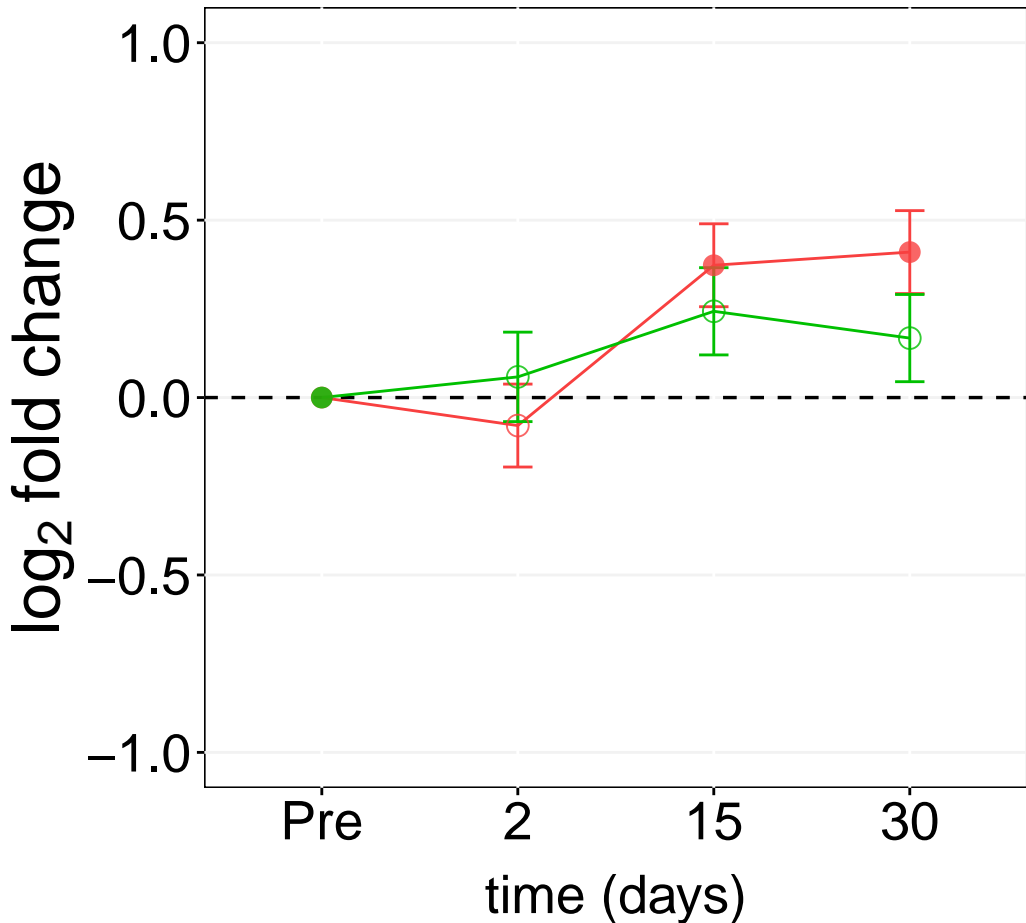

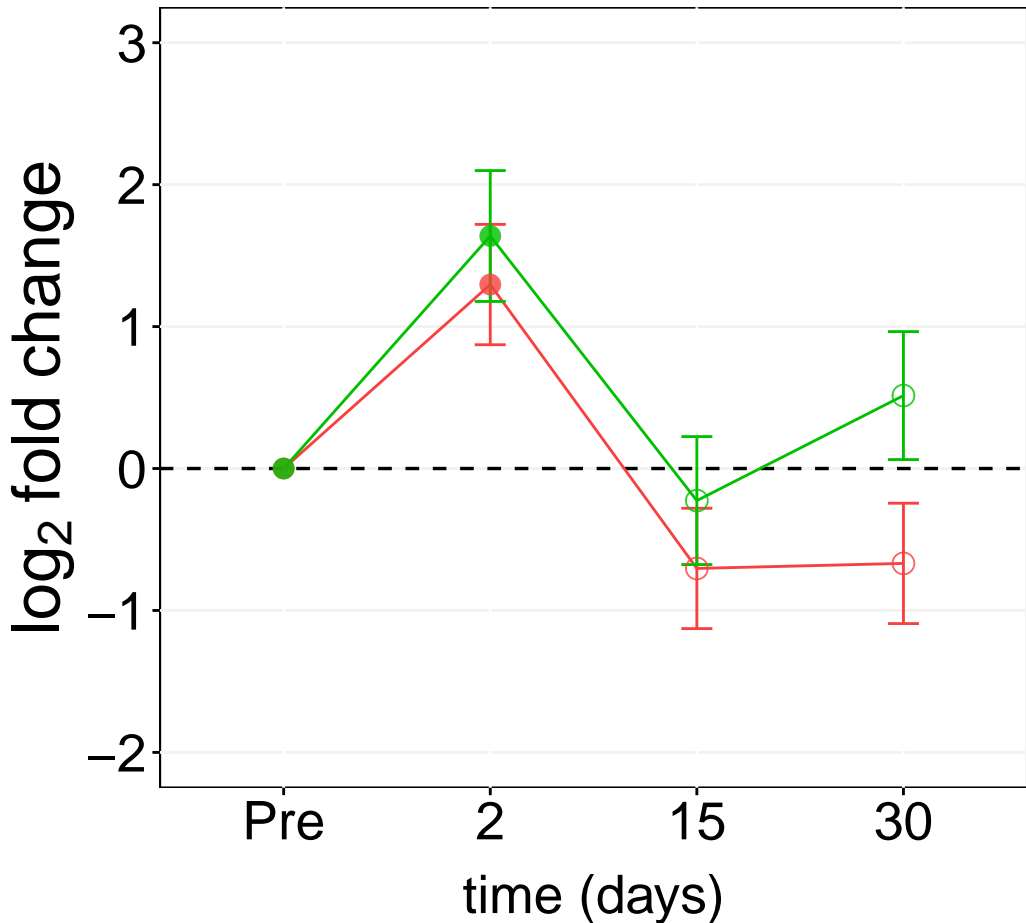



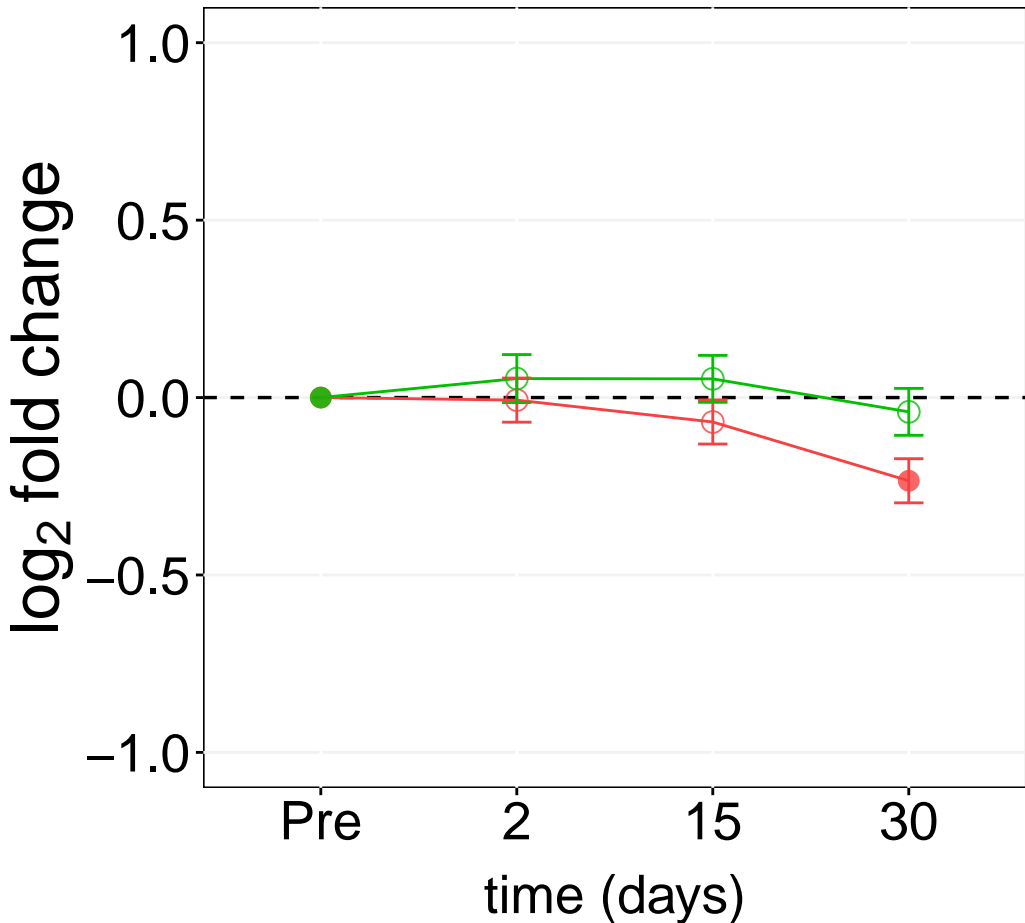

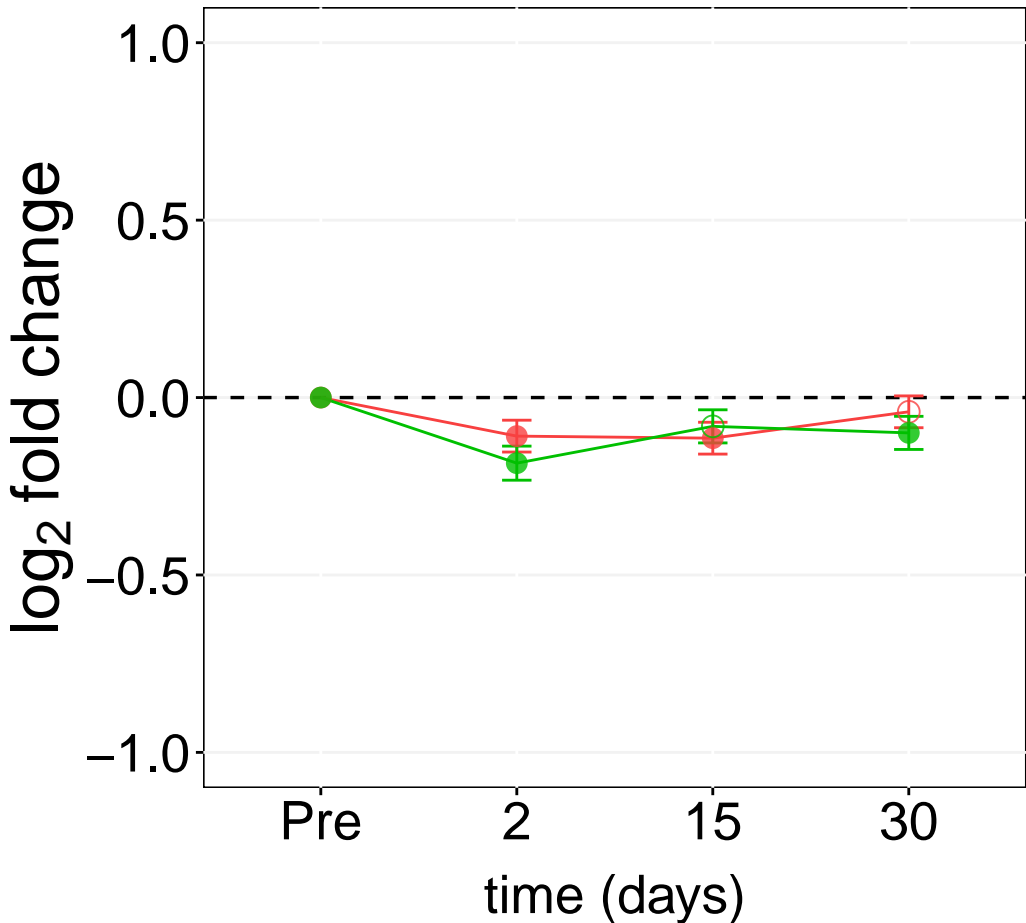

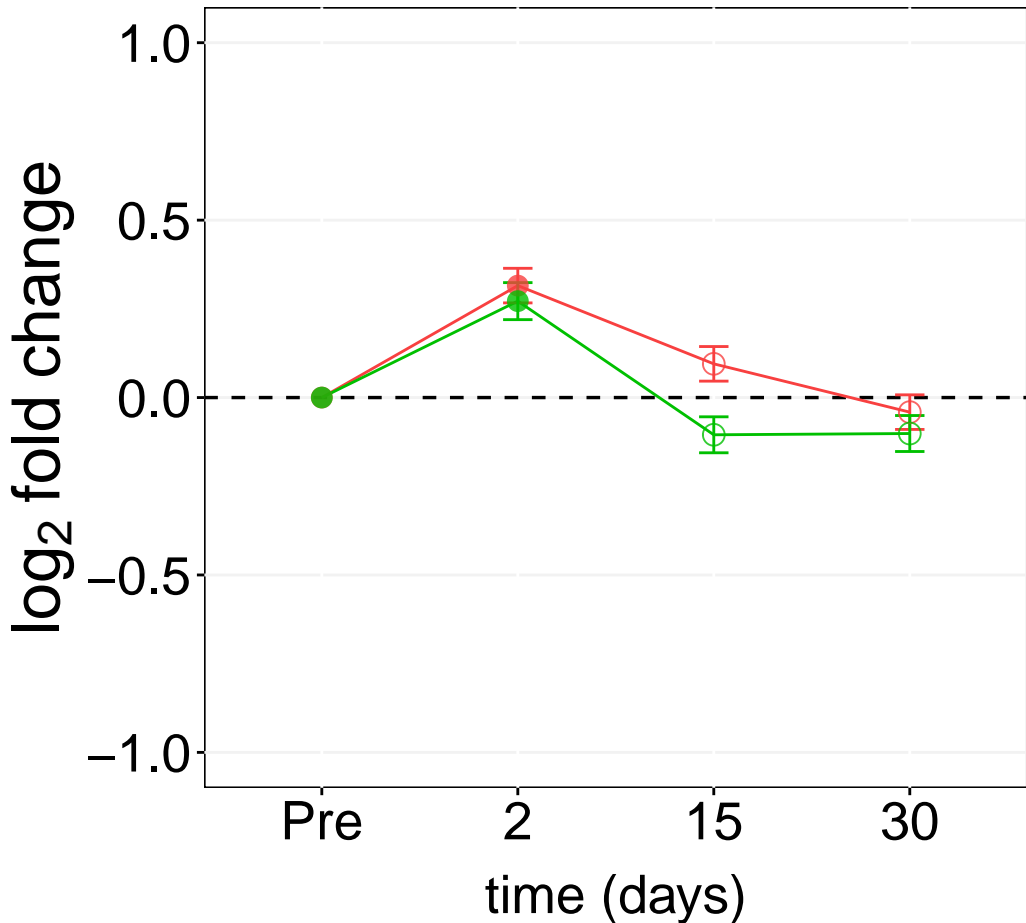

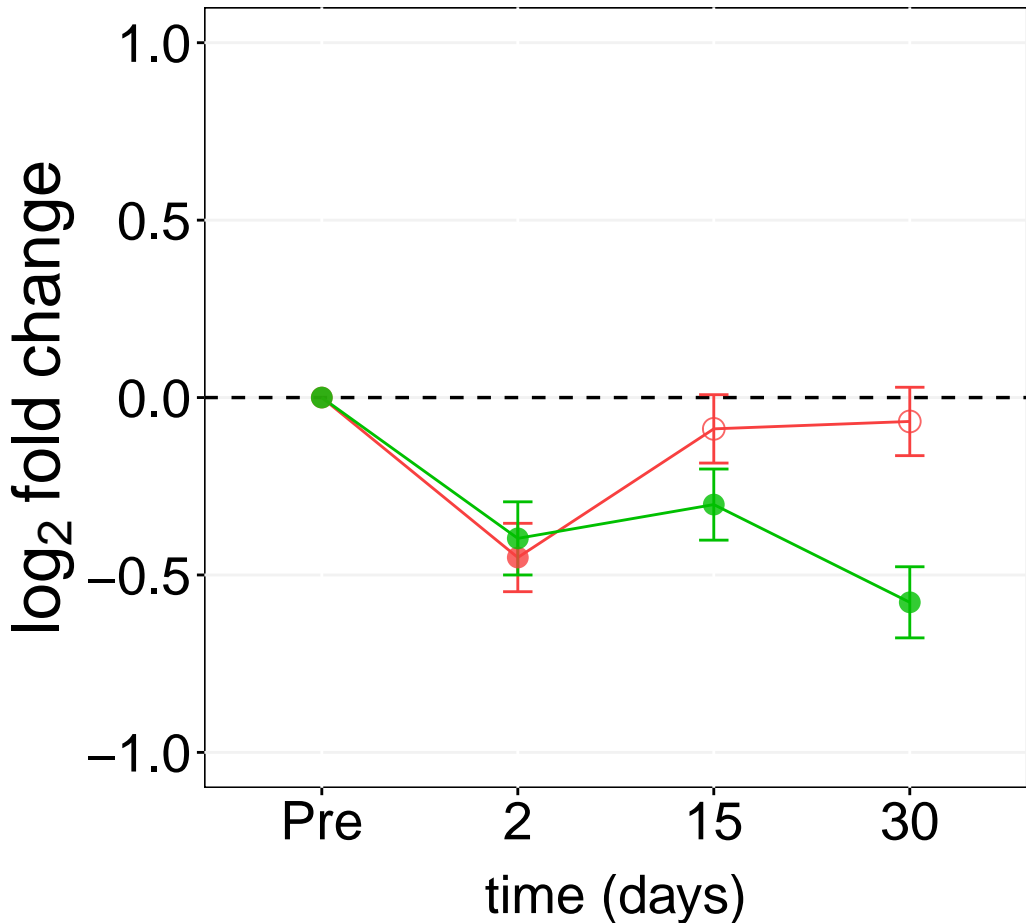

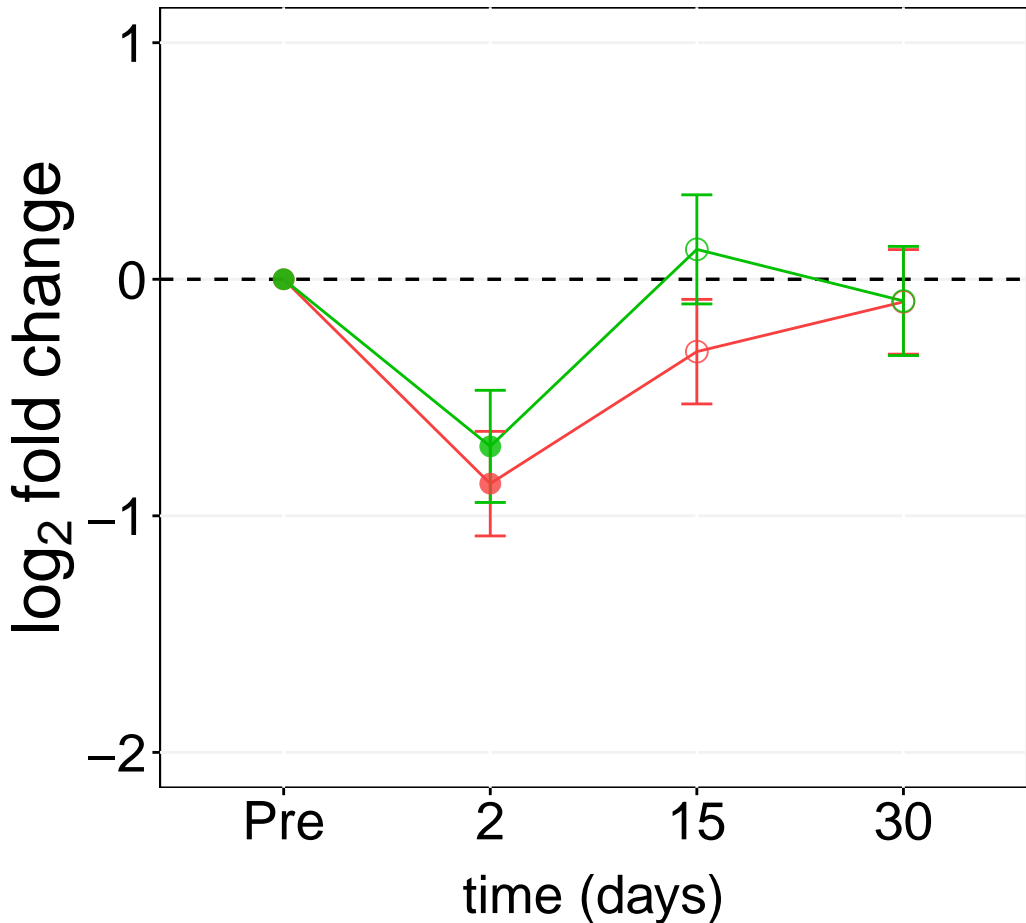

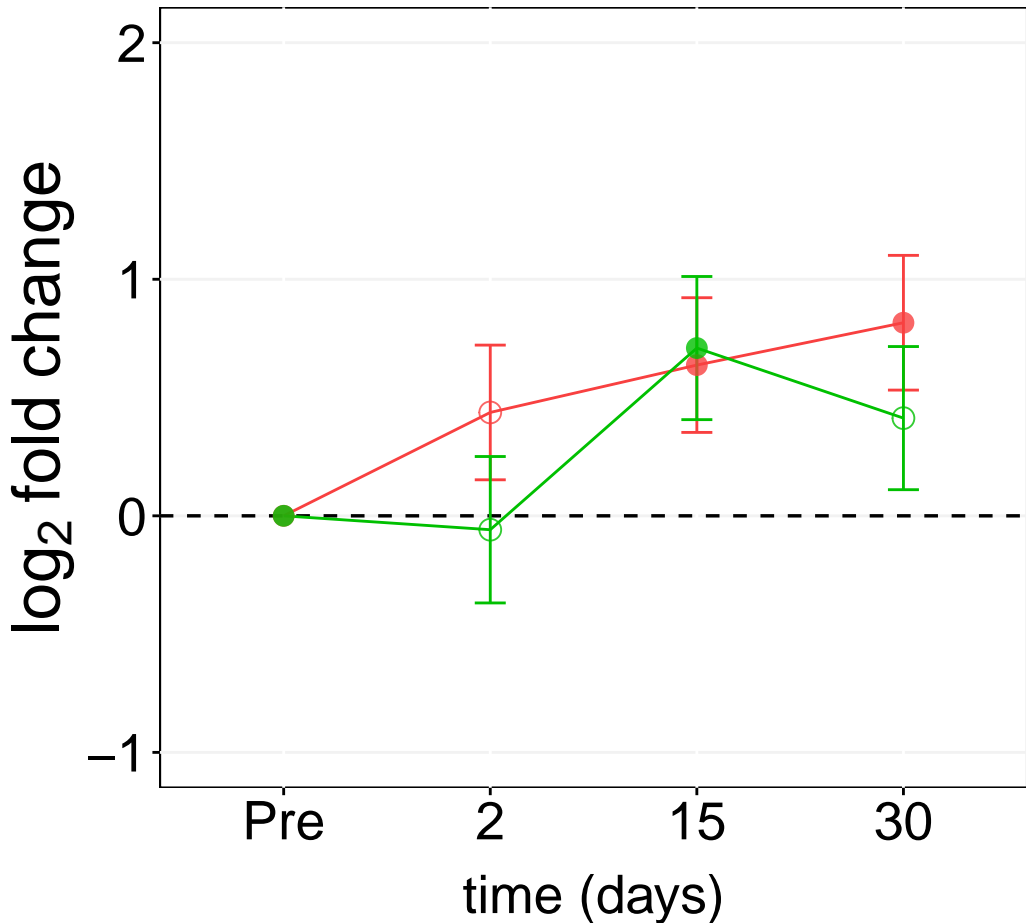

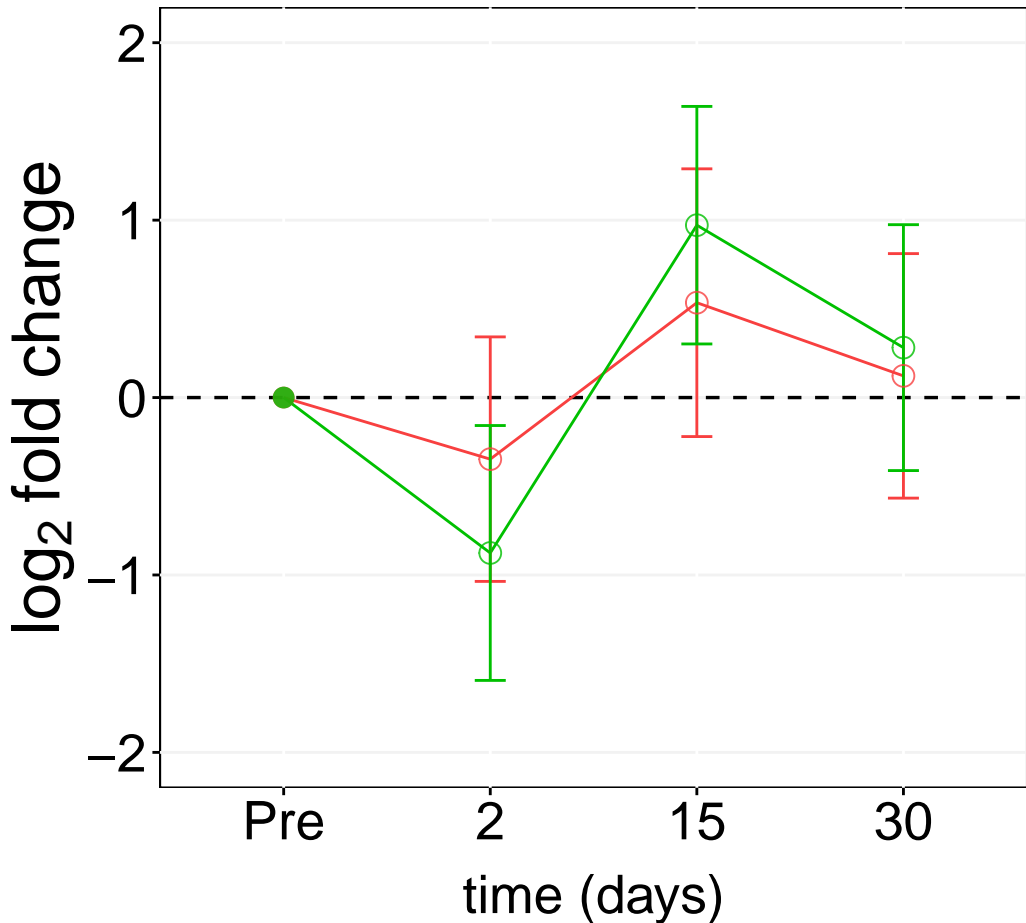

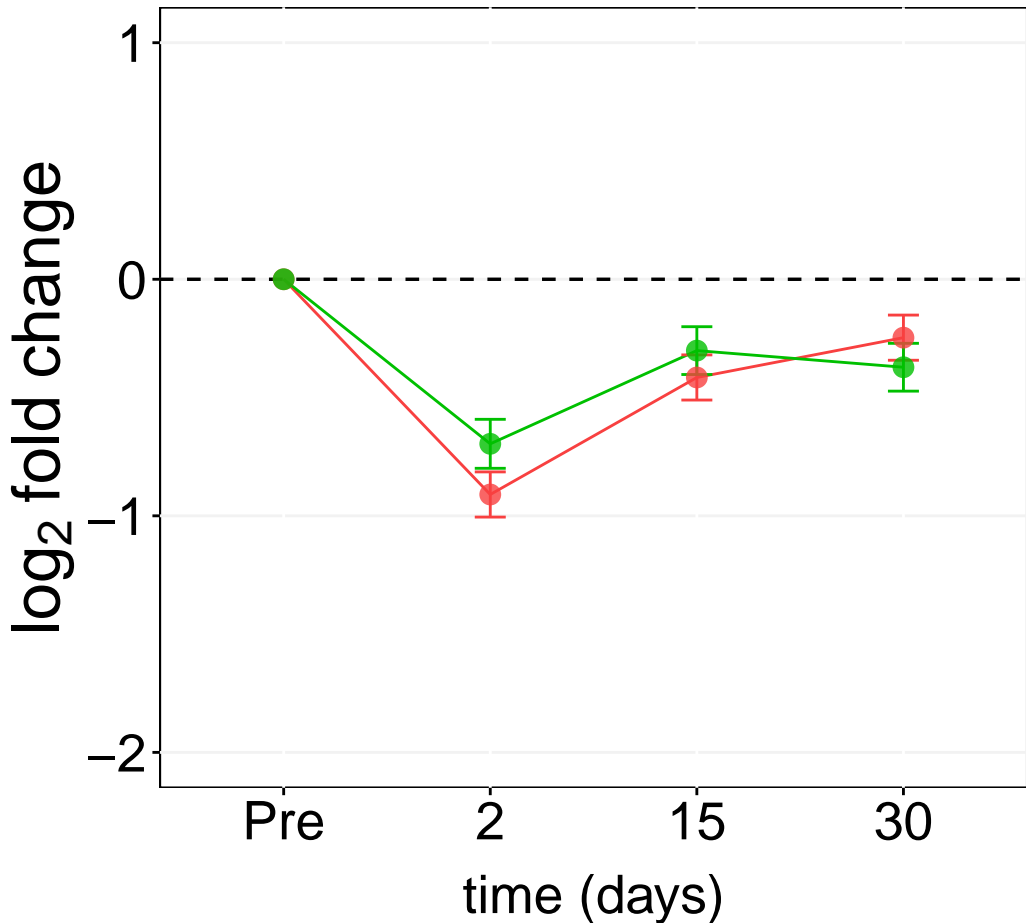



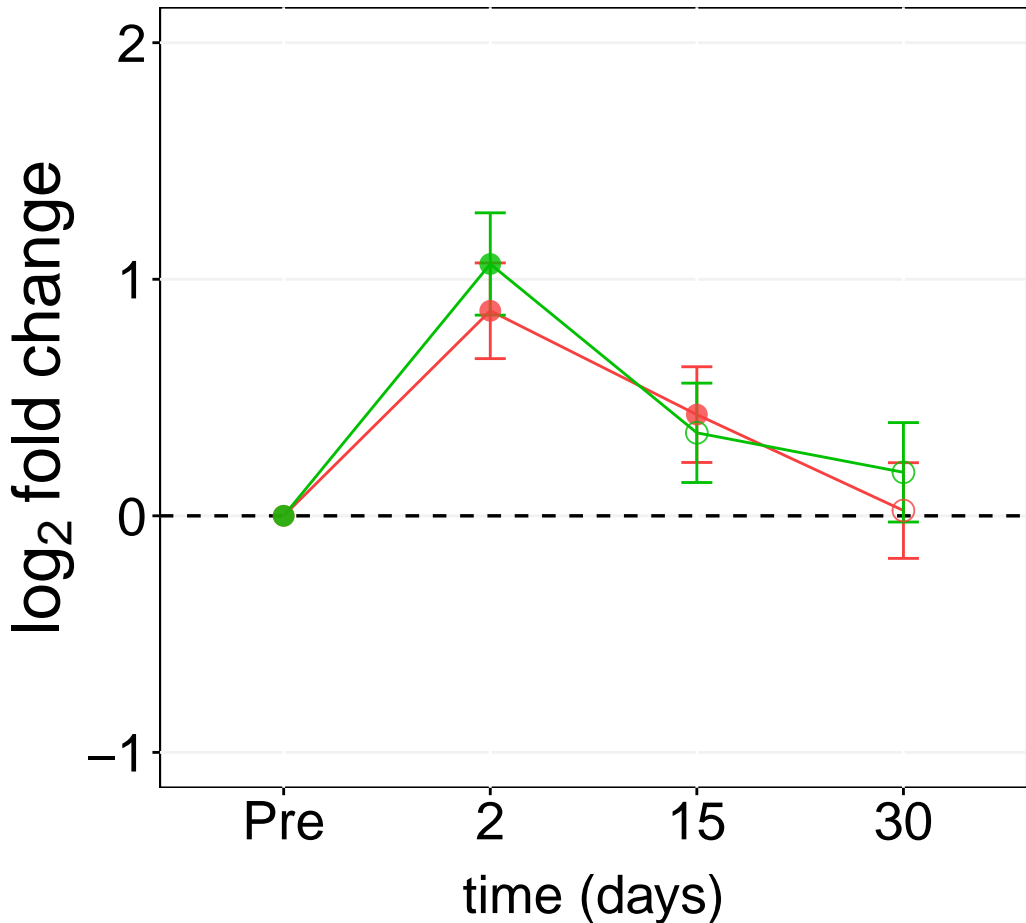

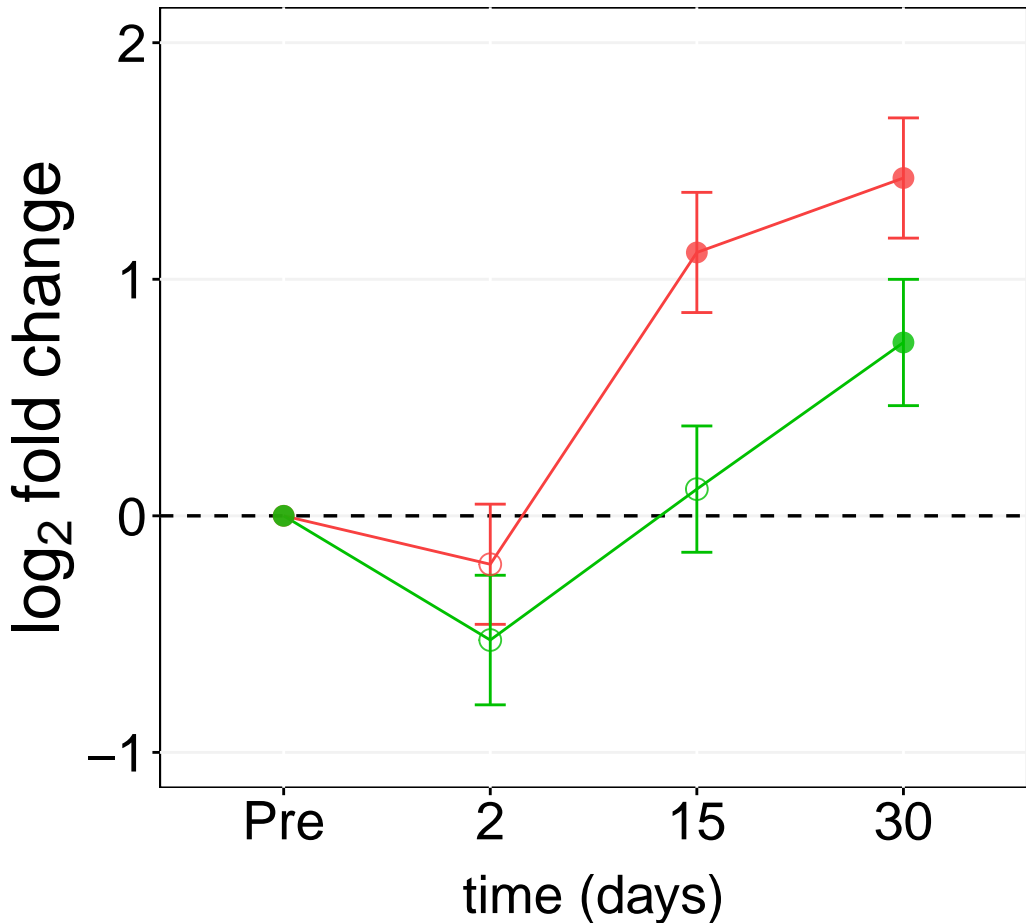

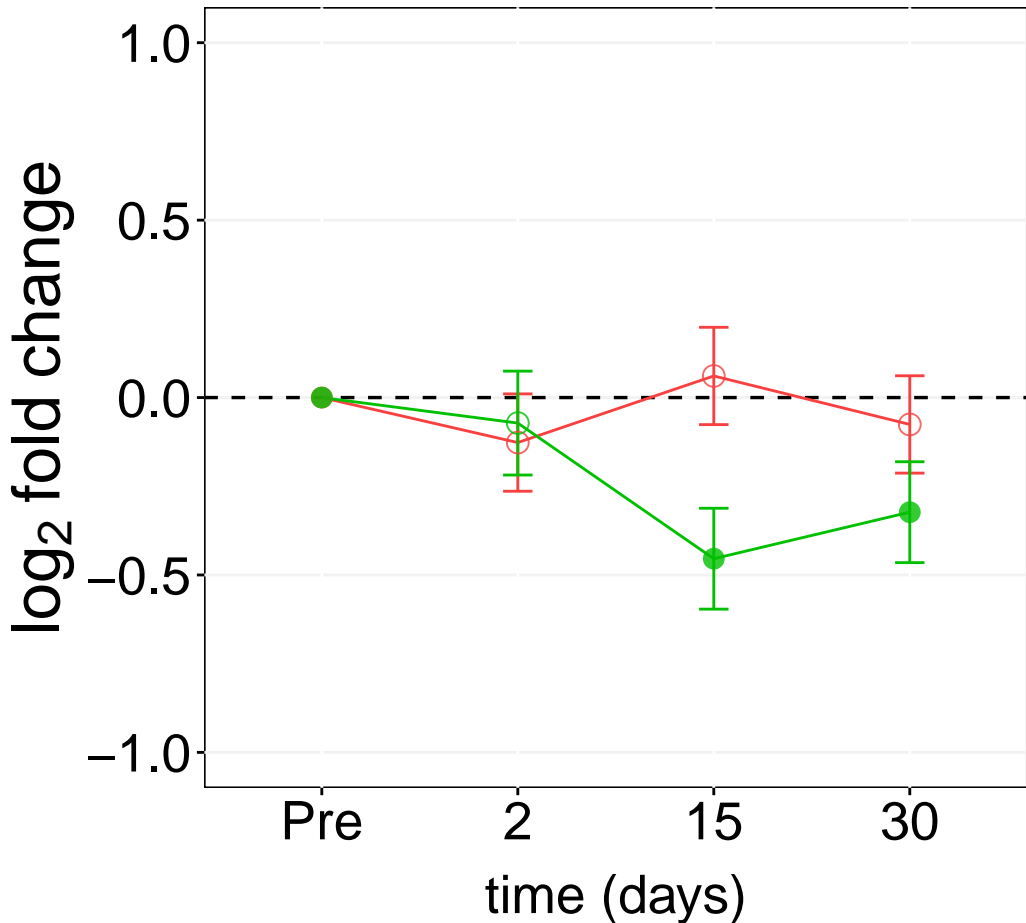

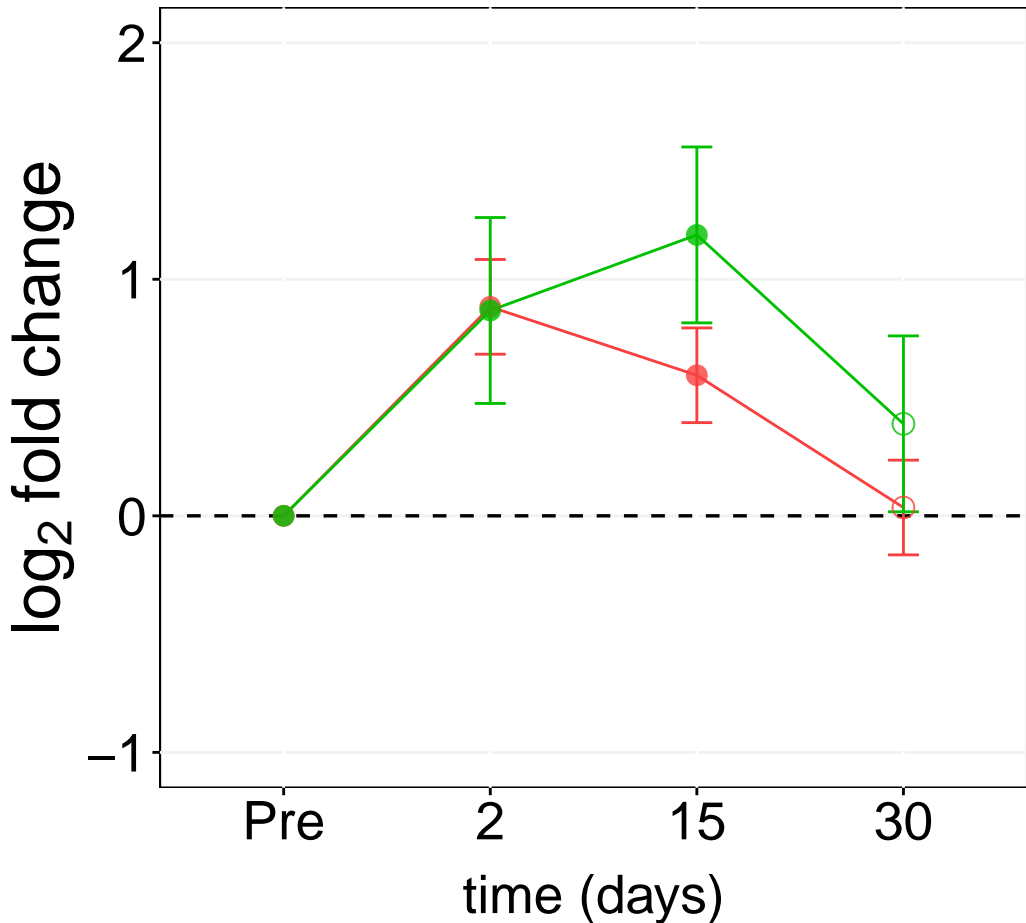

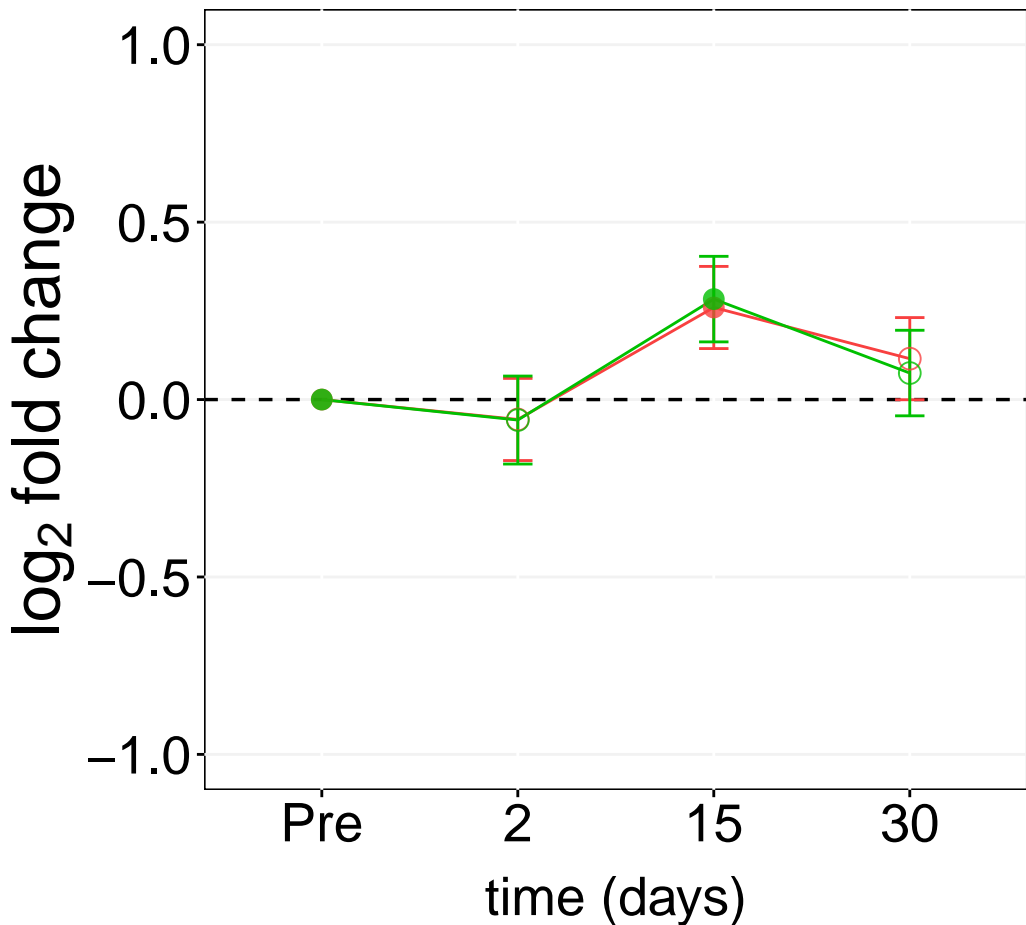

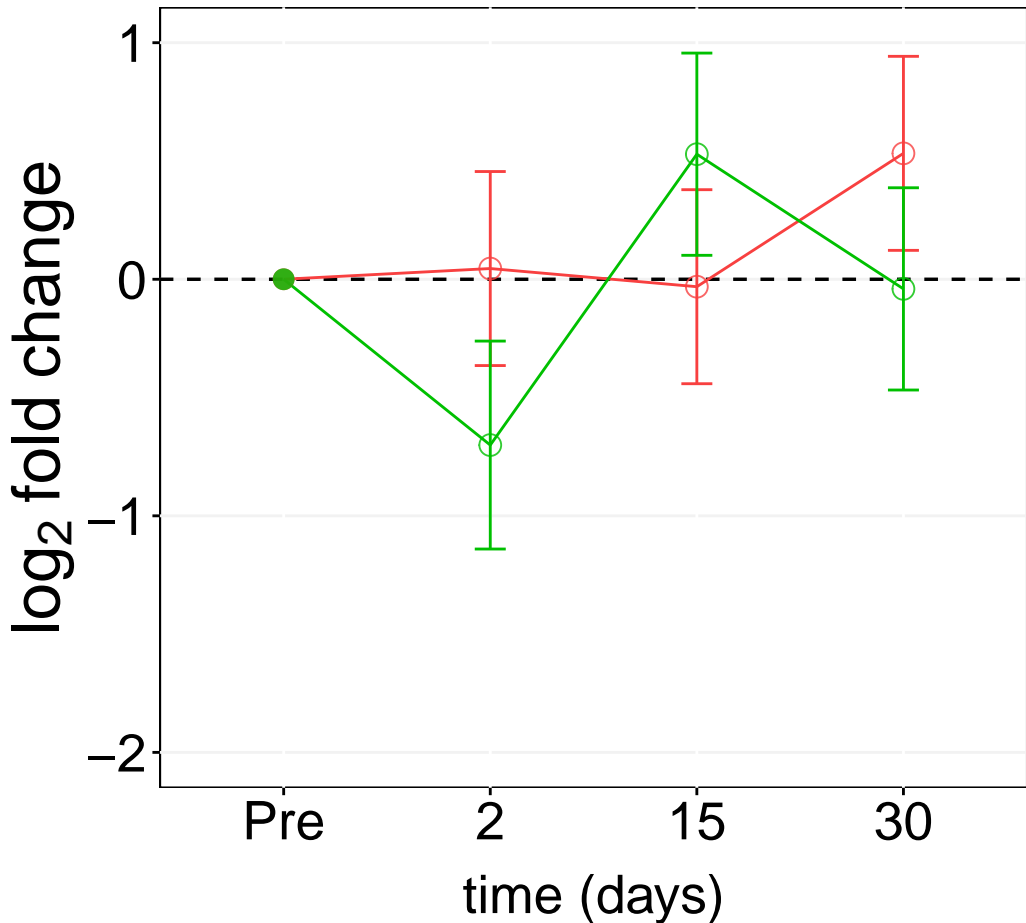

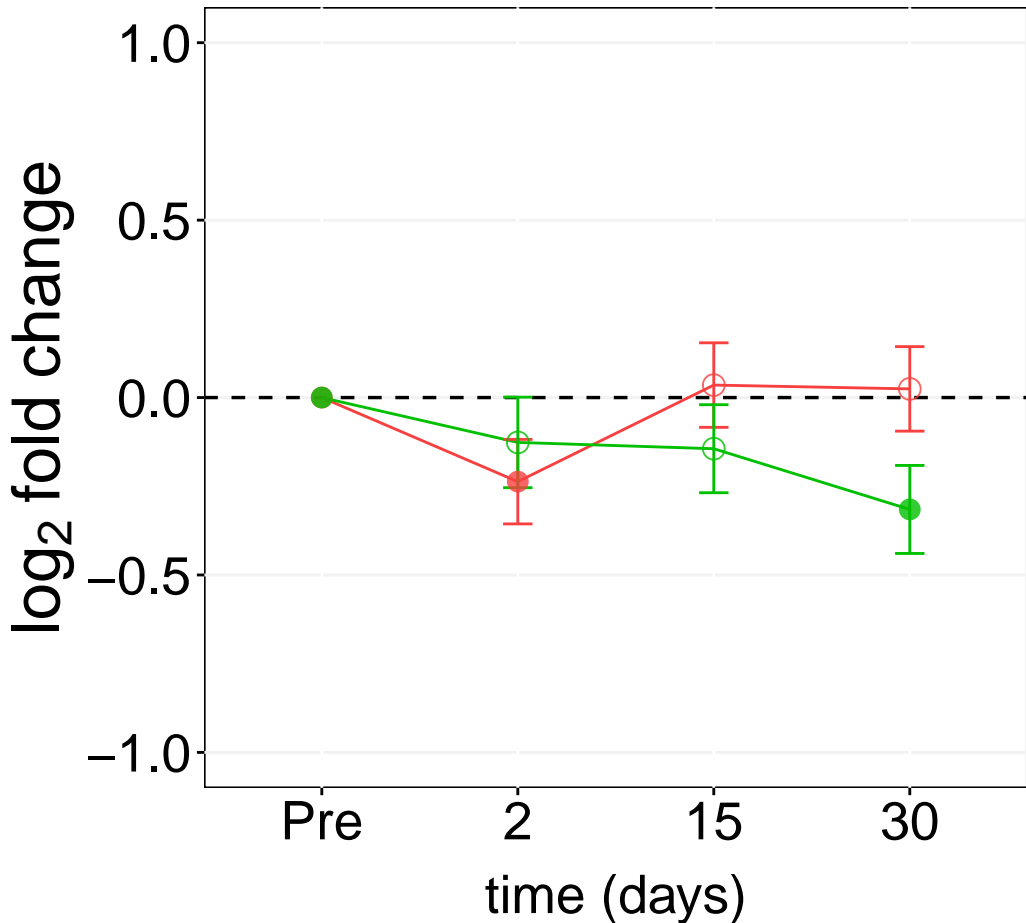

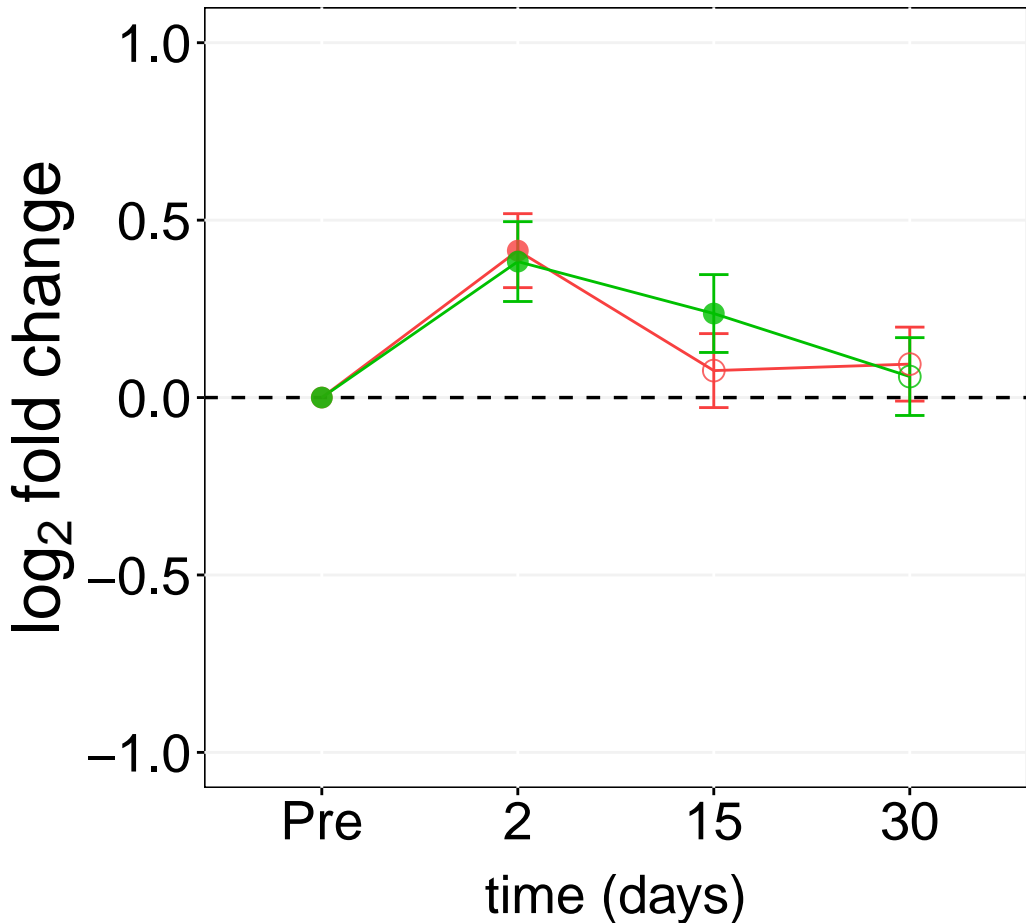



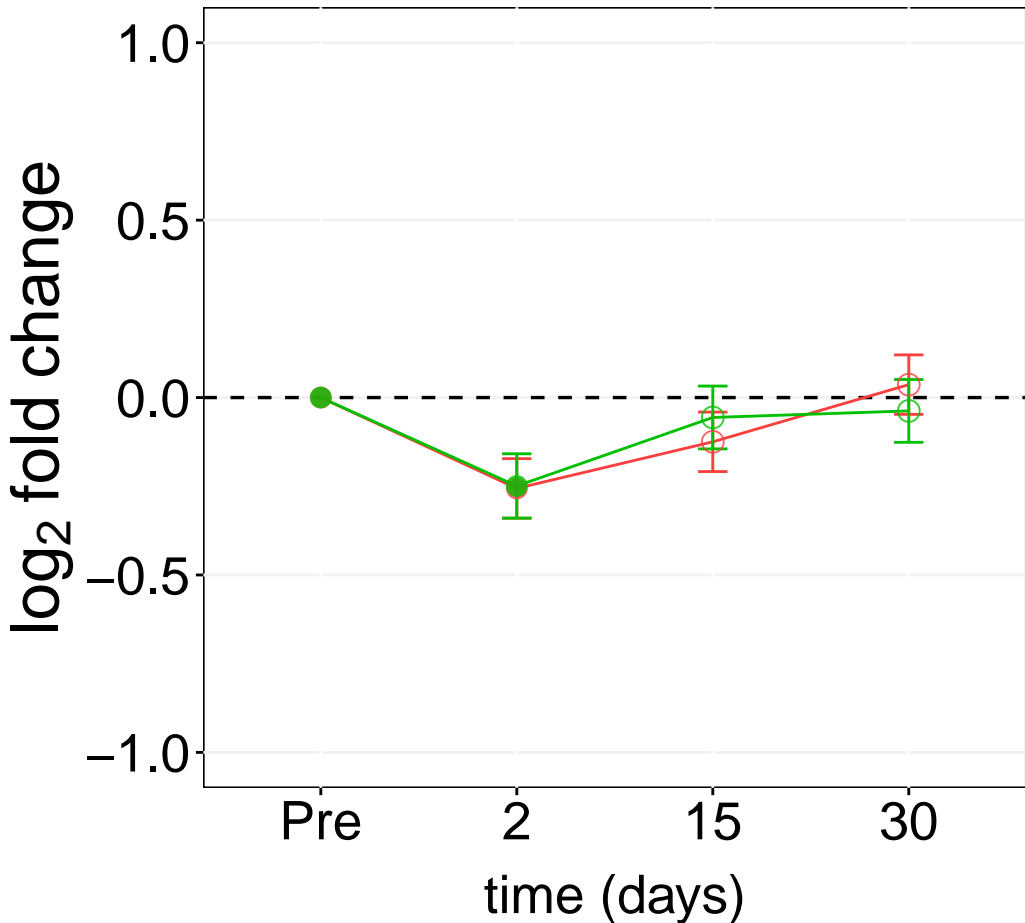

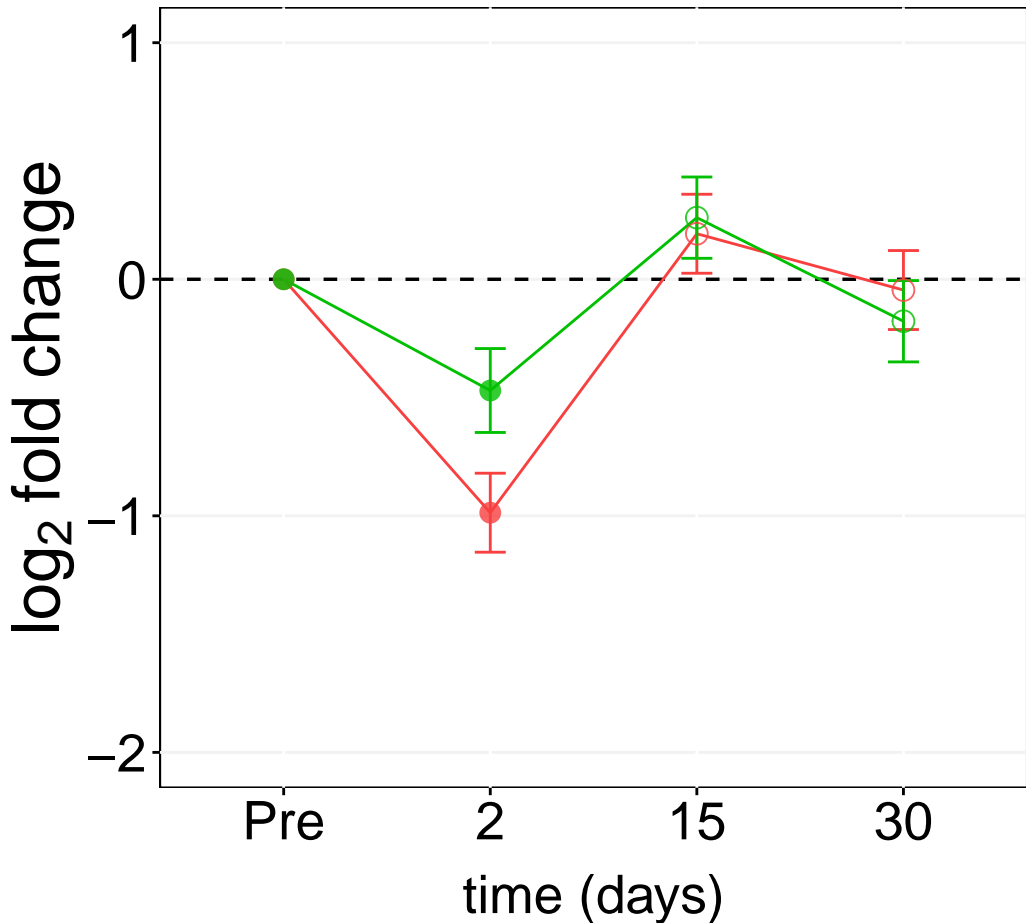

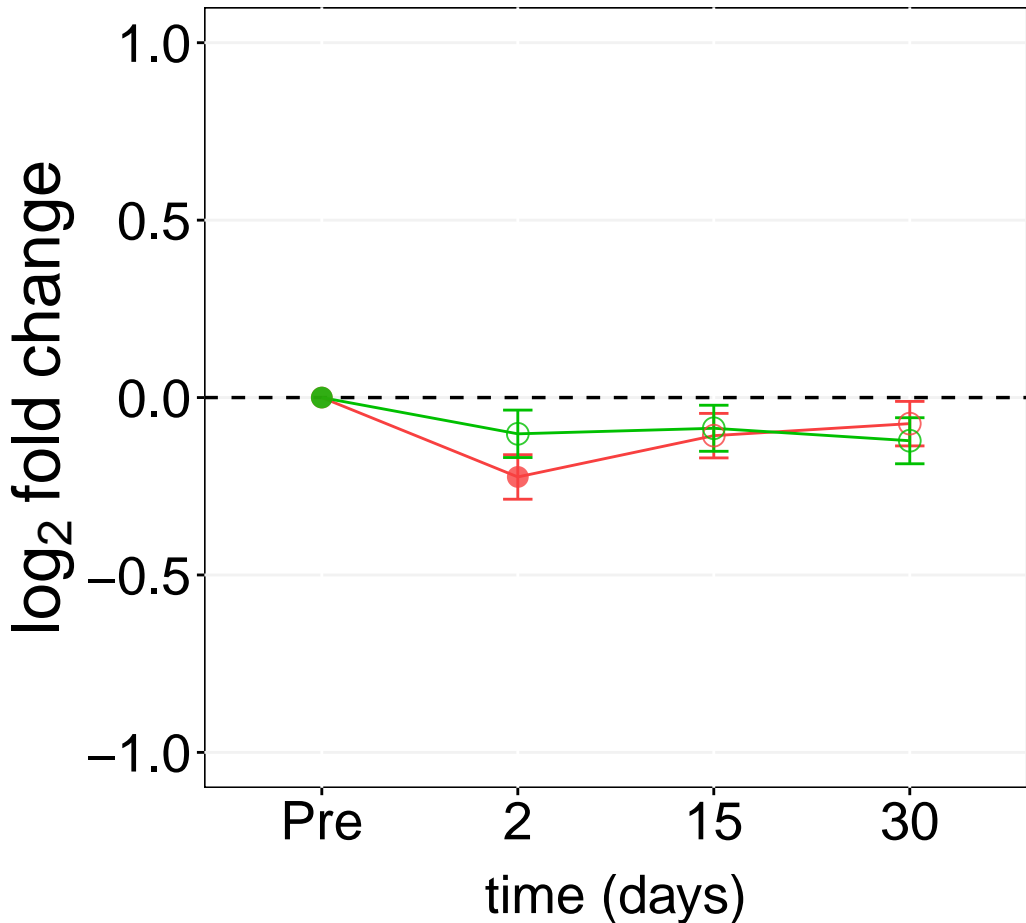

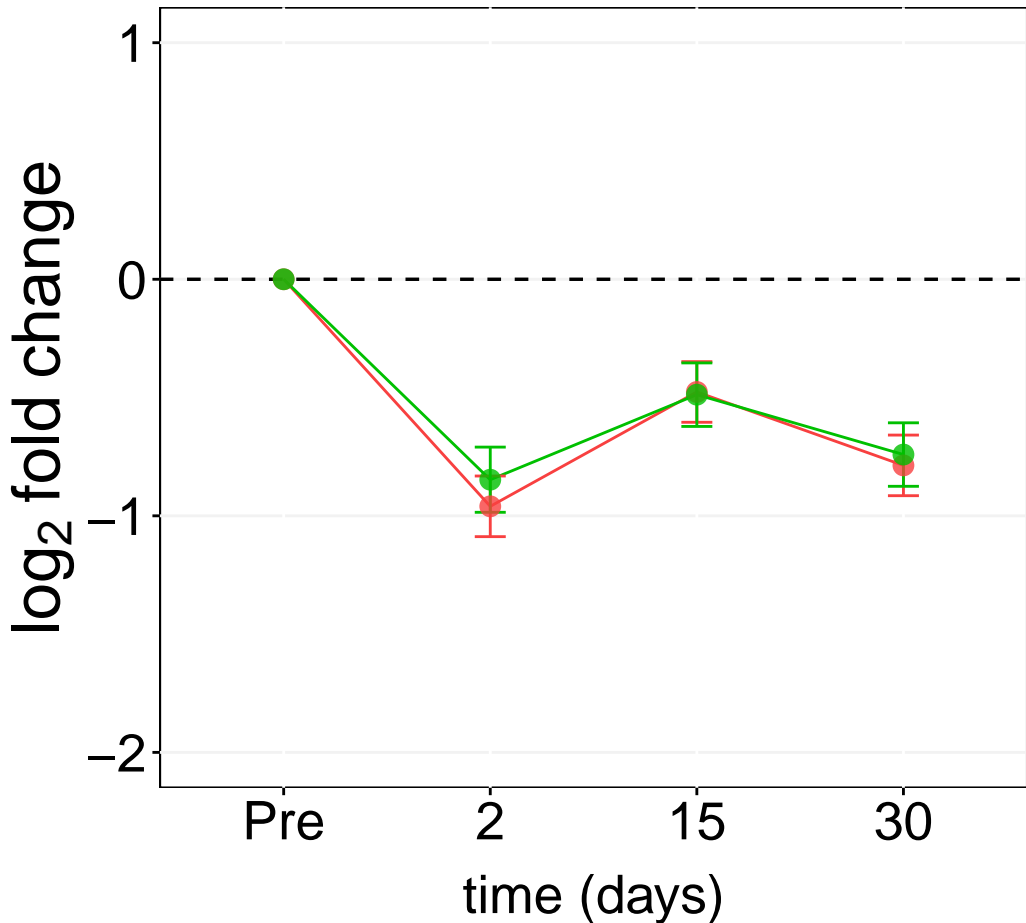

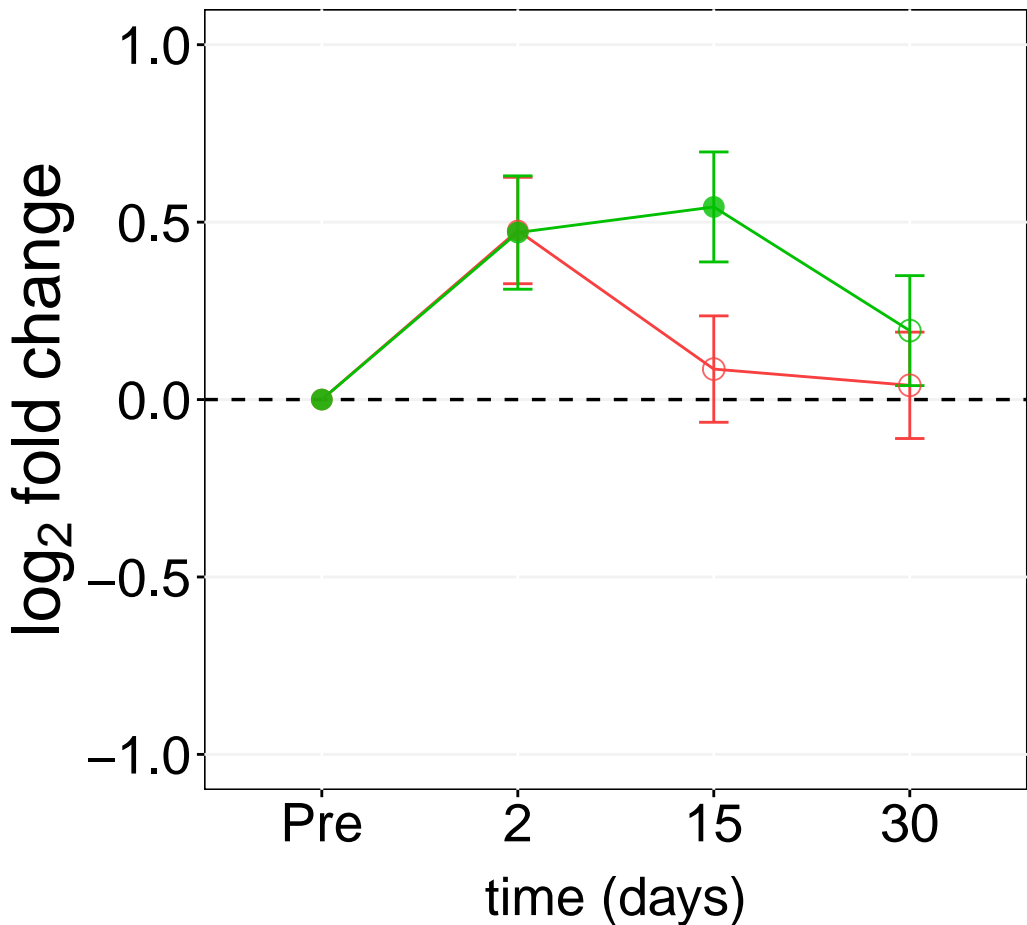

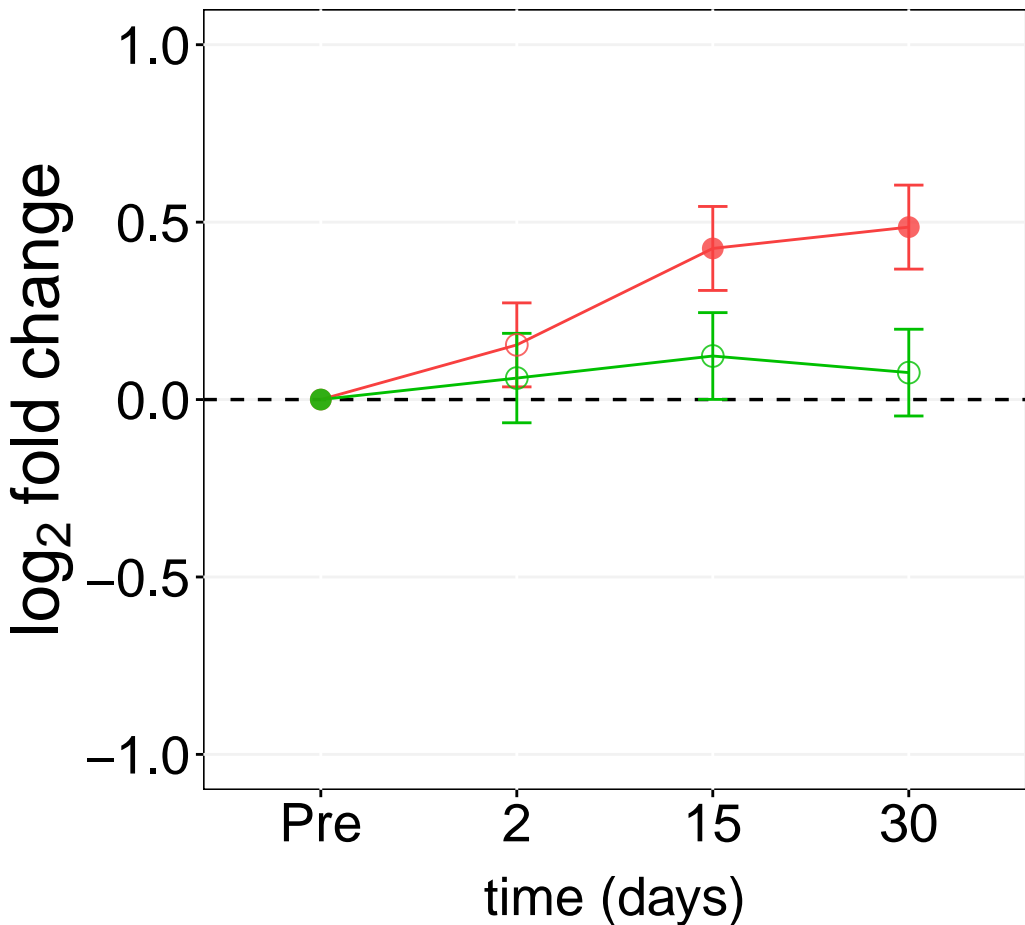

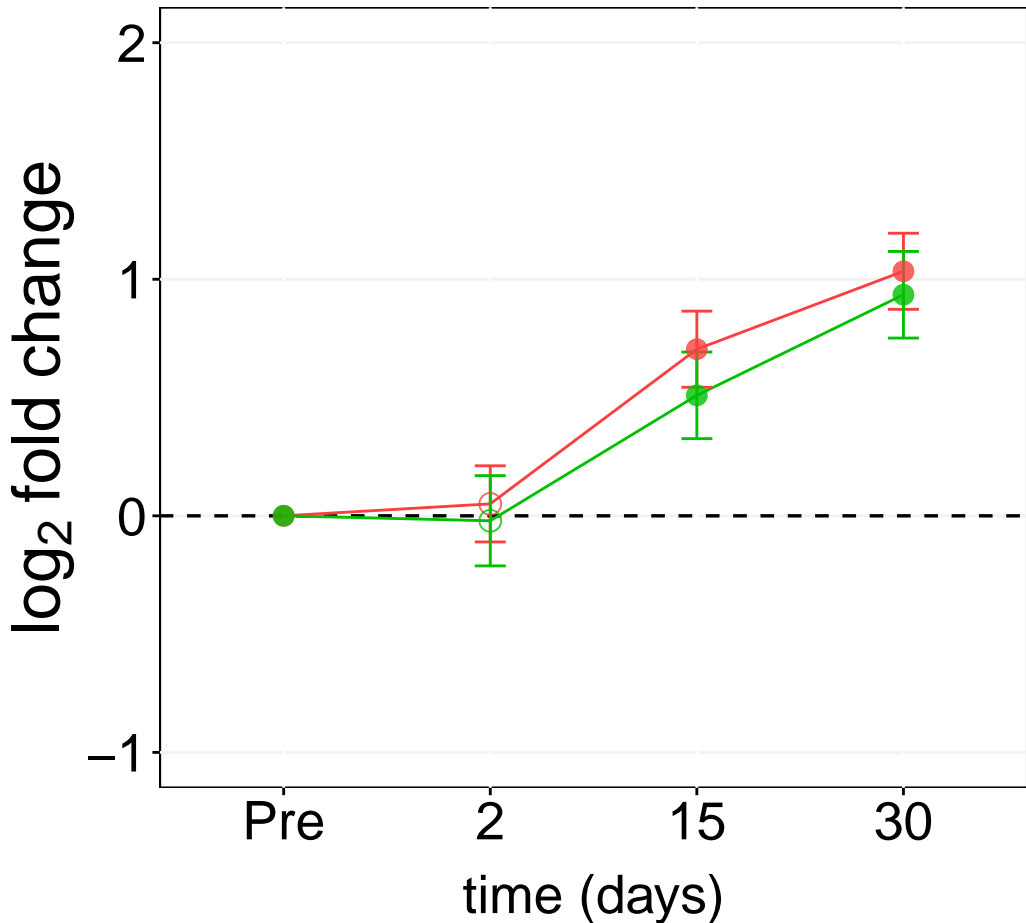

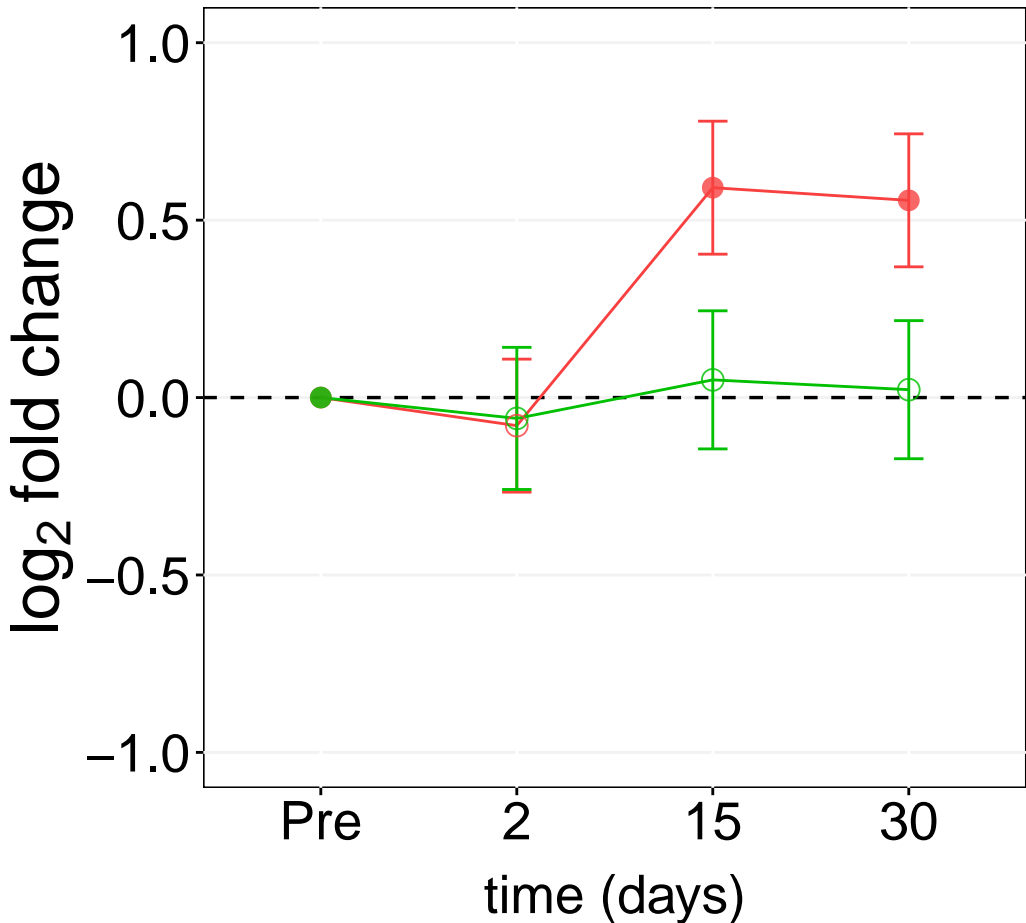



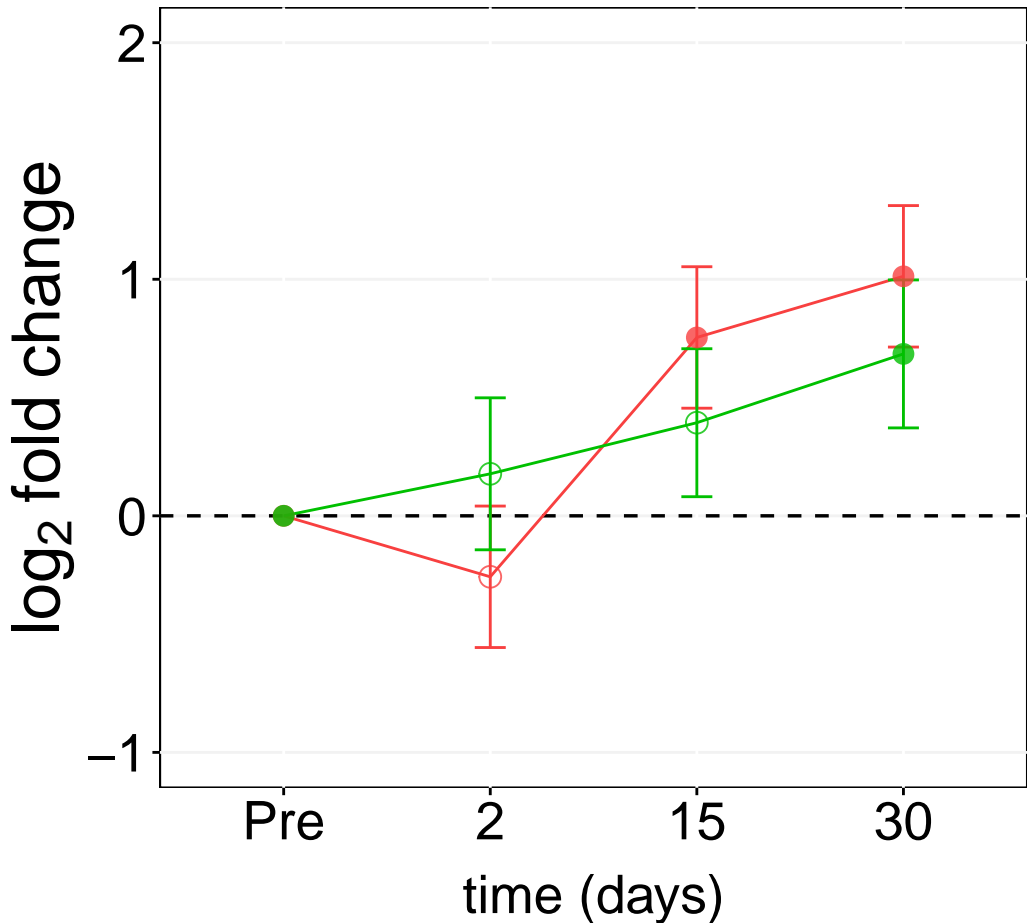

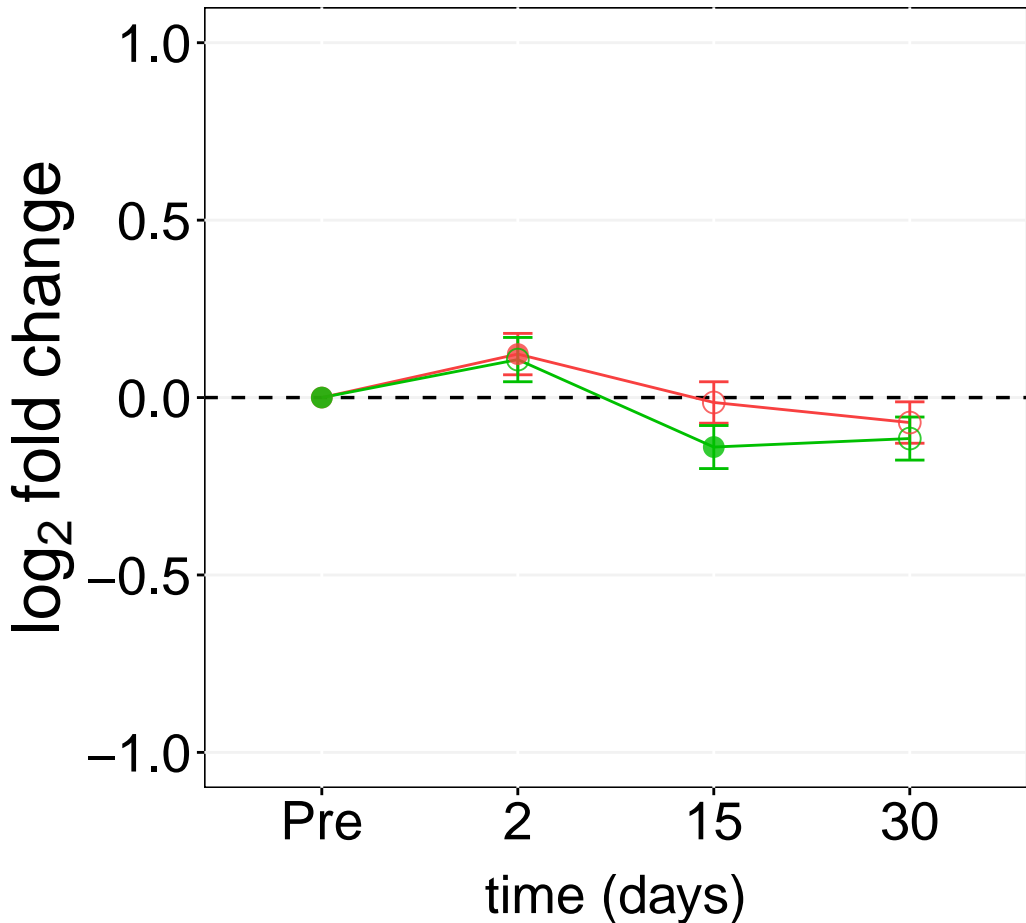

$\log_2$  fold change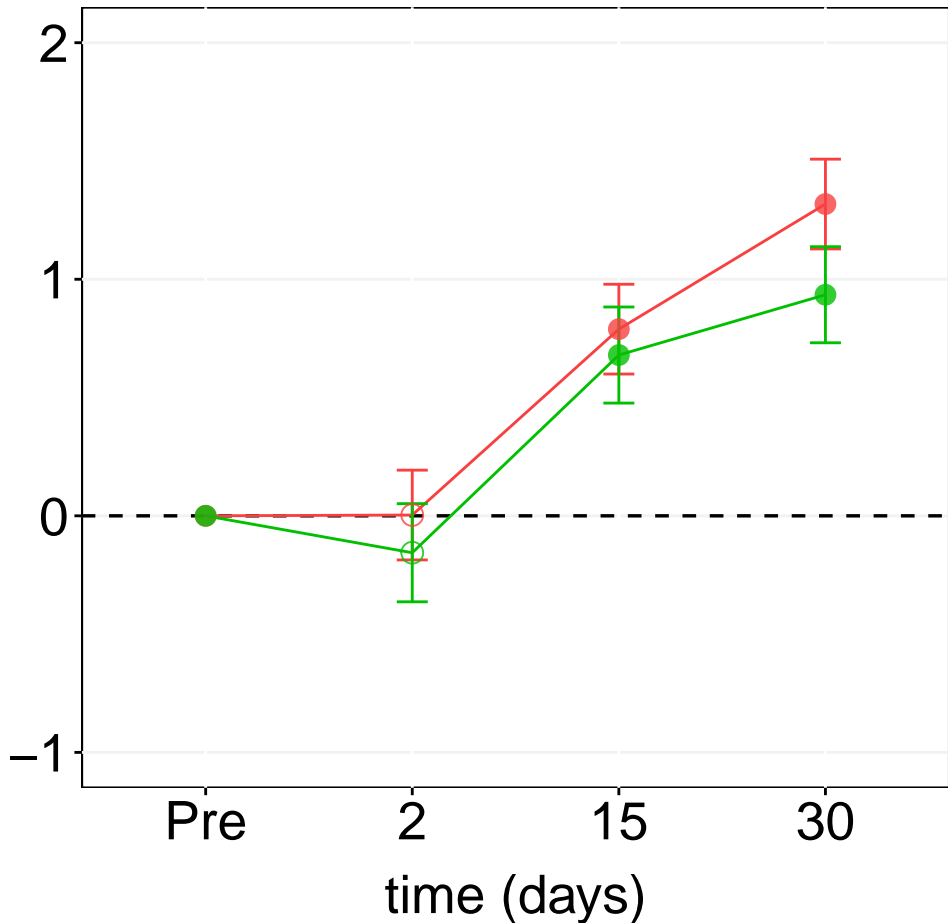

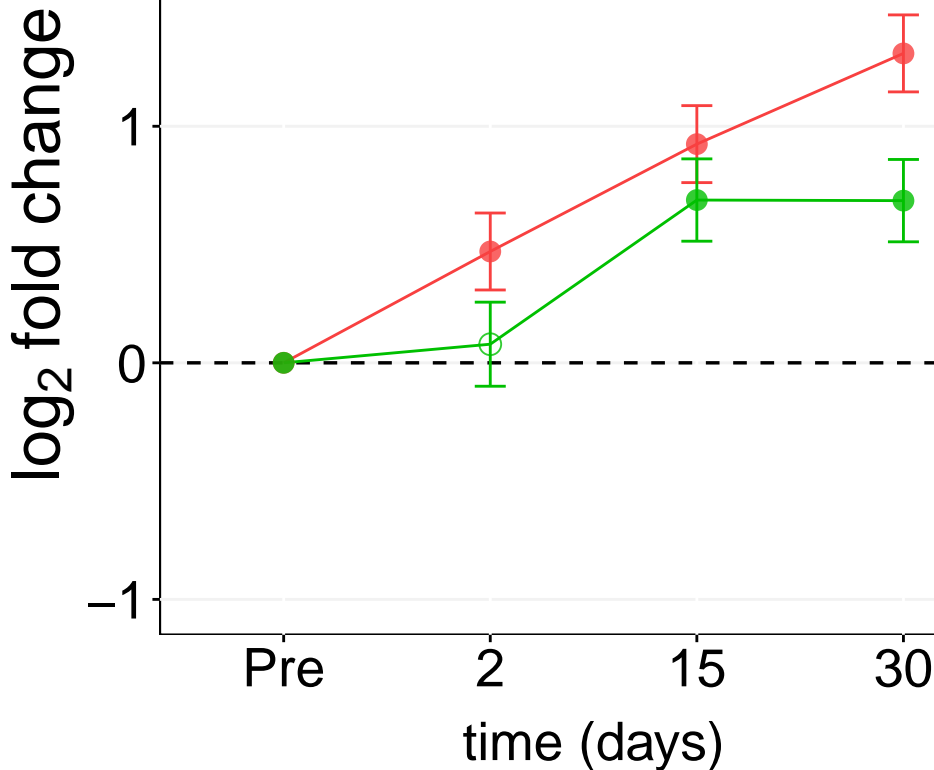

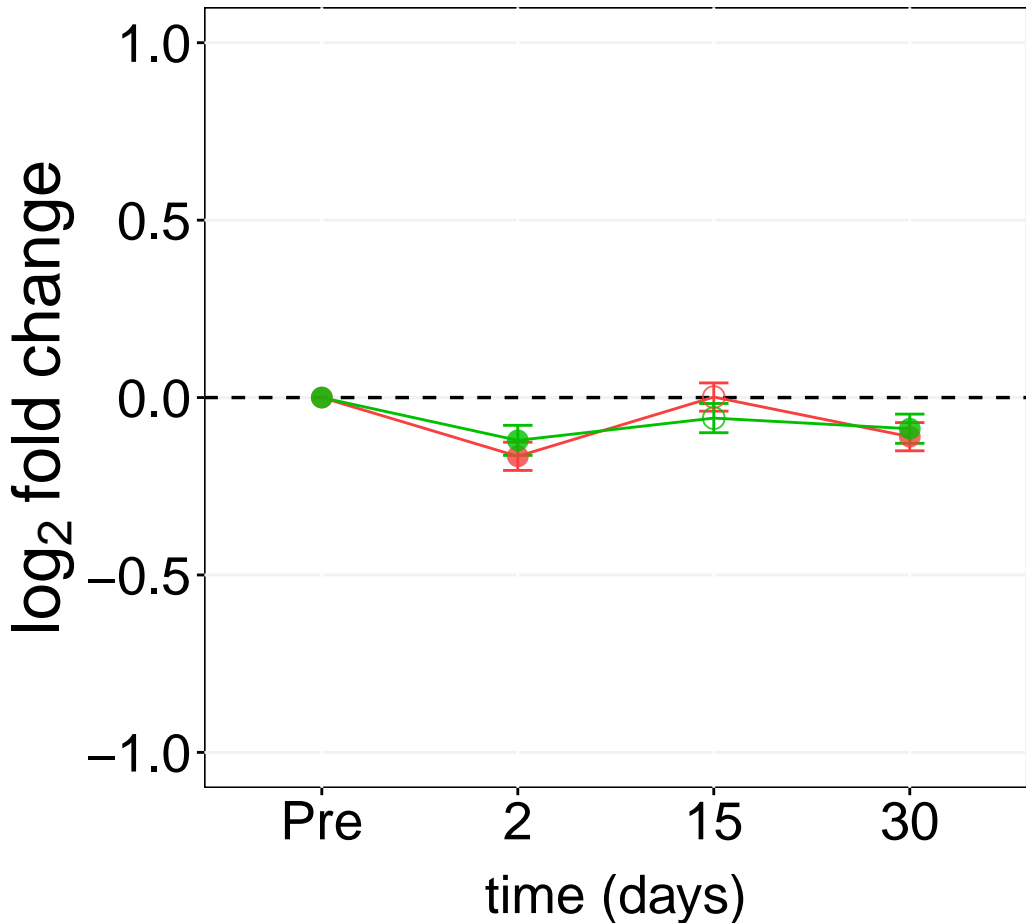

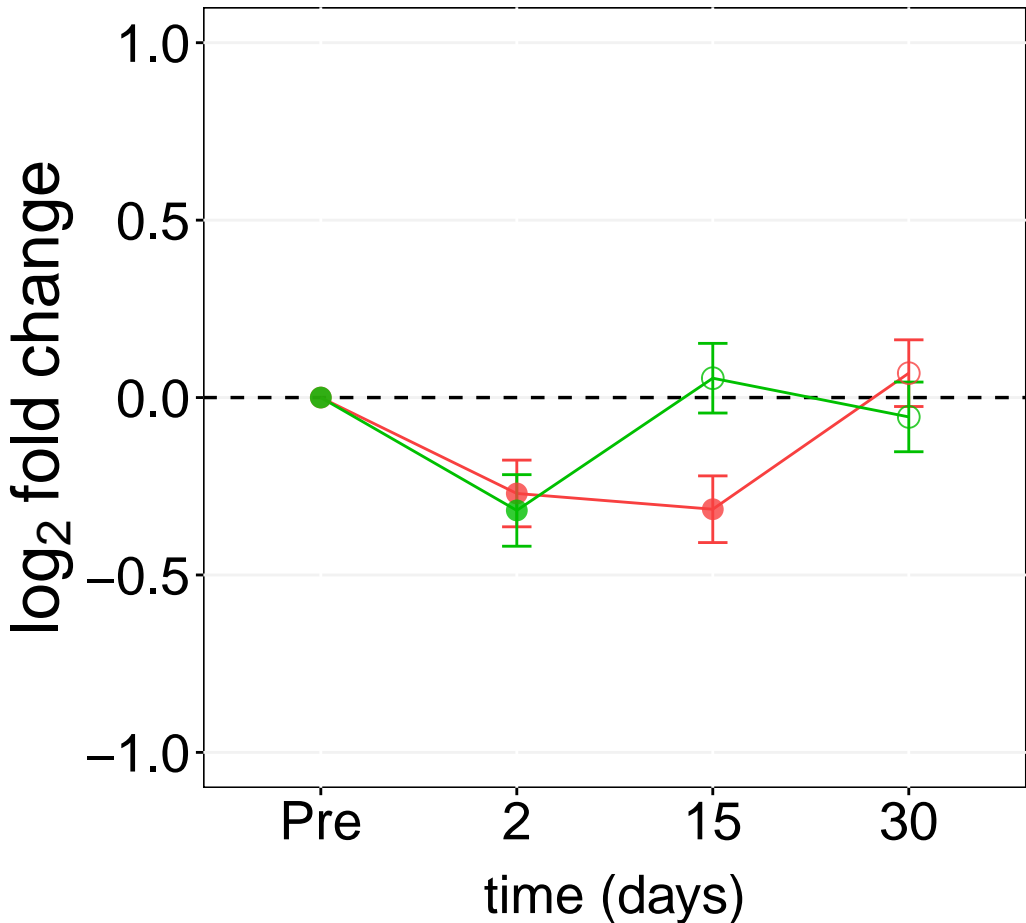

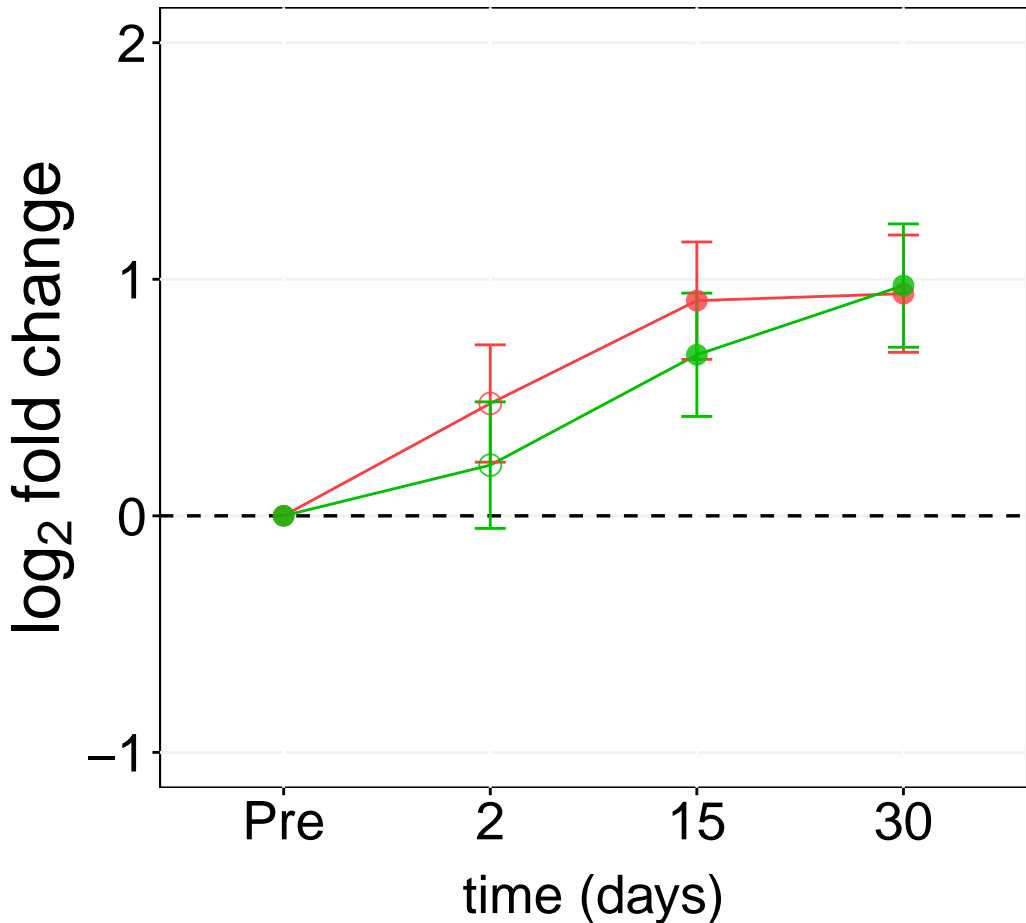

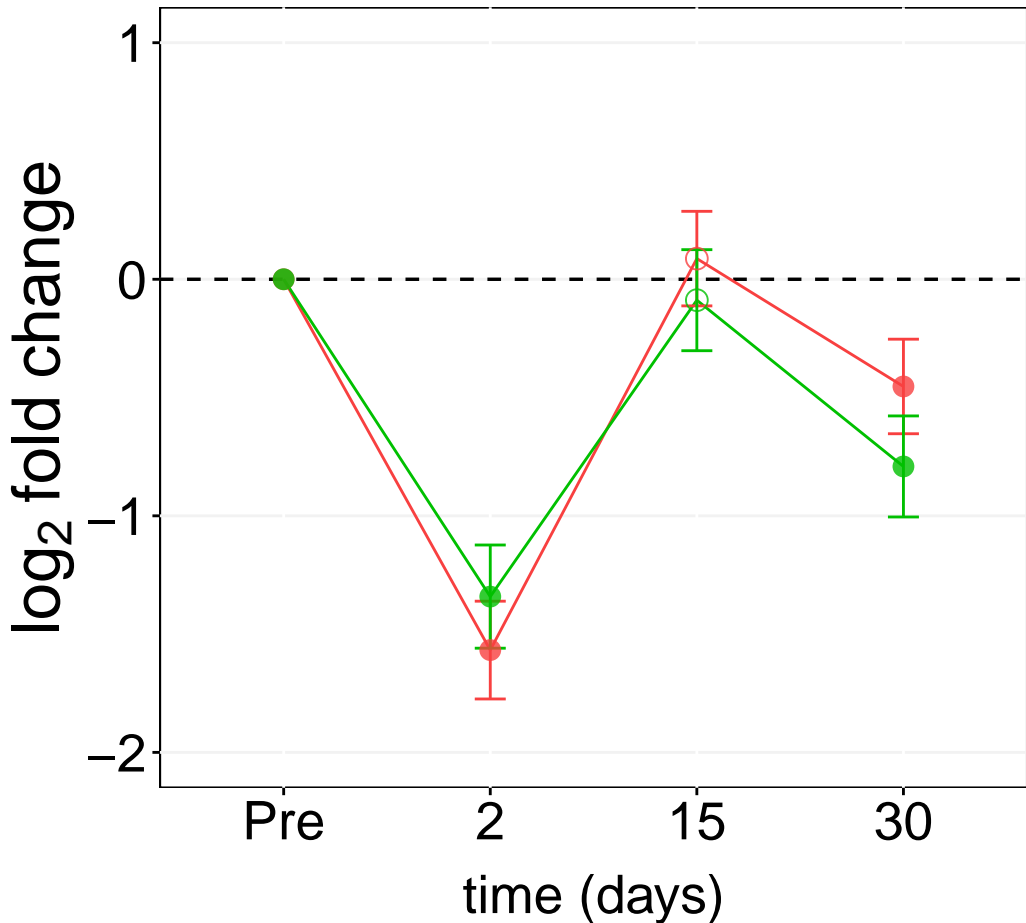



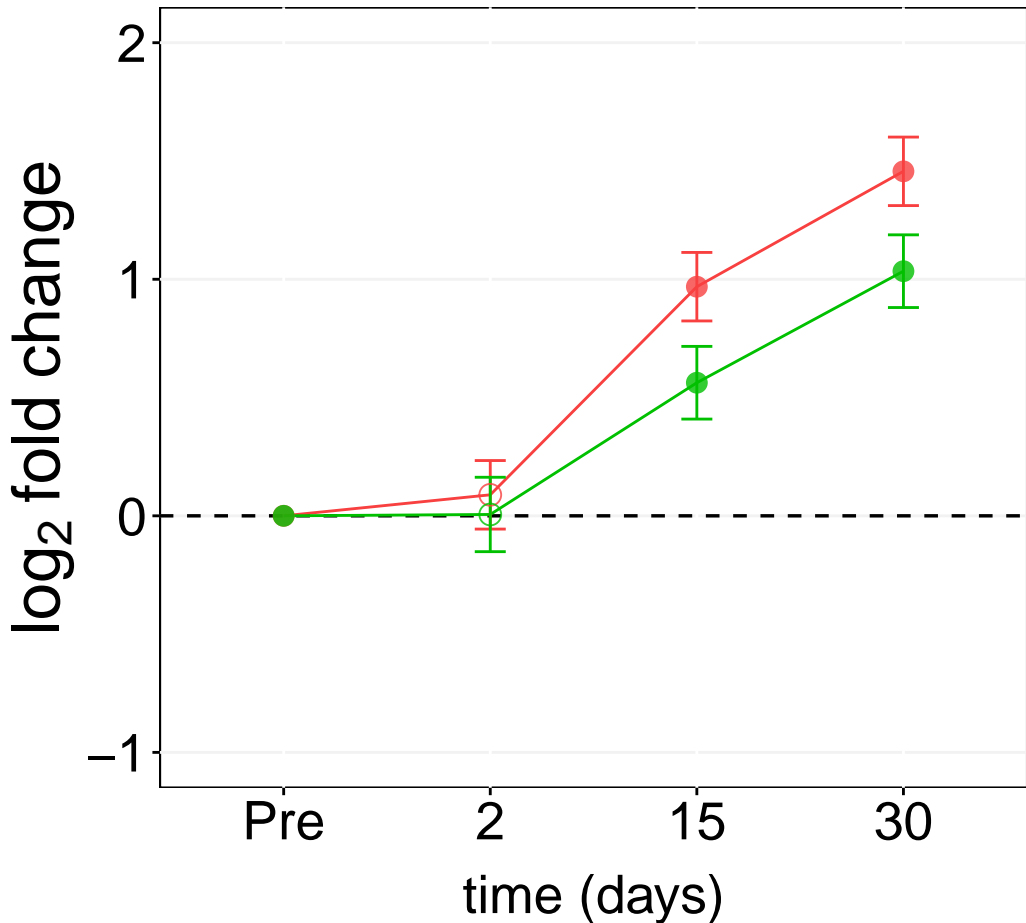

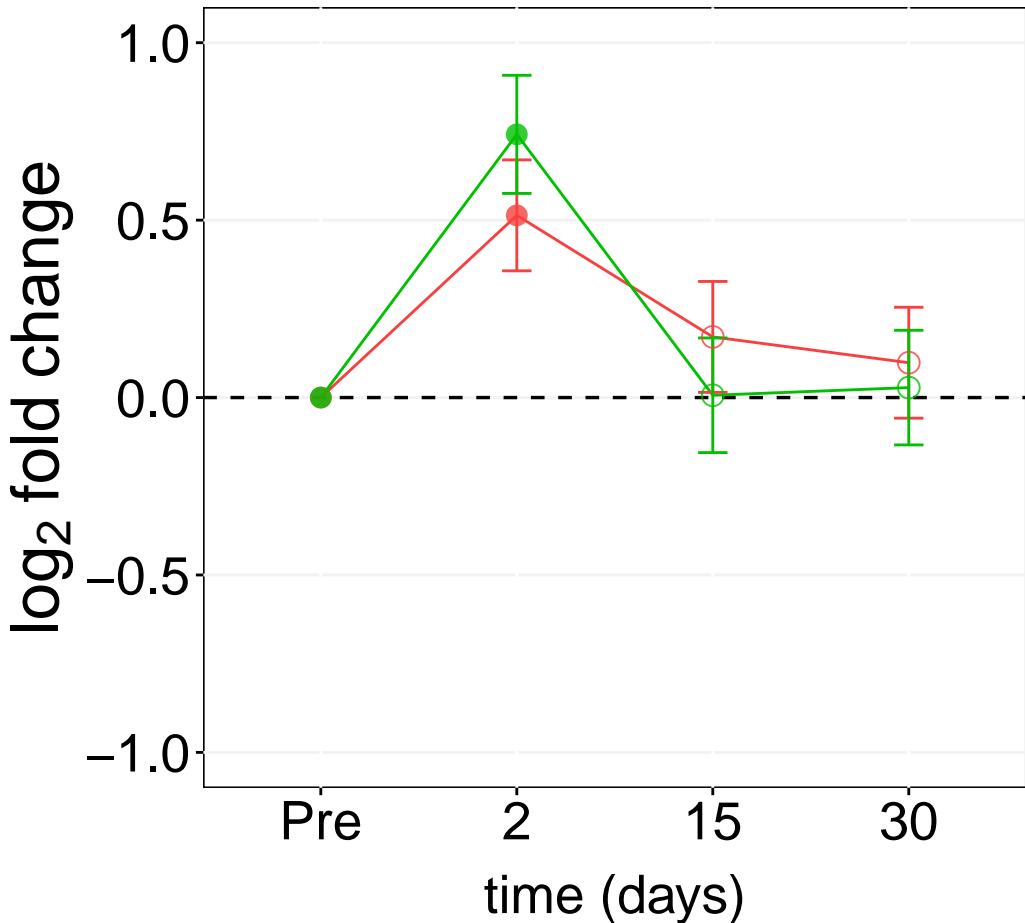

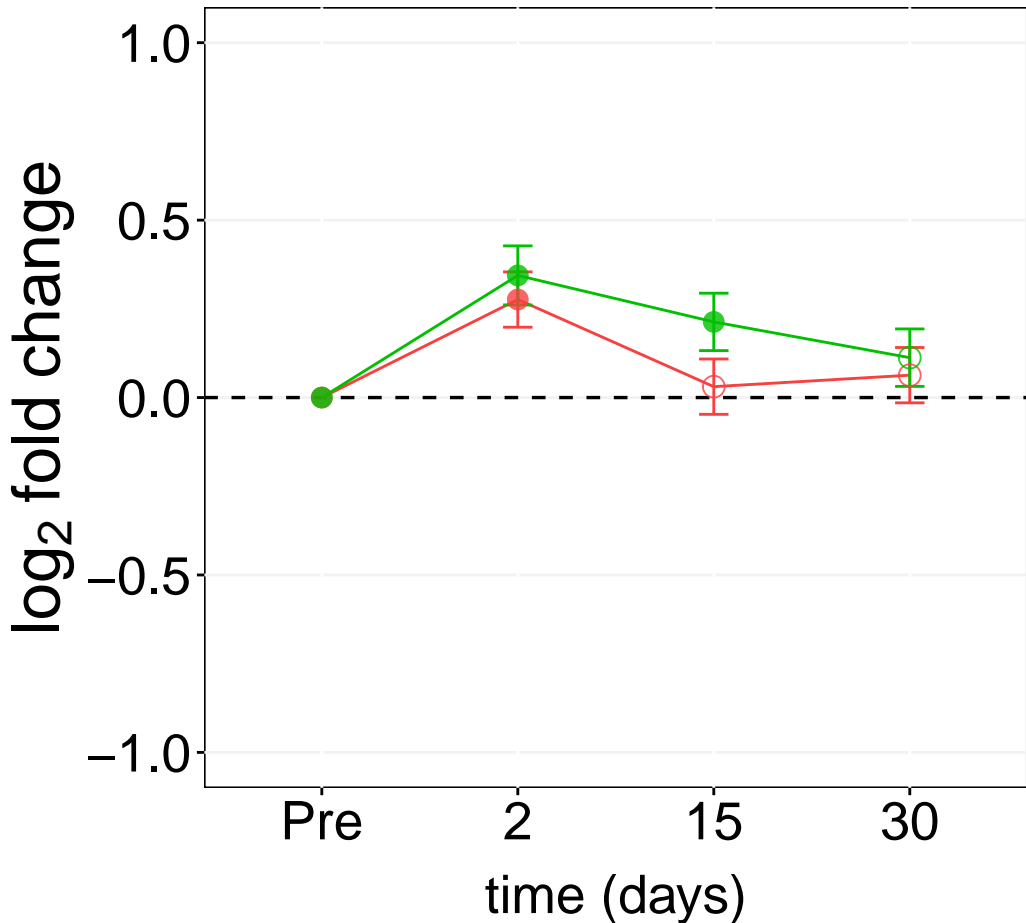

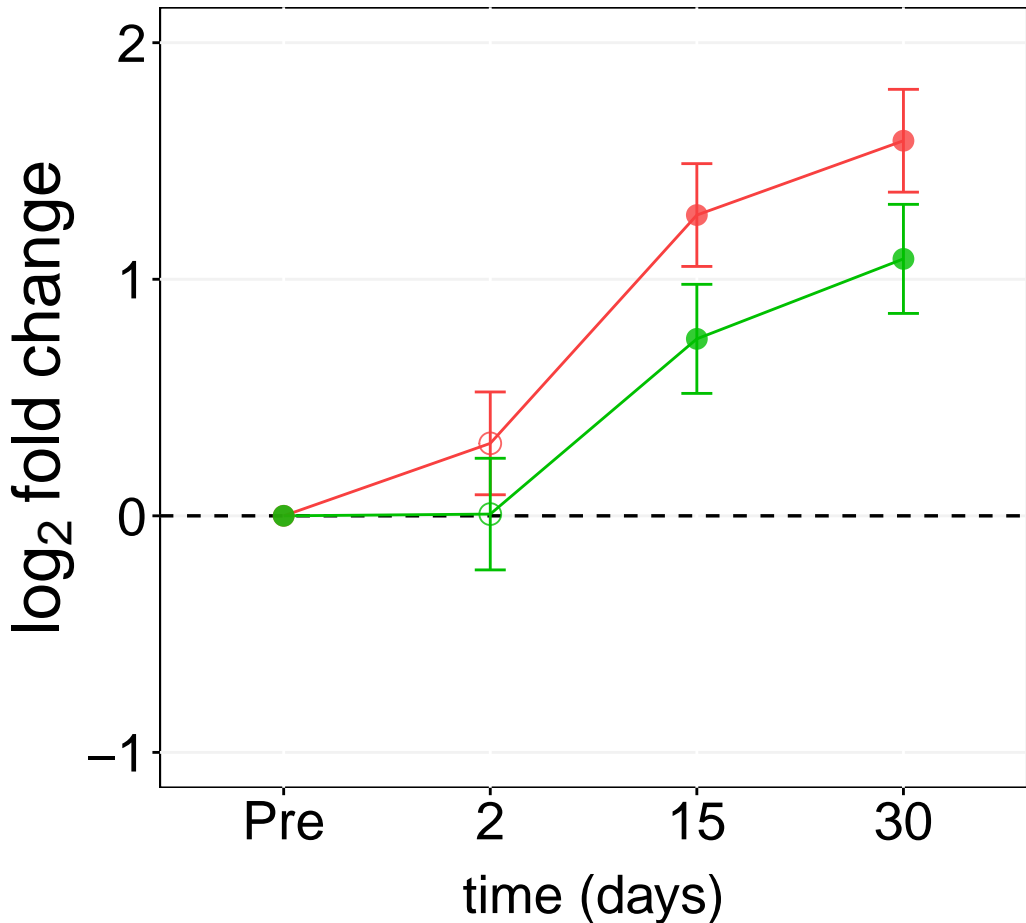

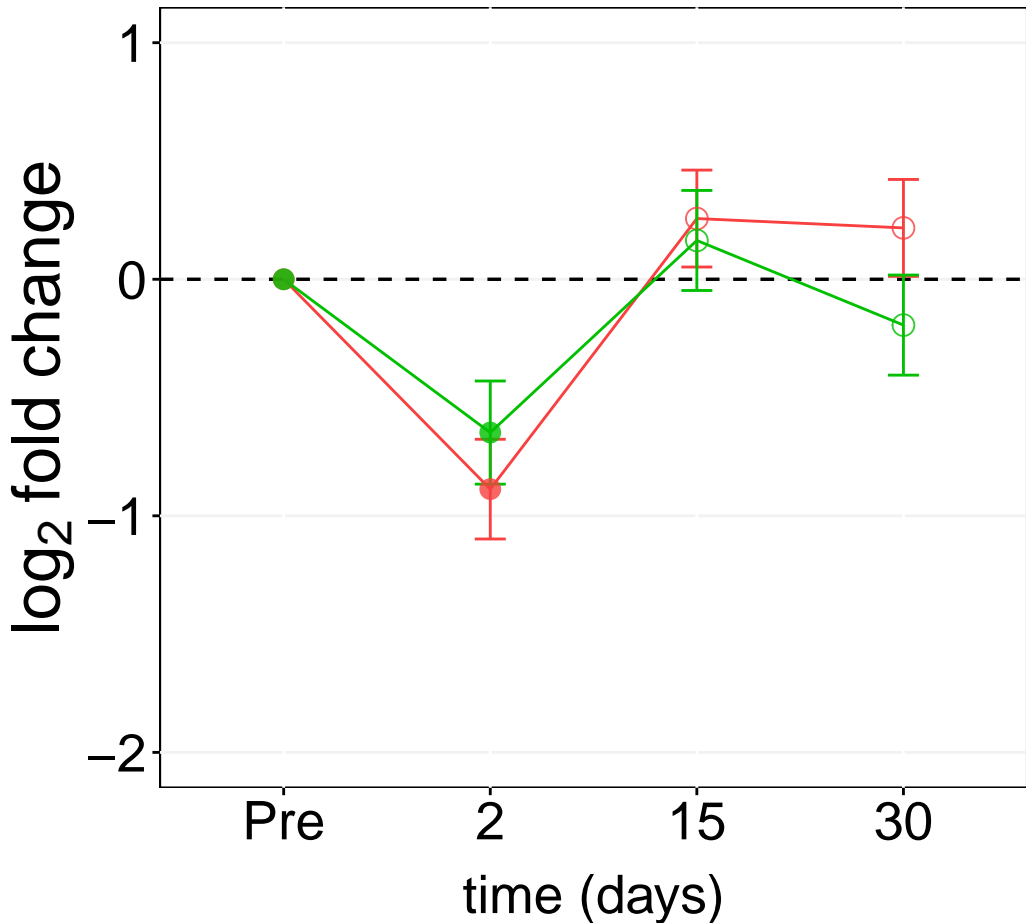

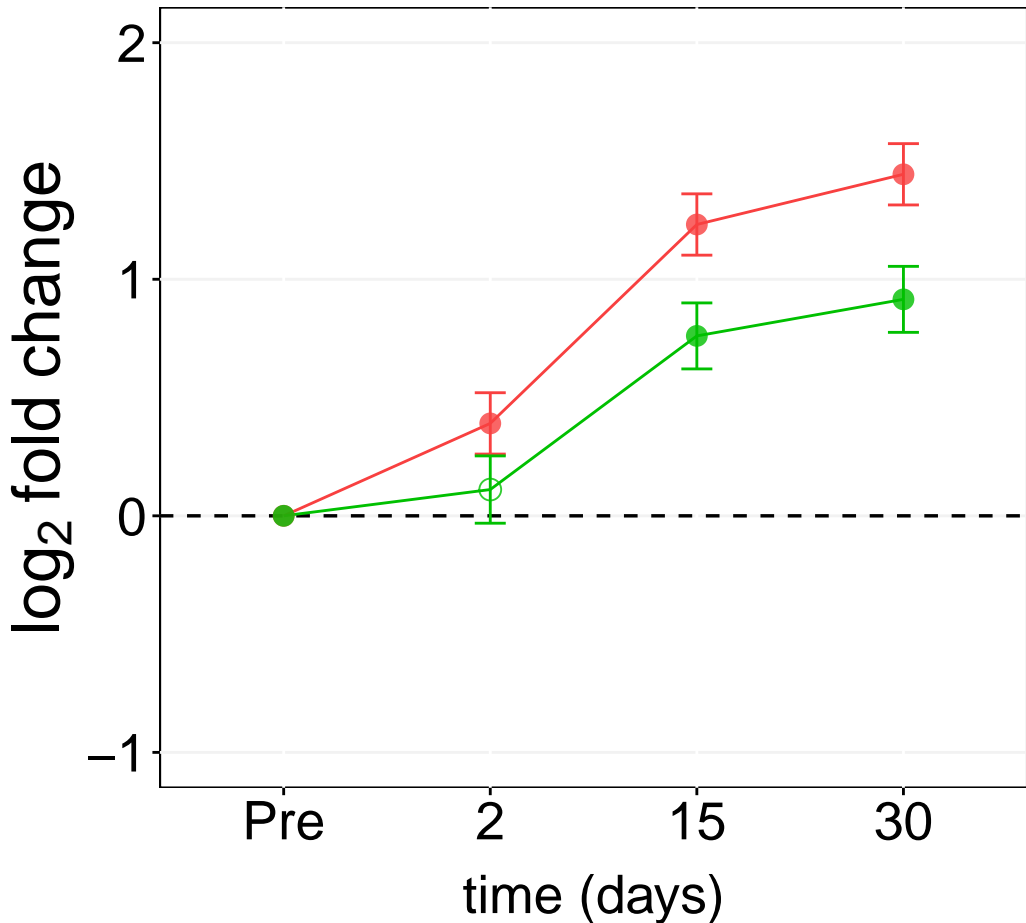

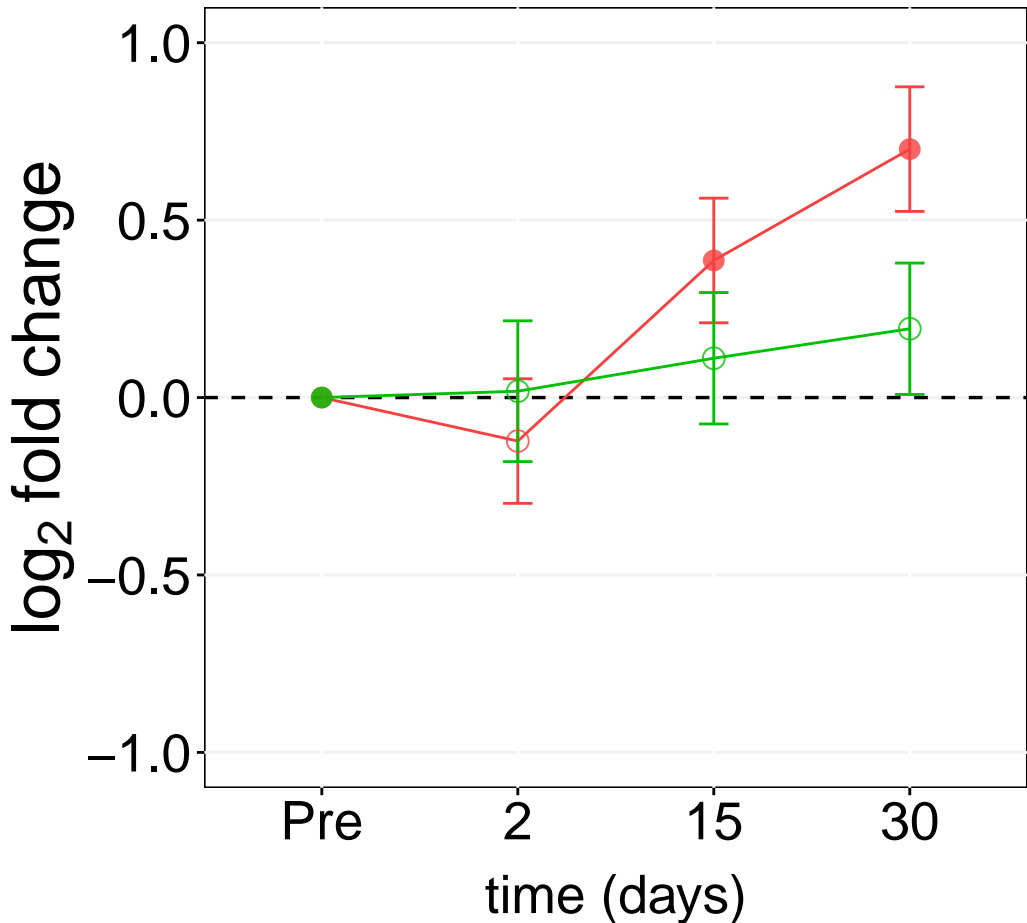

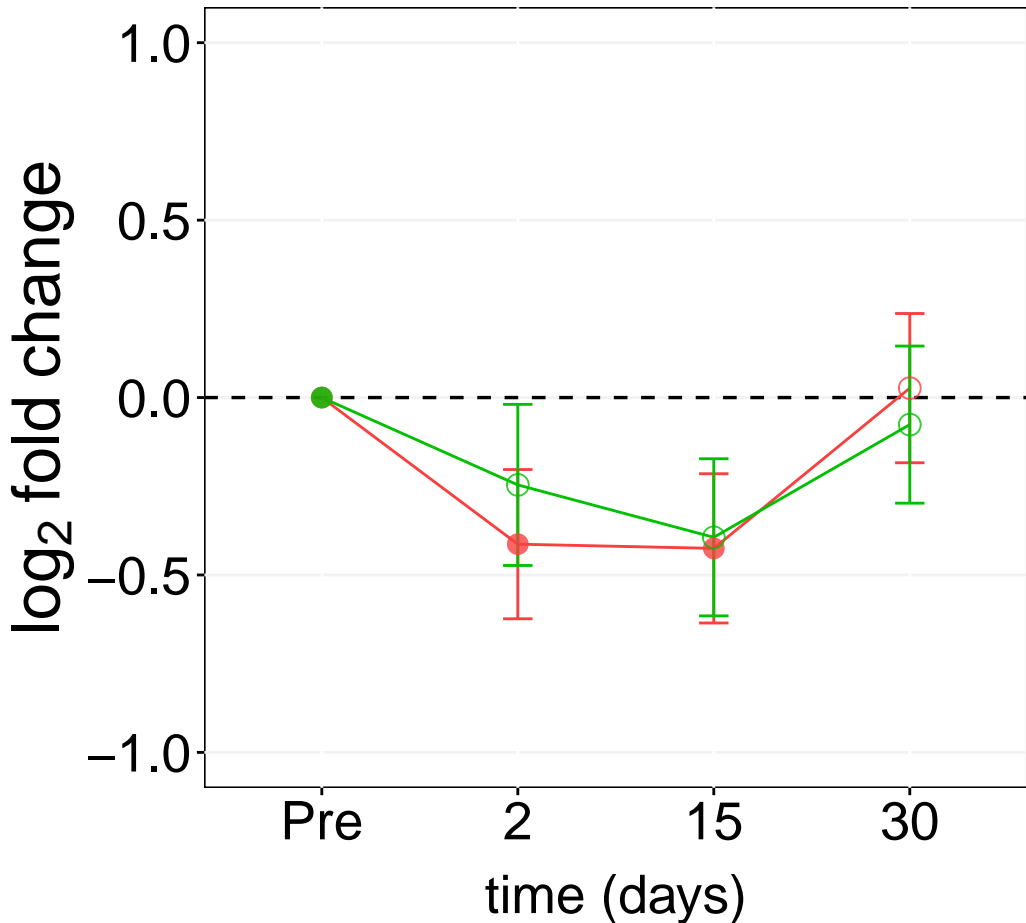



$\log_2$  fold change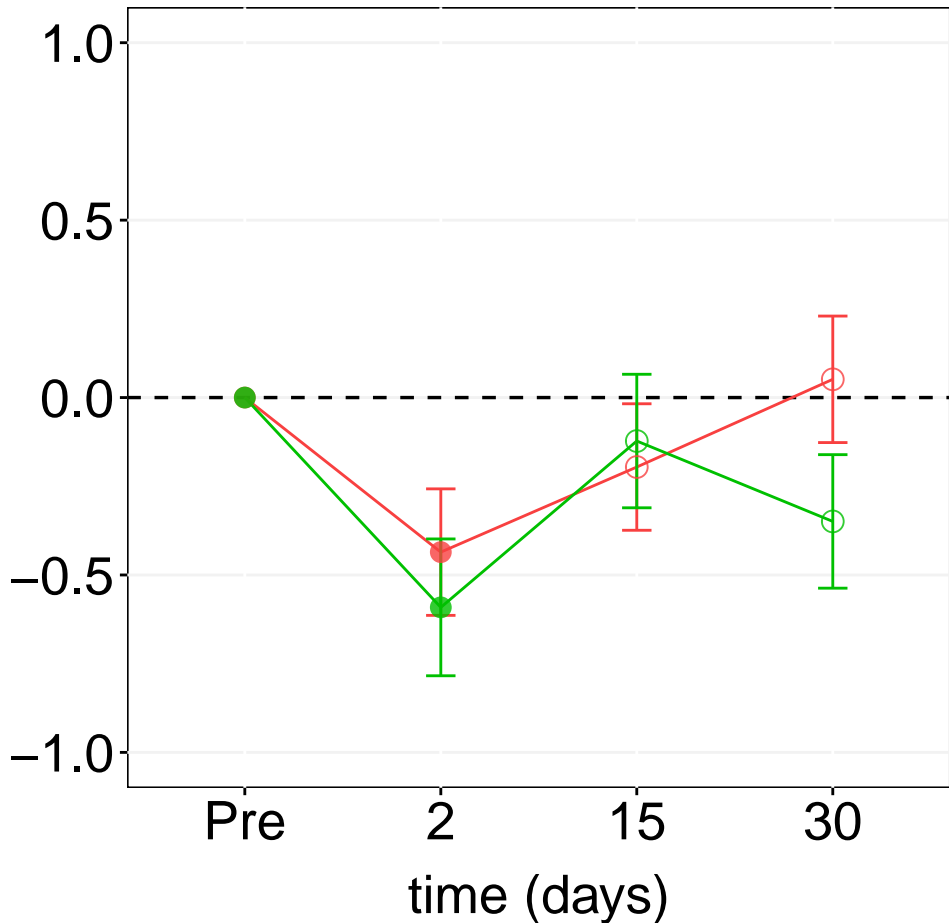

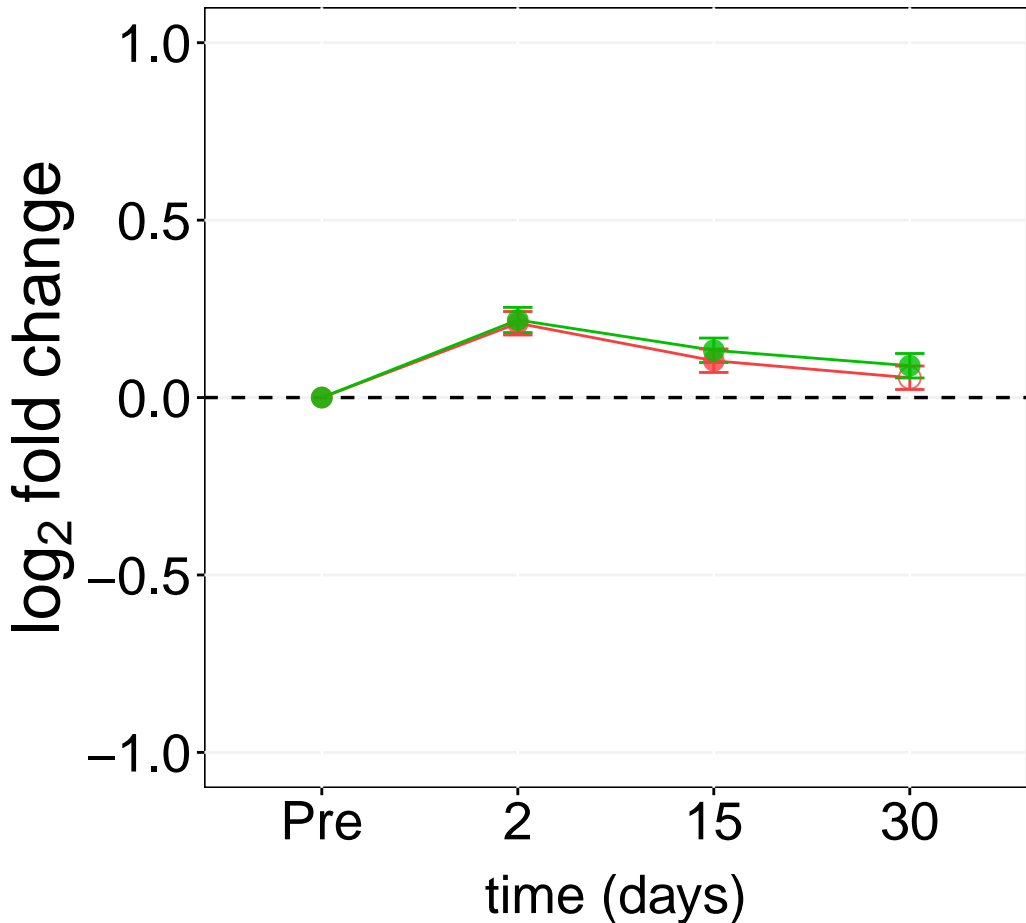

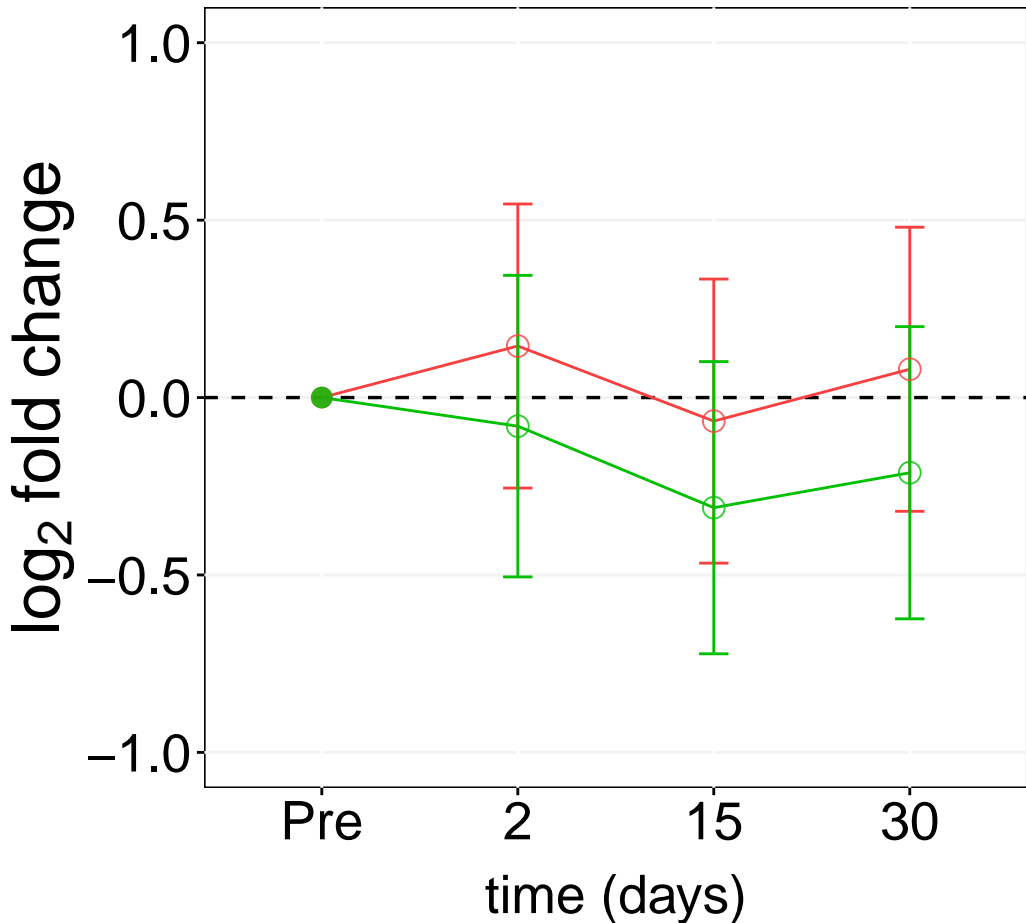

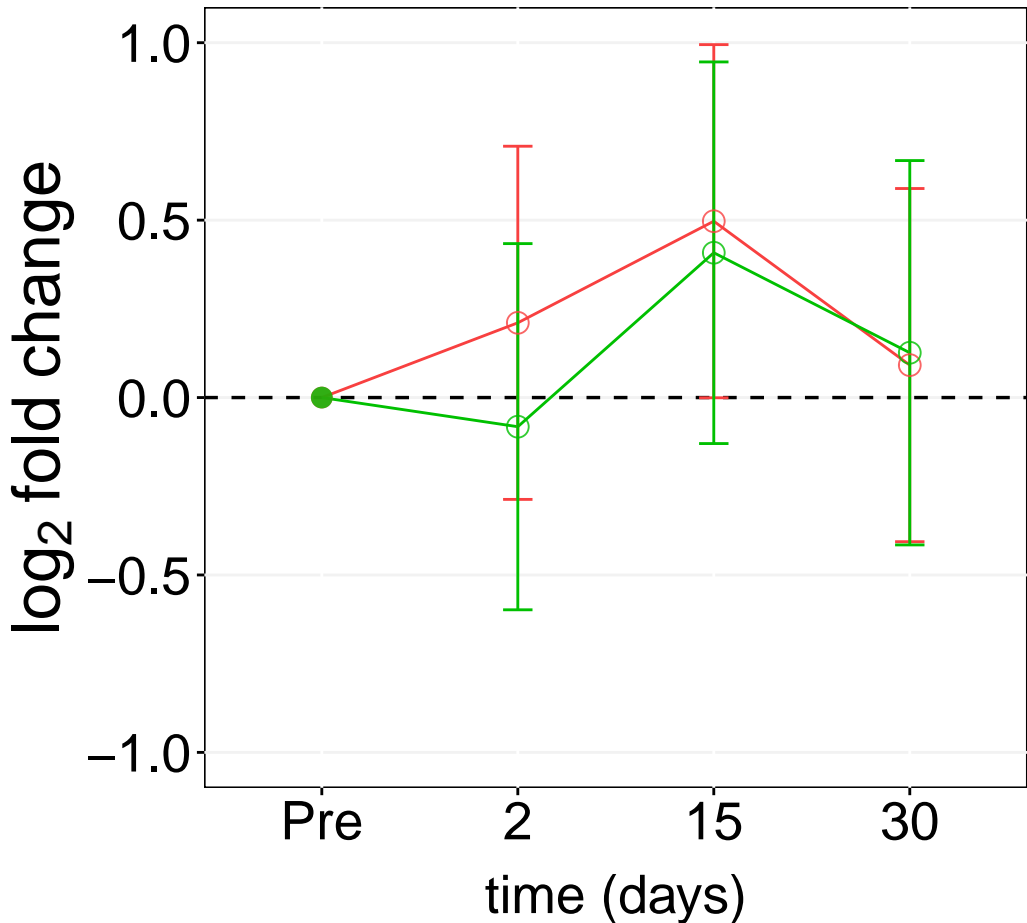

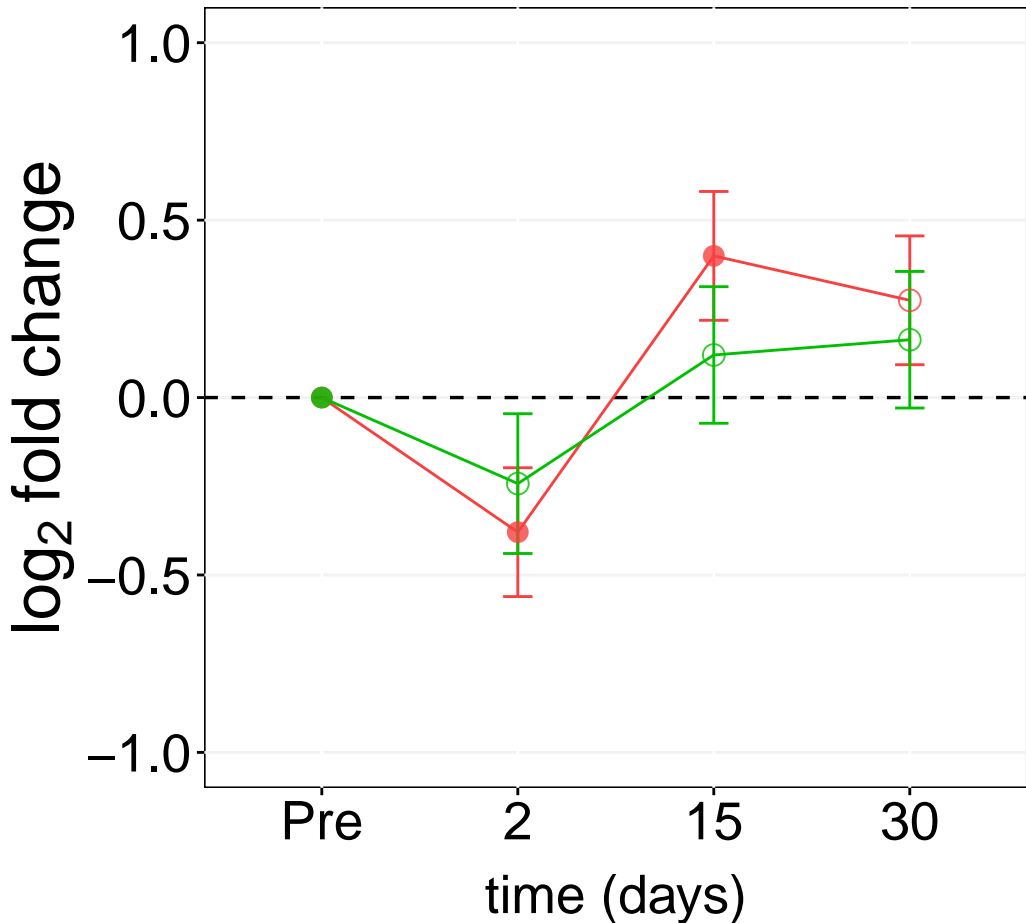

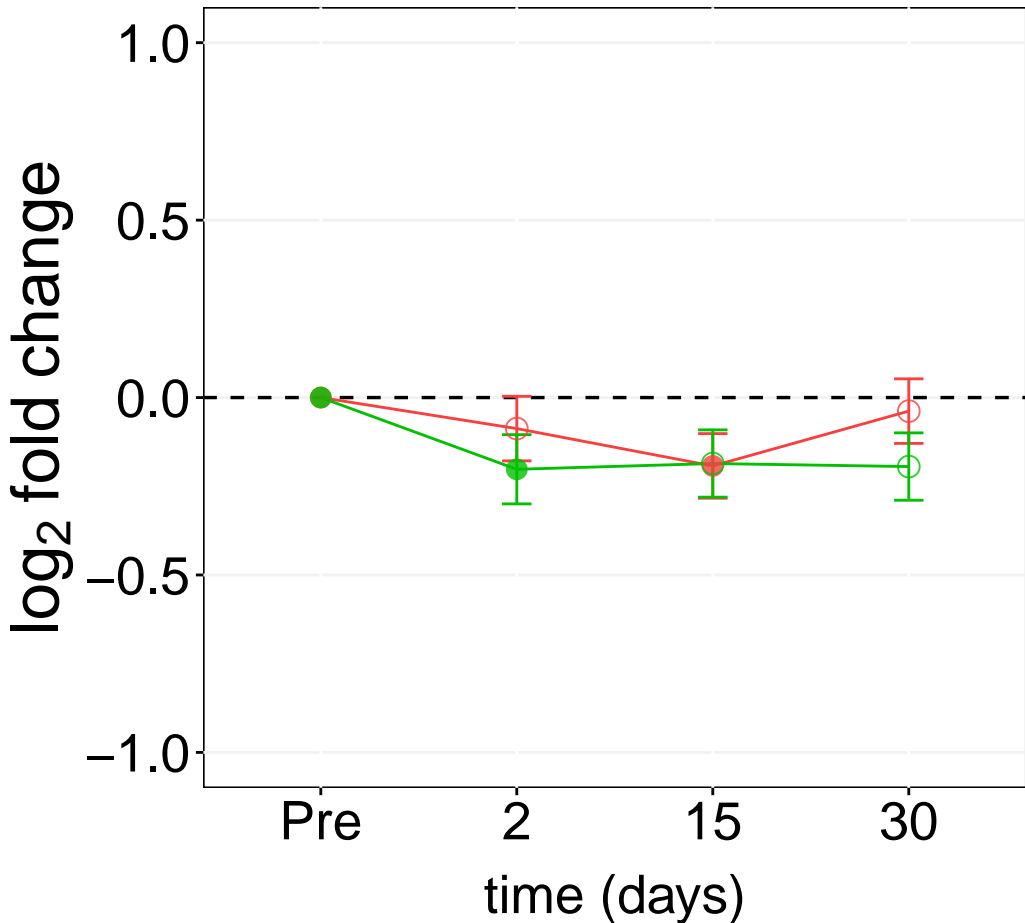

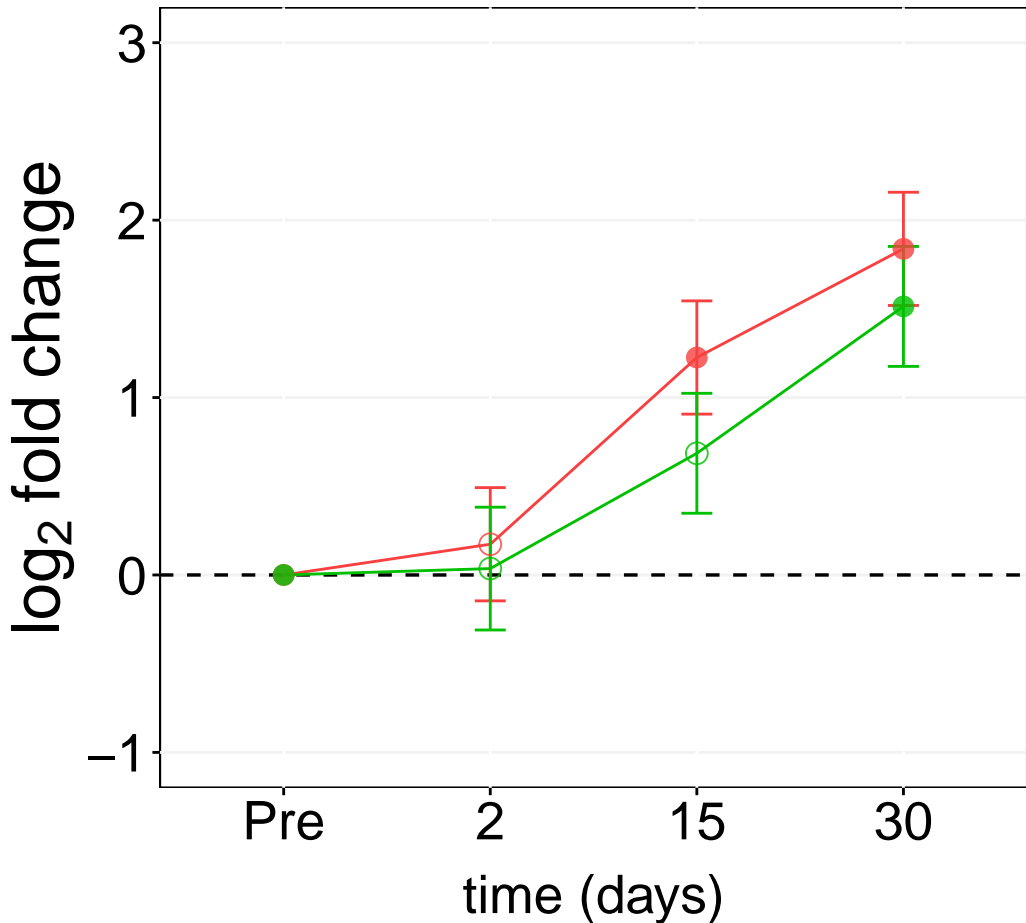

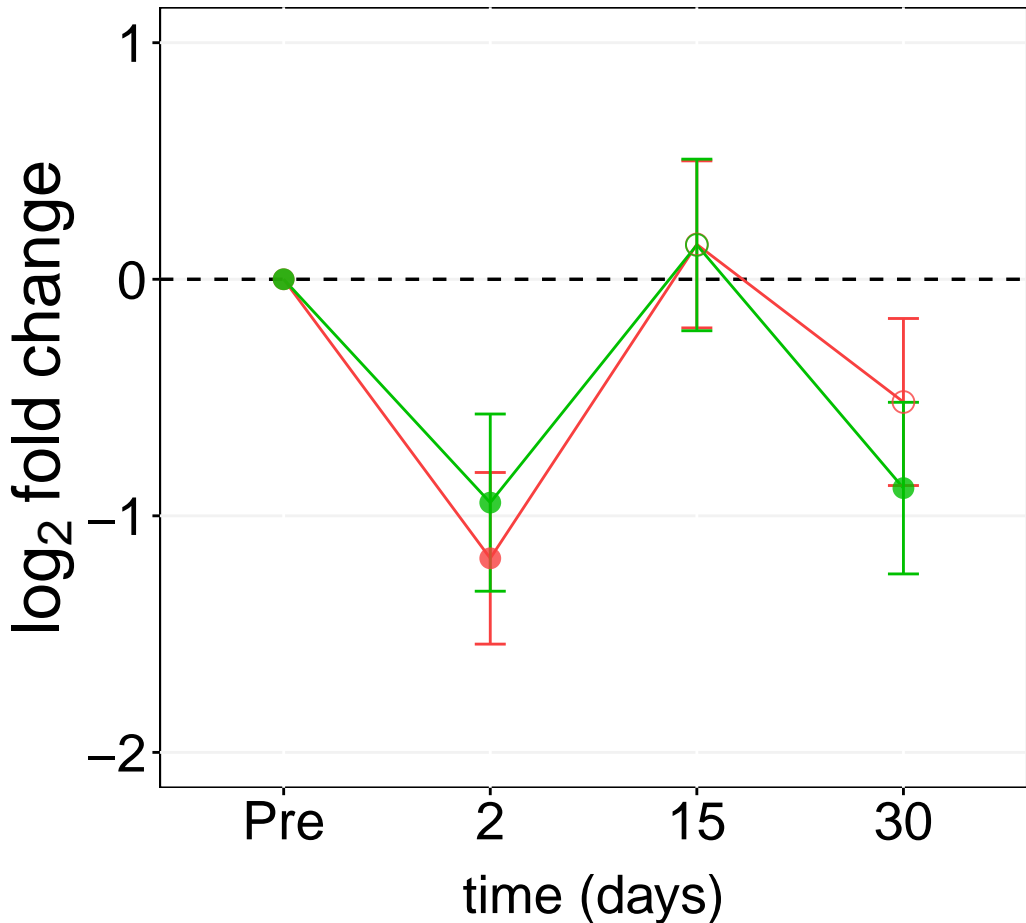



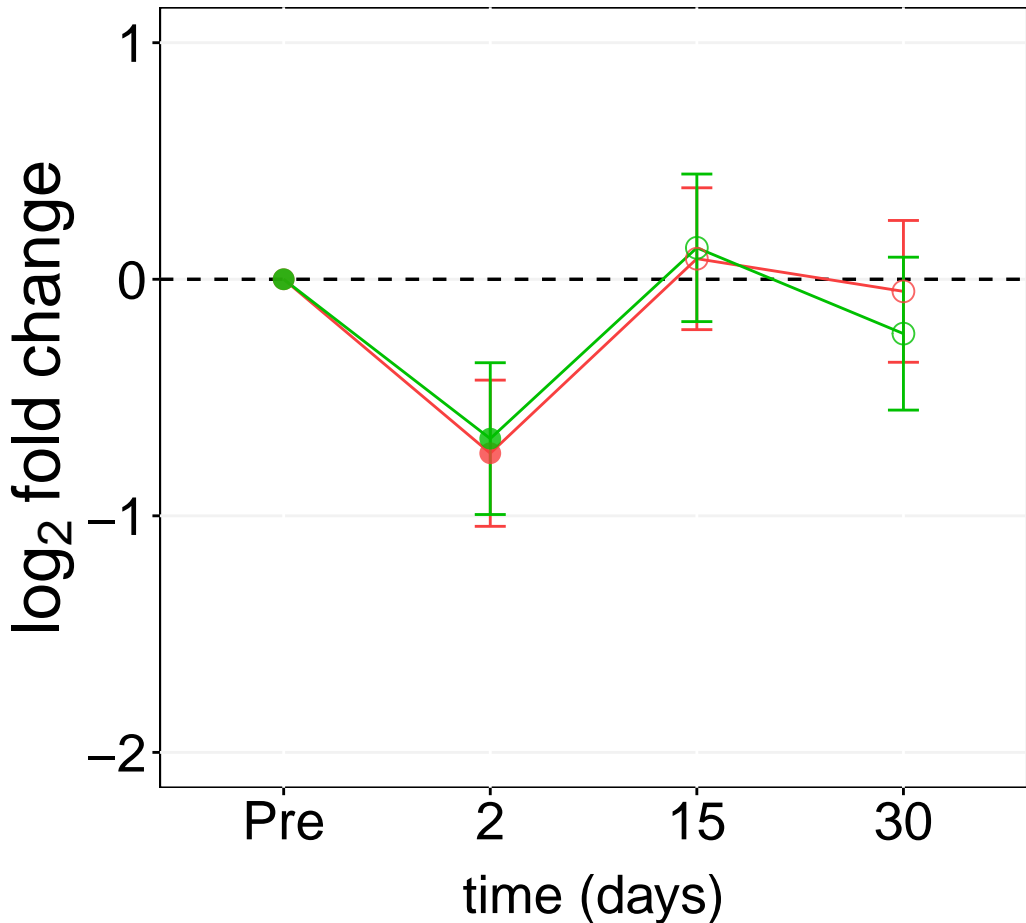

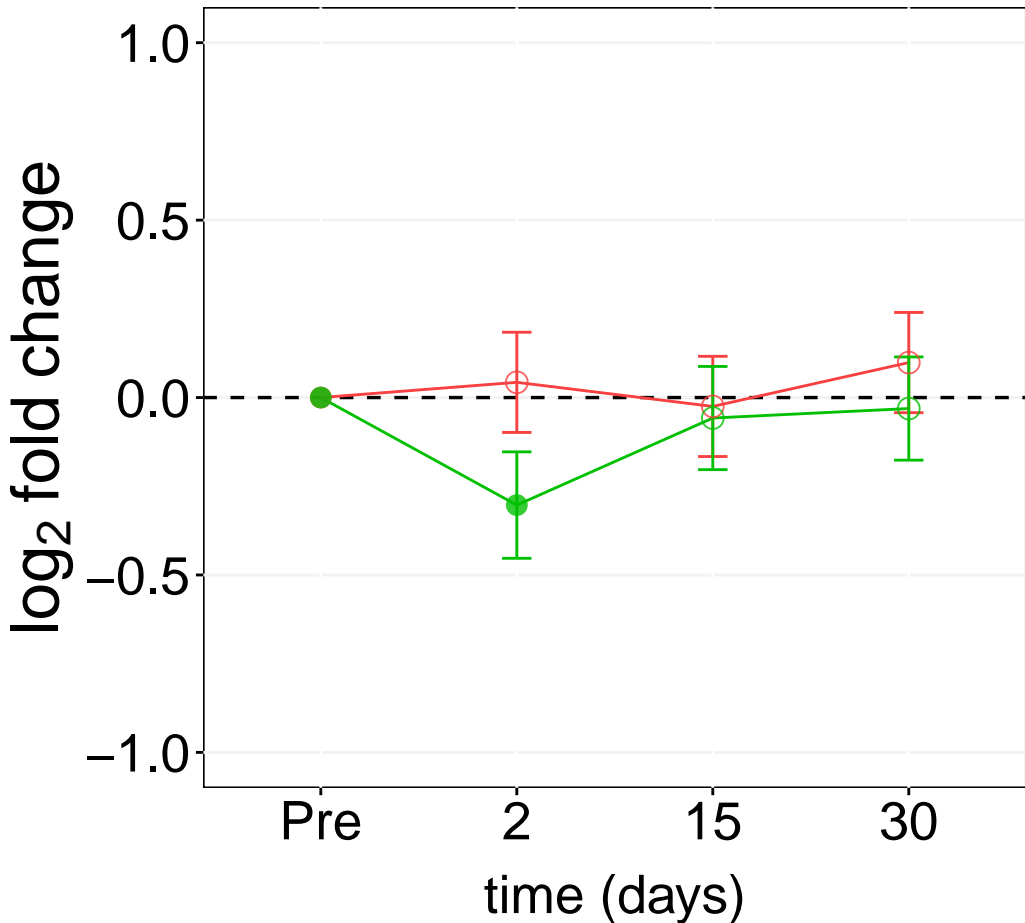

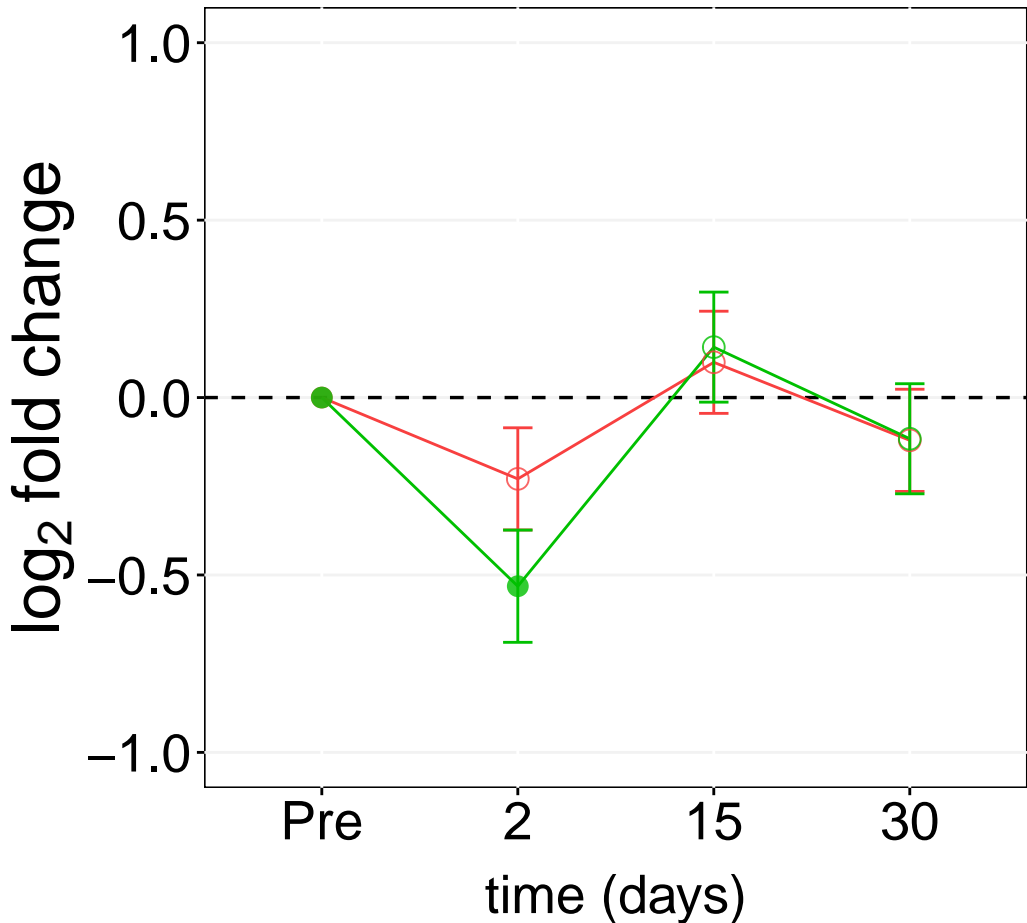

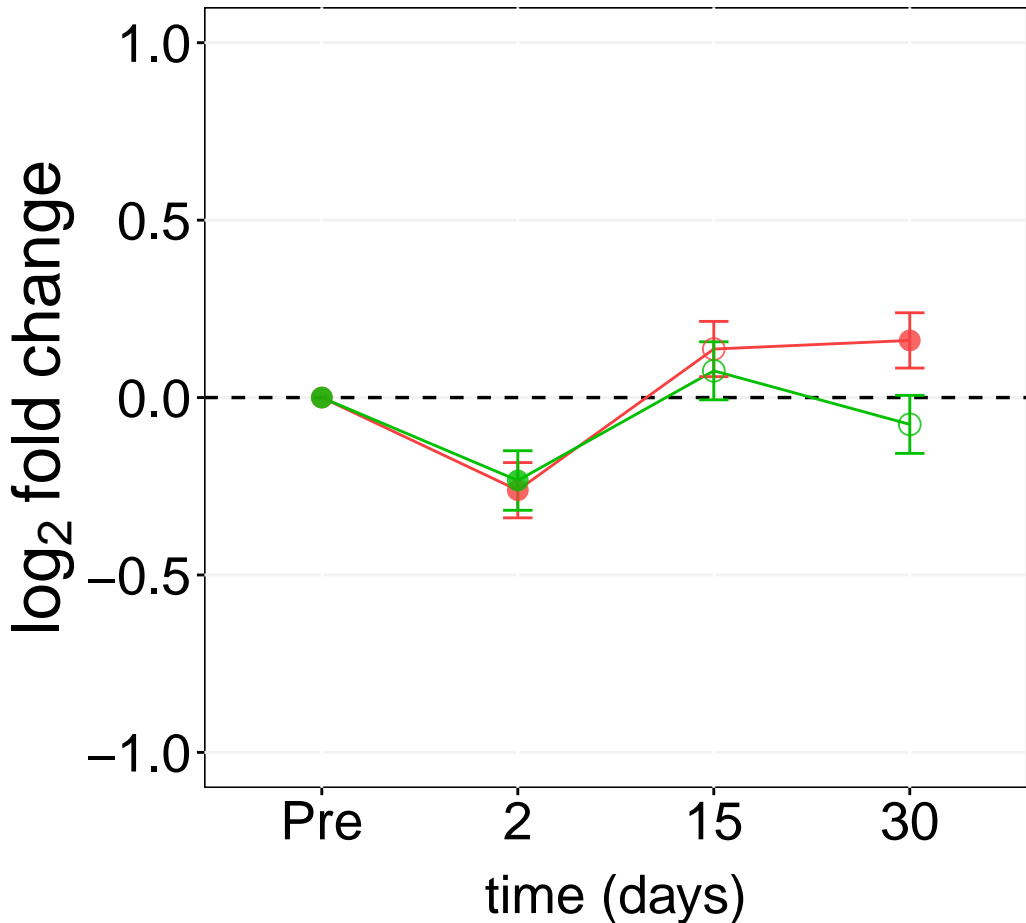

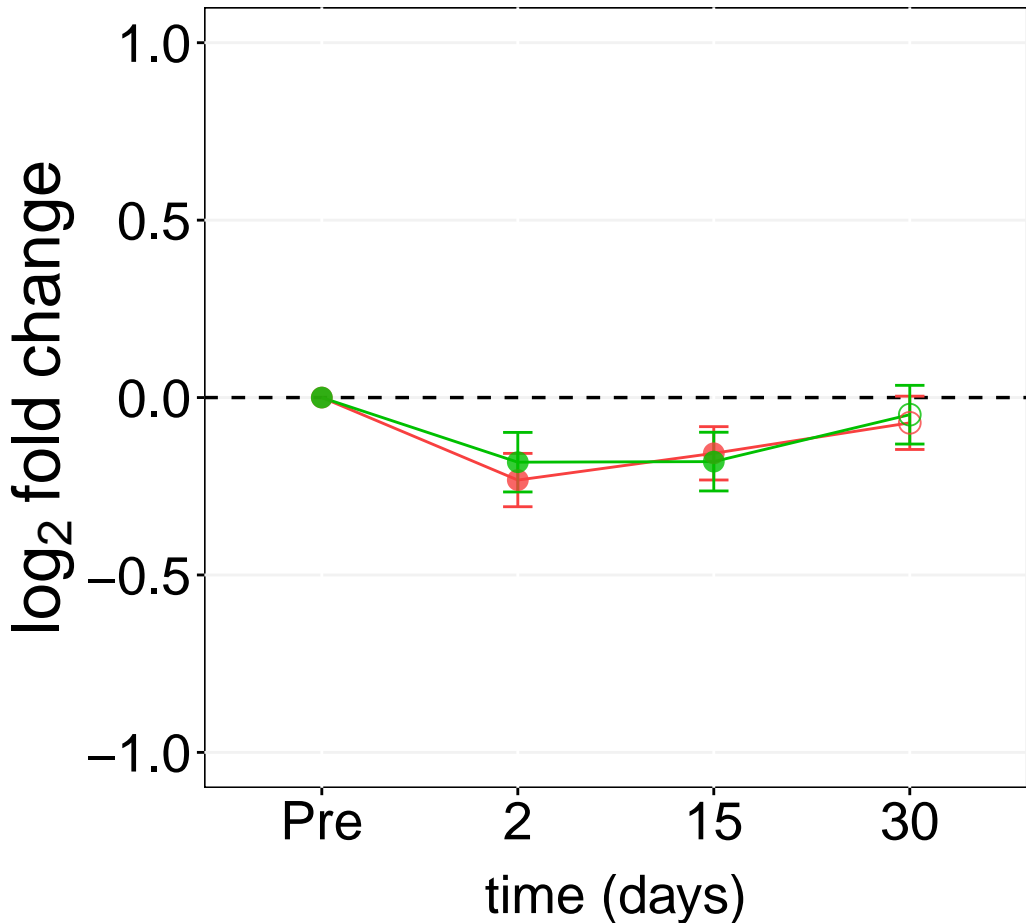

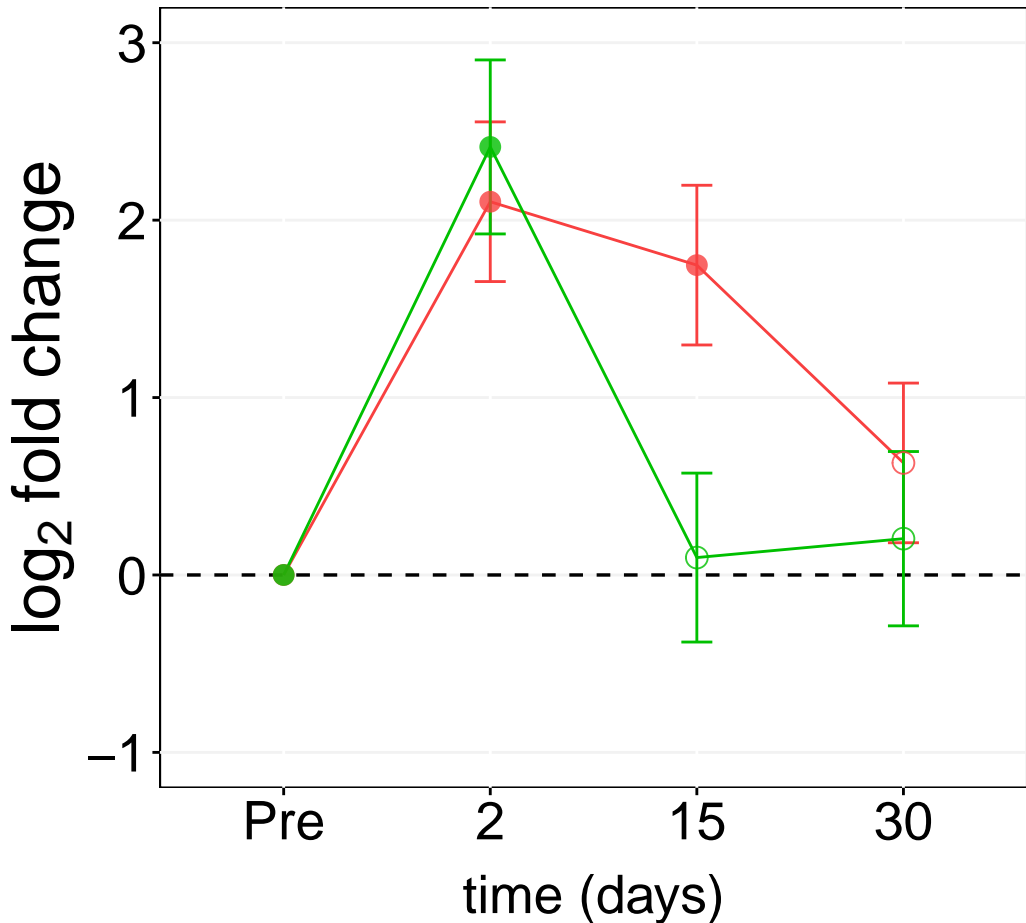

$\log_2$  fold change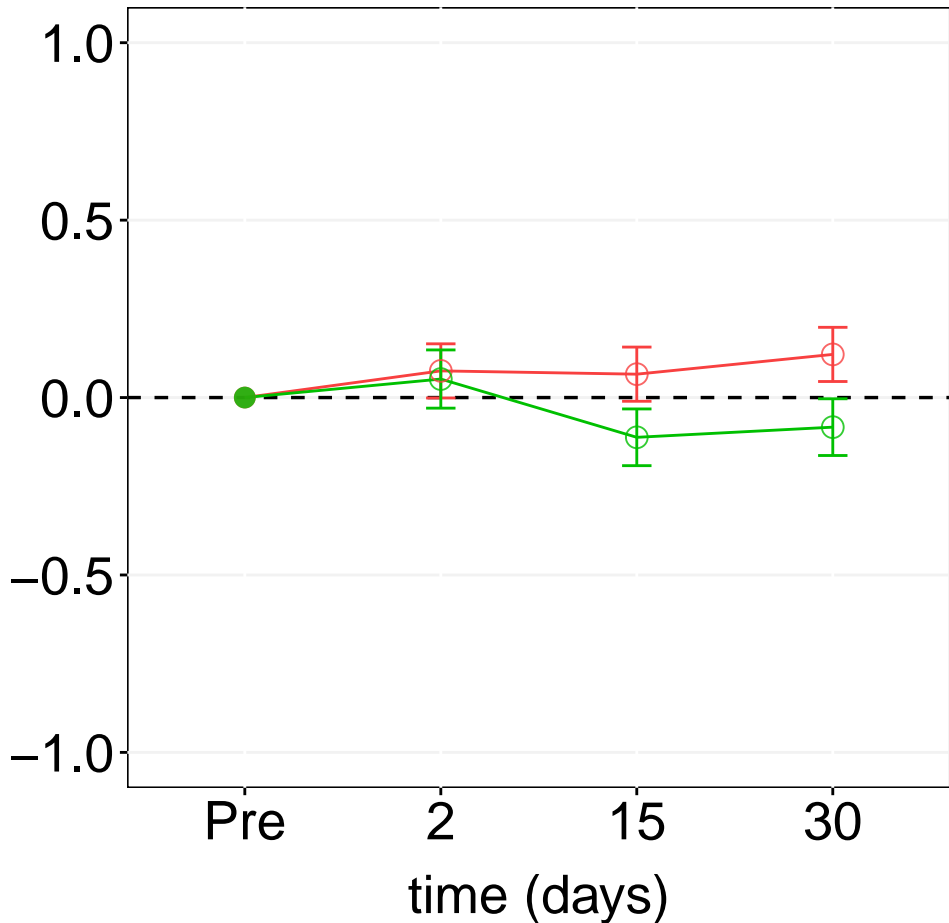

$\log_2$  fold change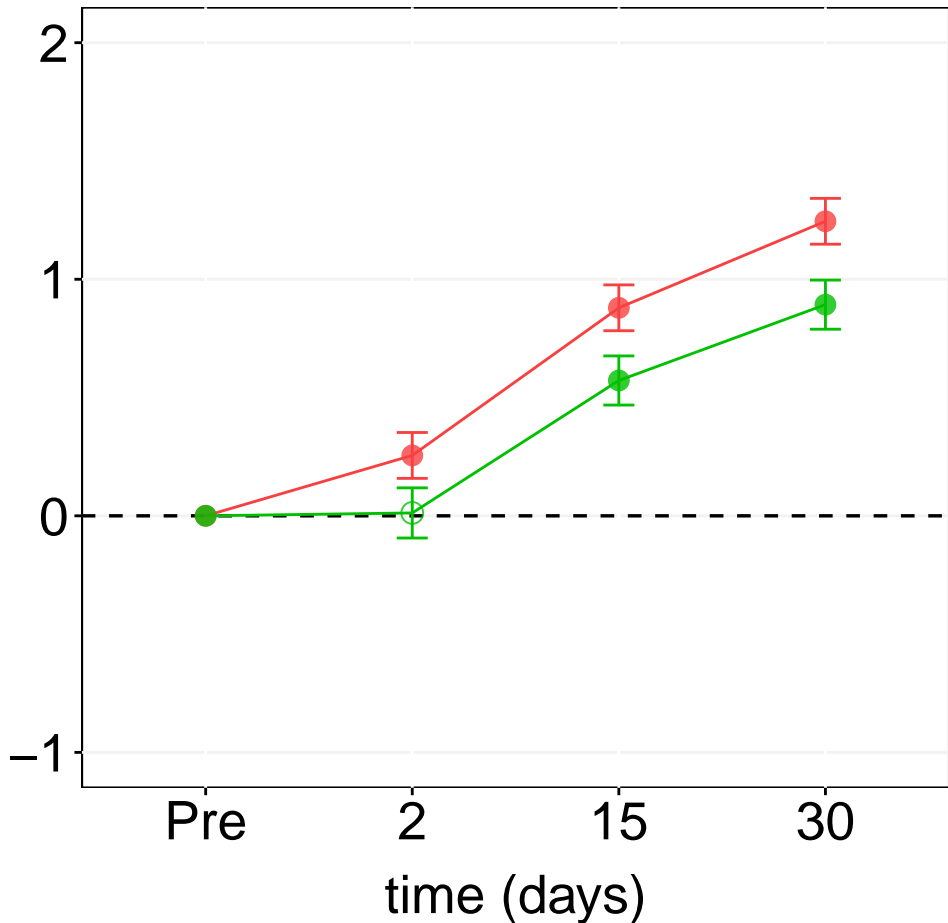



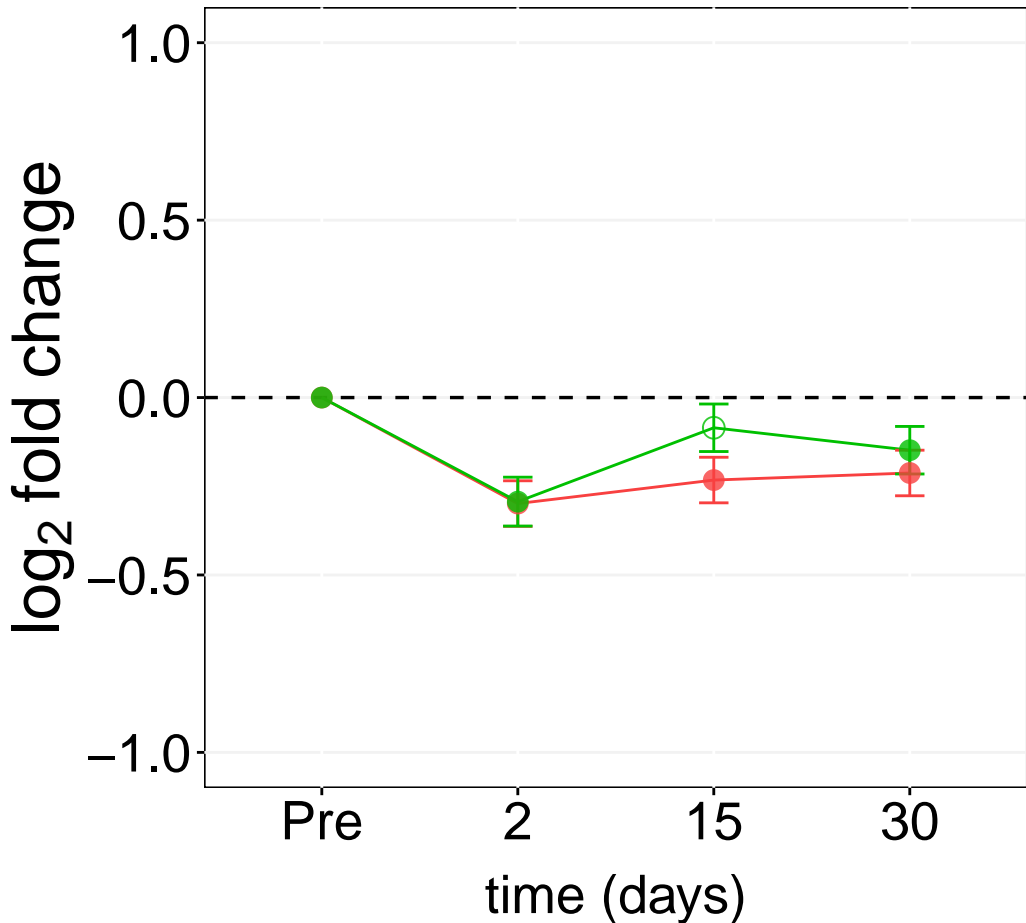

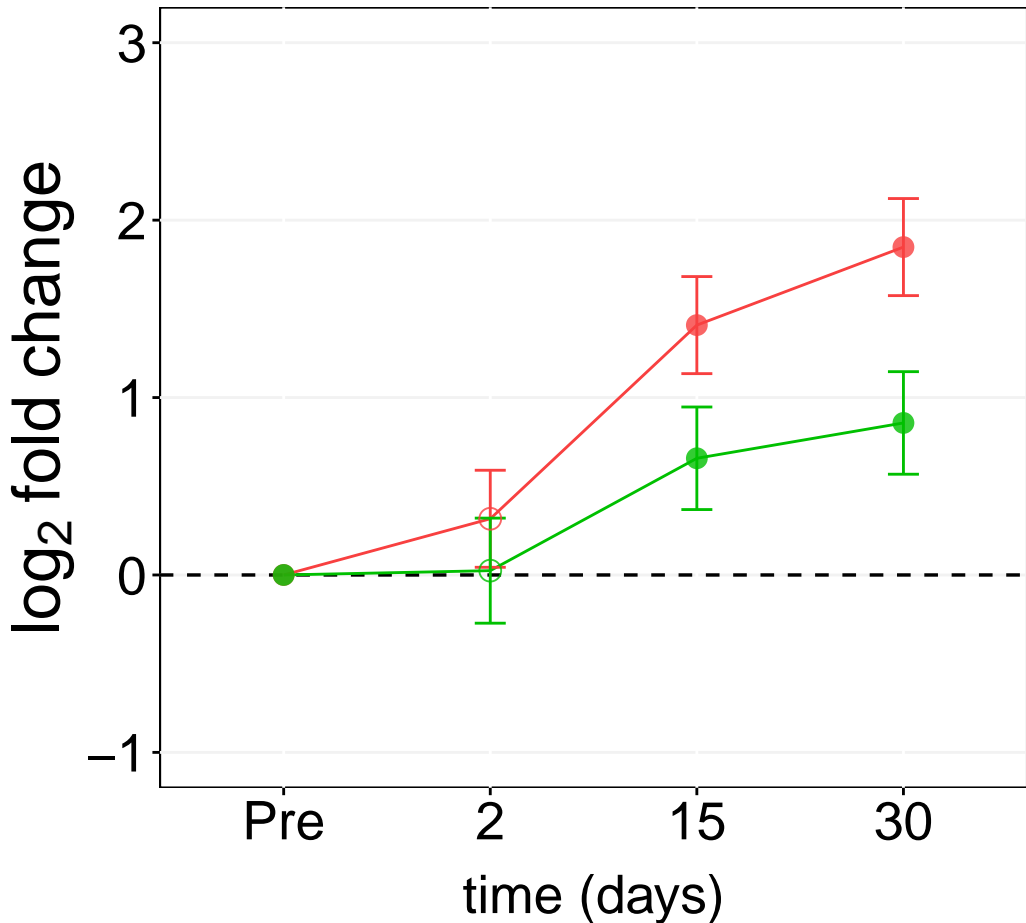

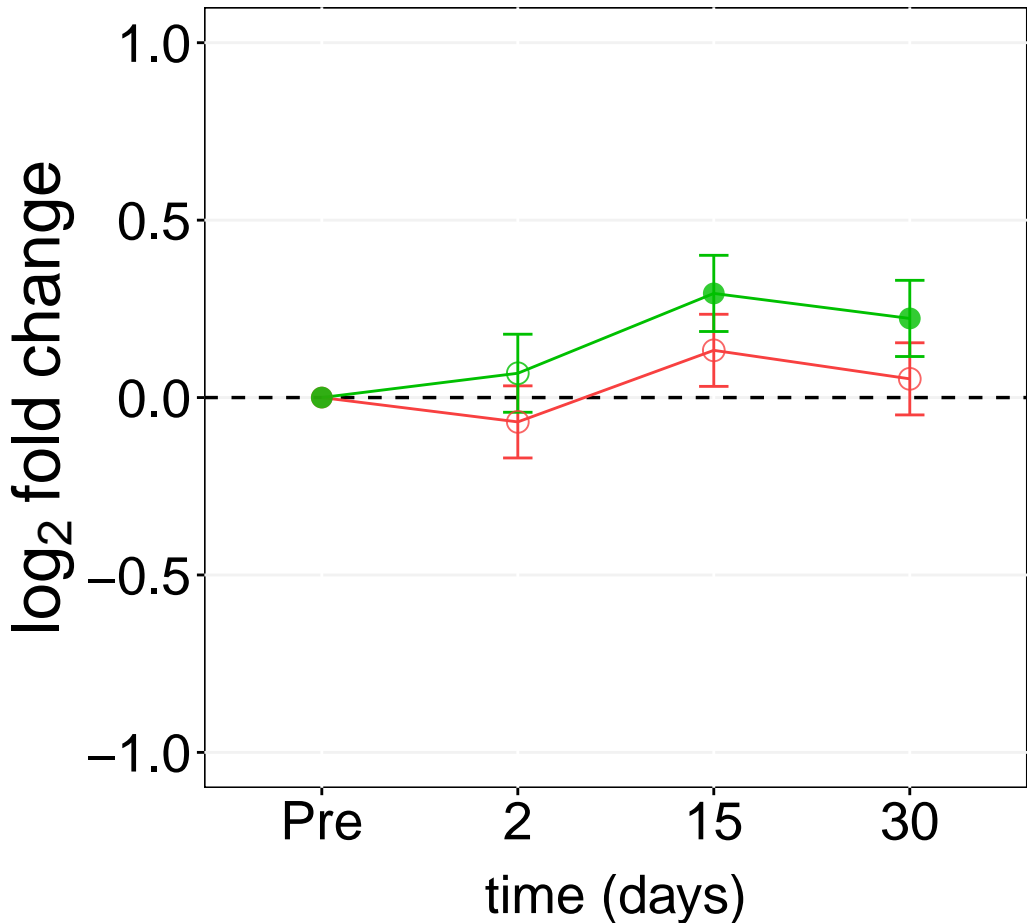

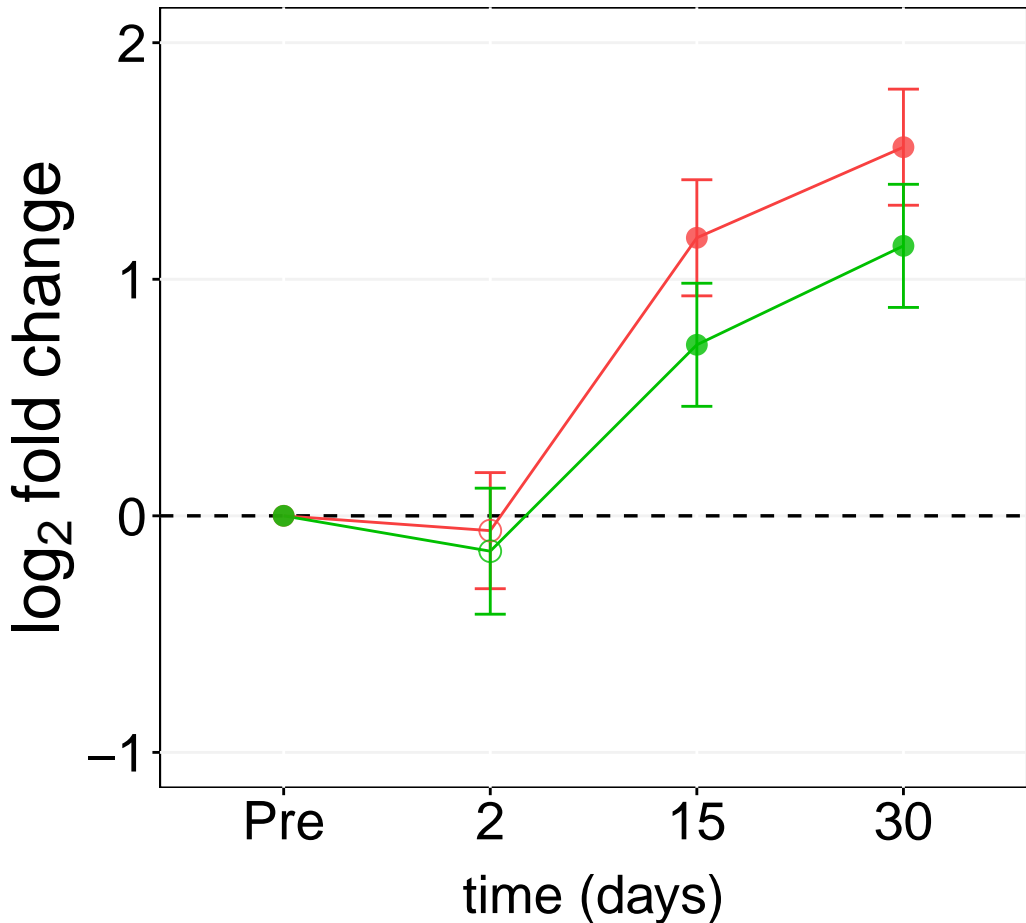

$\log_2$  fold change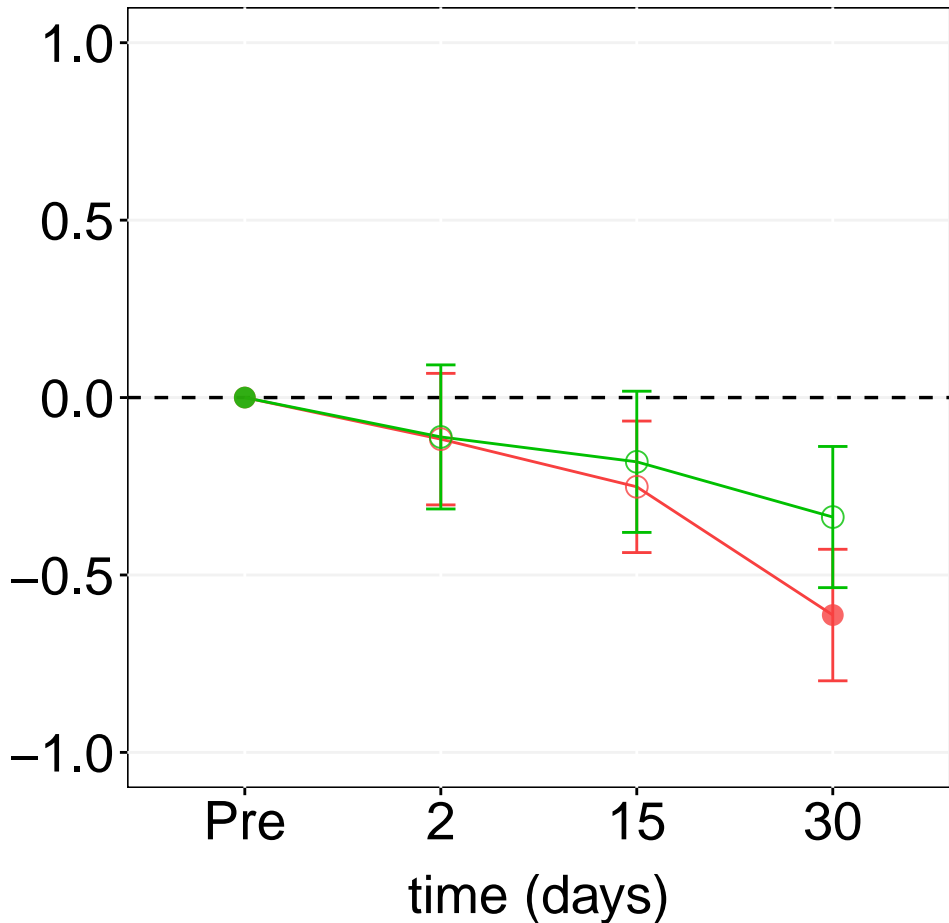

Pre

2

15

30

time (days)

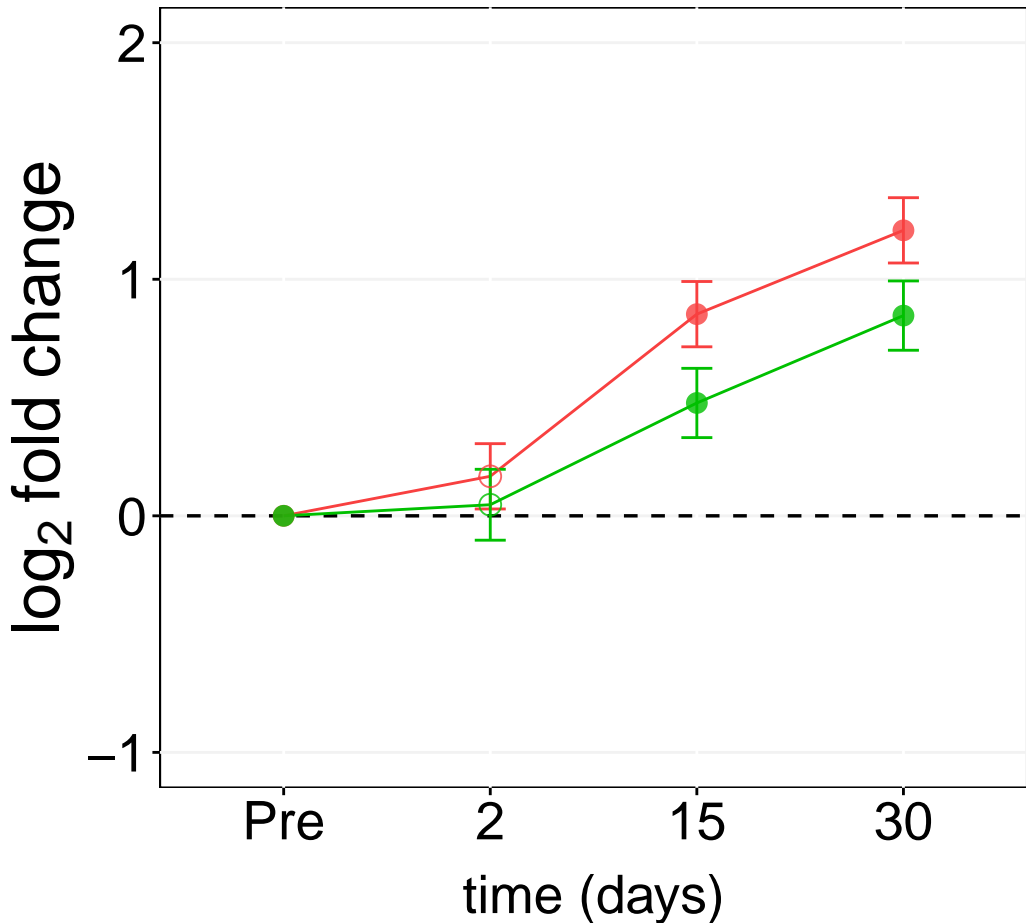

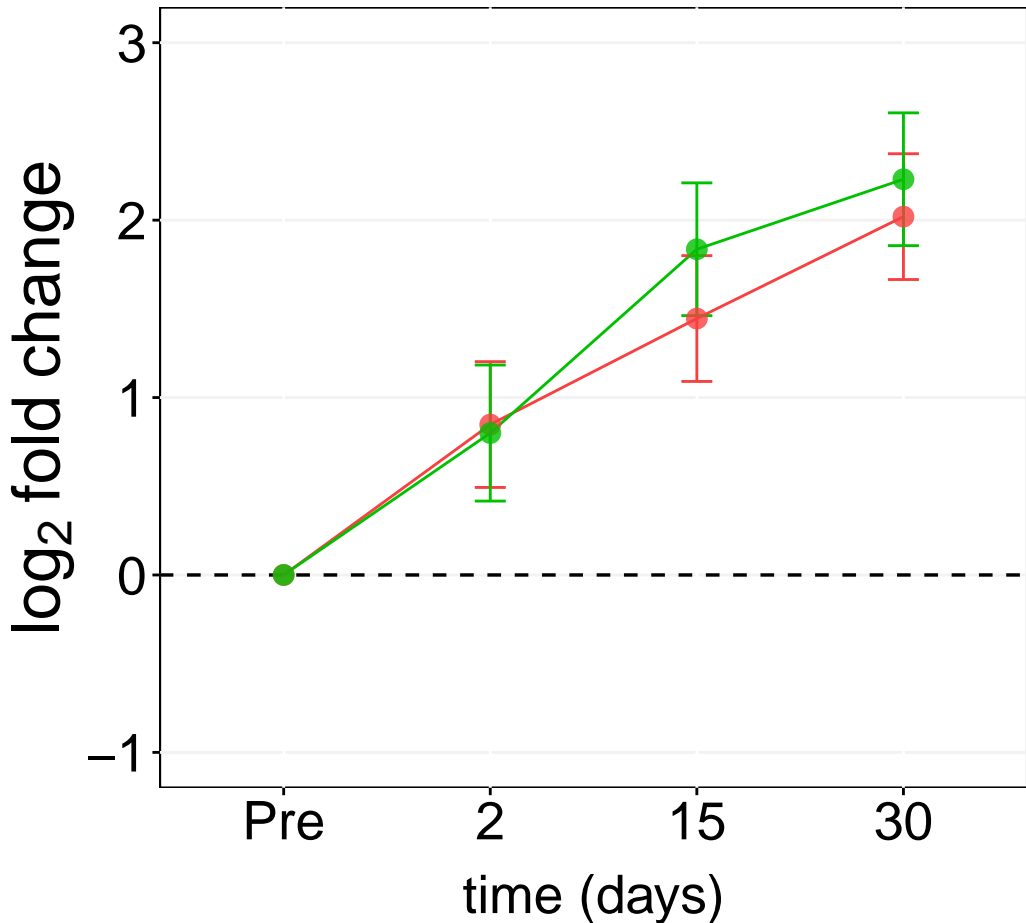

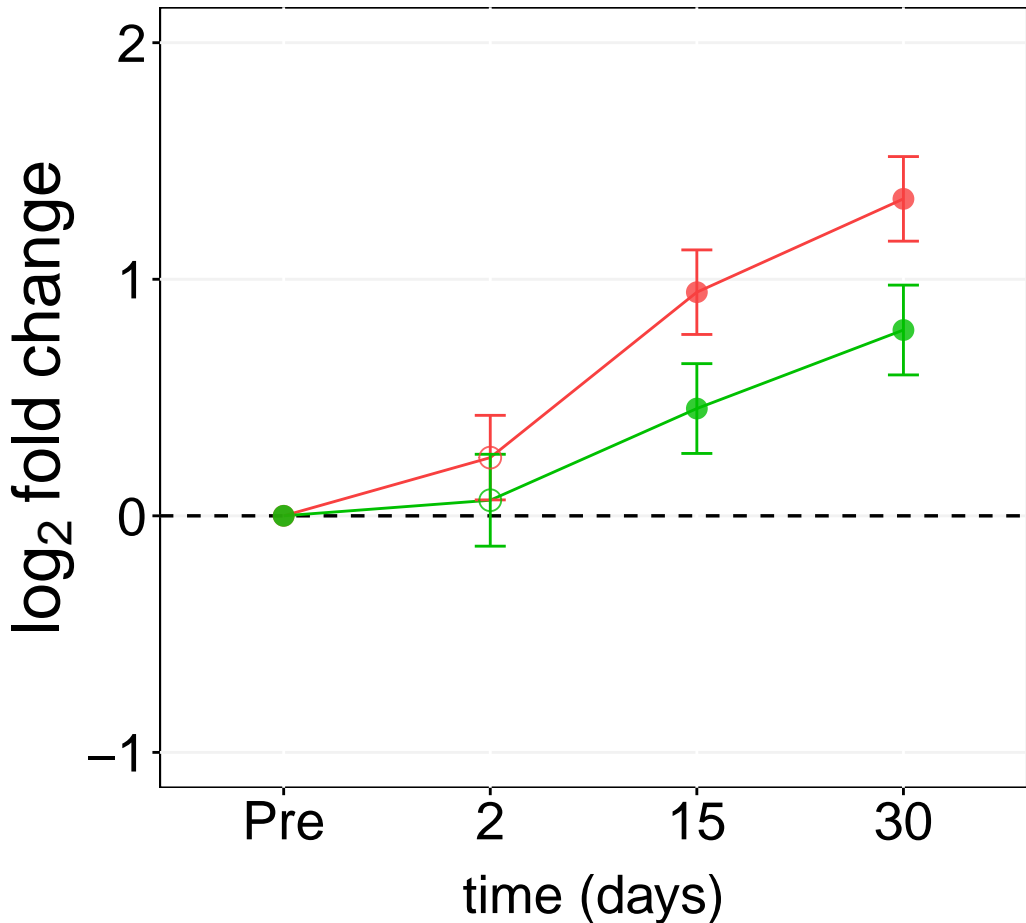



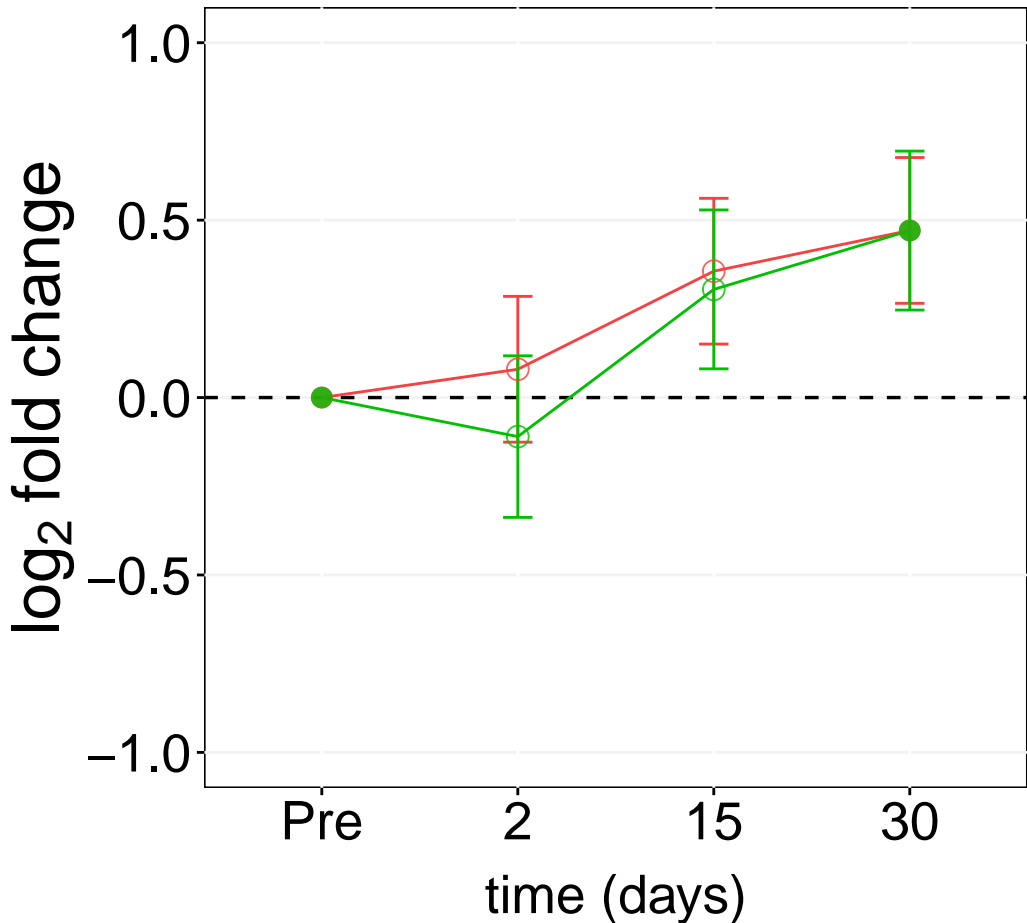

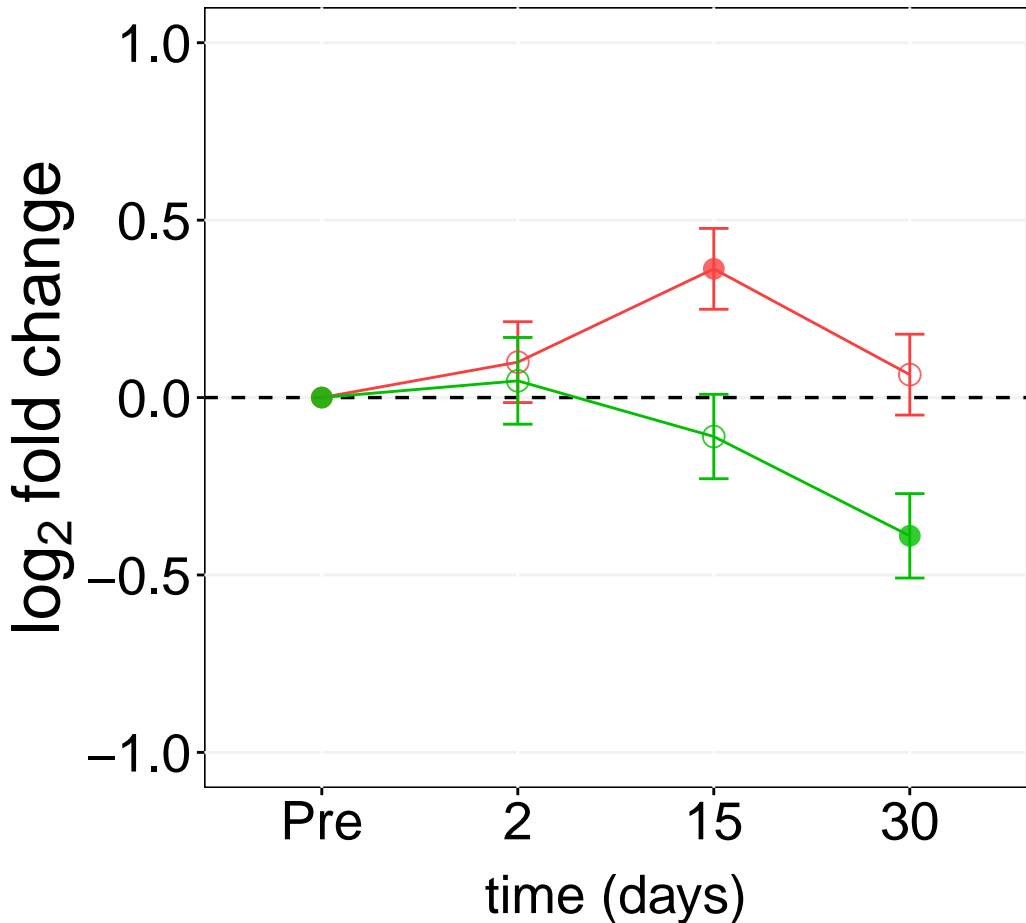

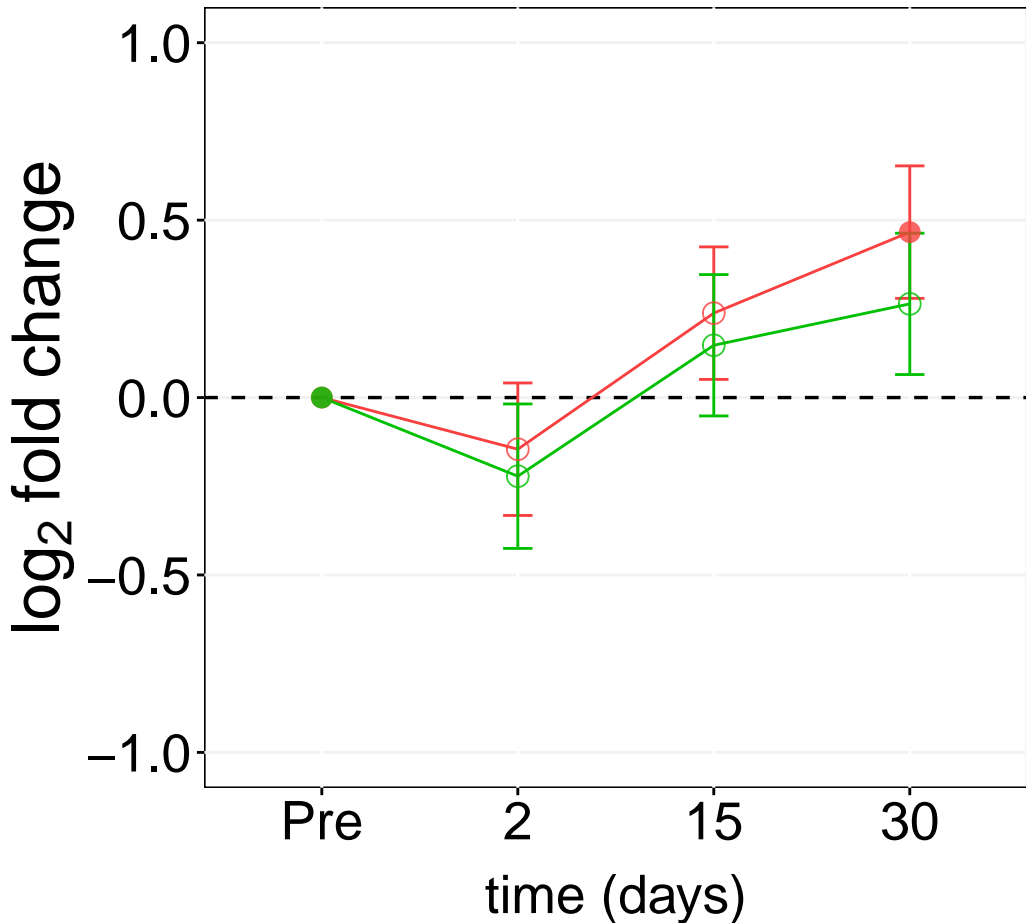

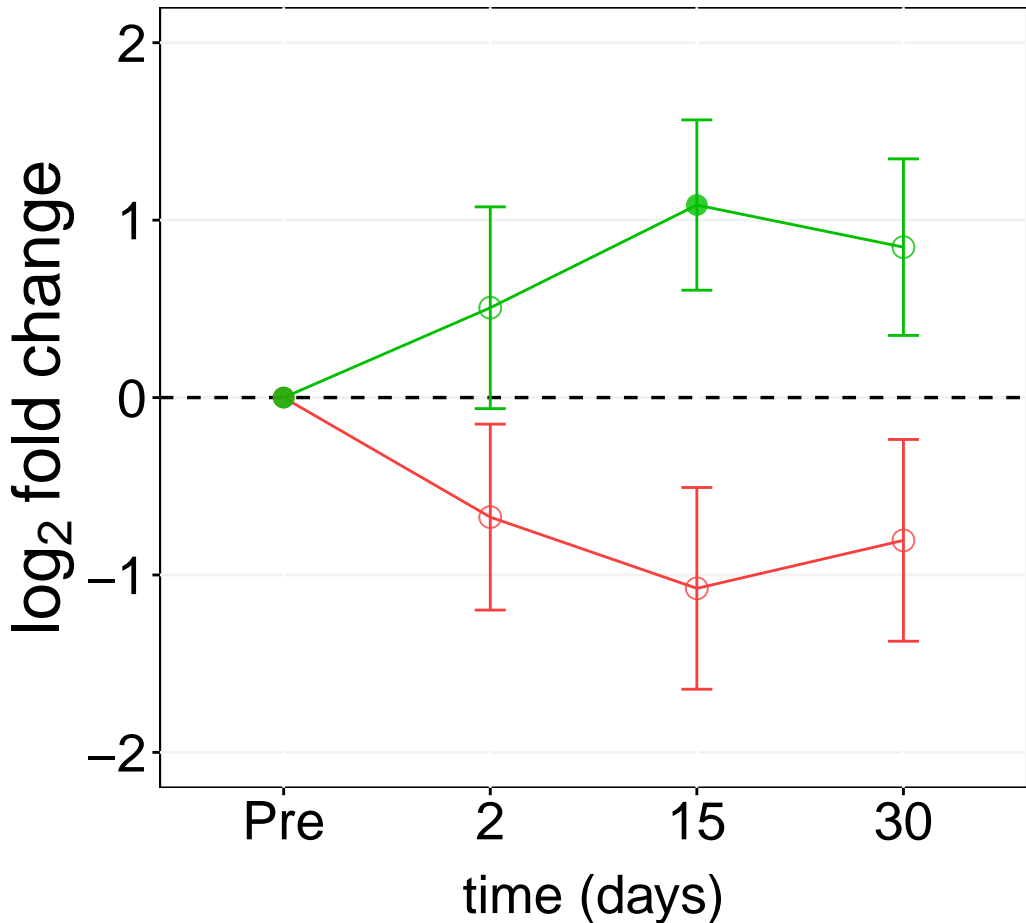

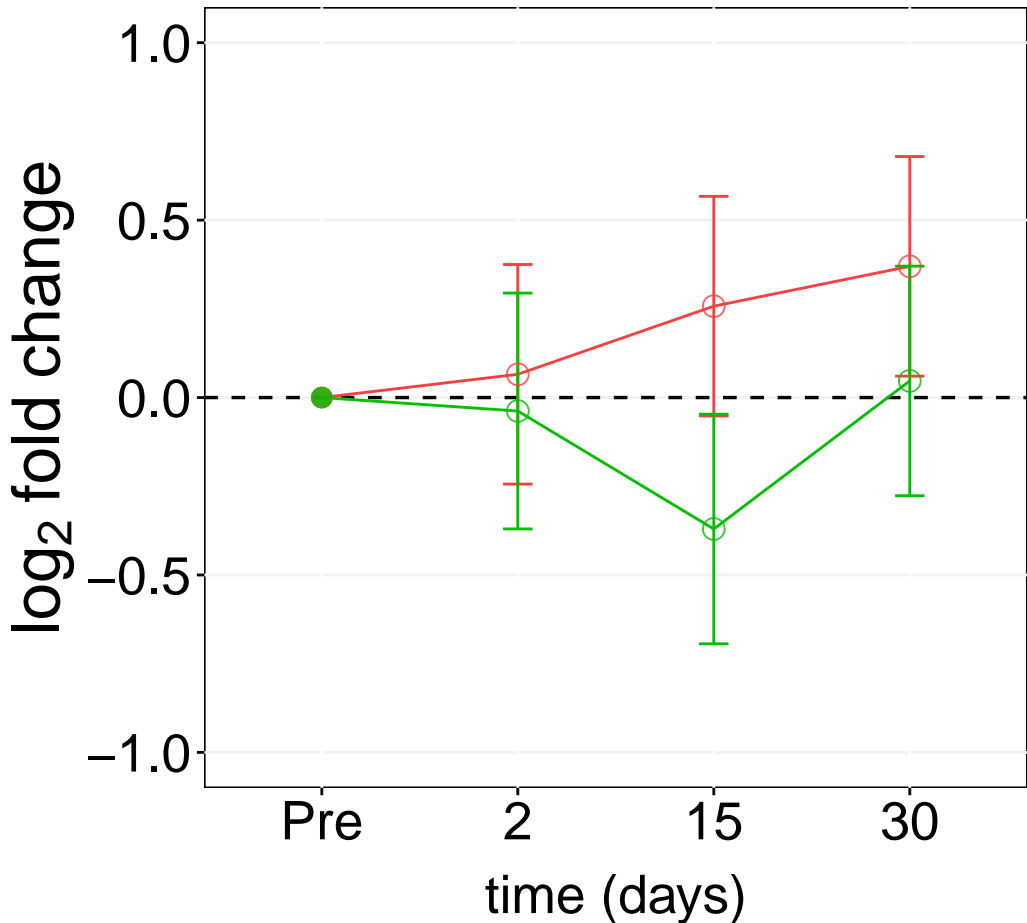

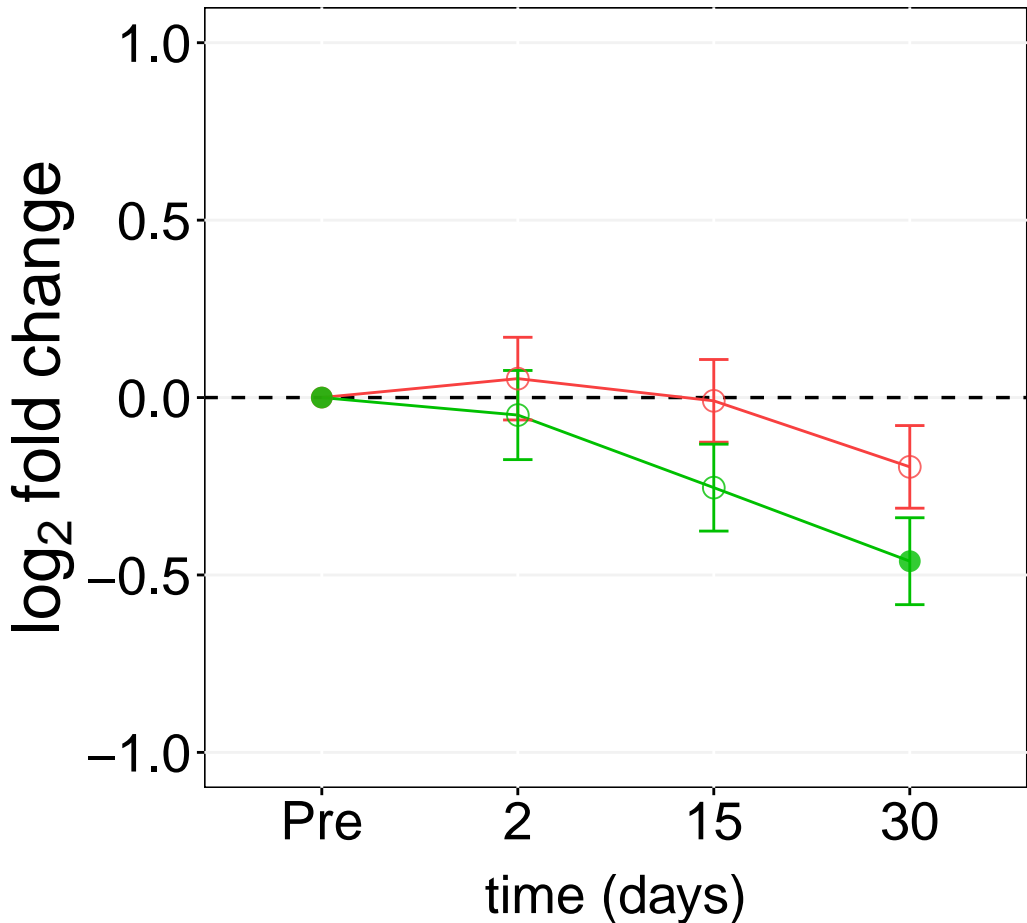

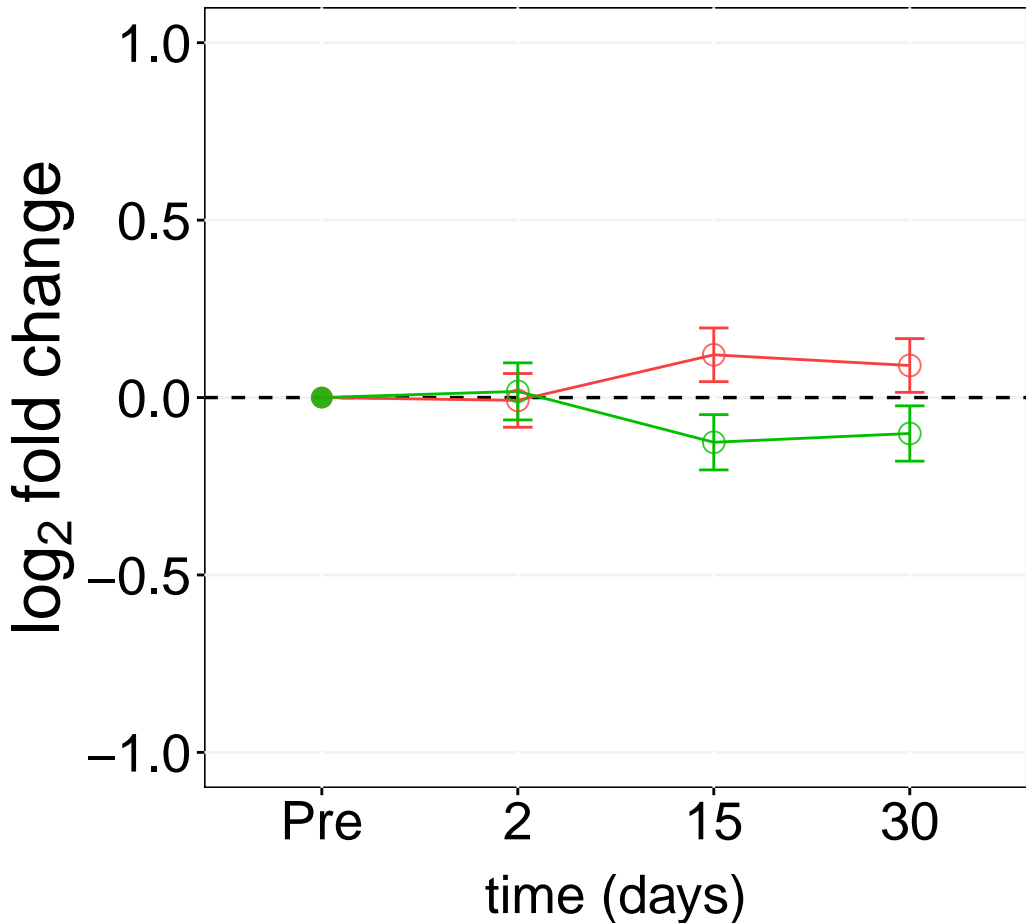

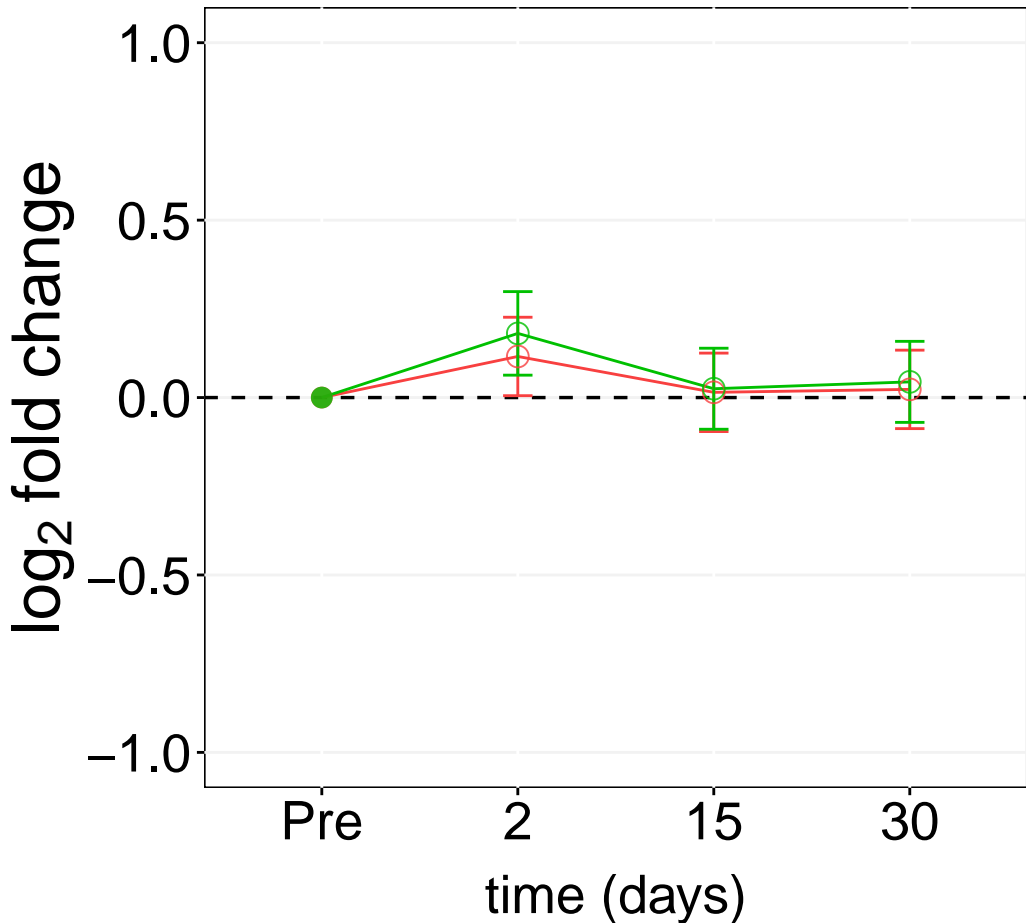



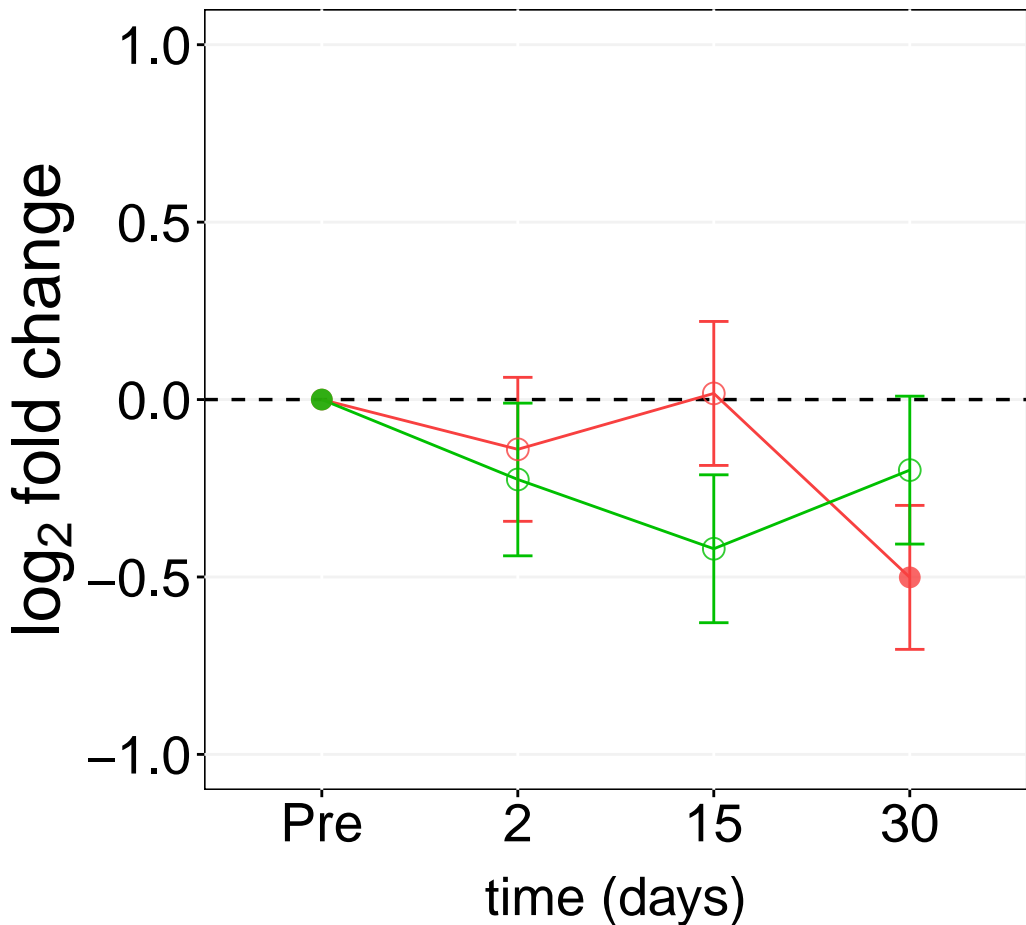

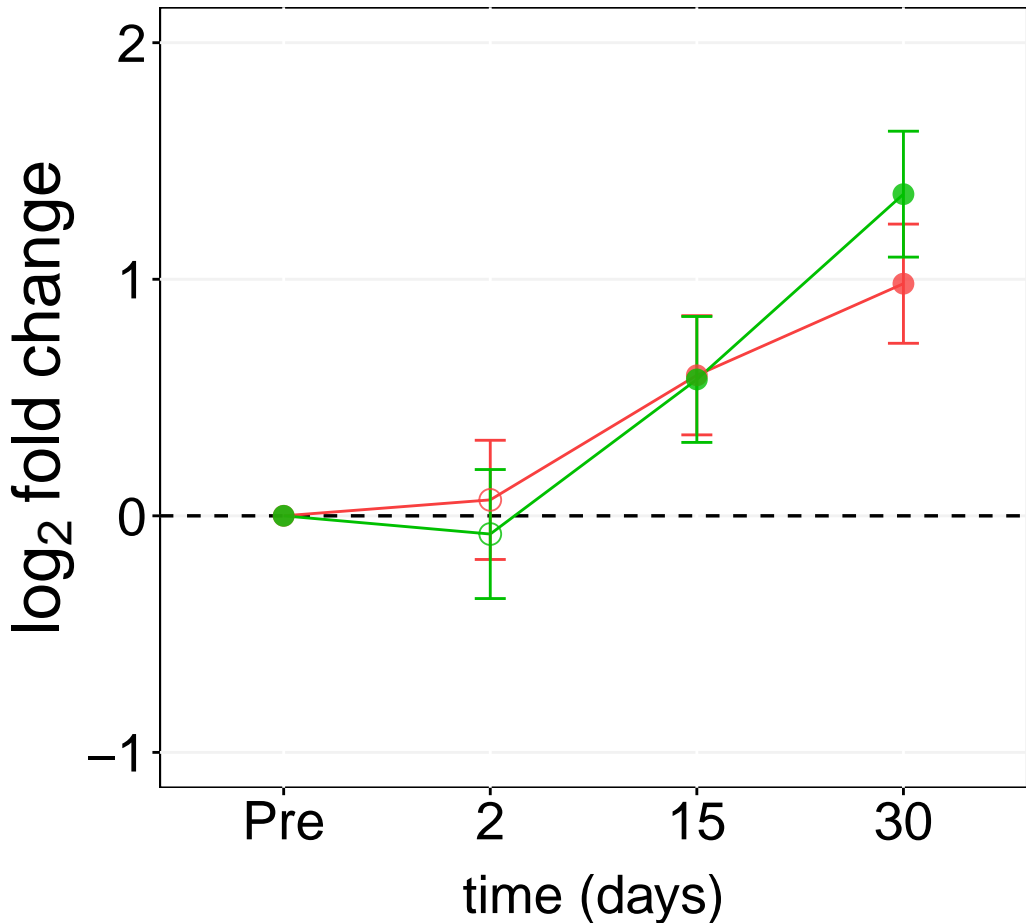

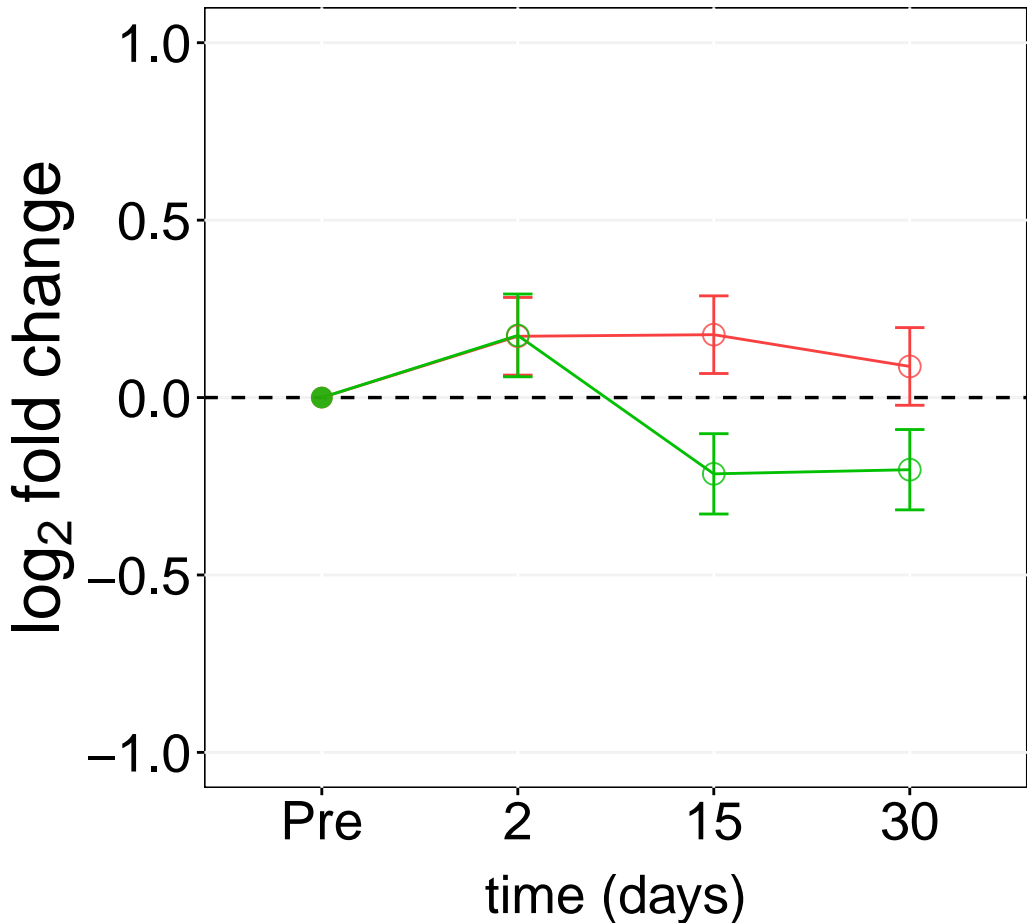

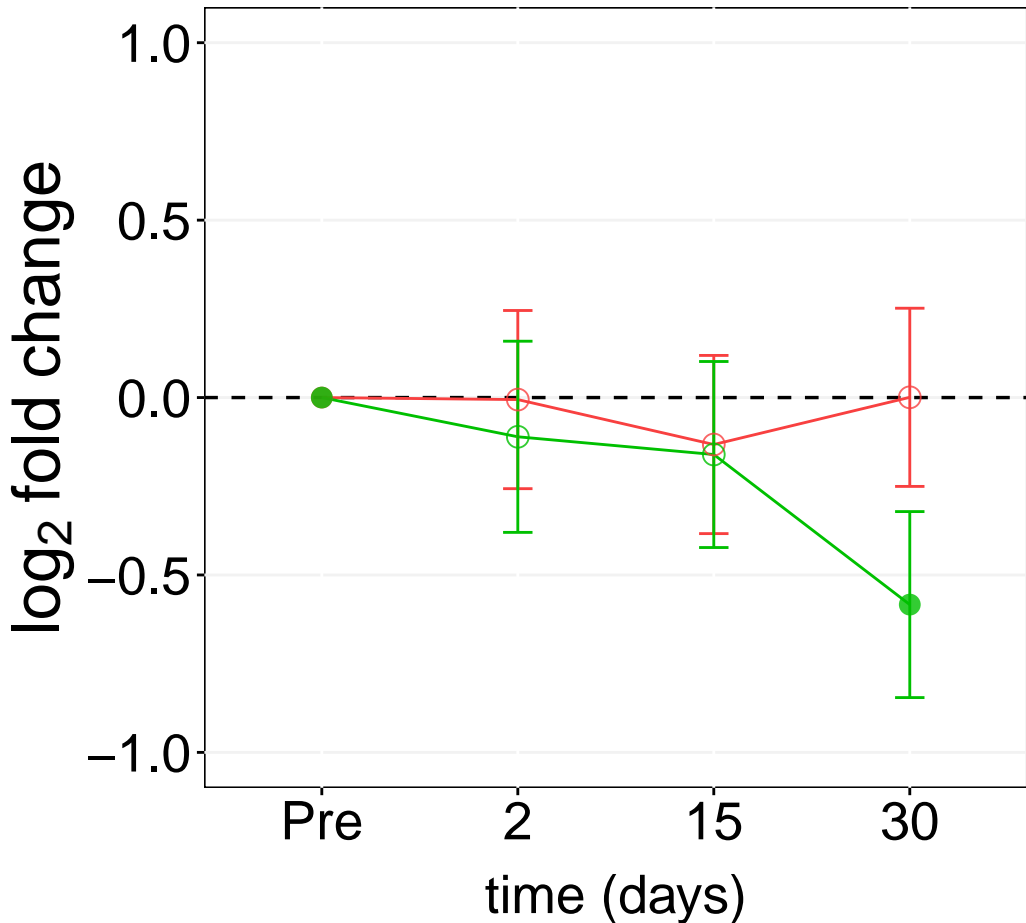

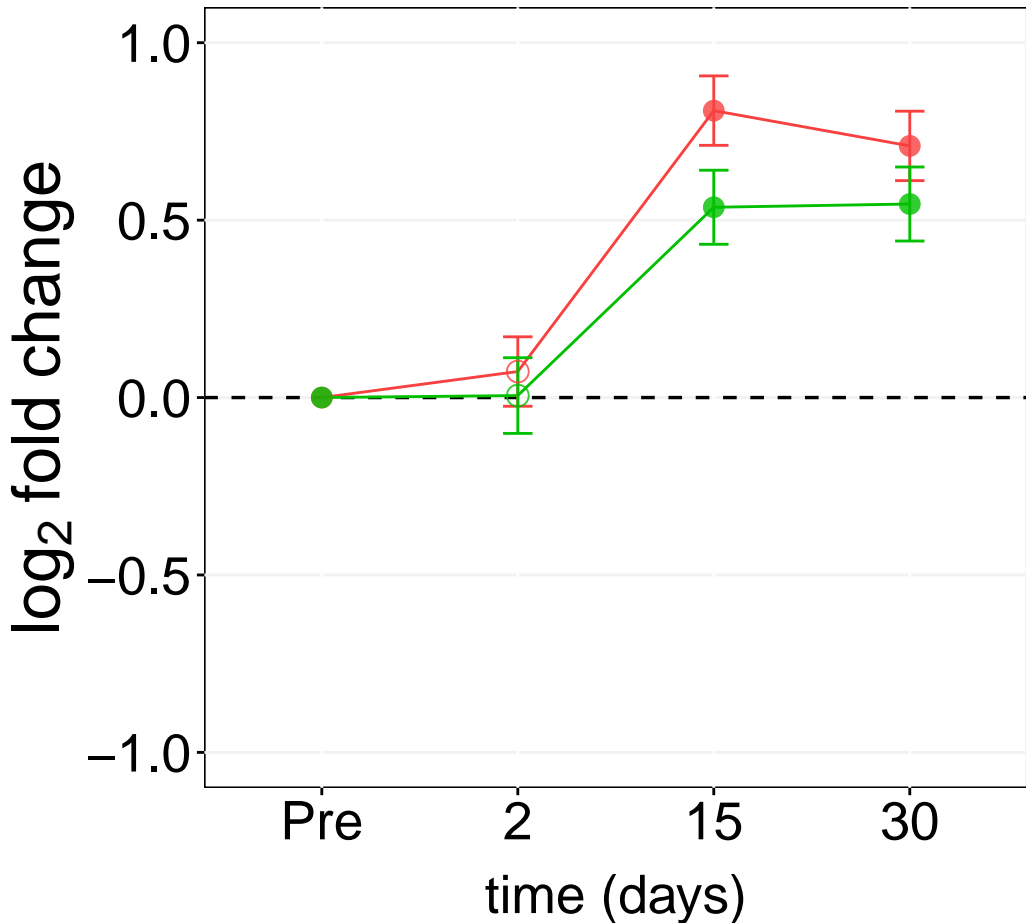

$\log_2$  fold change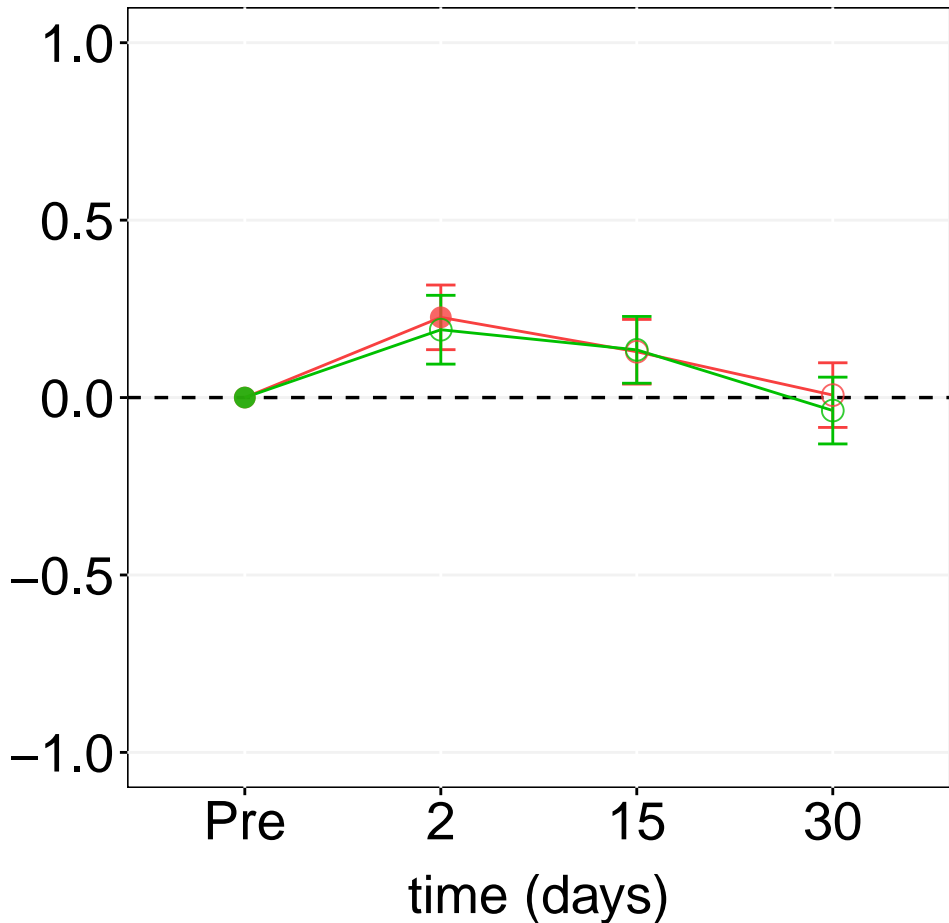

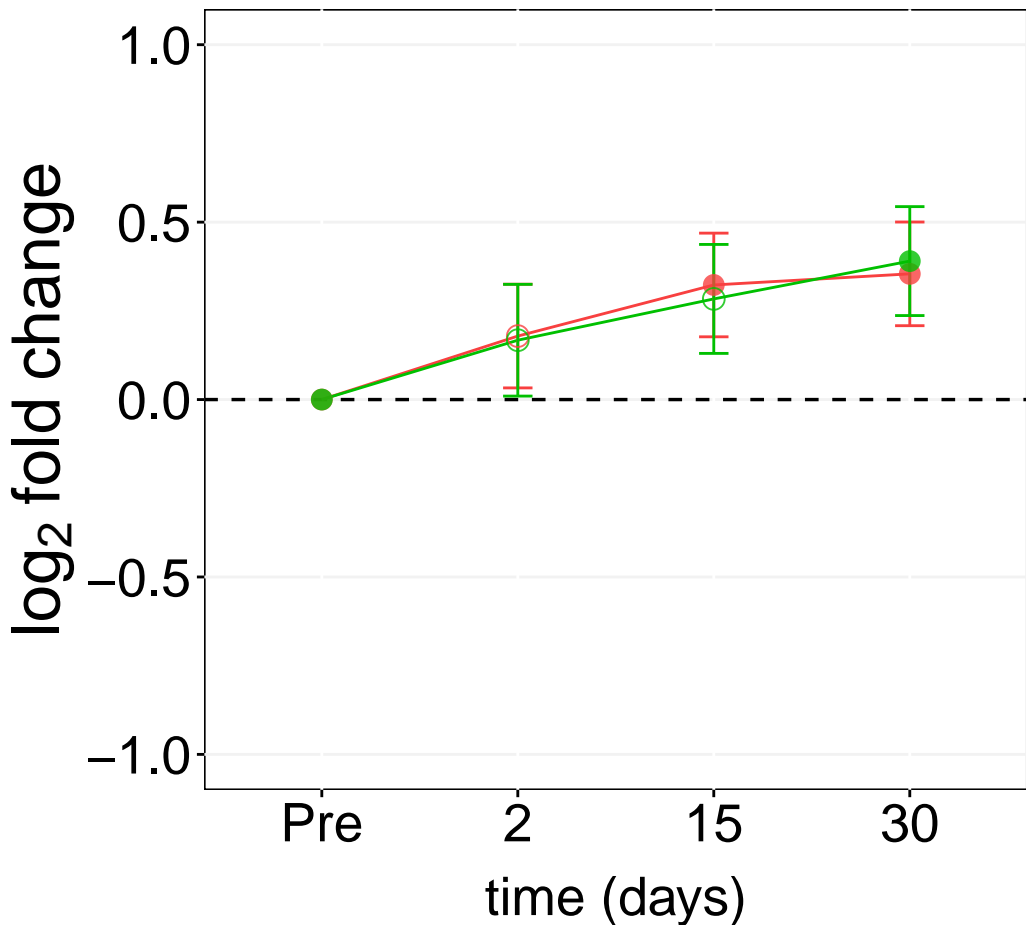

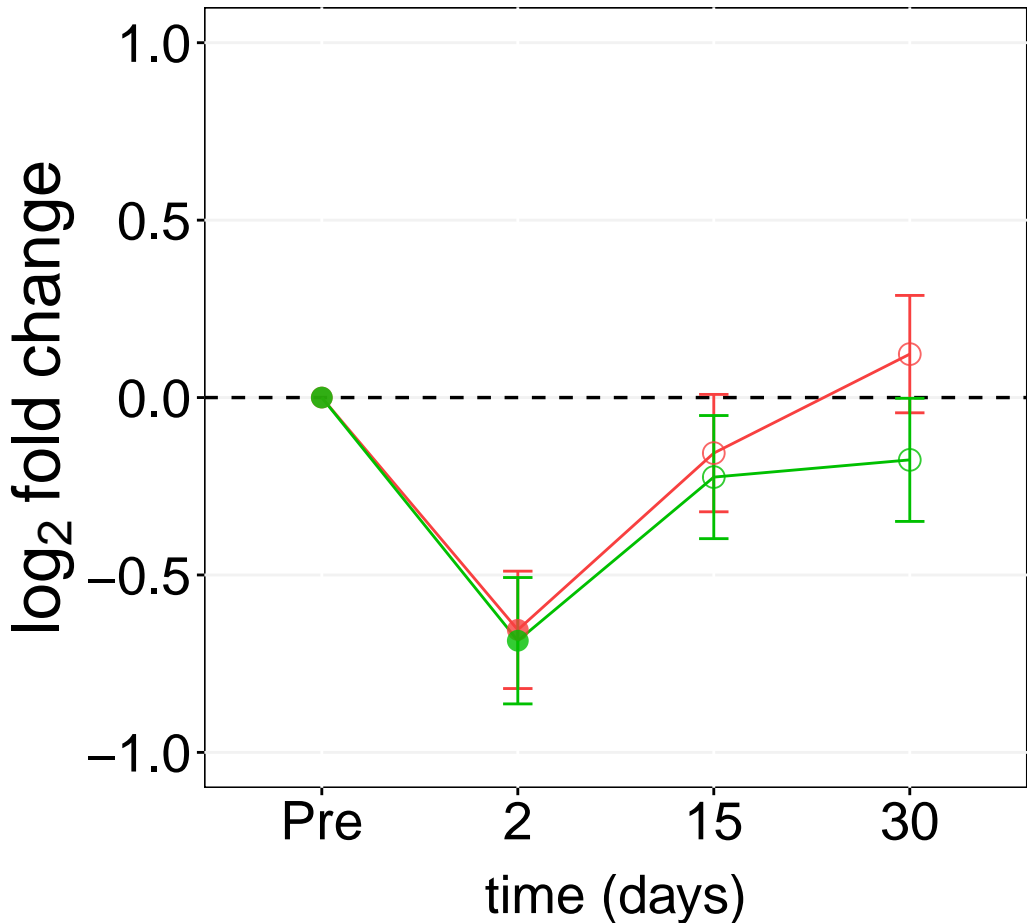



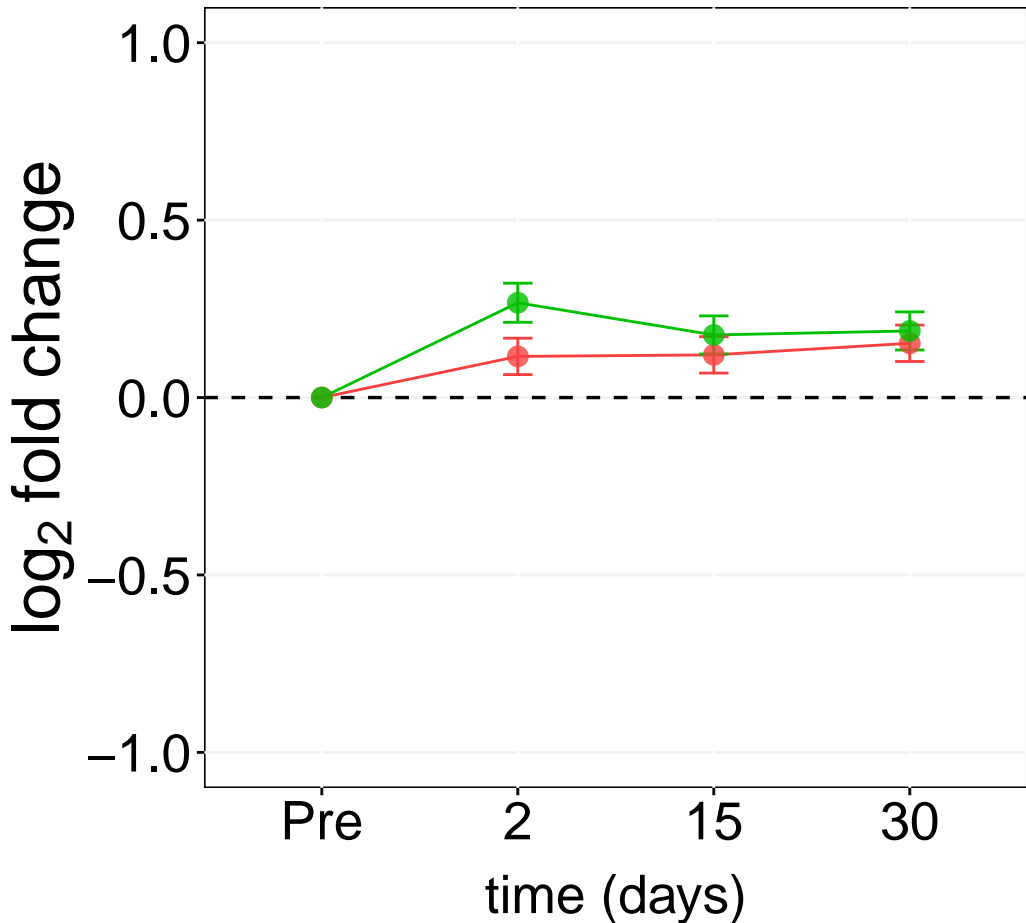

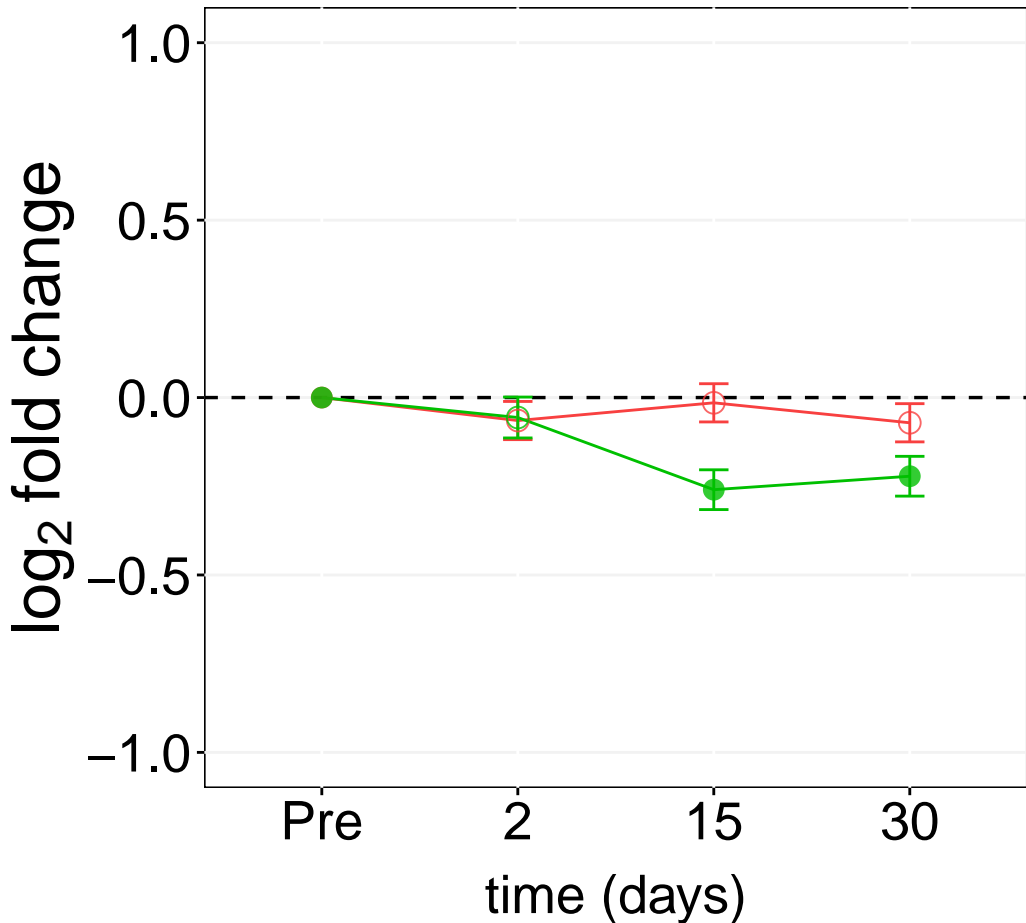

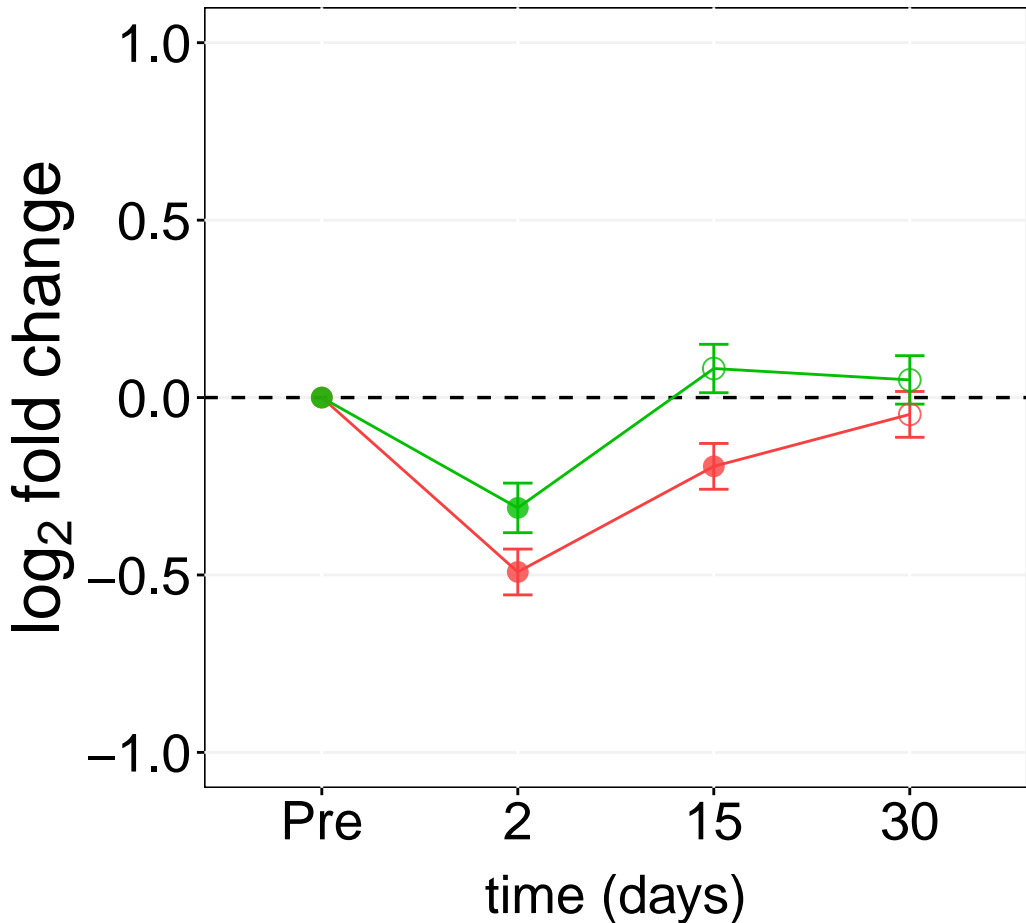

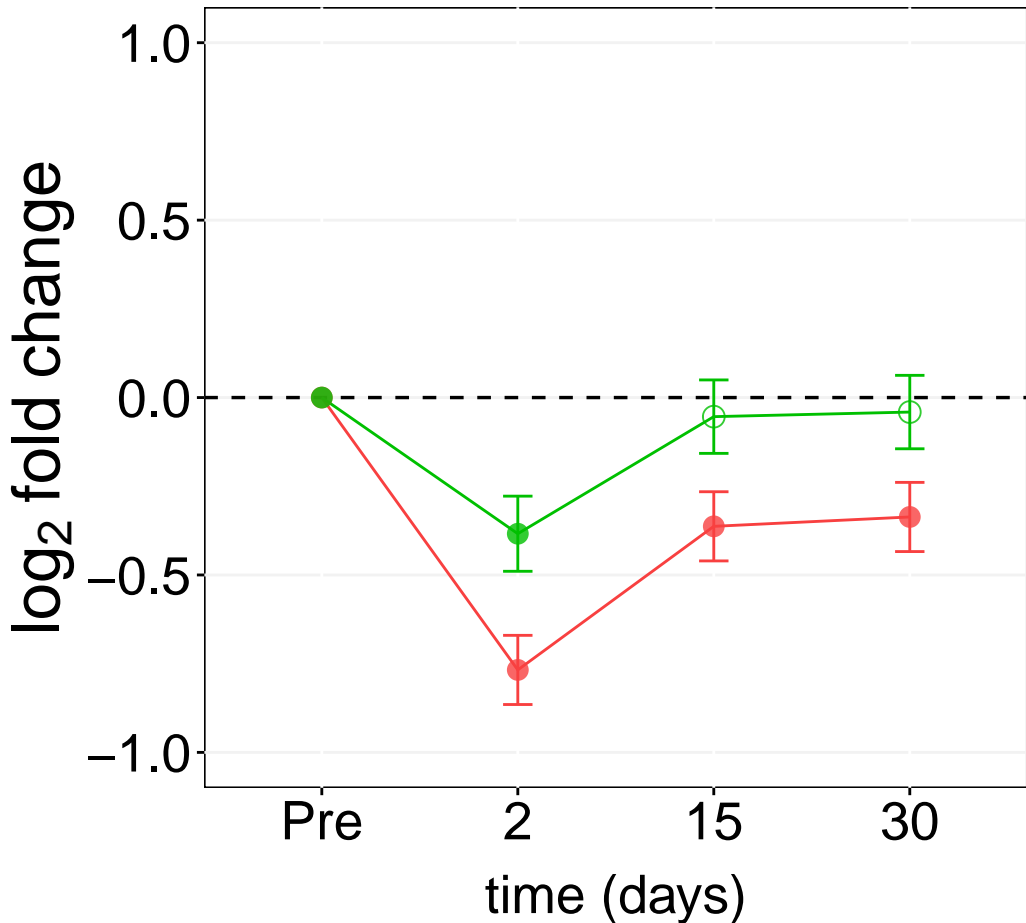

$\log_2$  fold change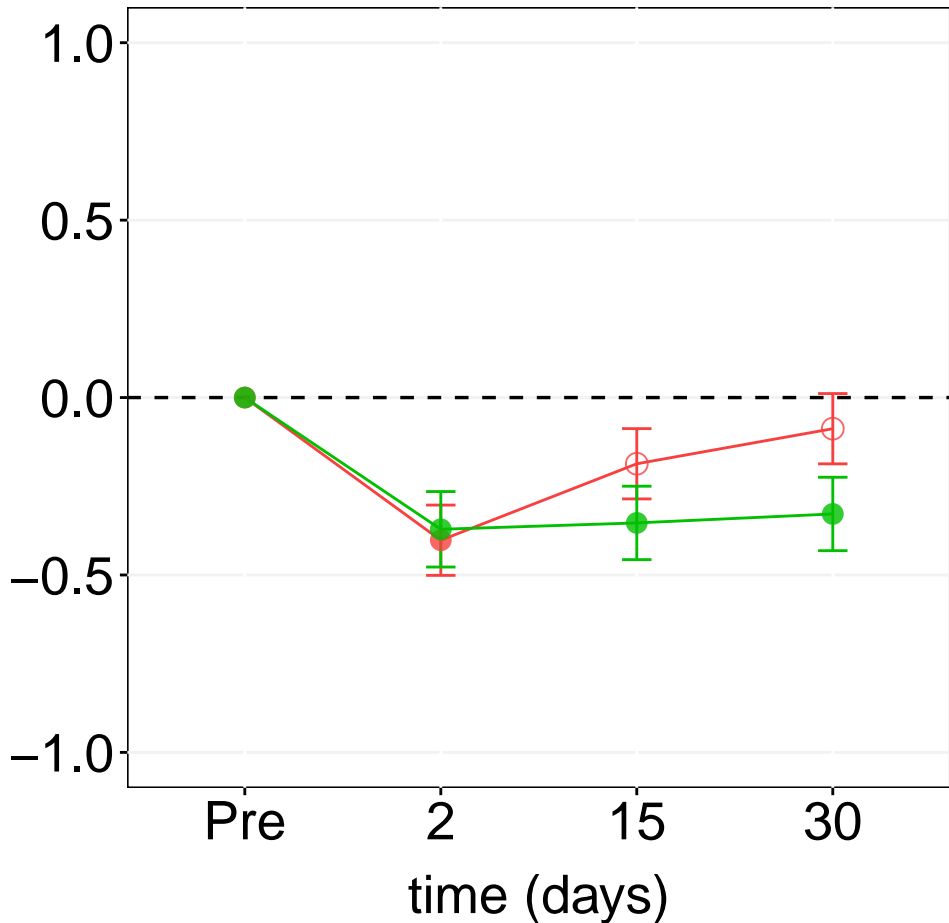

$\log_2$  fold change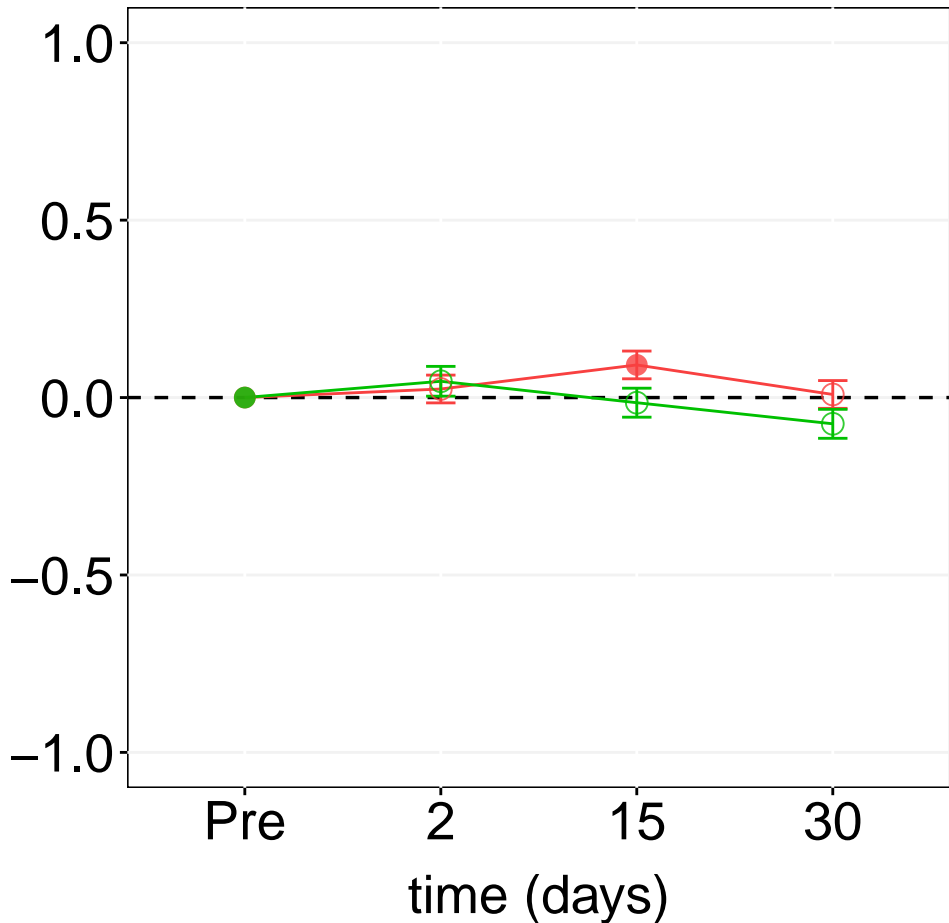

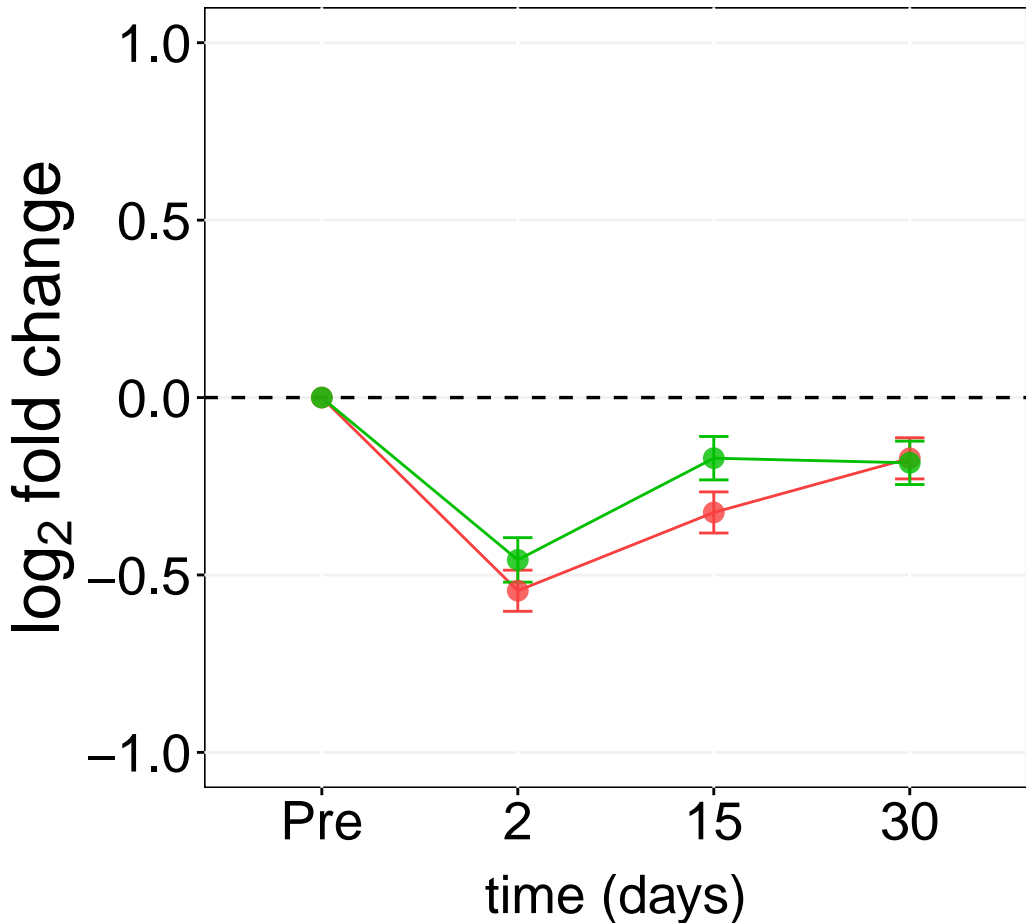

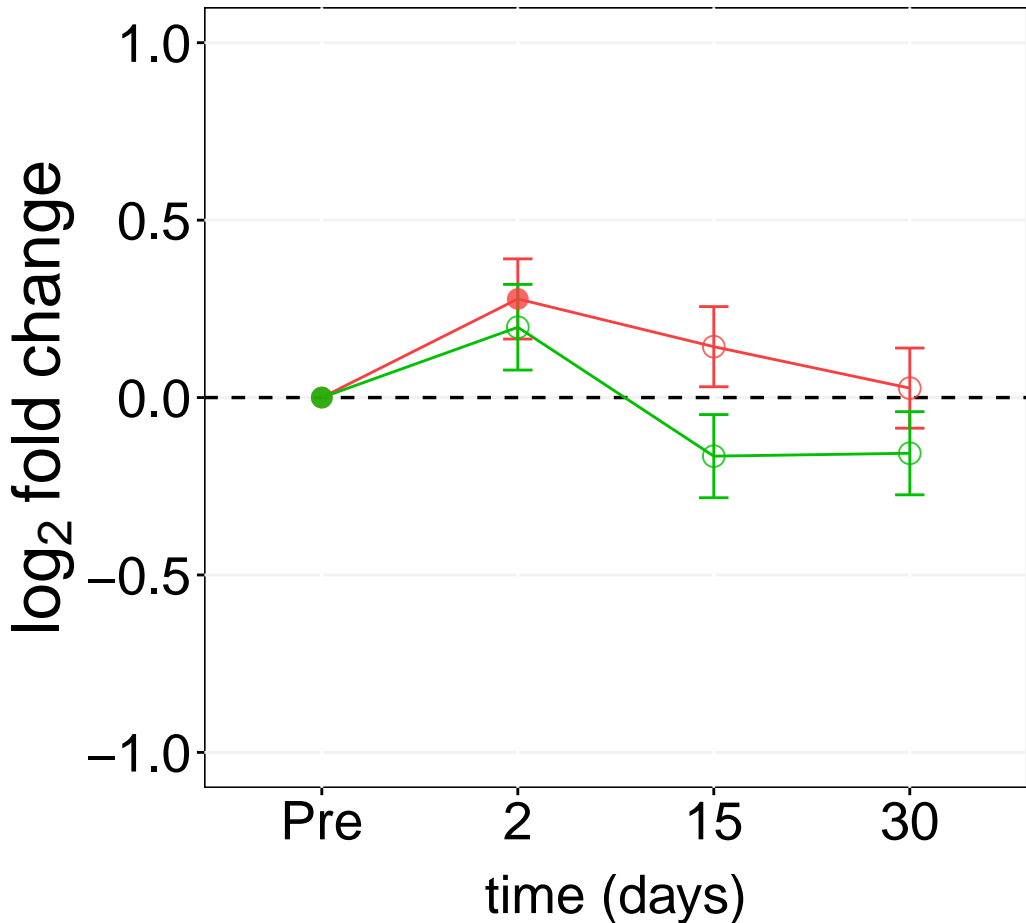



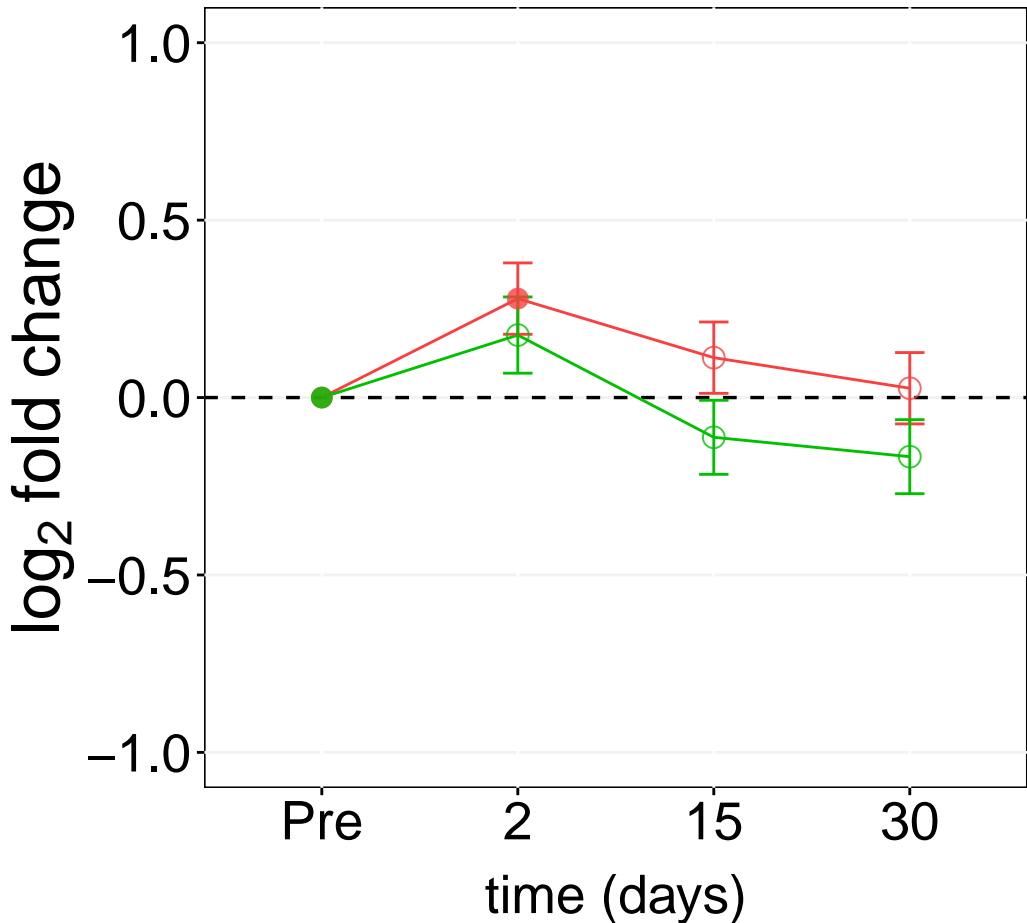

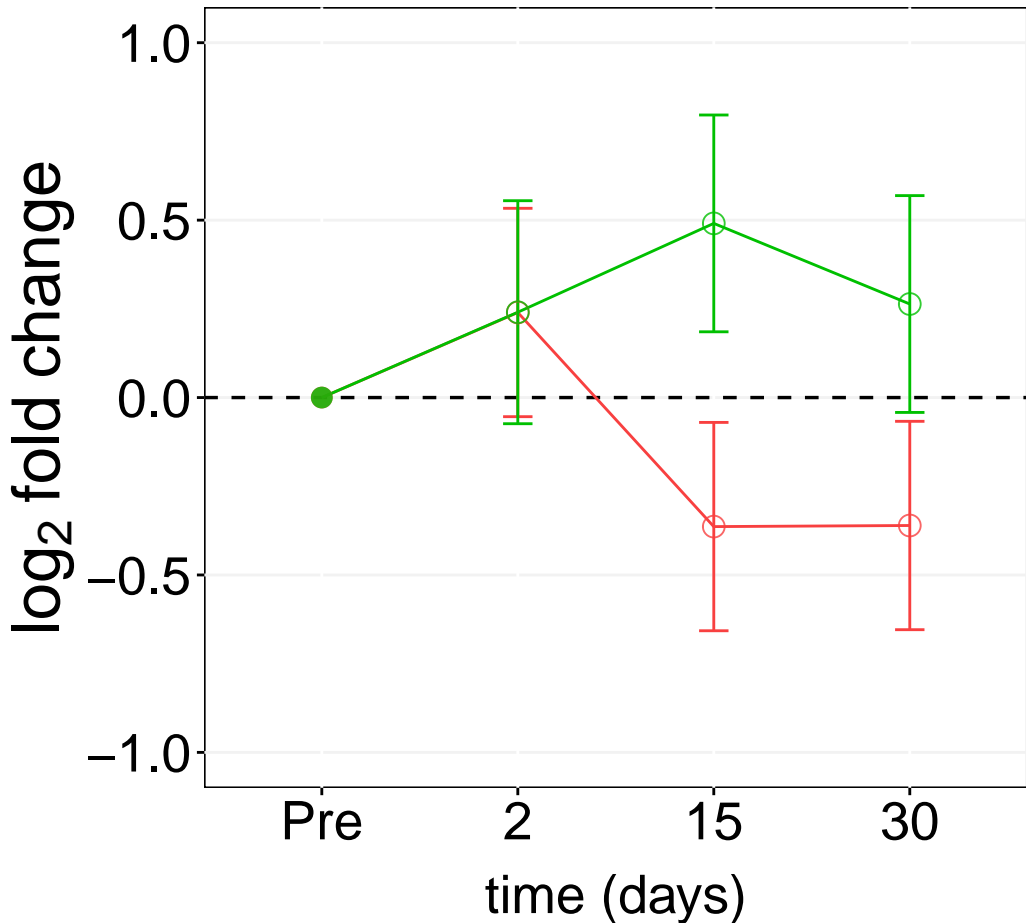

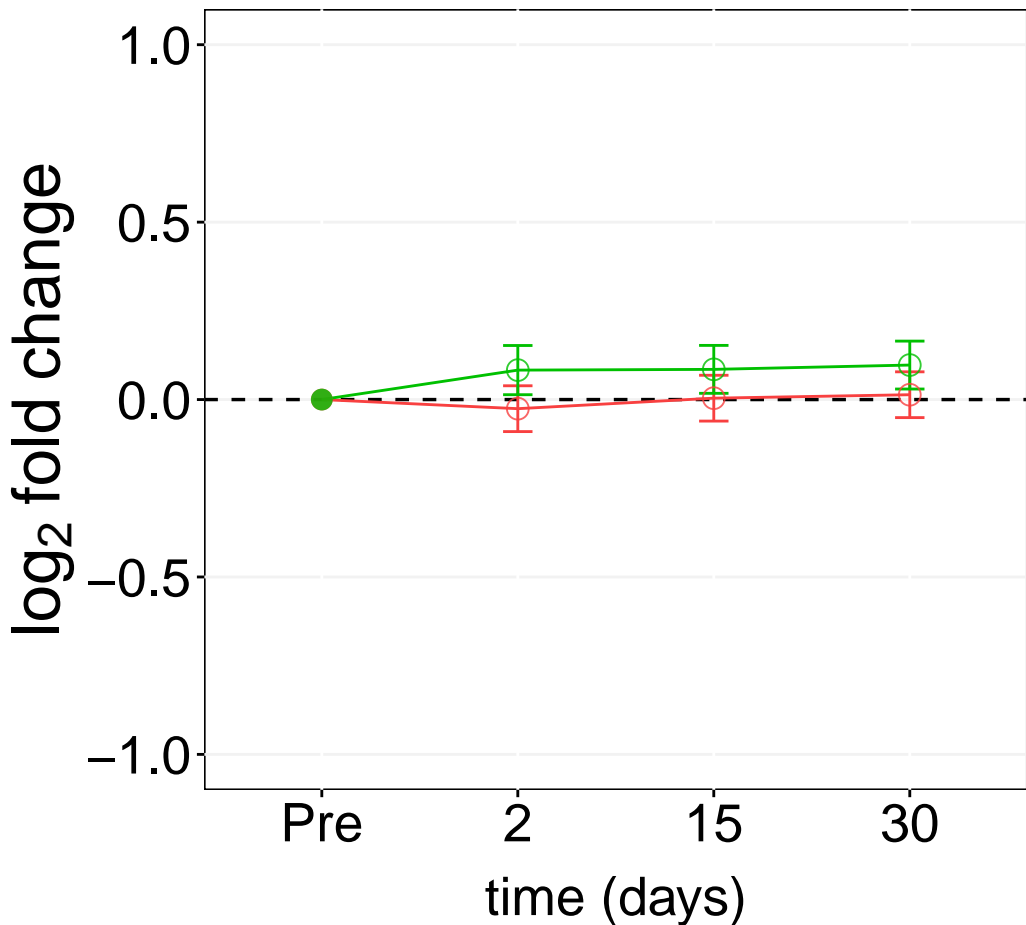

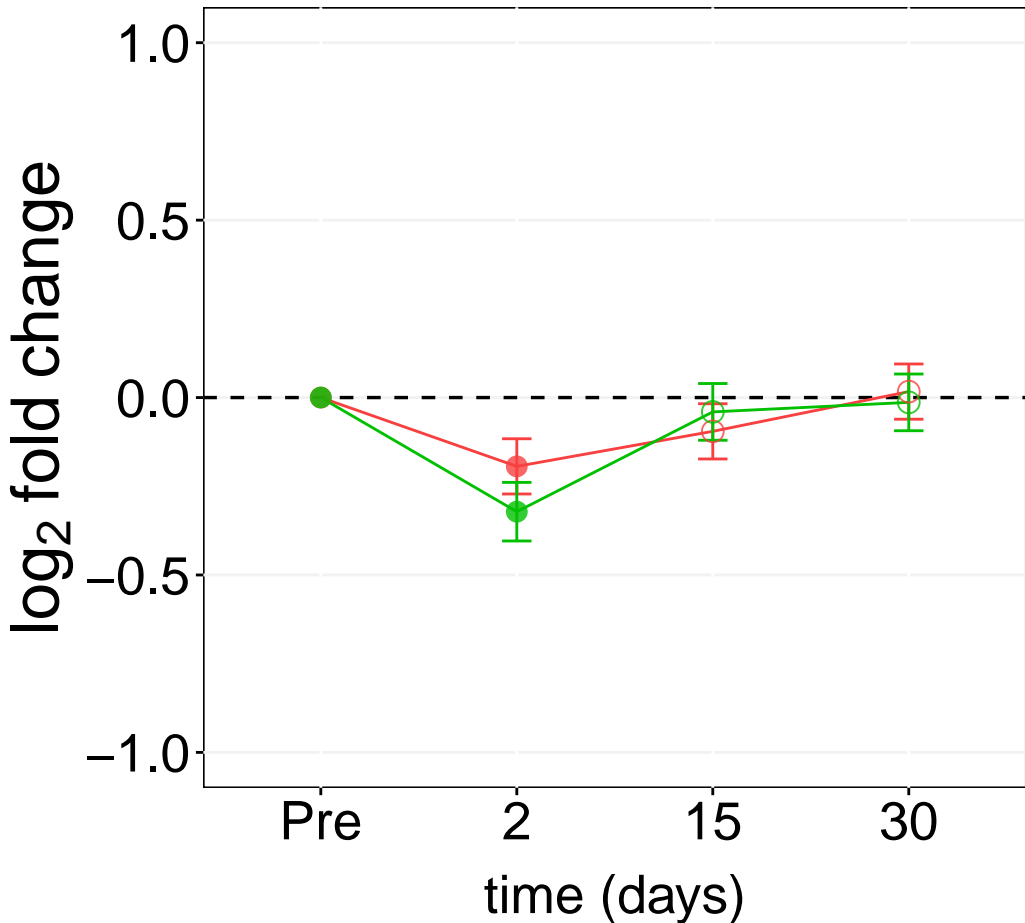

$\log_2$  fold change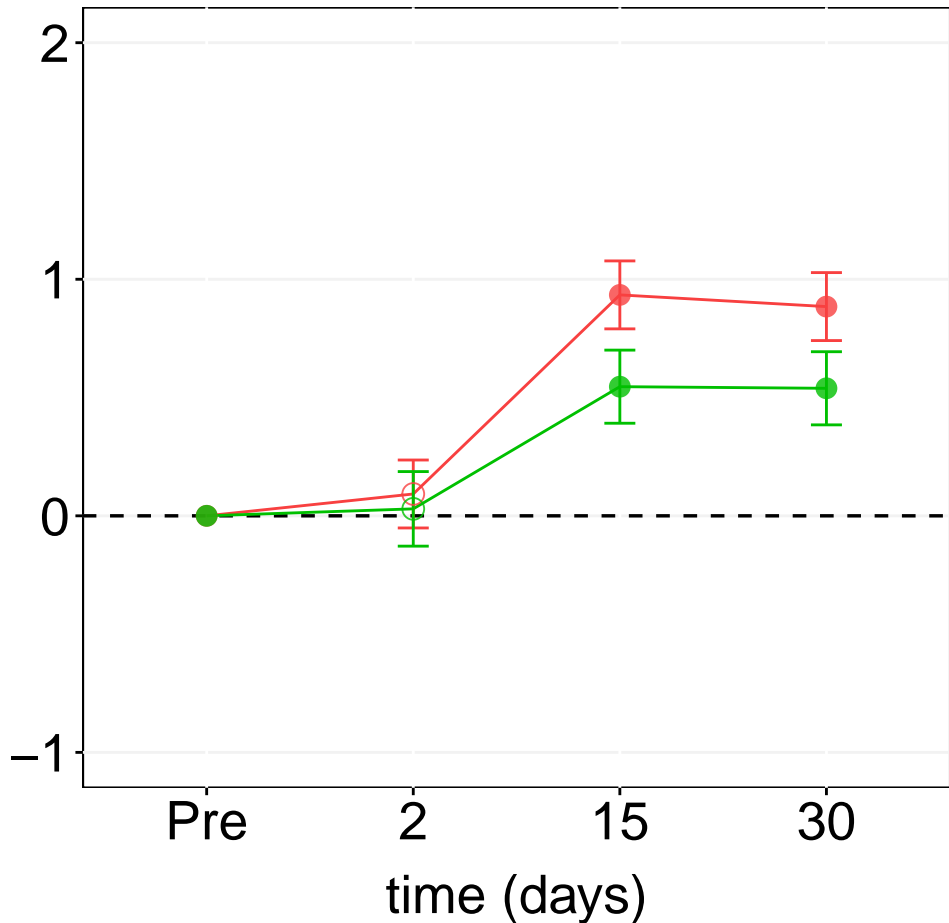

$\log_2$  fold change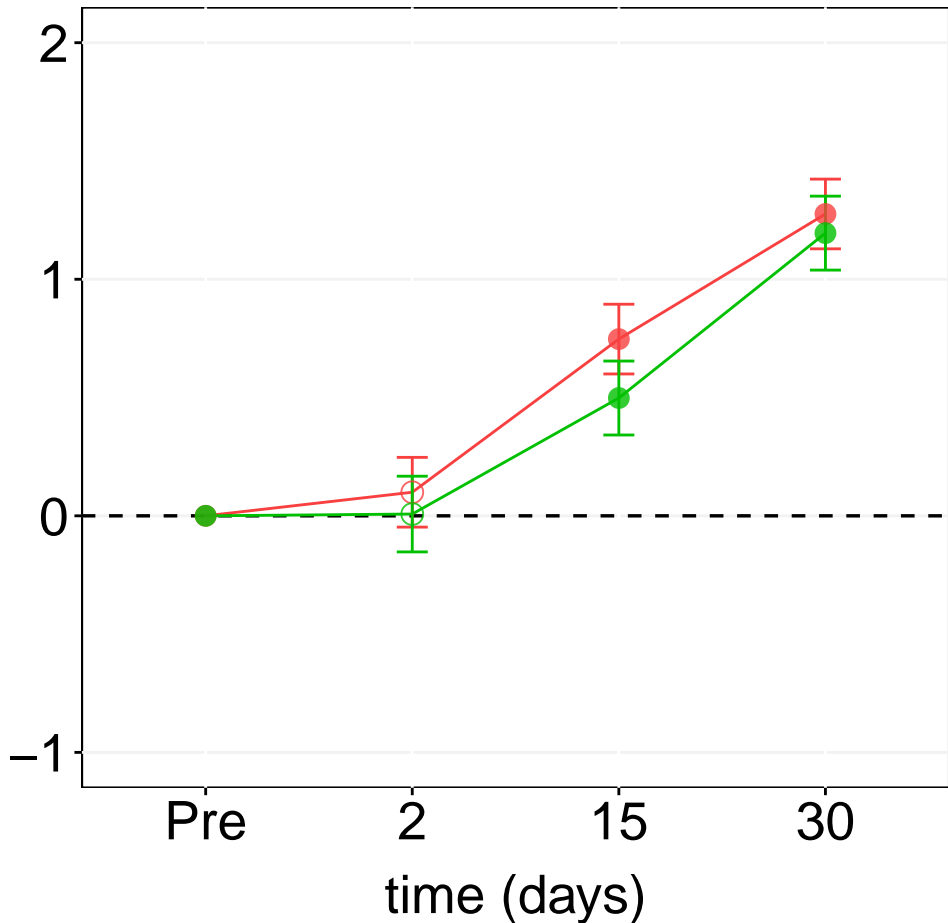

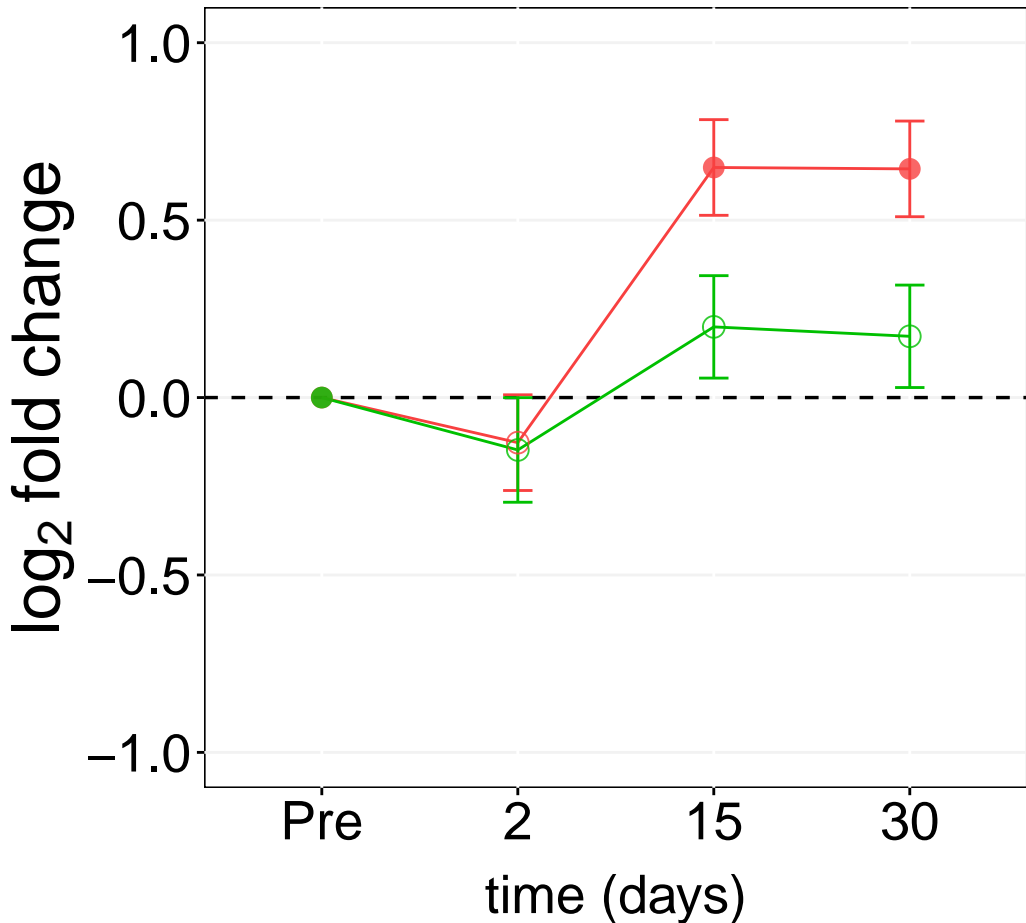

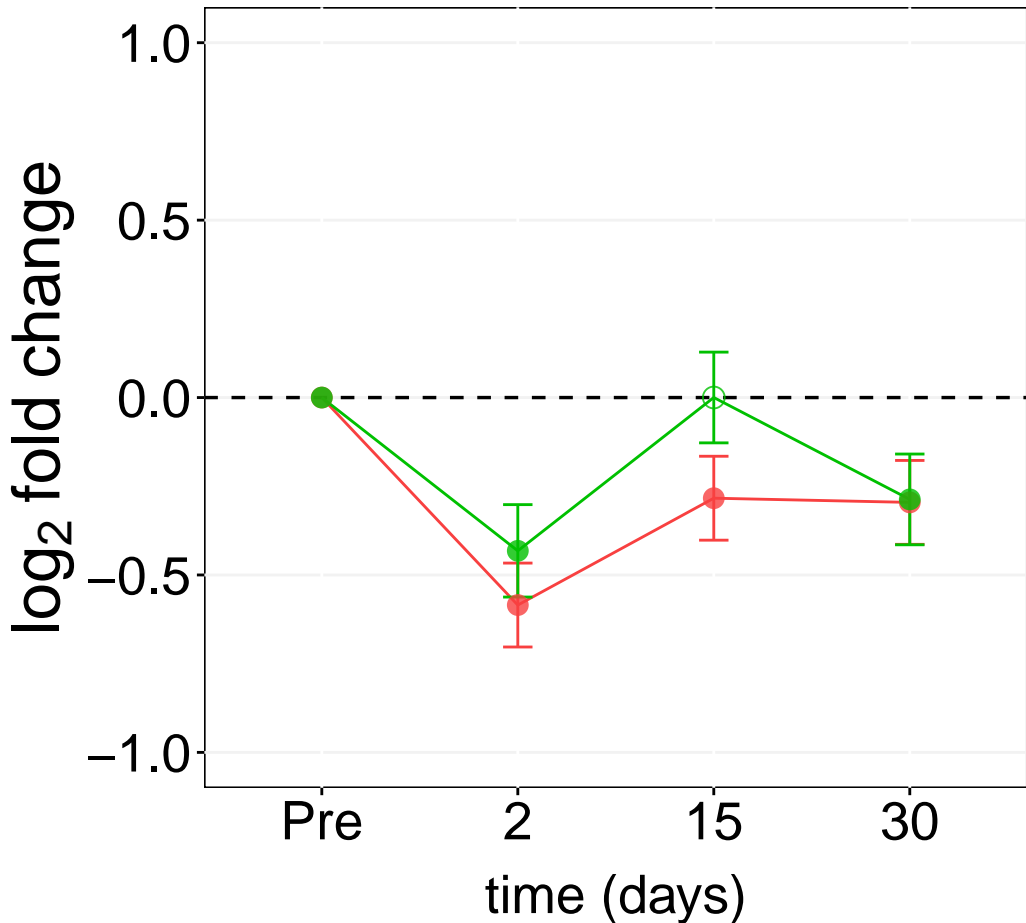



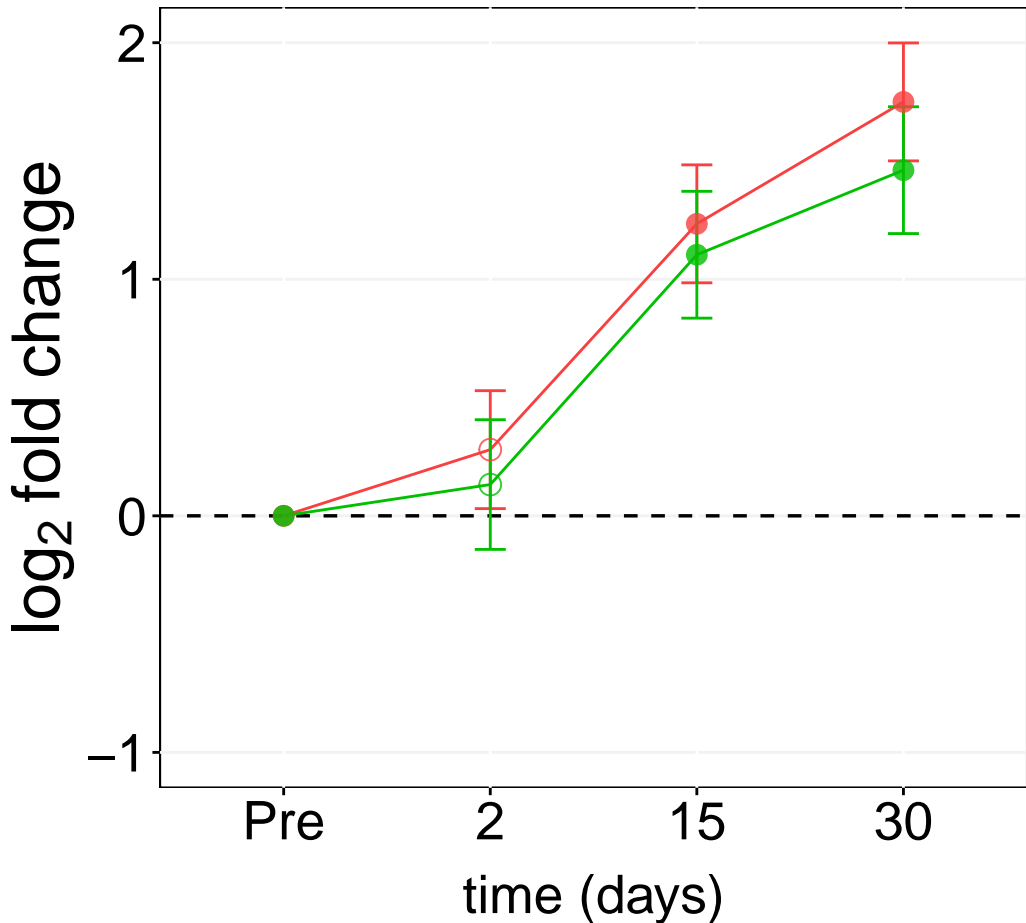

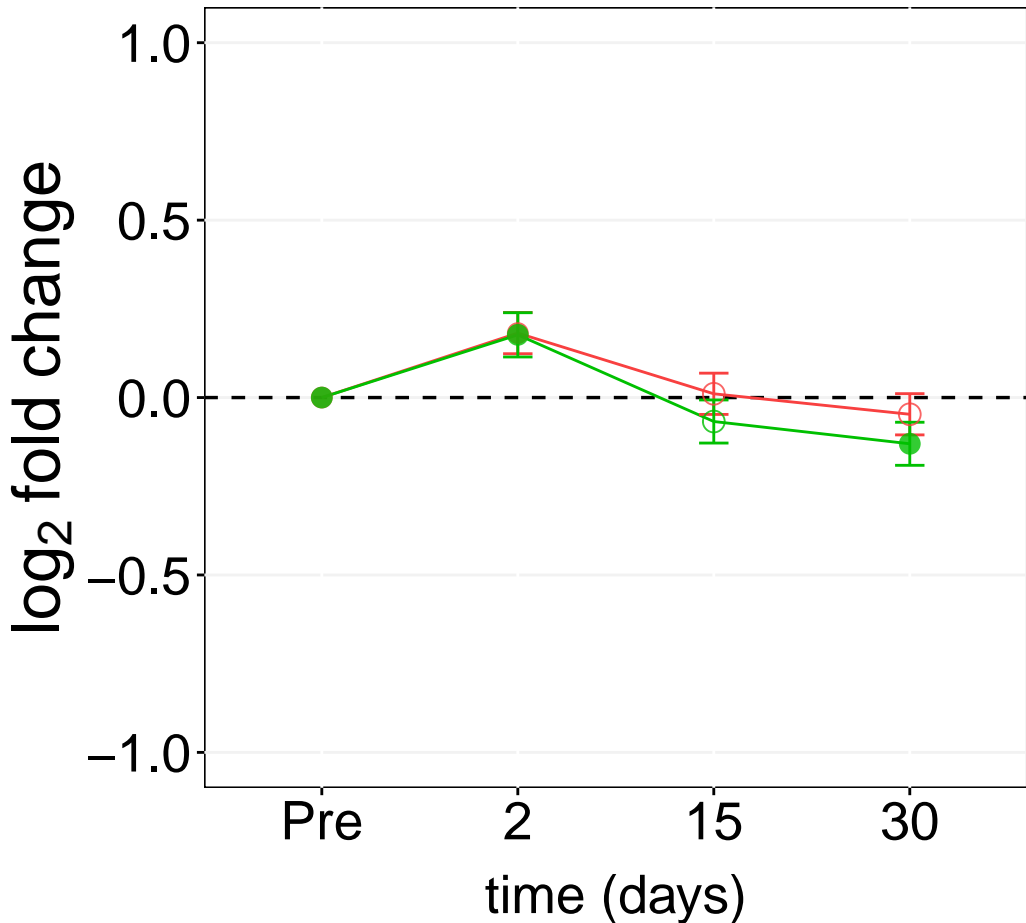

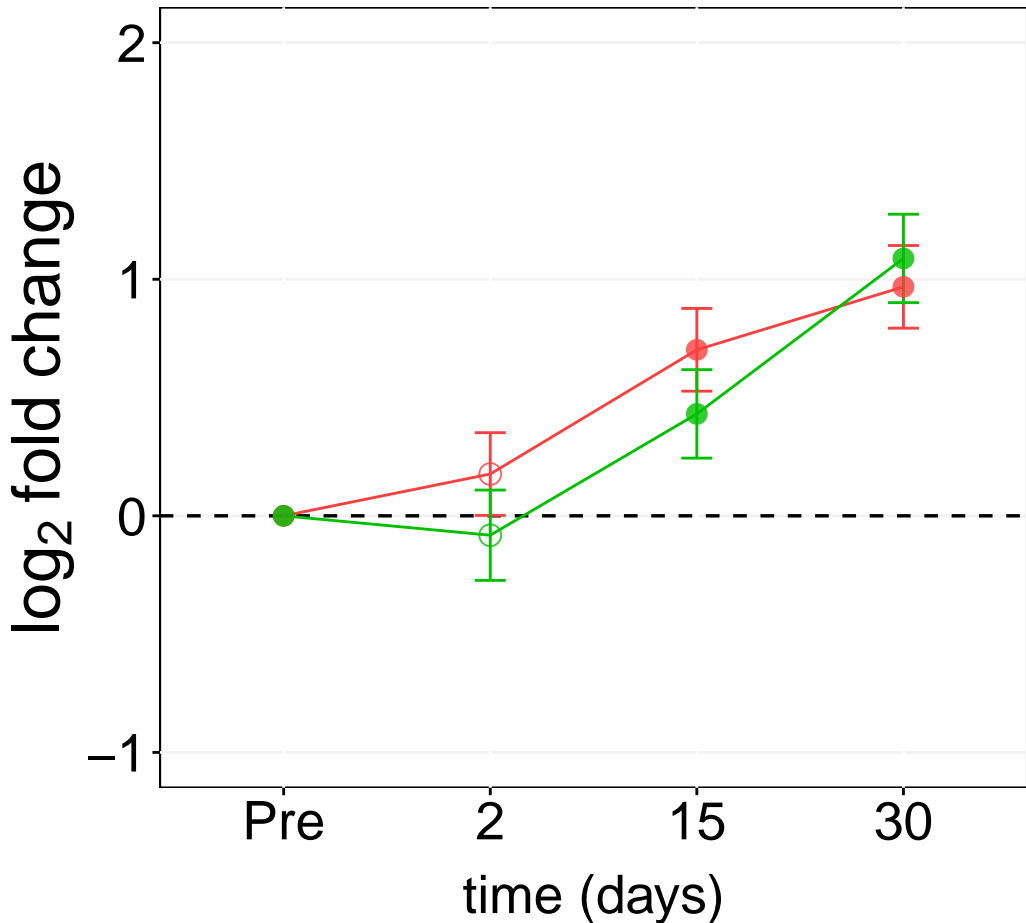

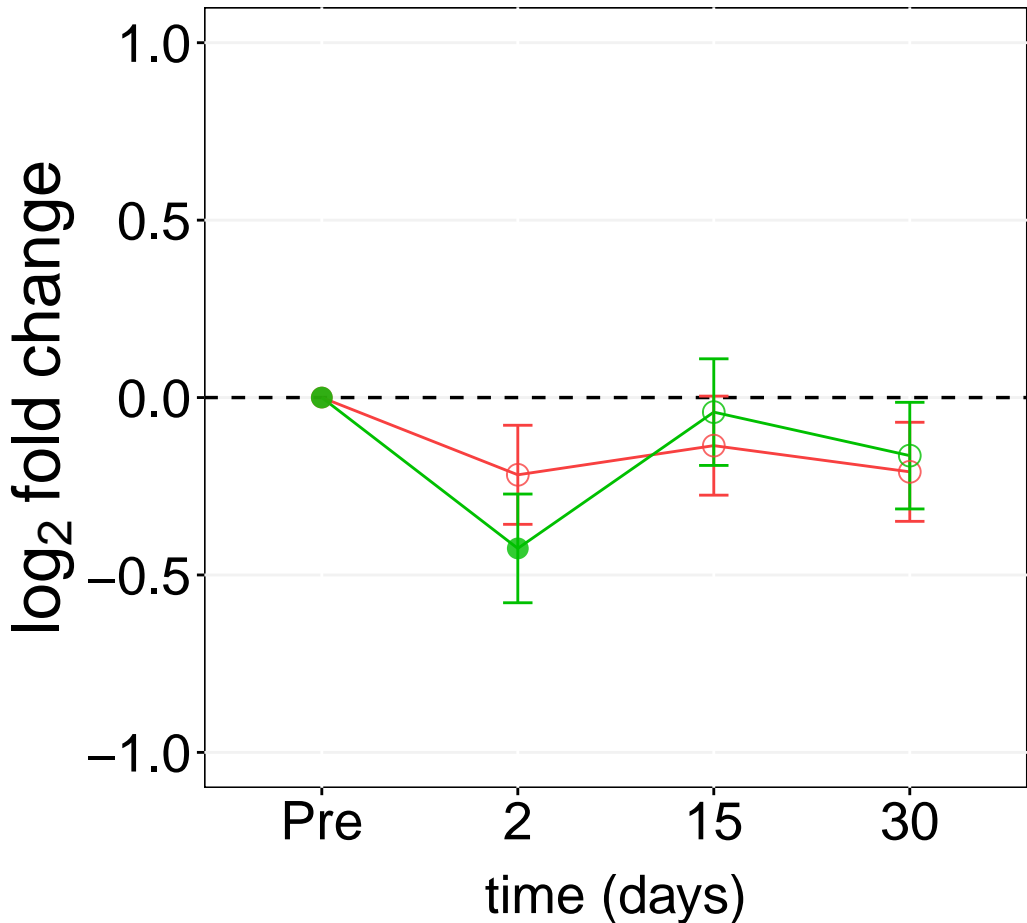

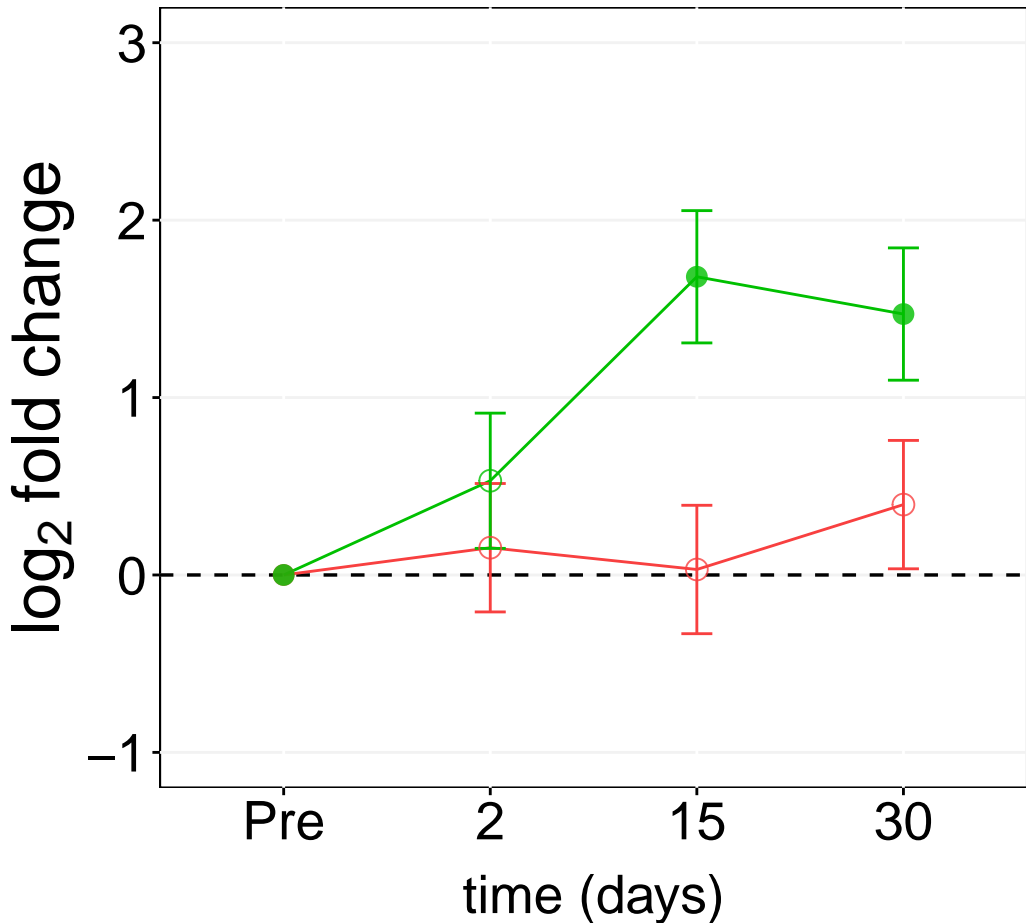

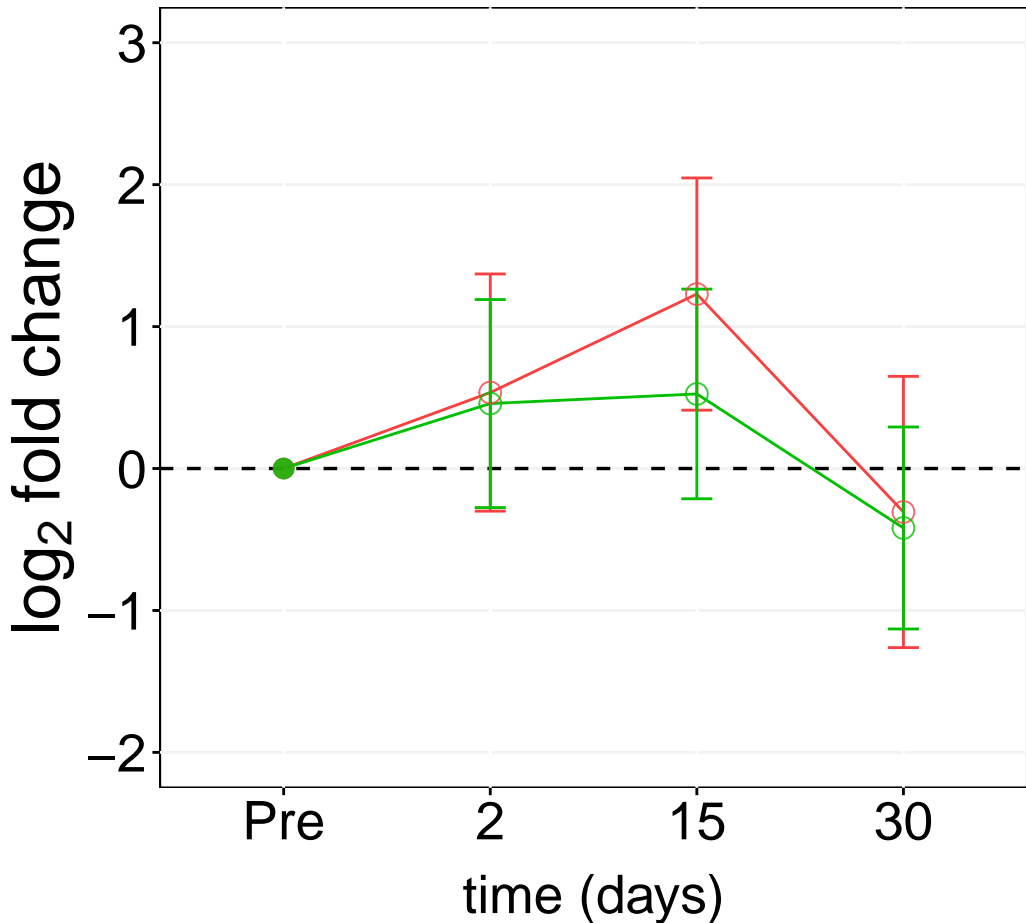

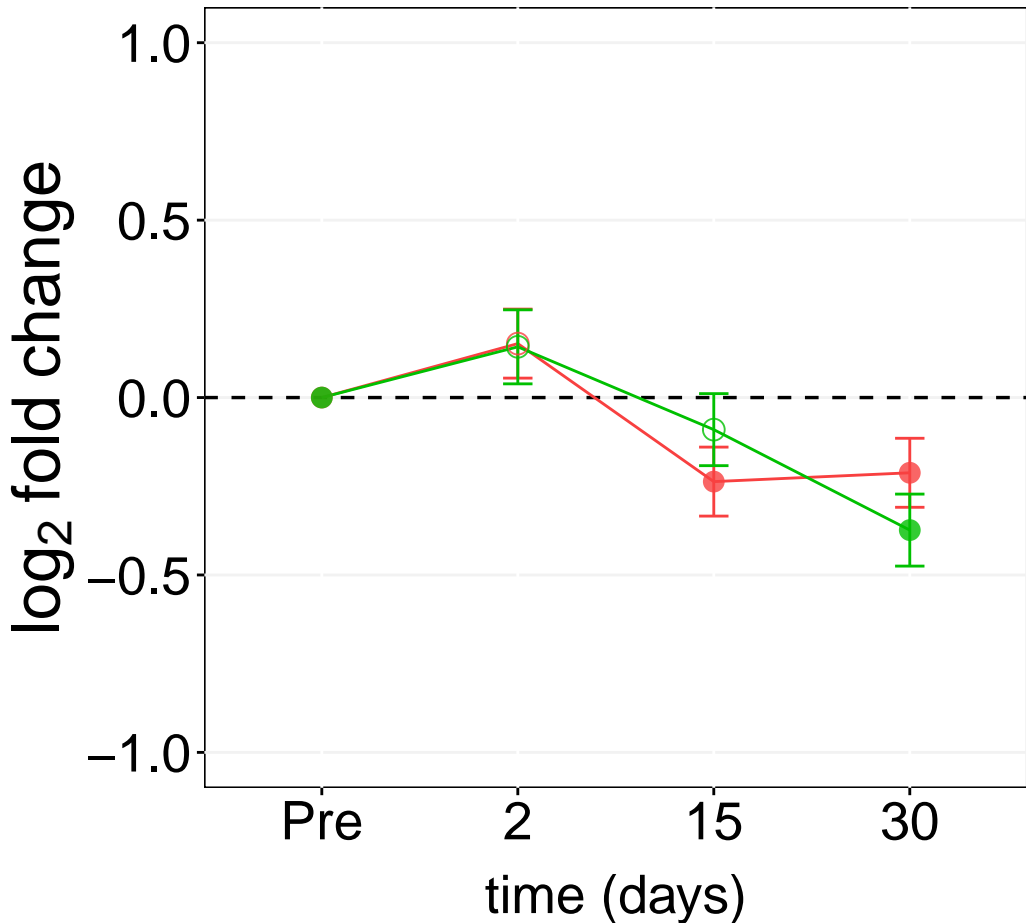

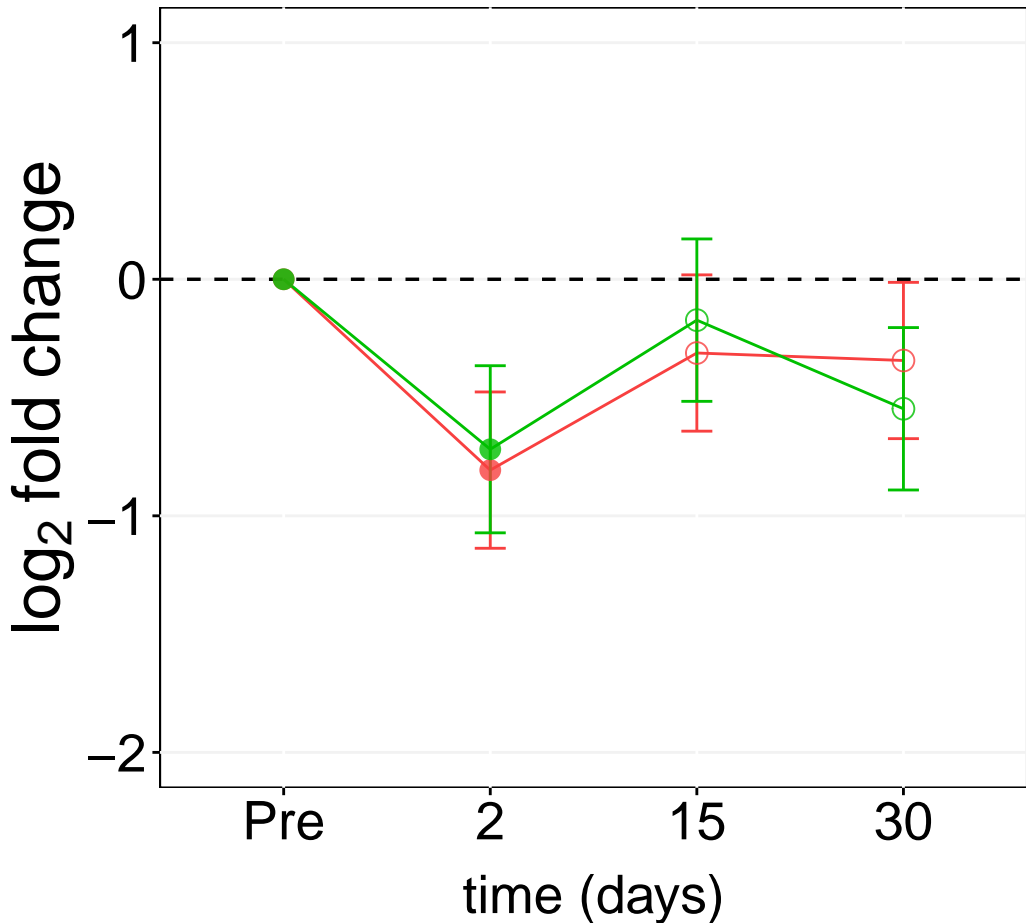



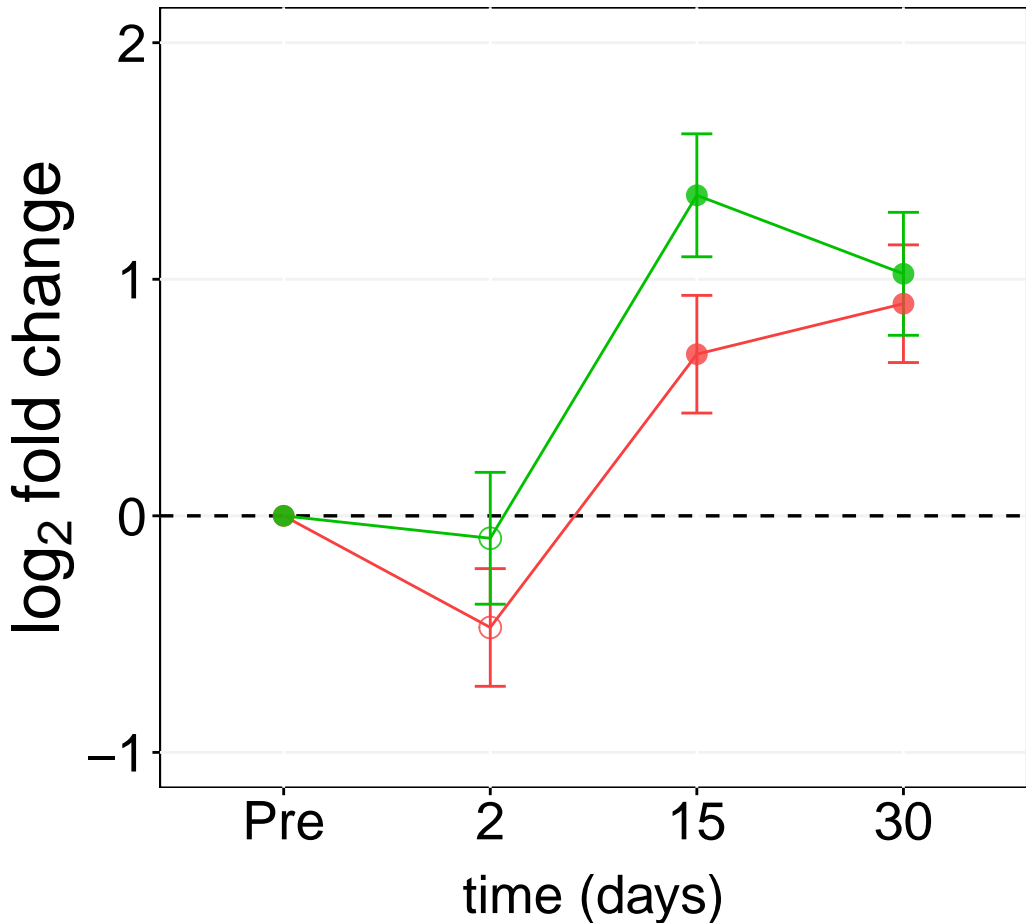

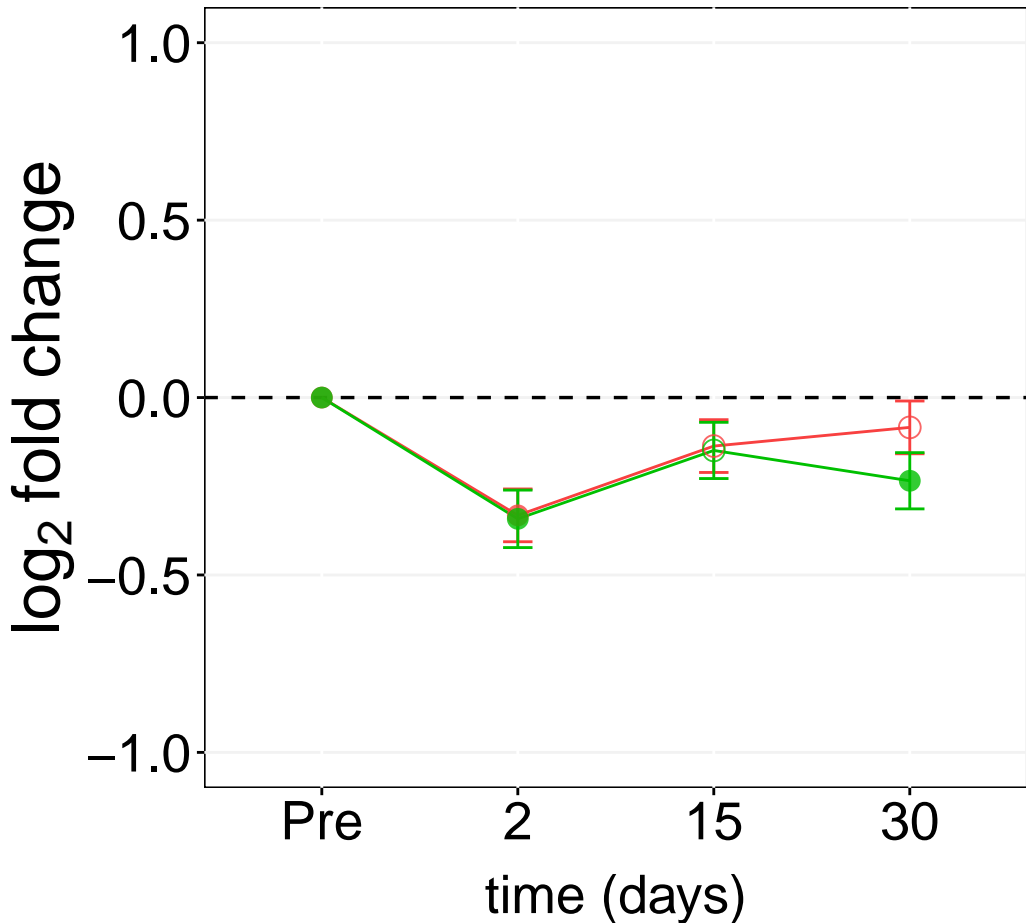

$\log_2$  fold change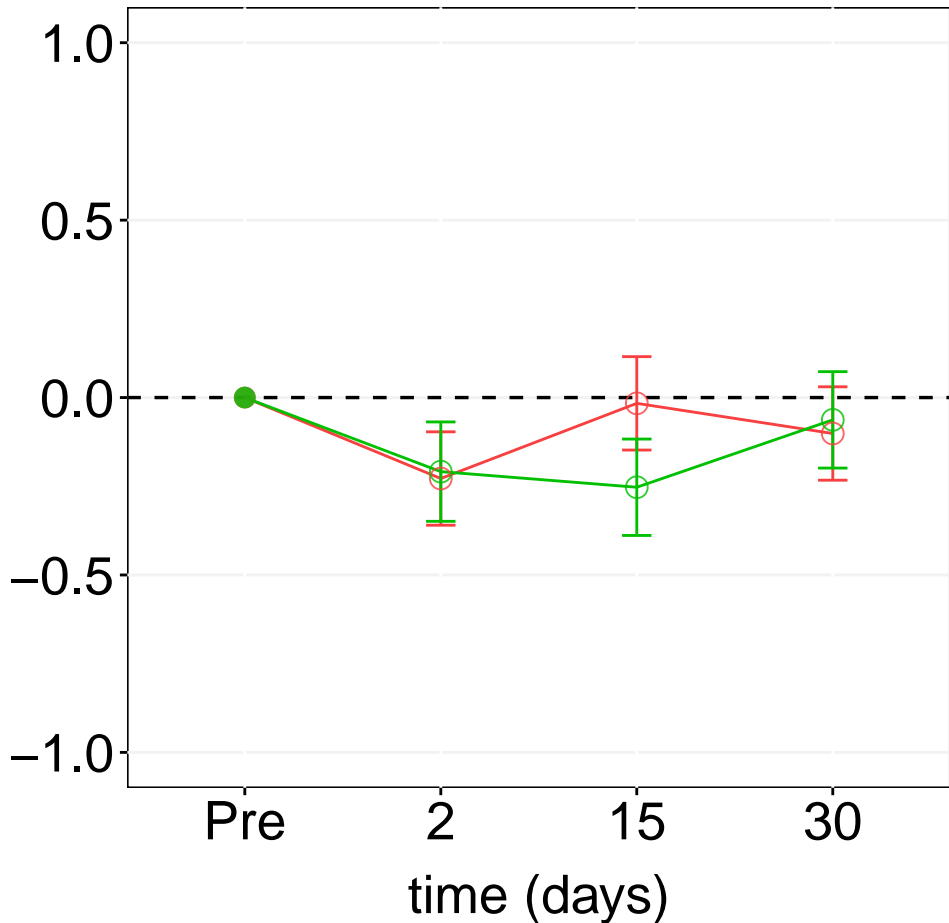

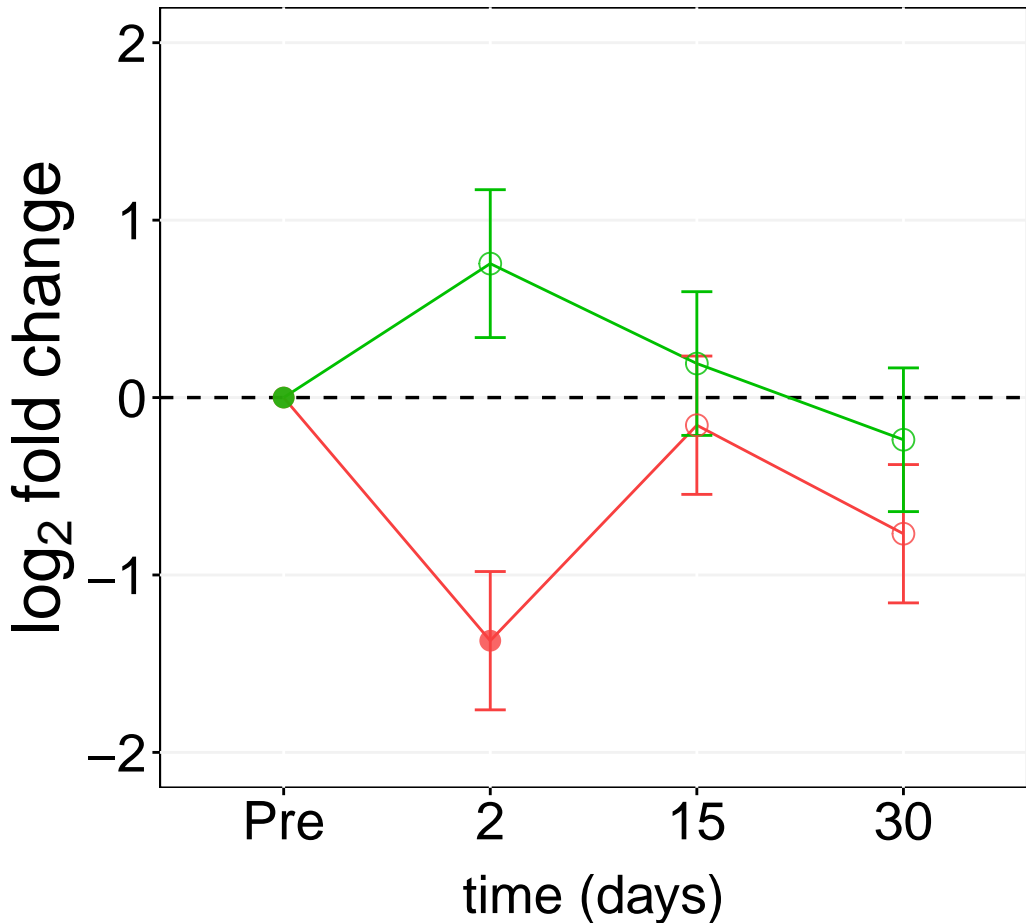

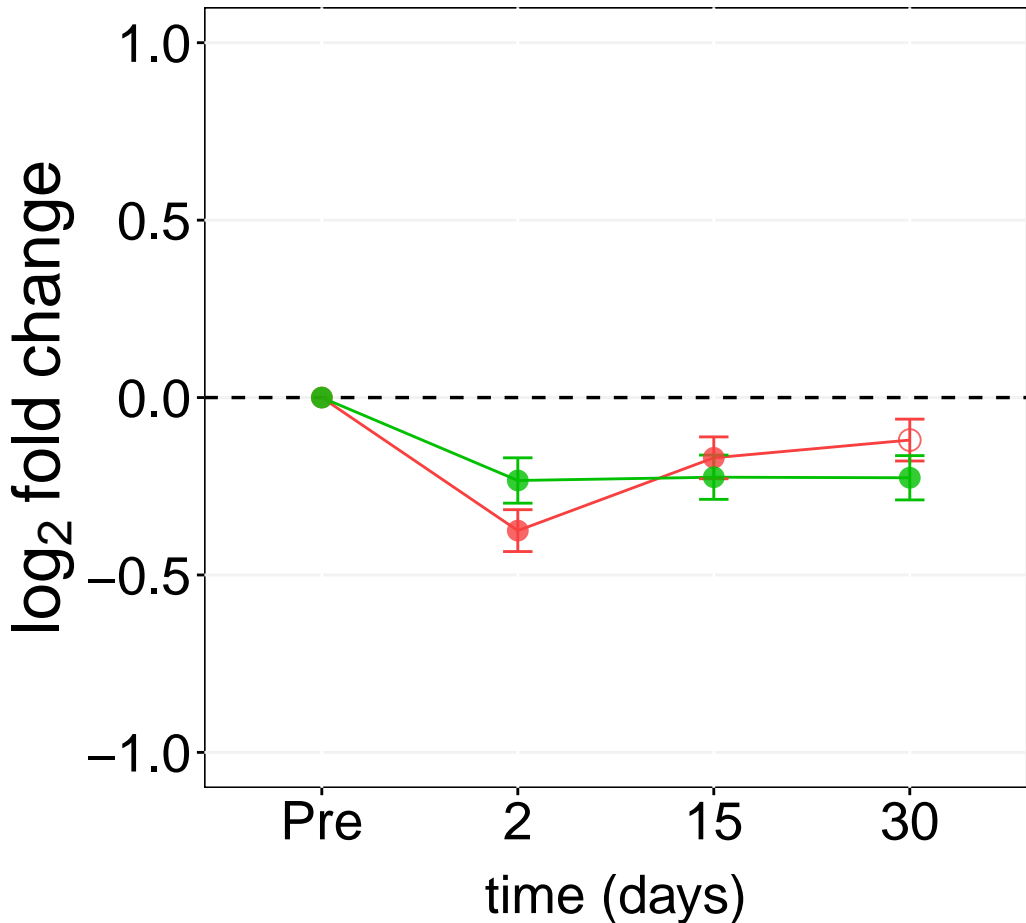

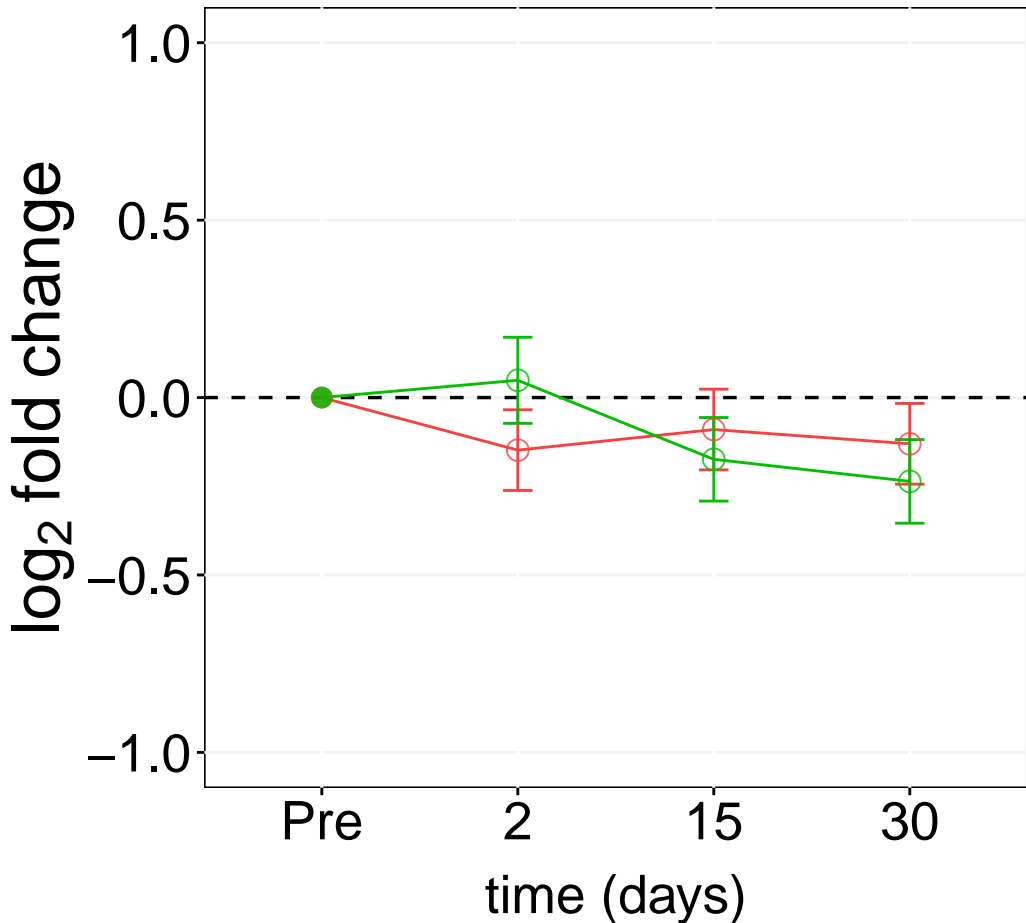

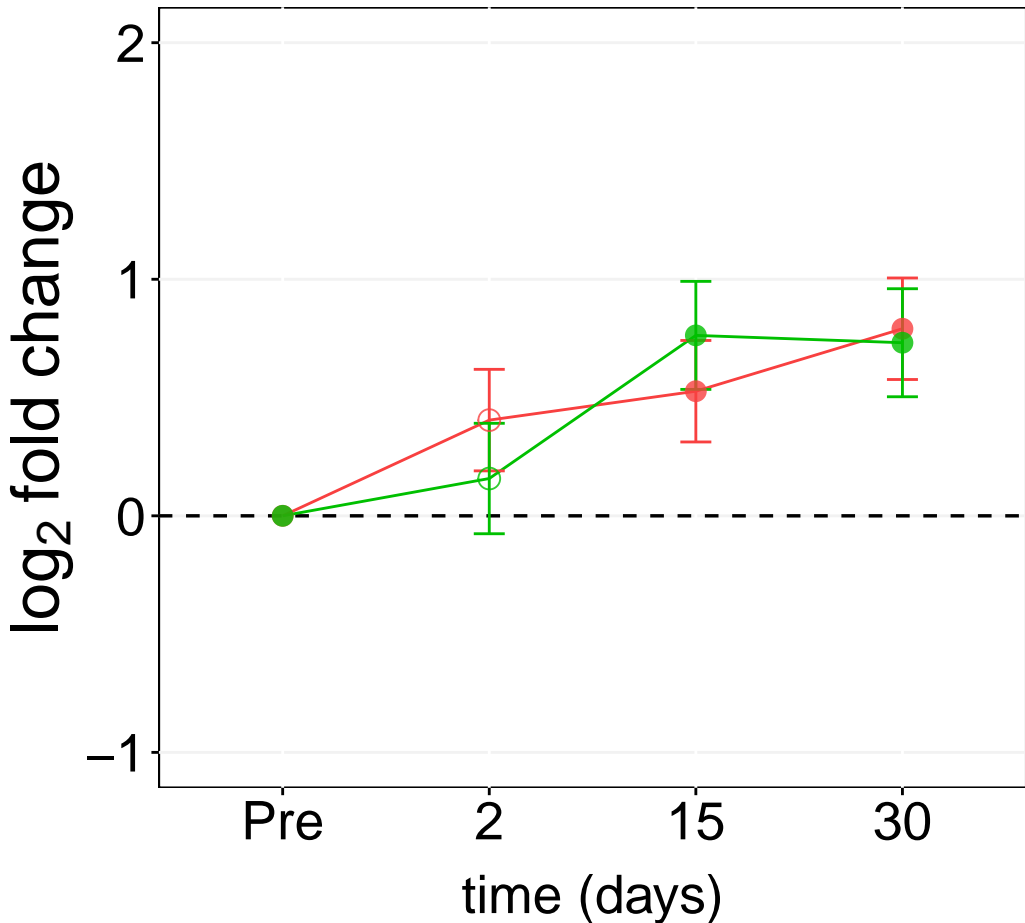

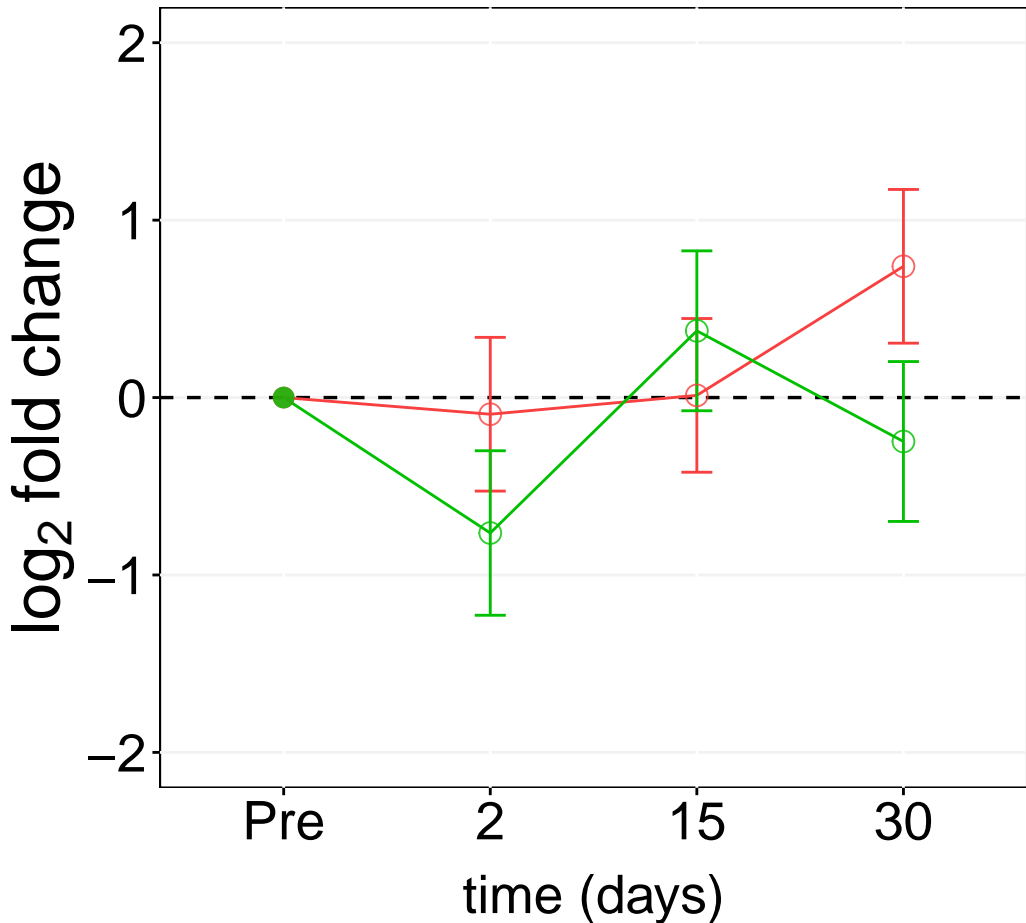



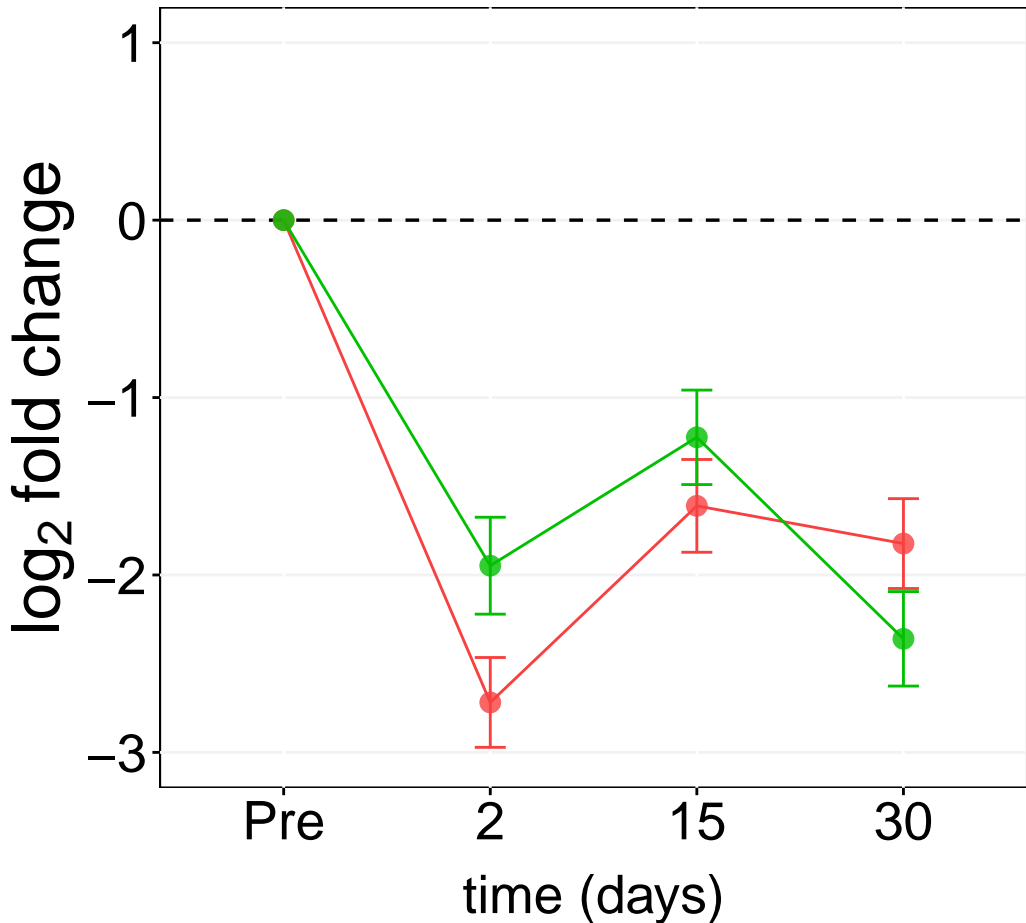

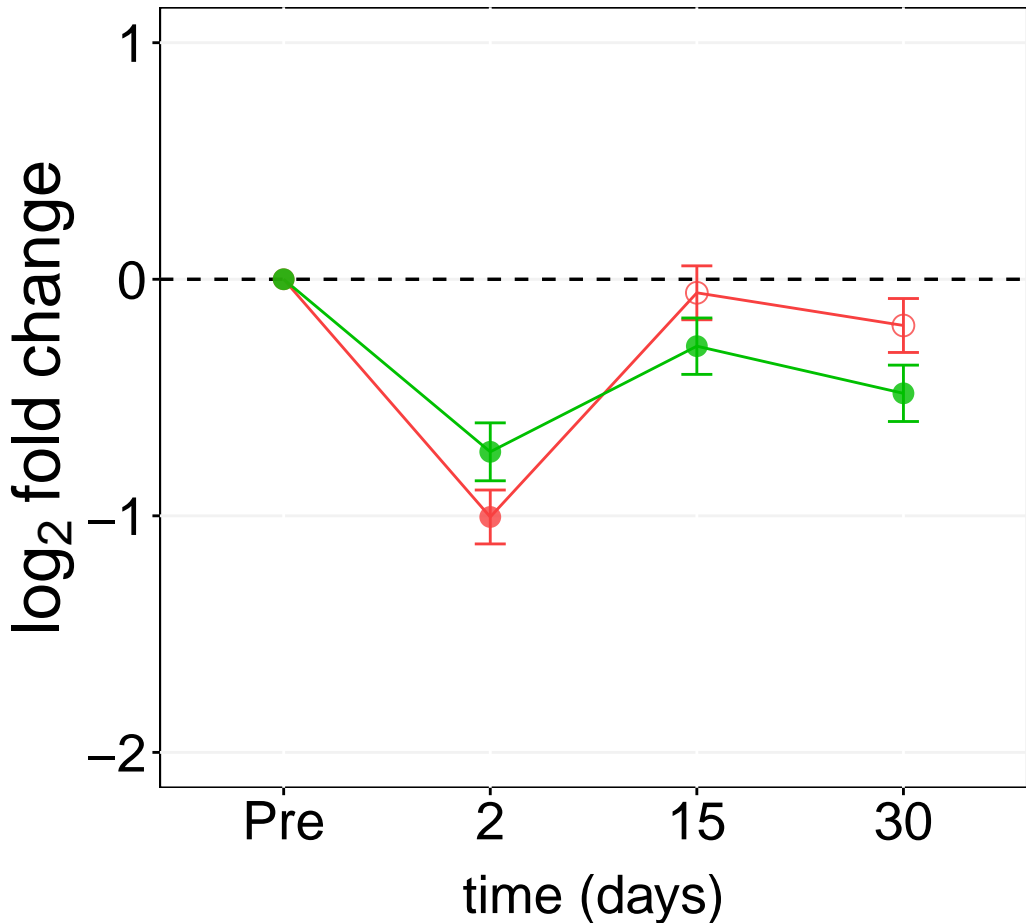

$\log_2$  fold change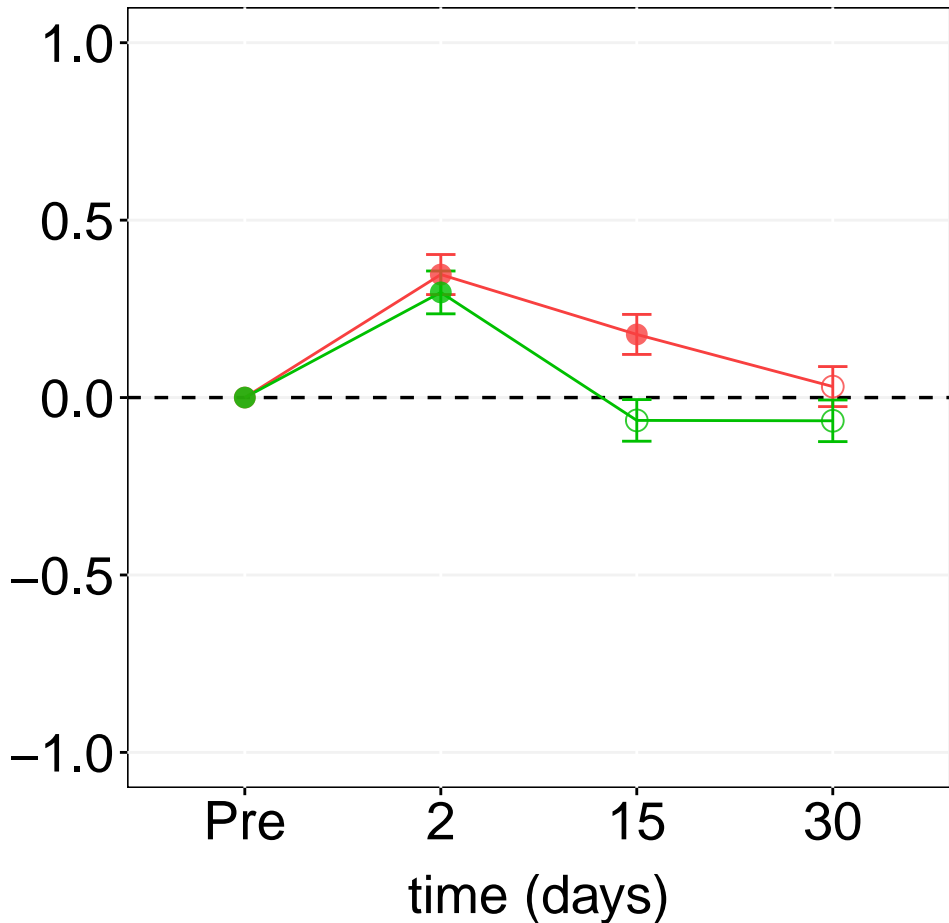

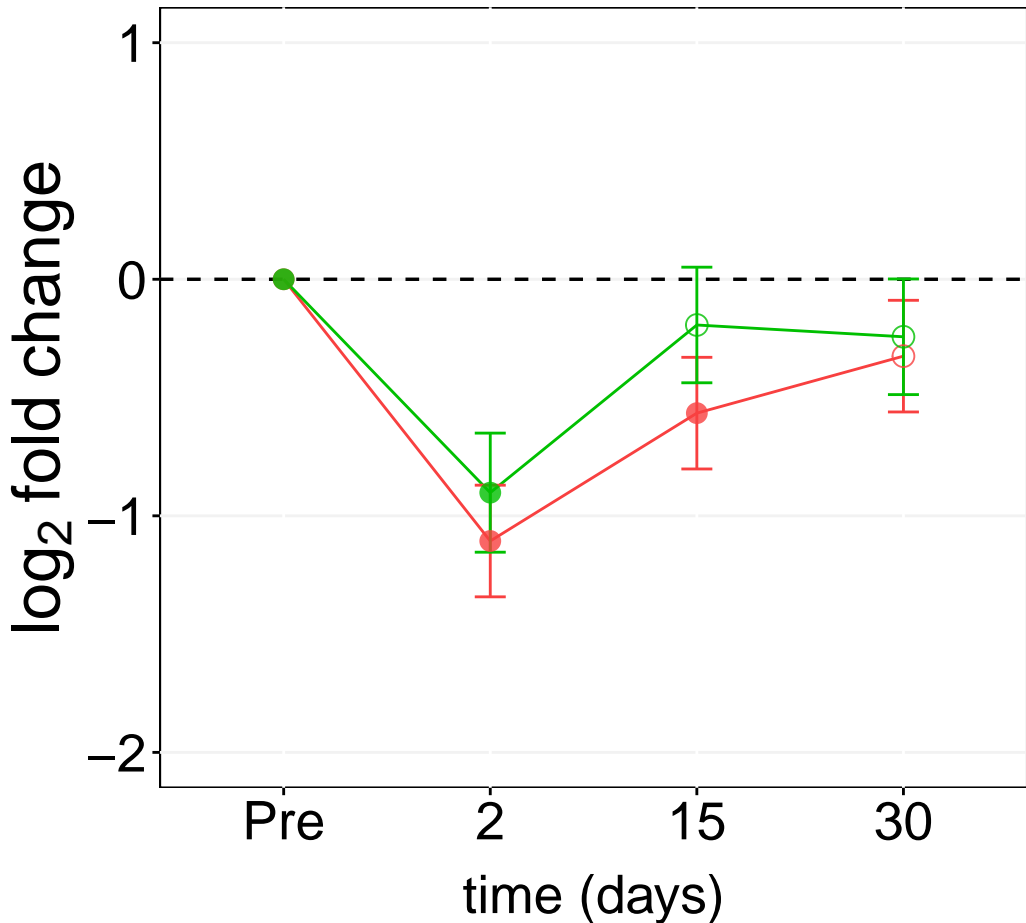

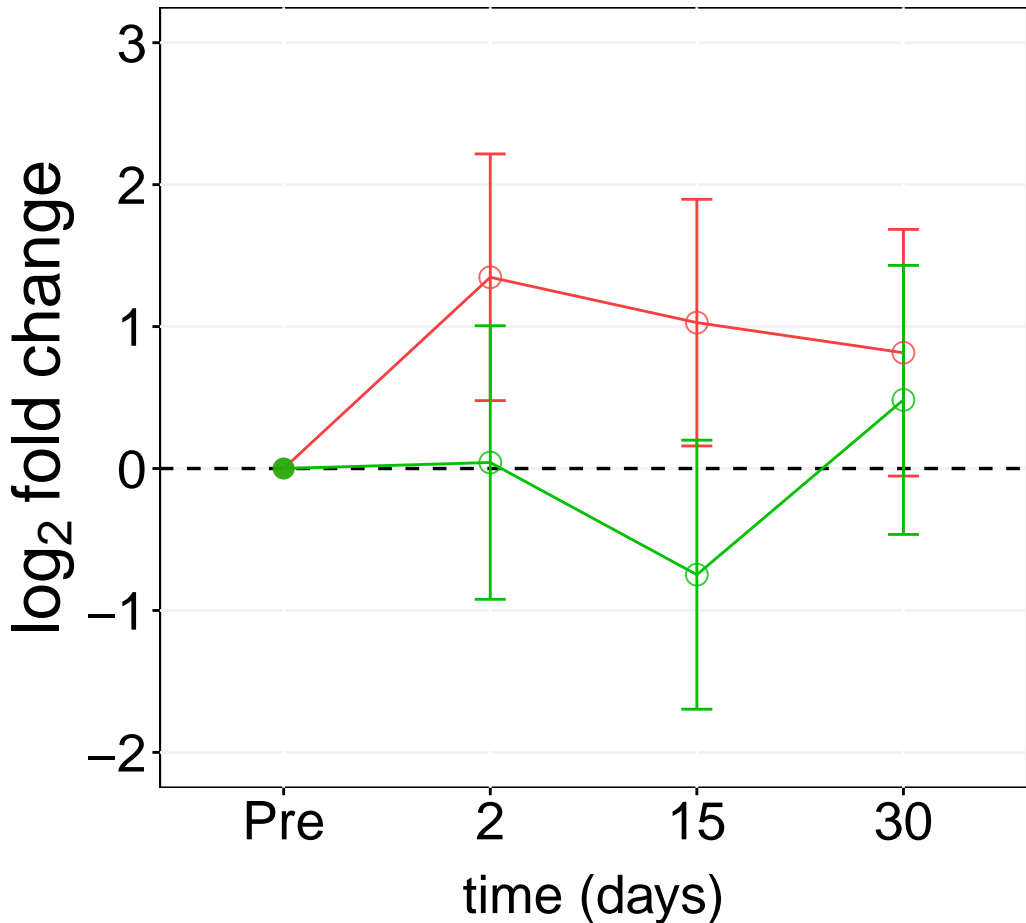

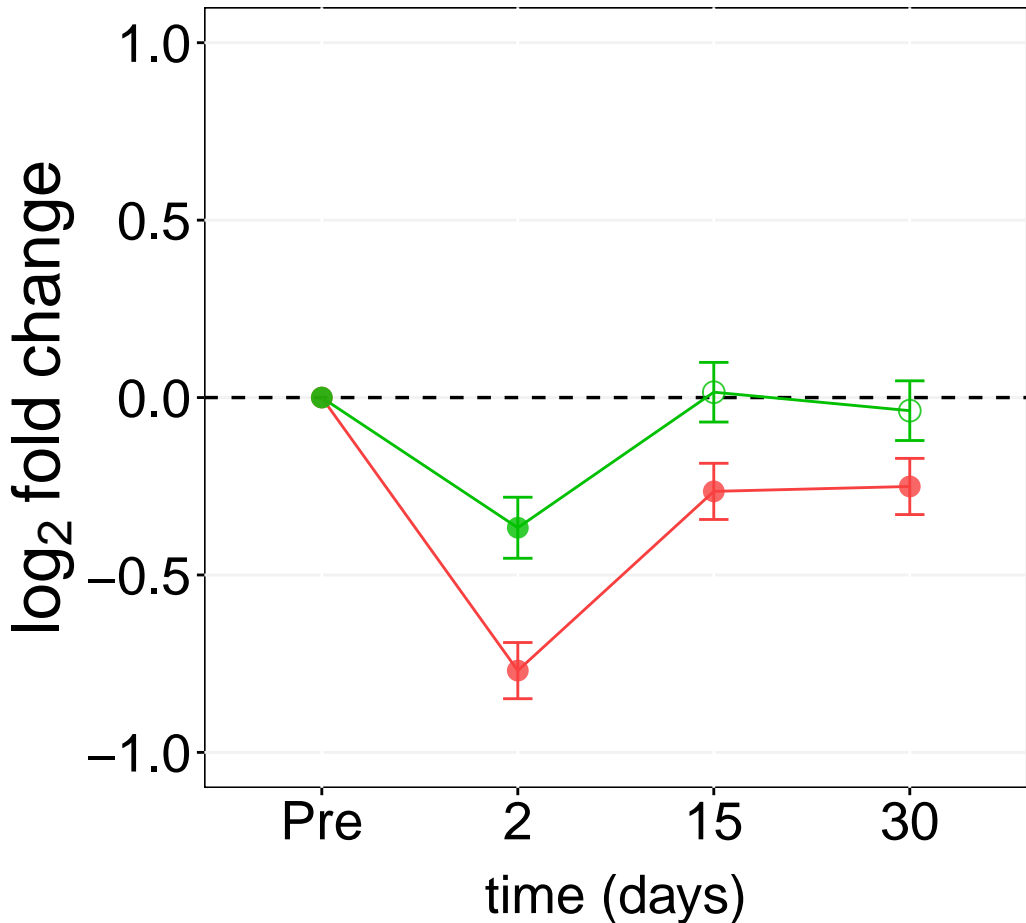

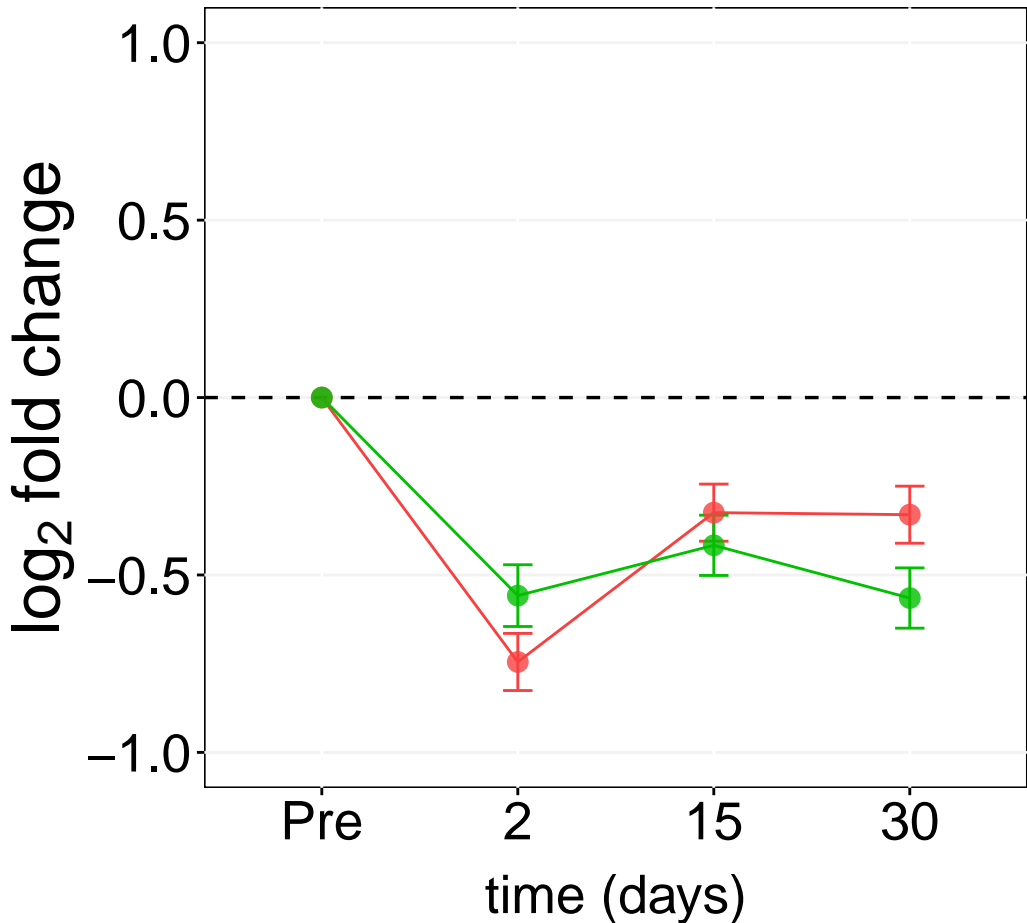

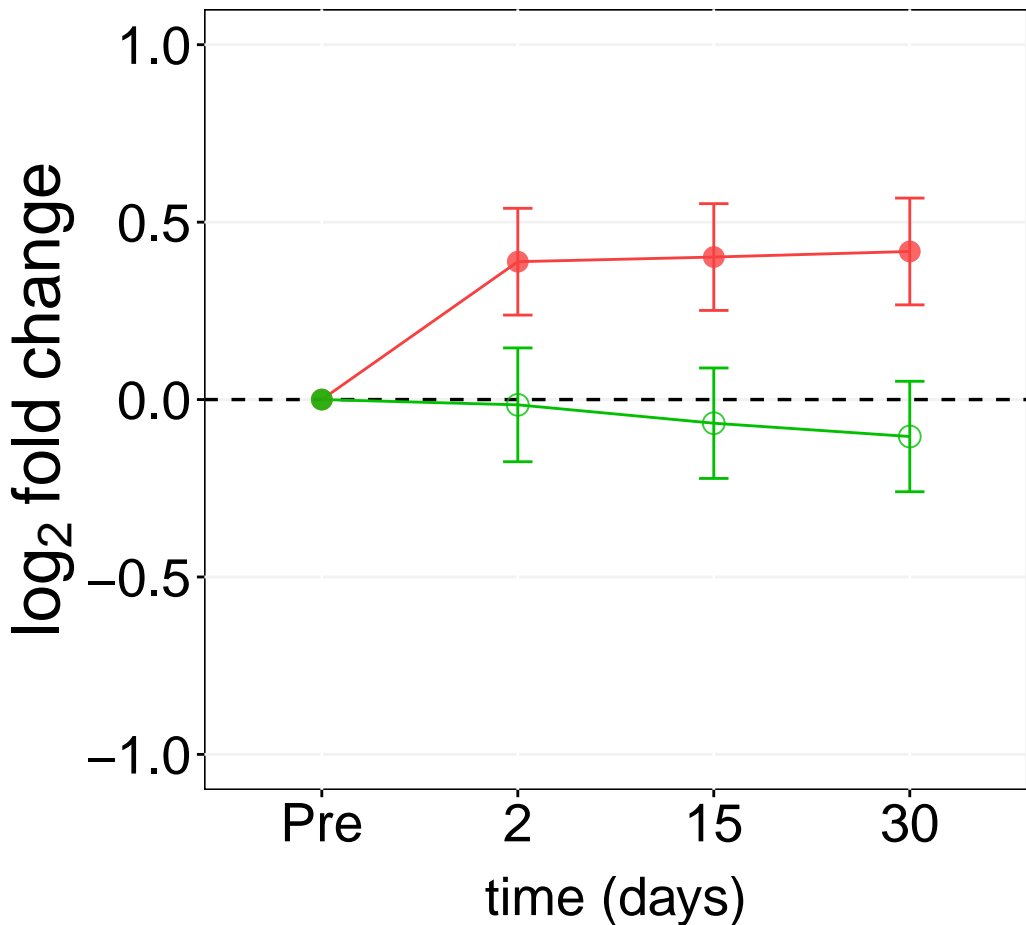



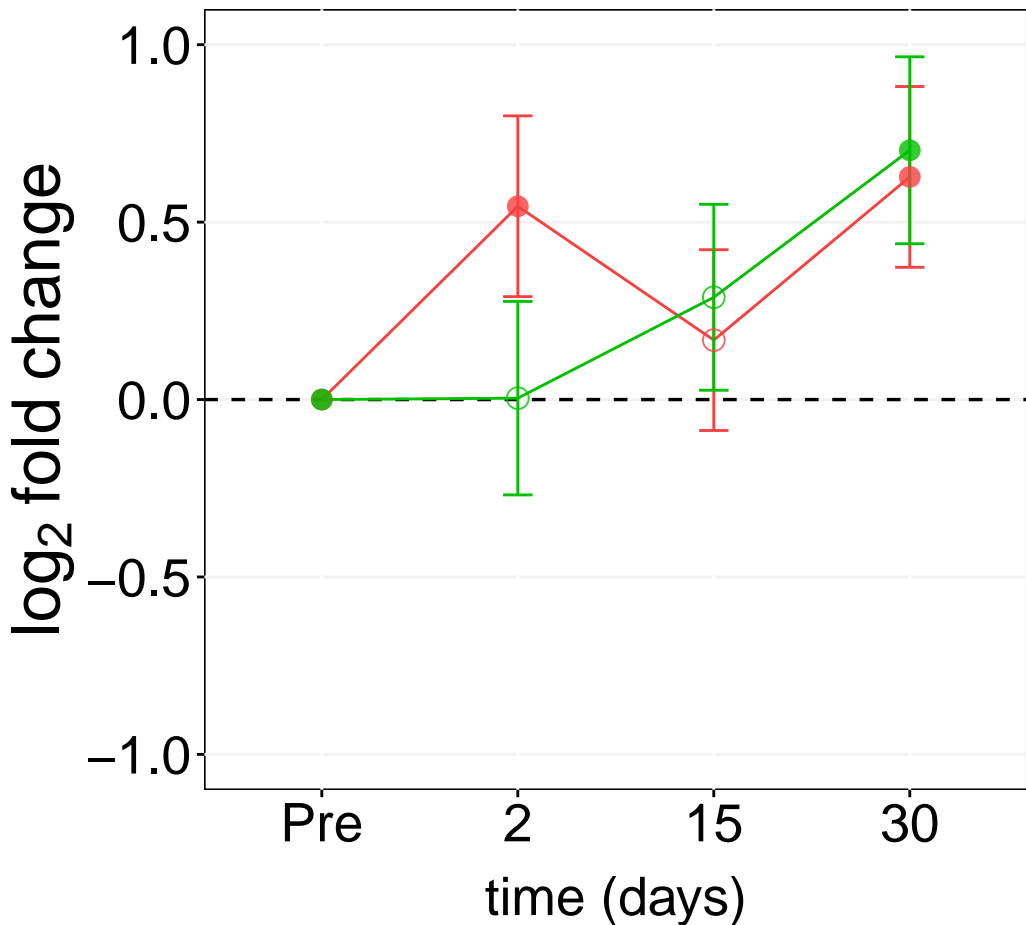

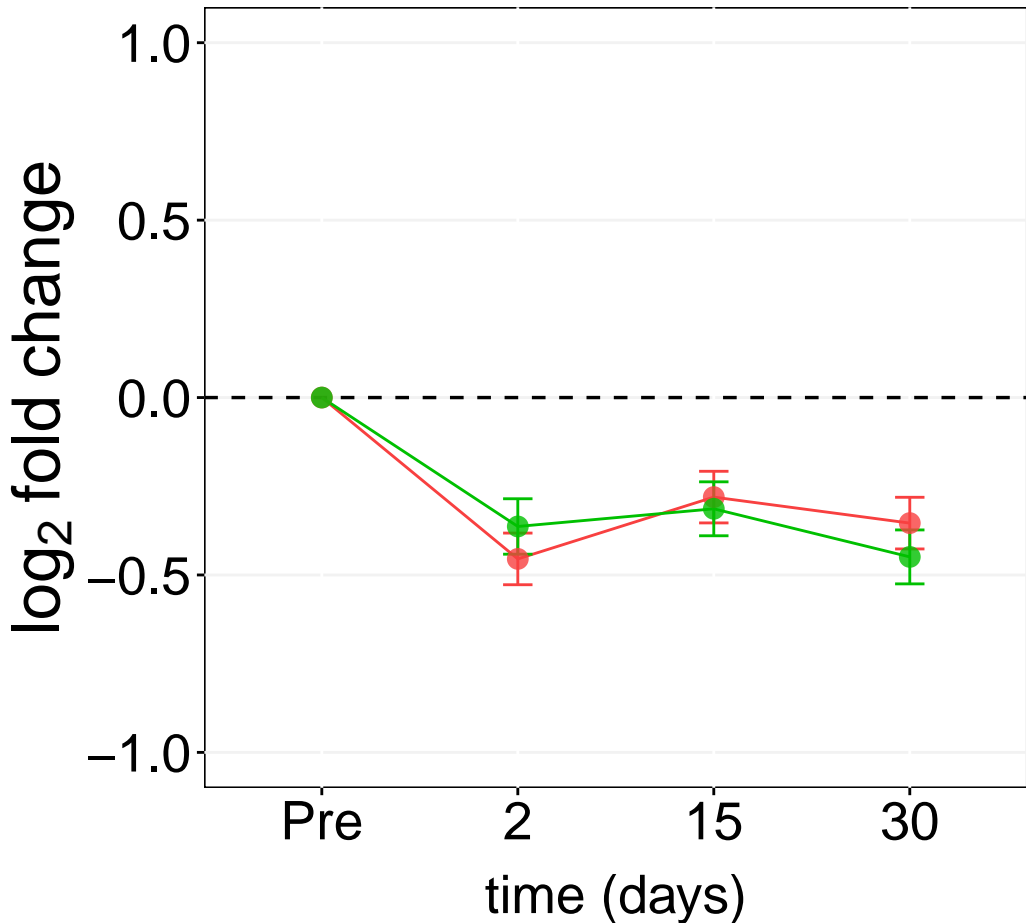

$\log_2$  fold change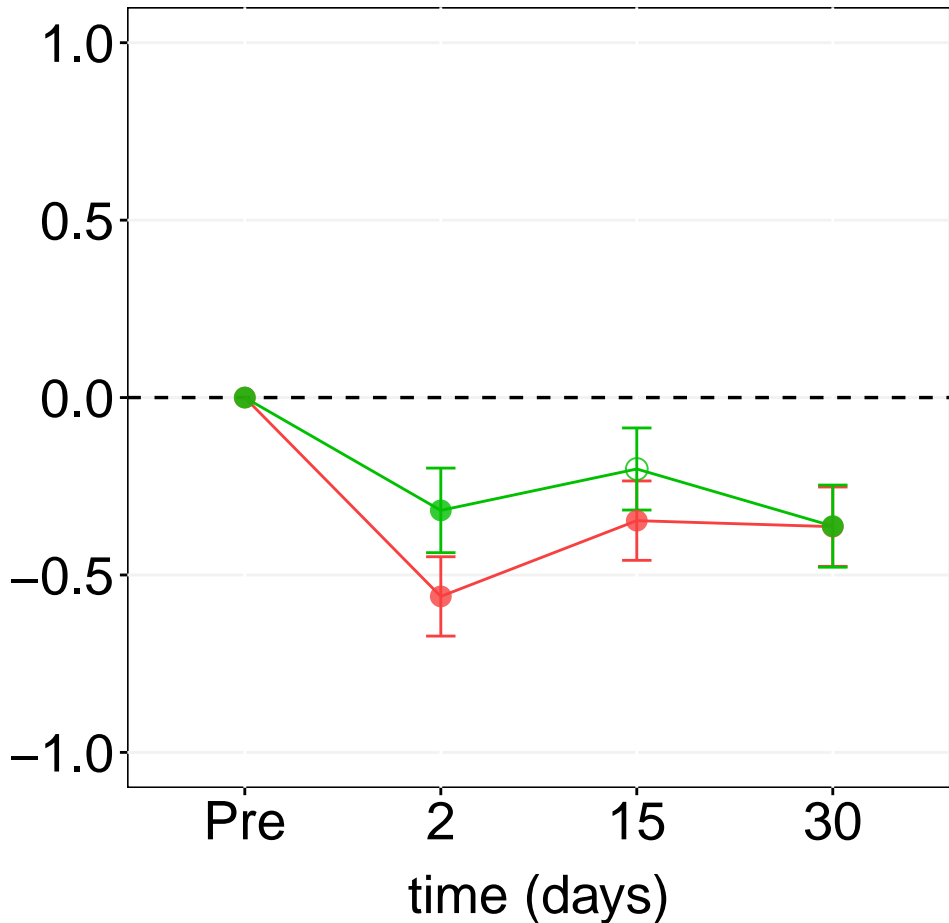

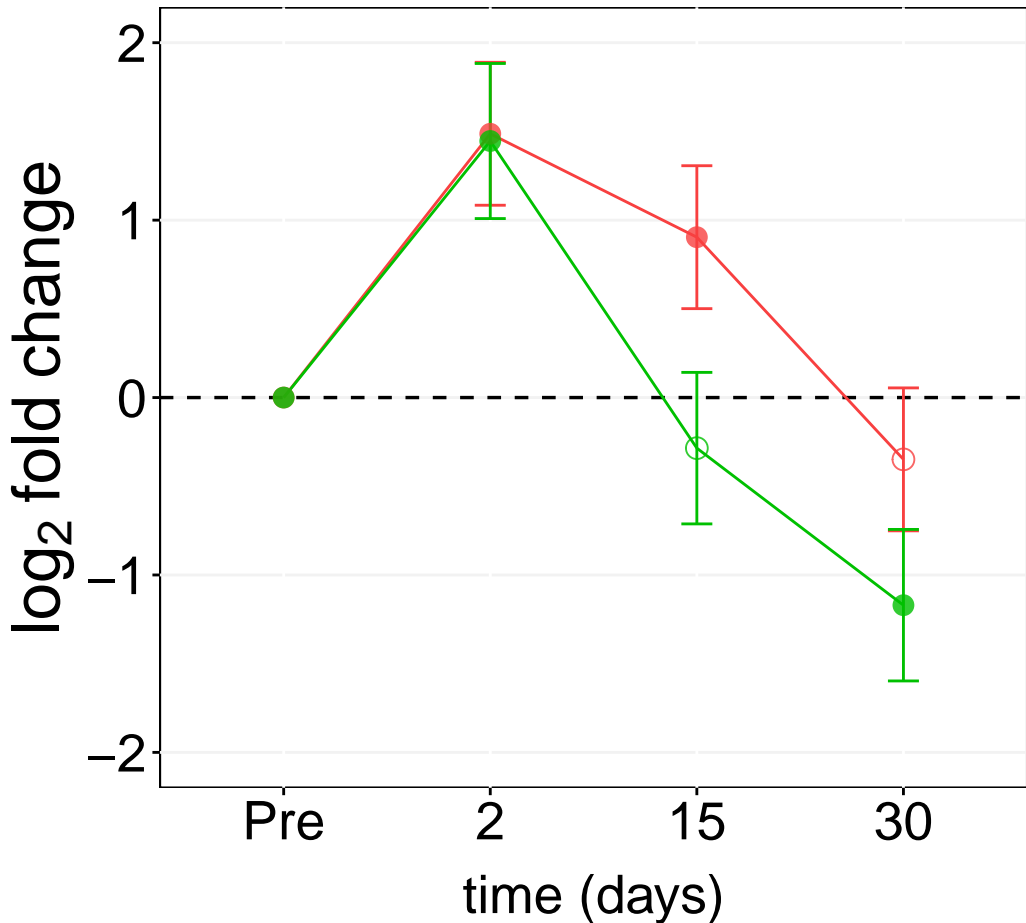

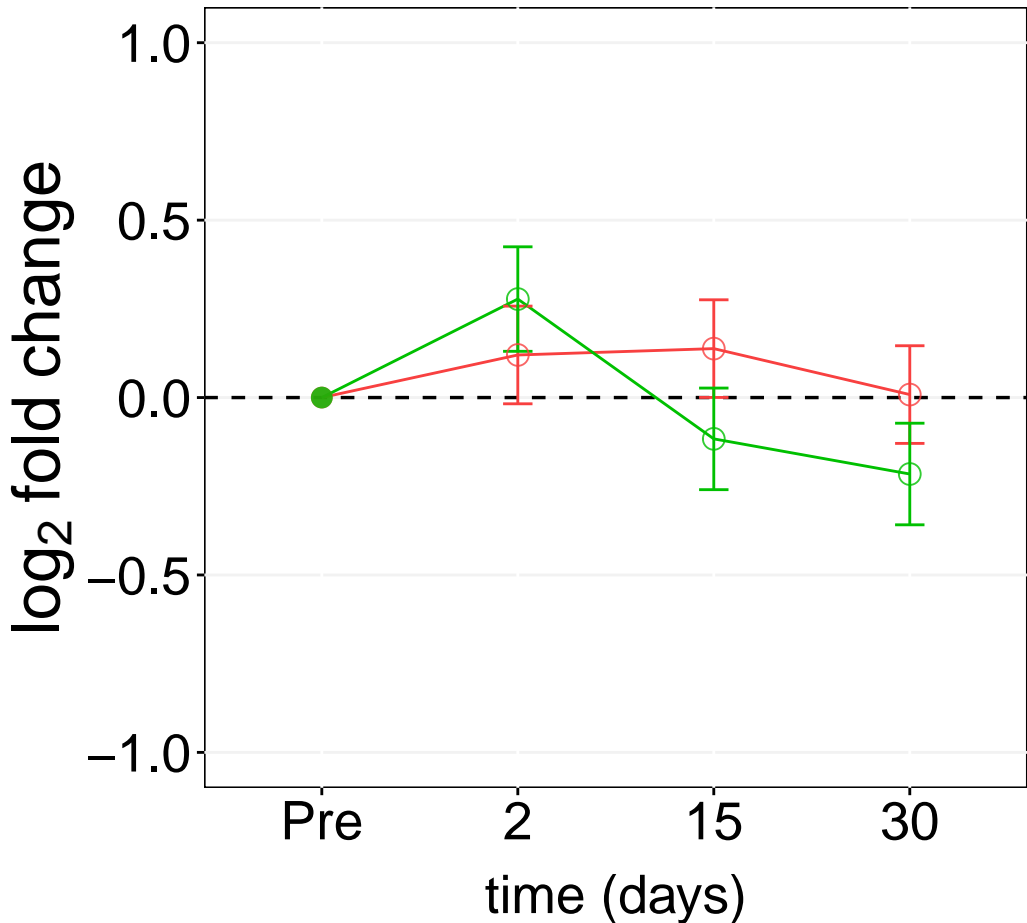

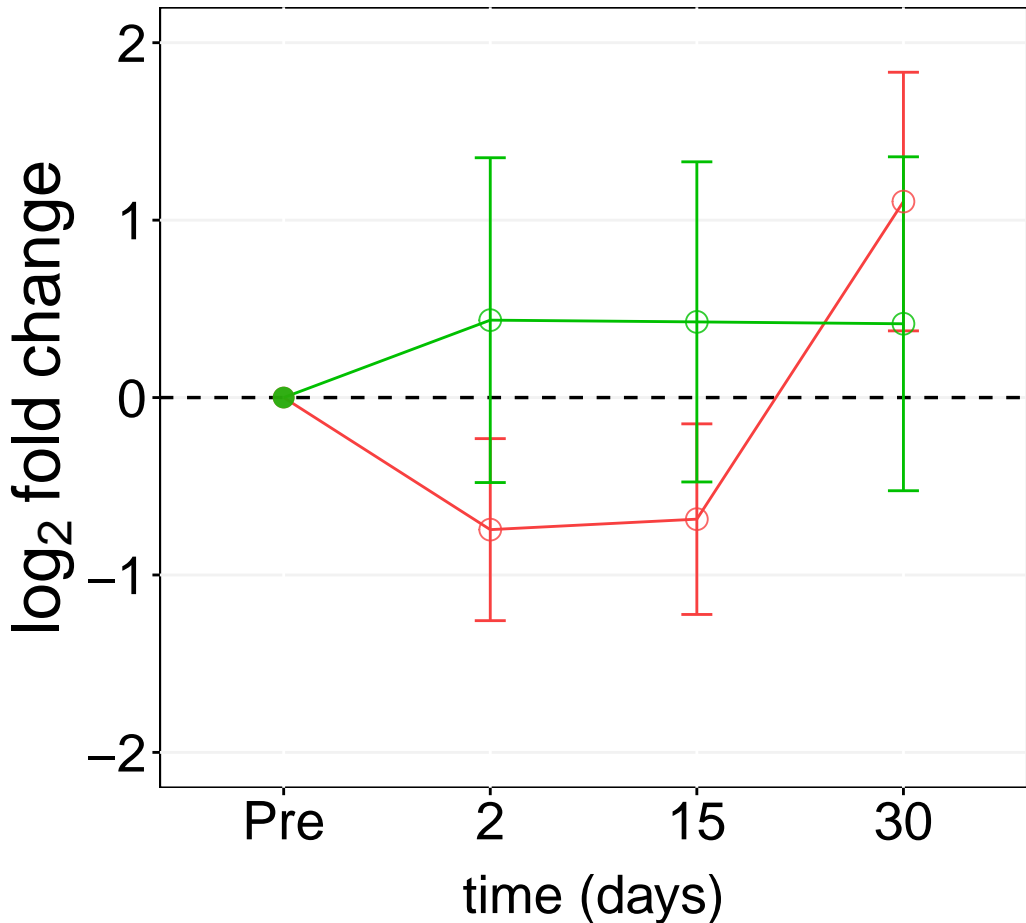

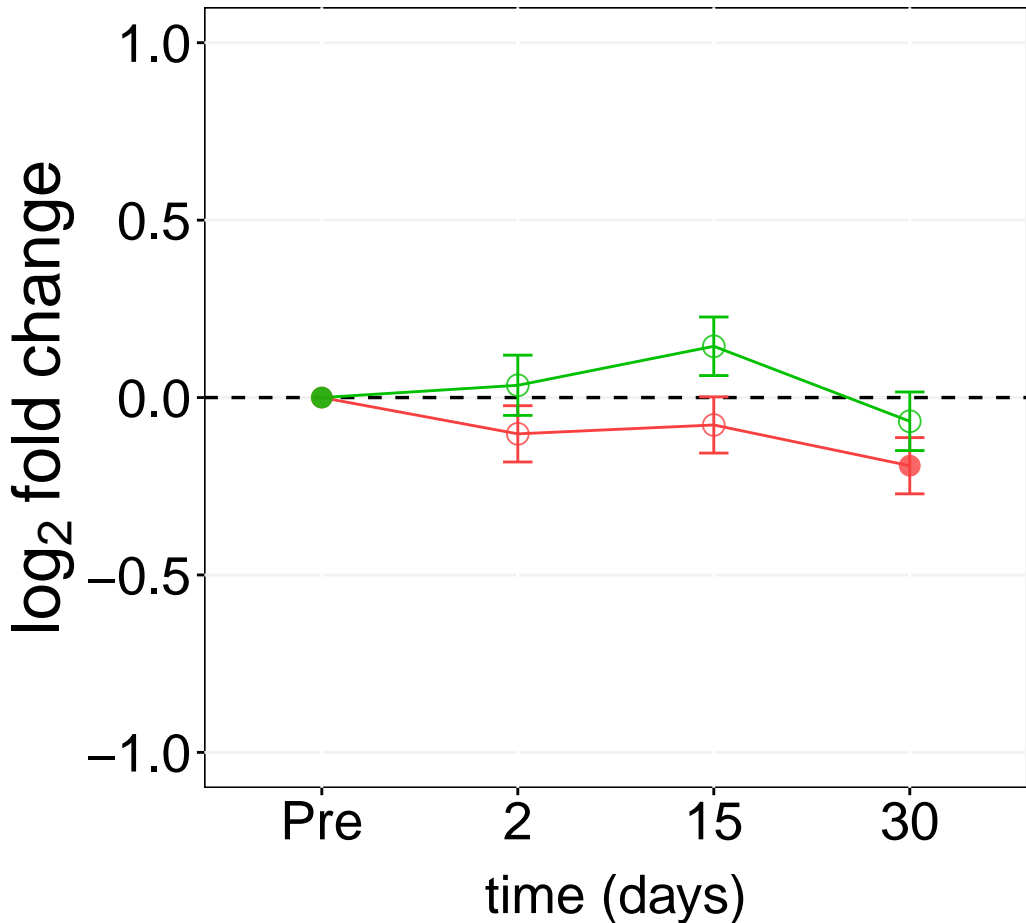

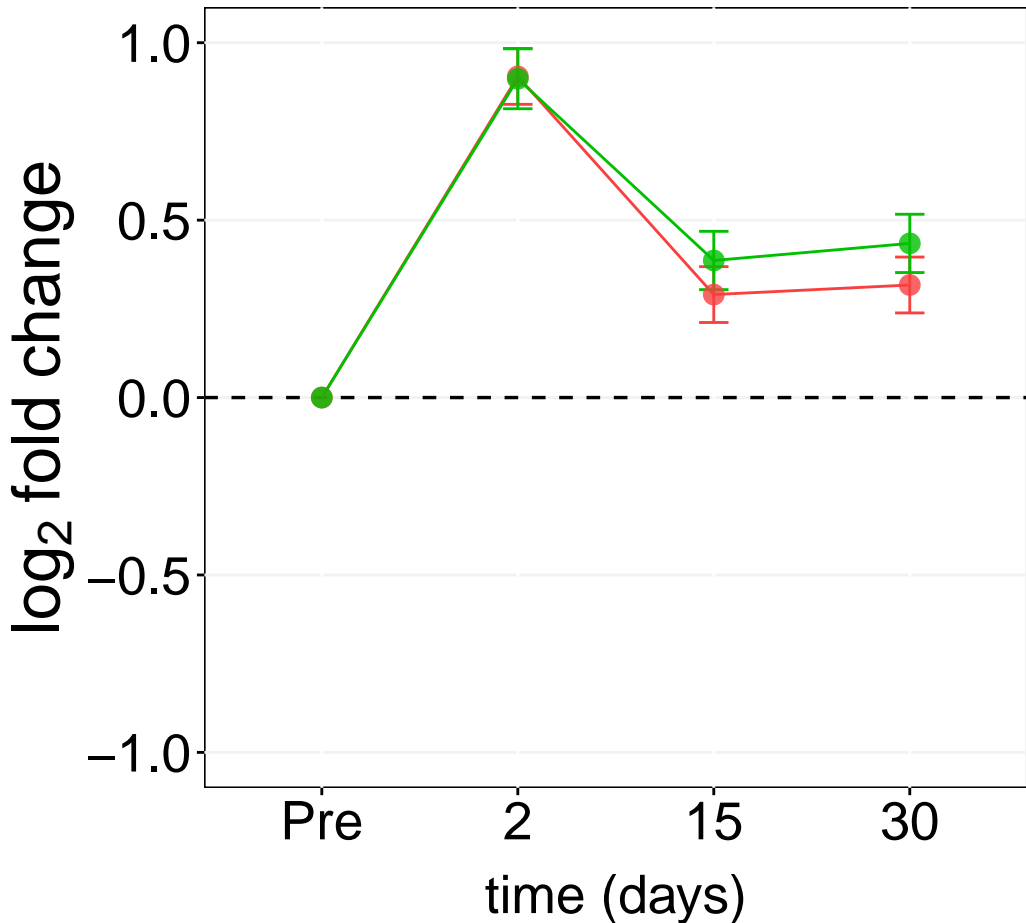



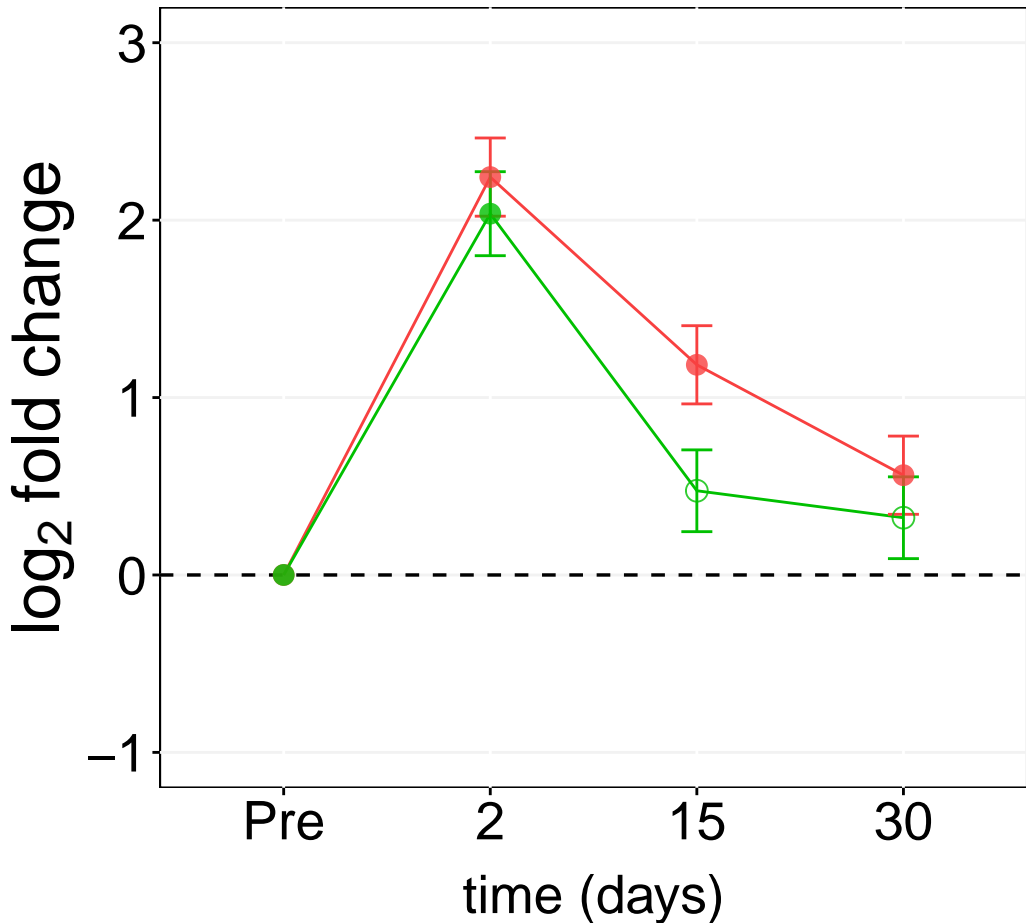

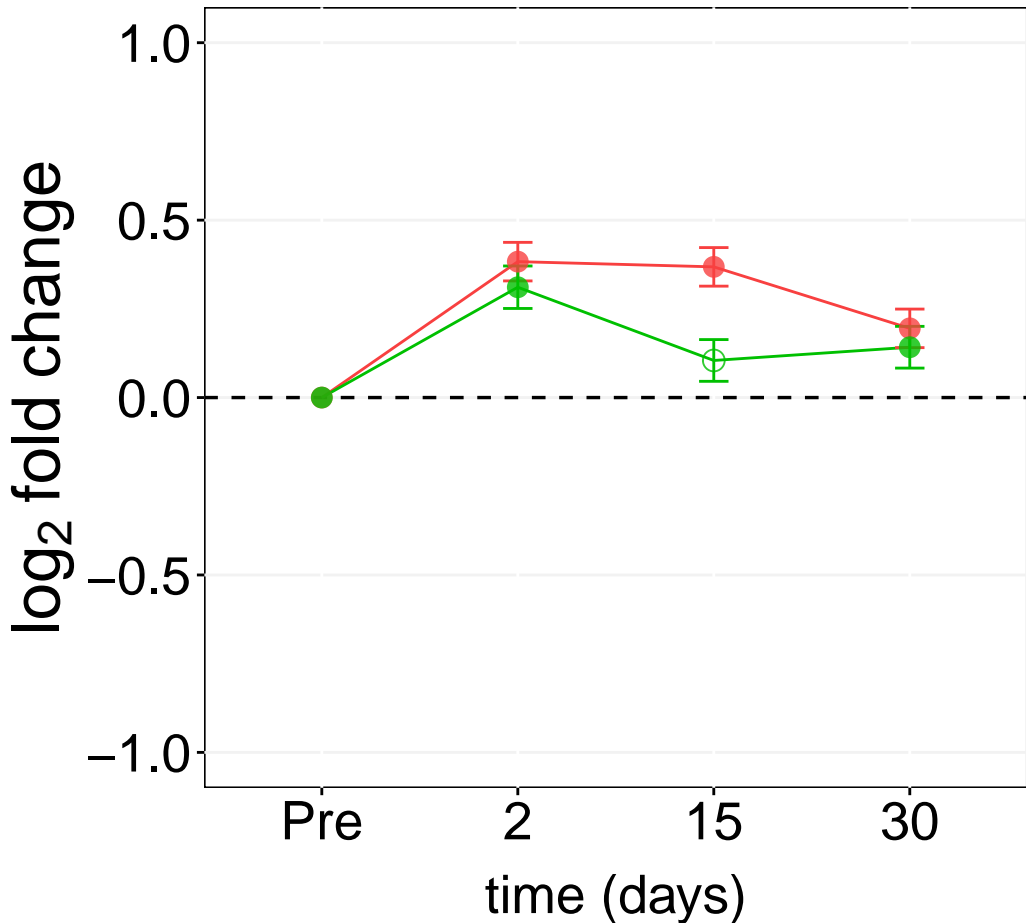

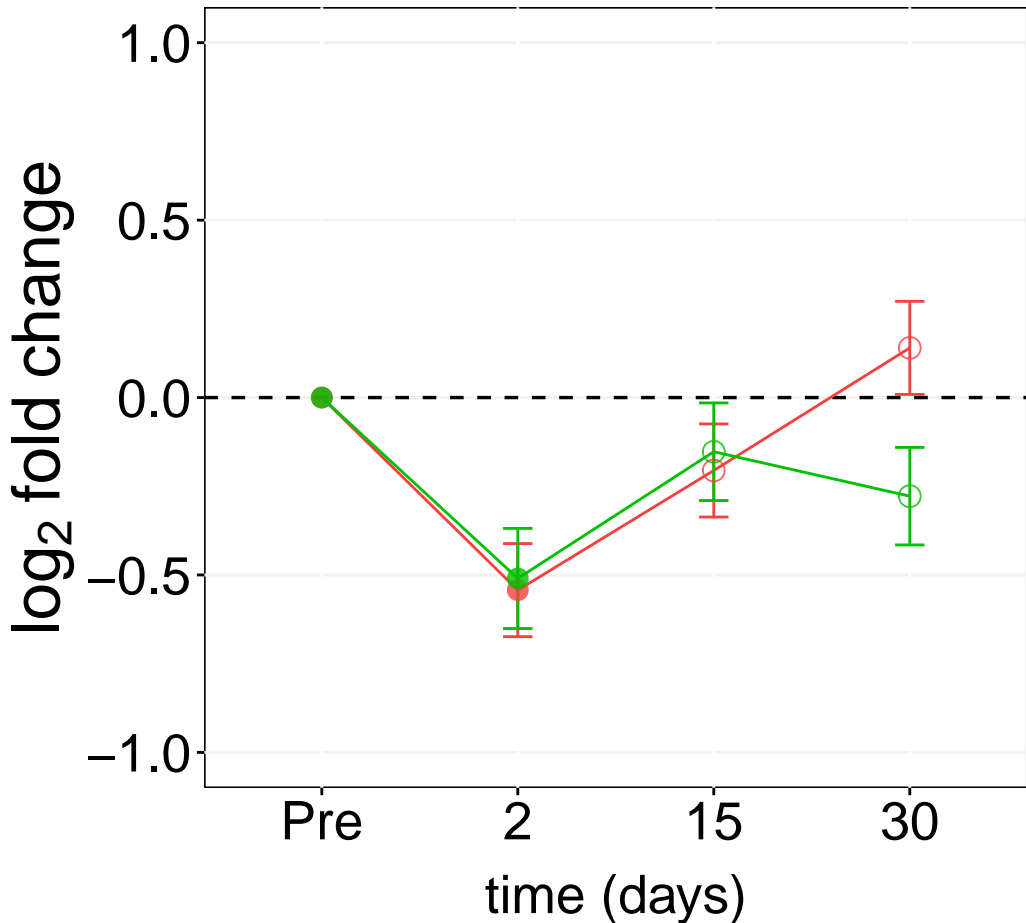

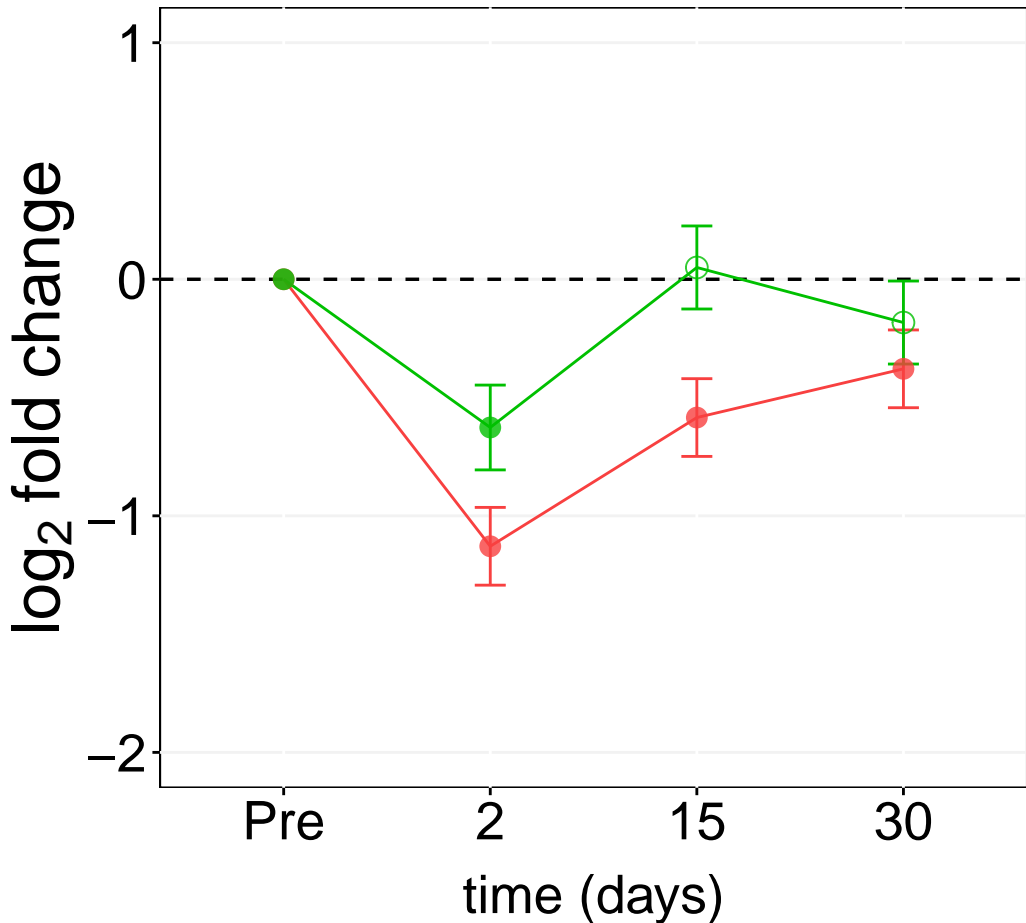

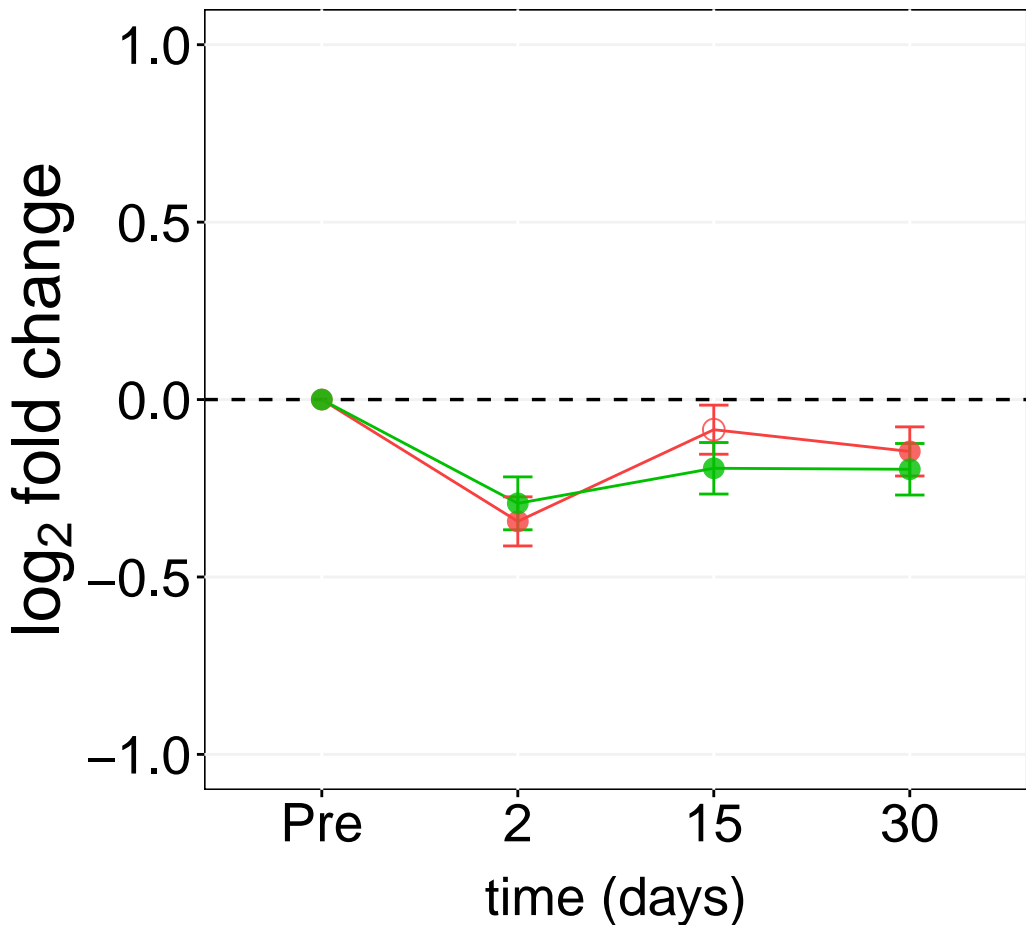

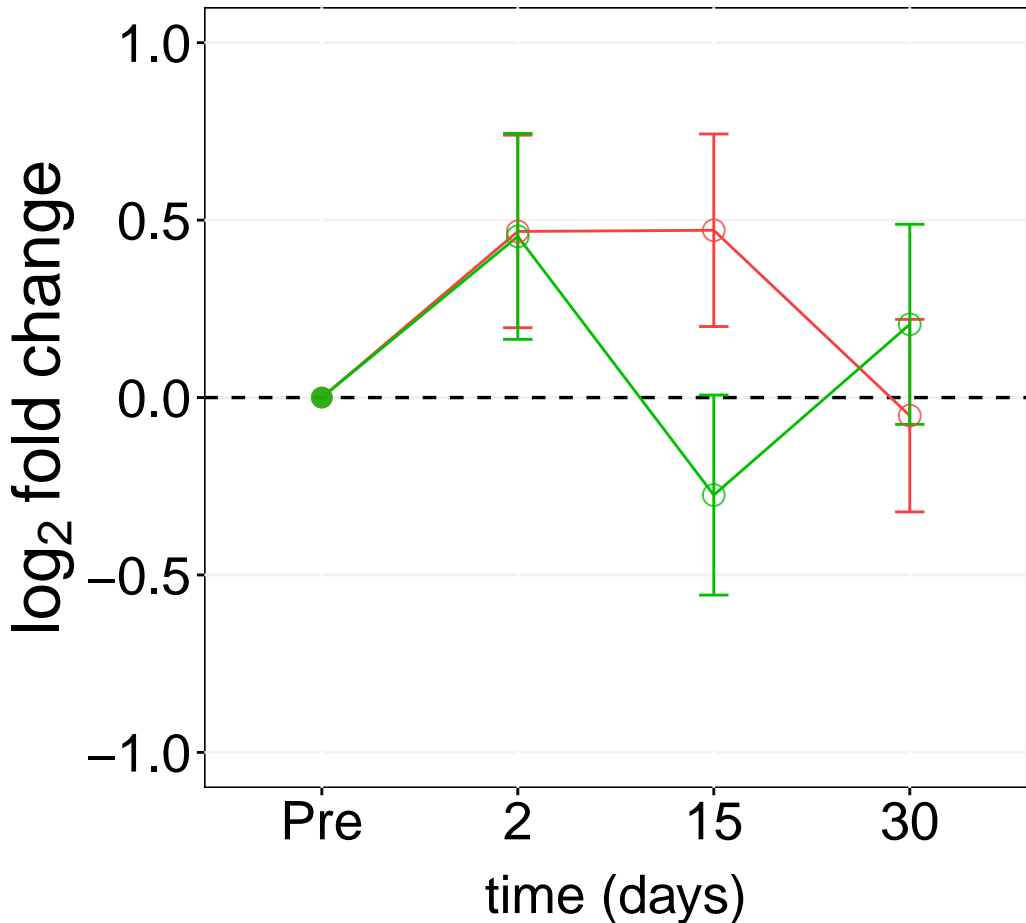

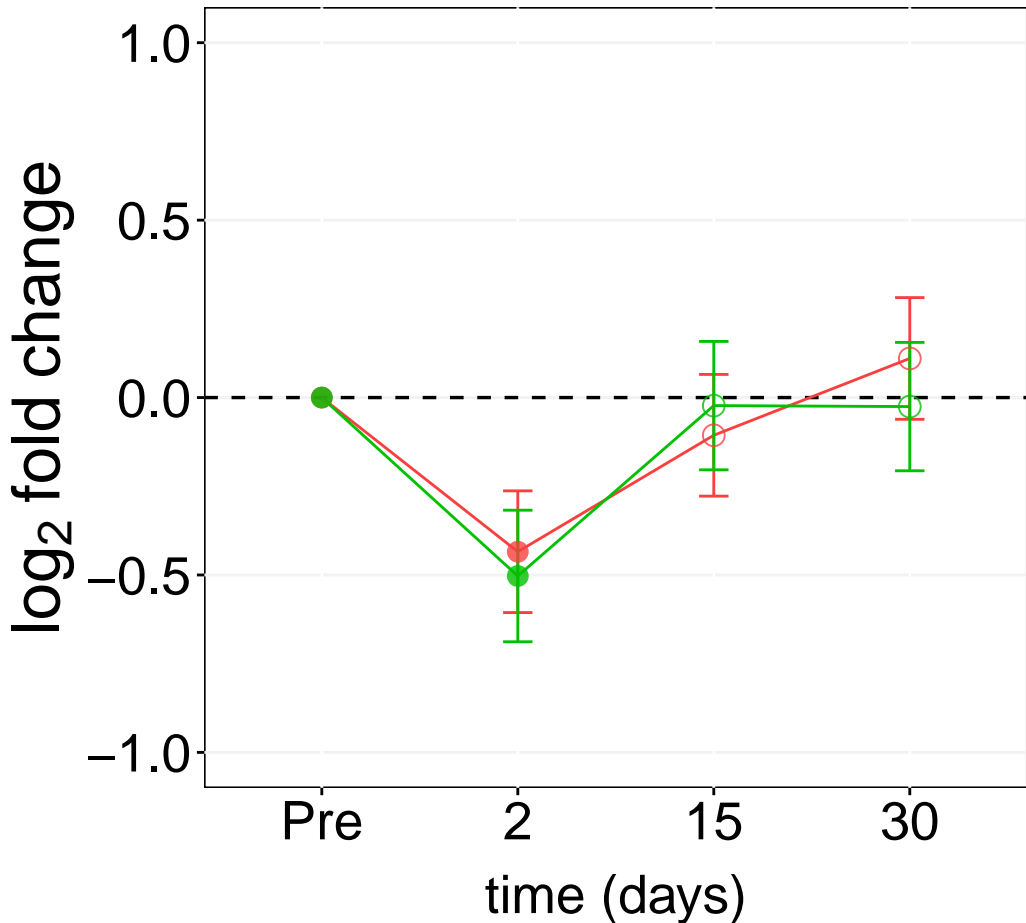

$\log_2$  fold change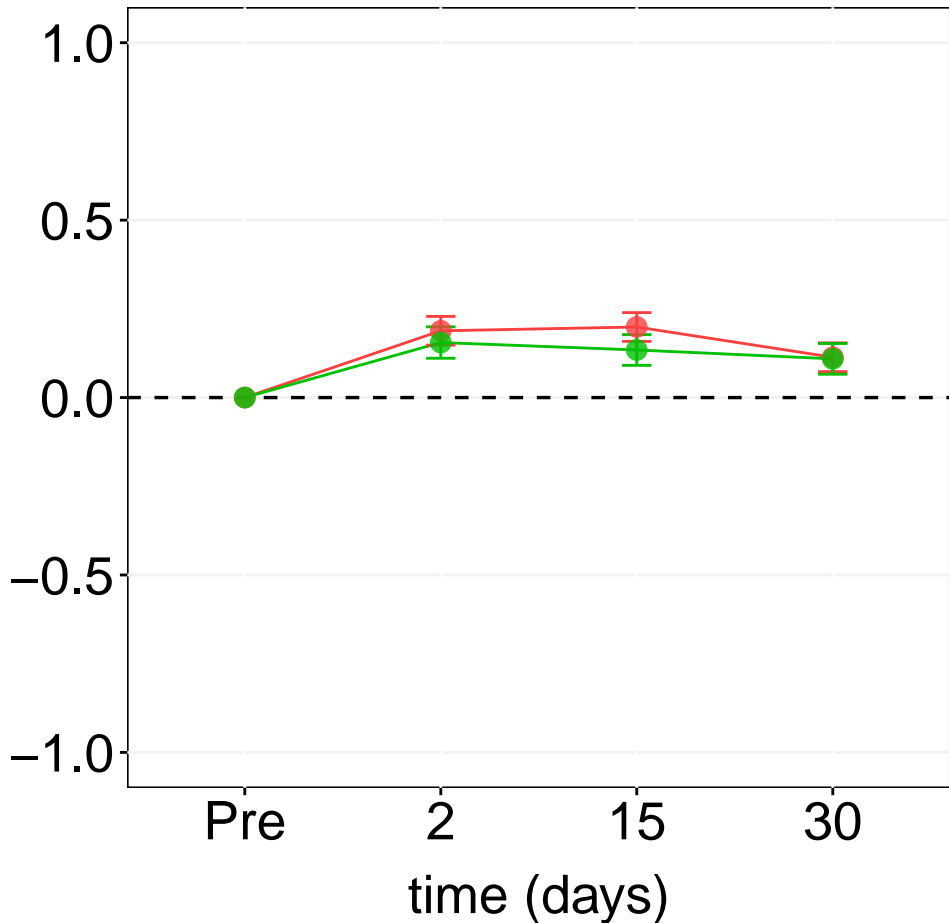



$\log_2$  fold change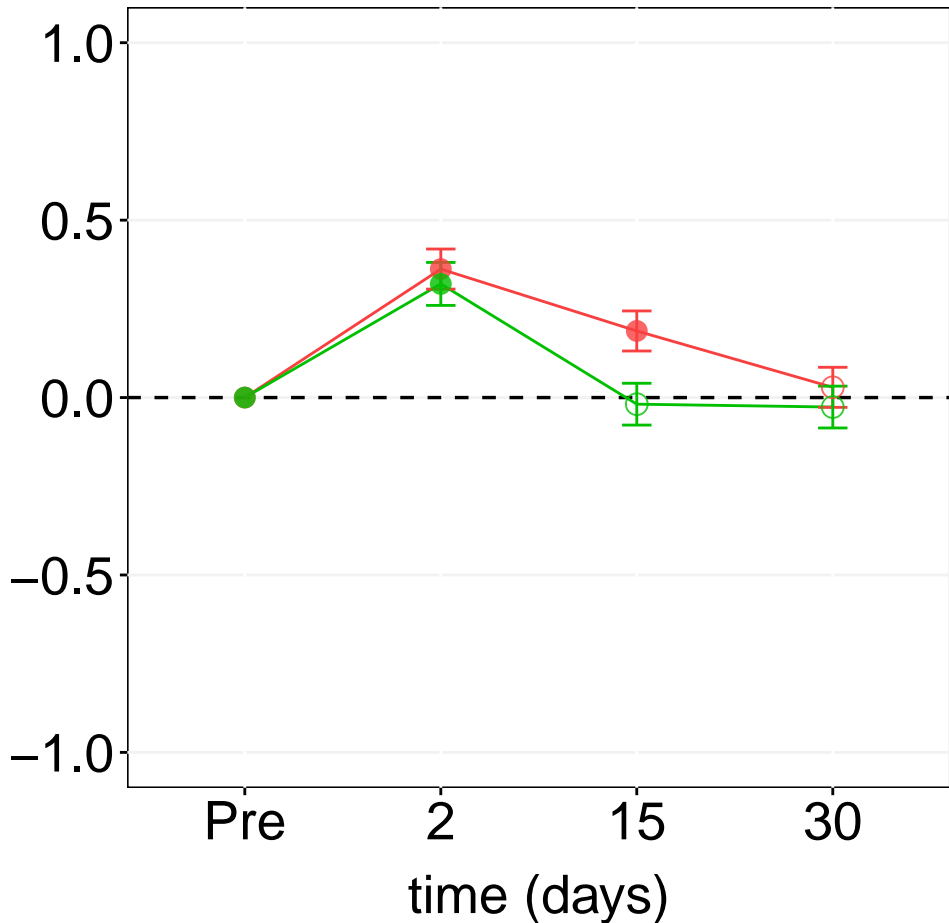

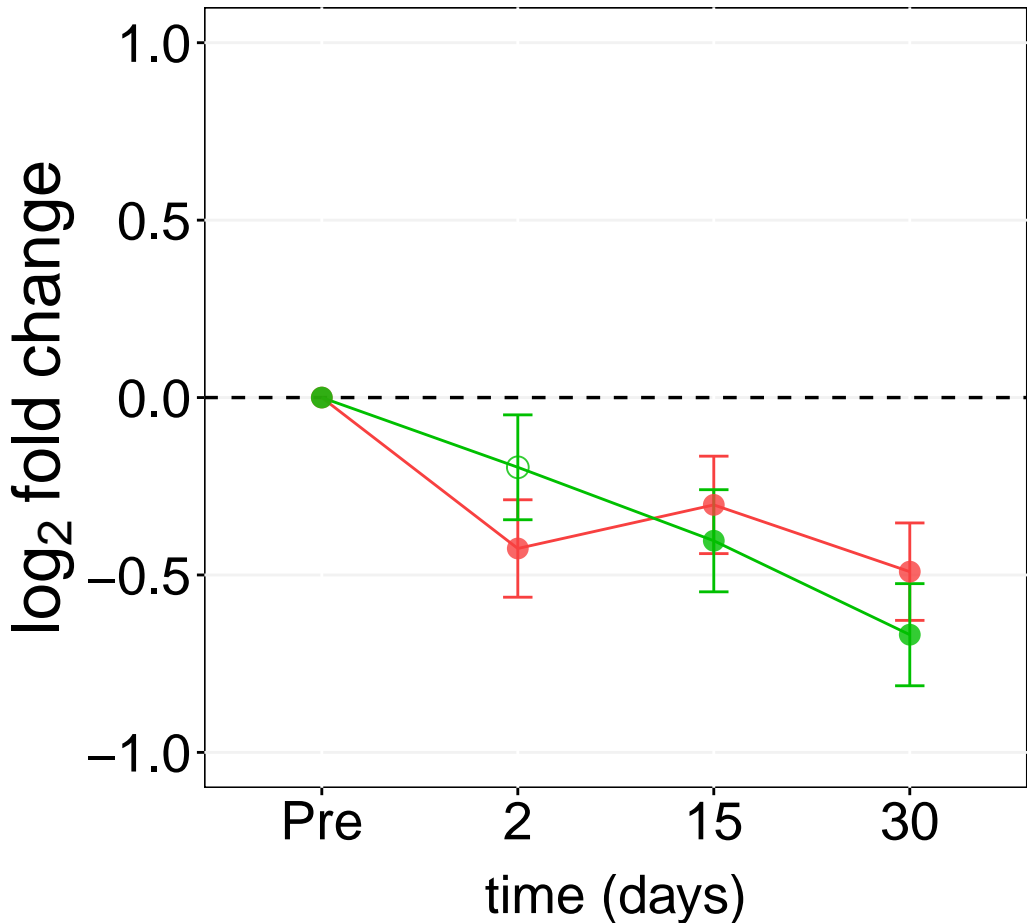

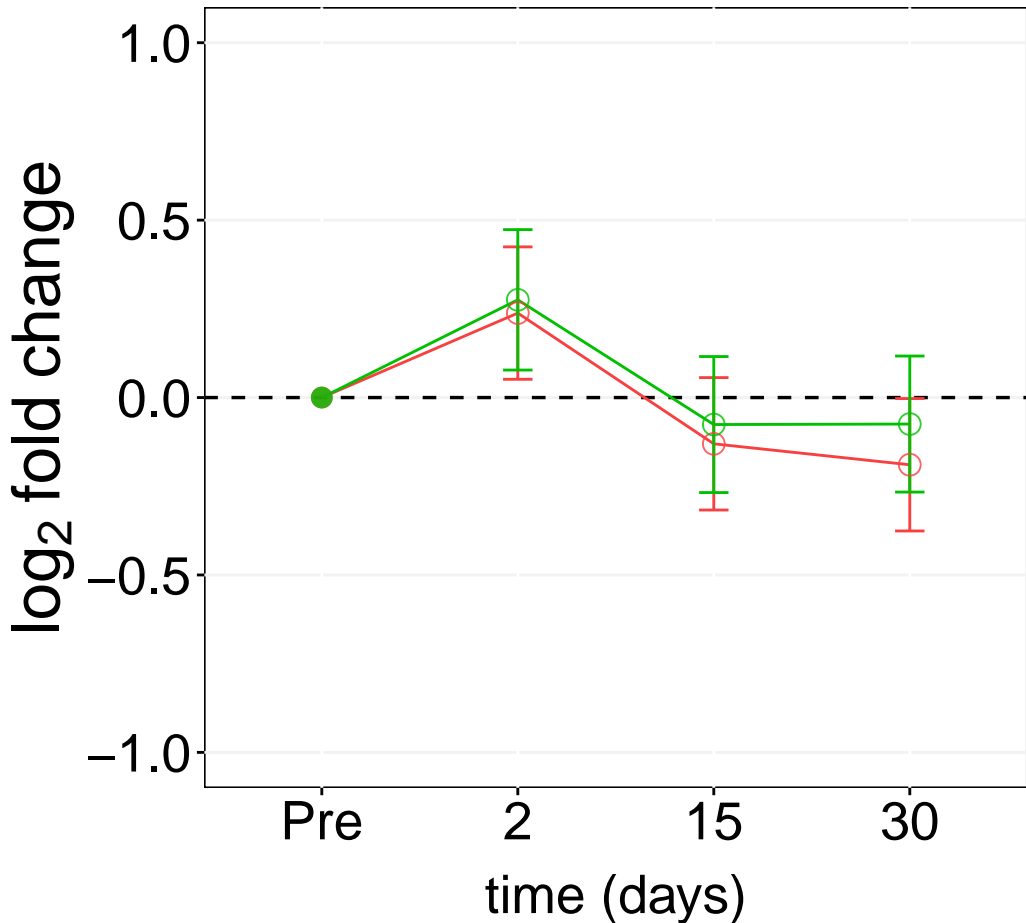

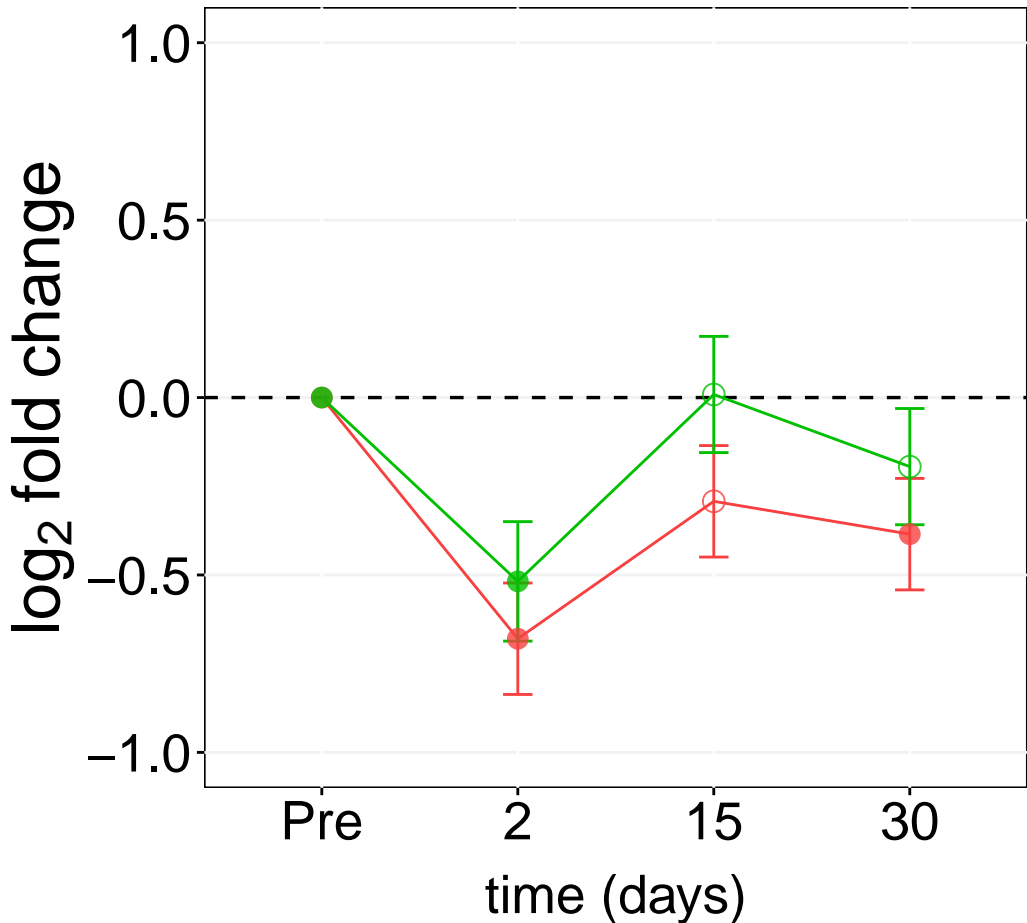

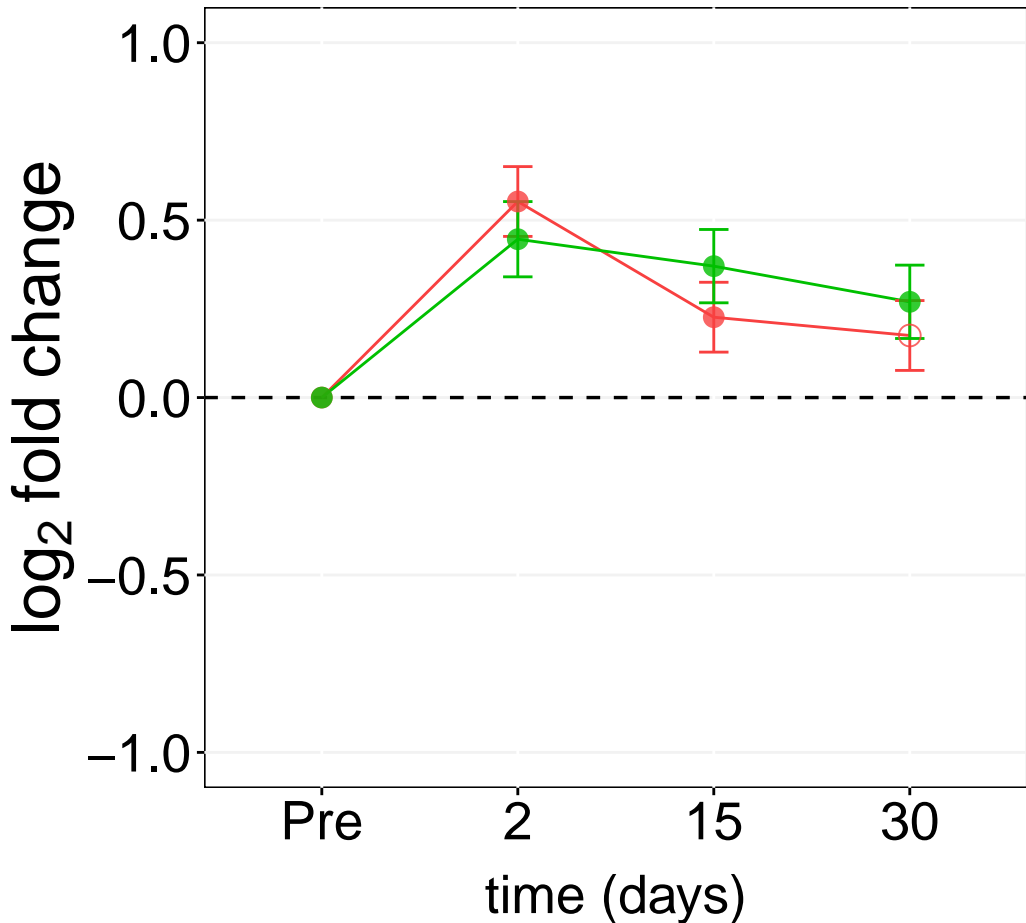

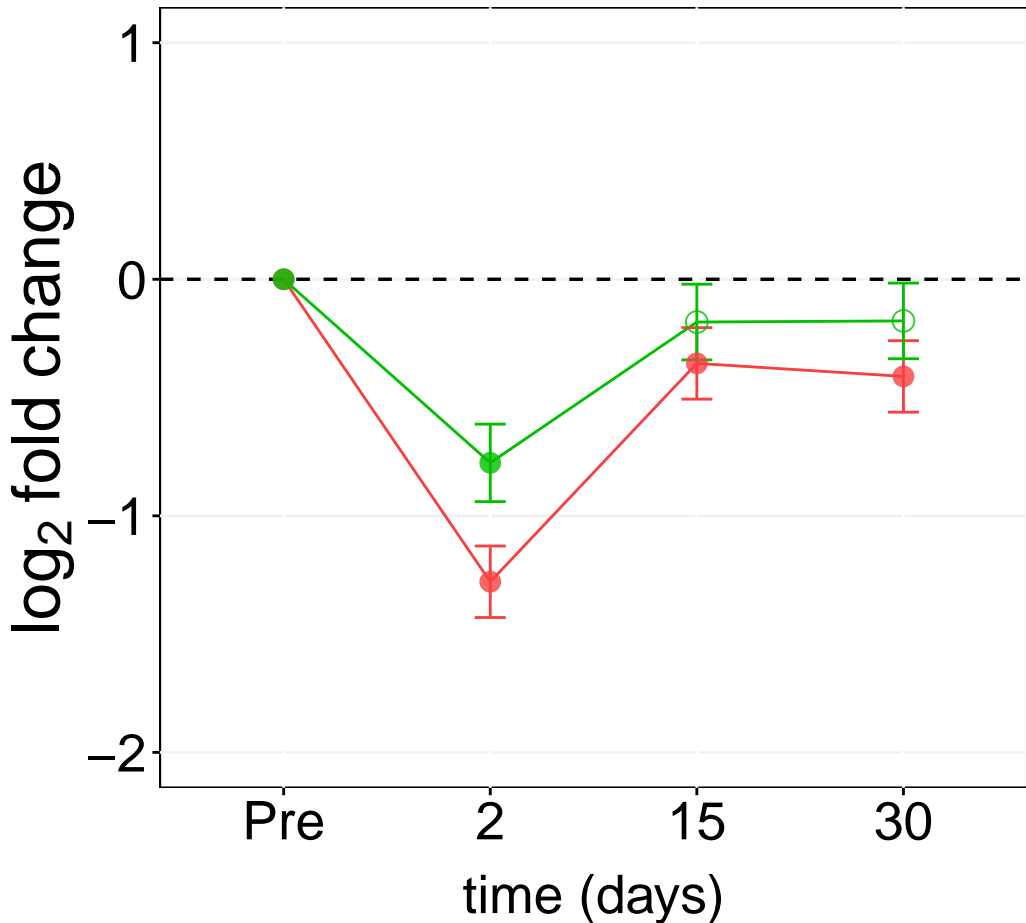

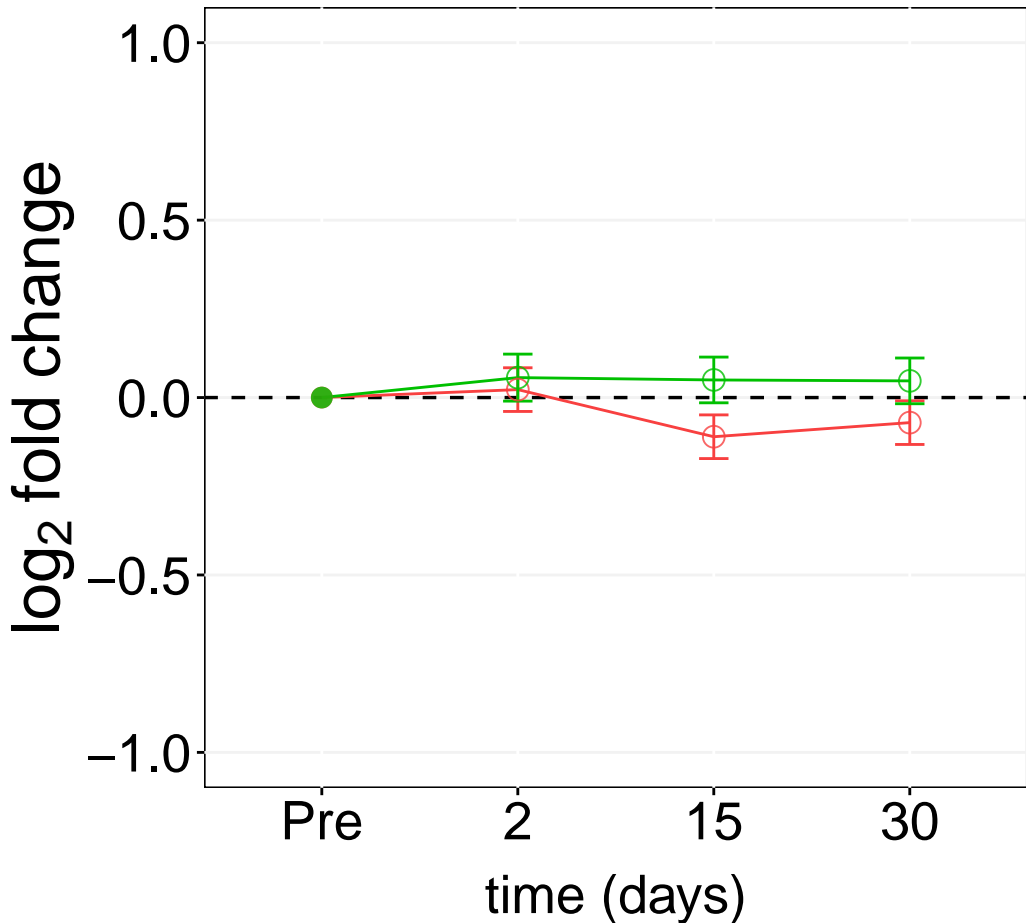

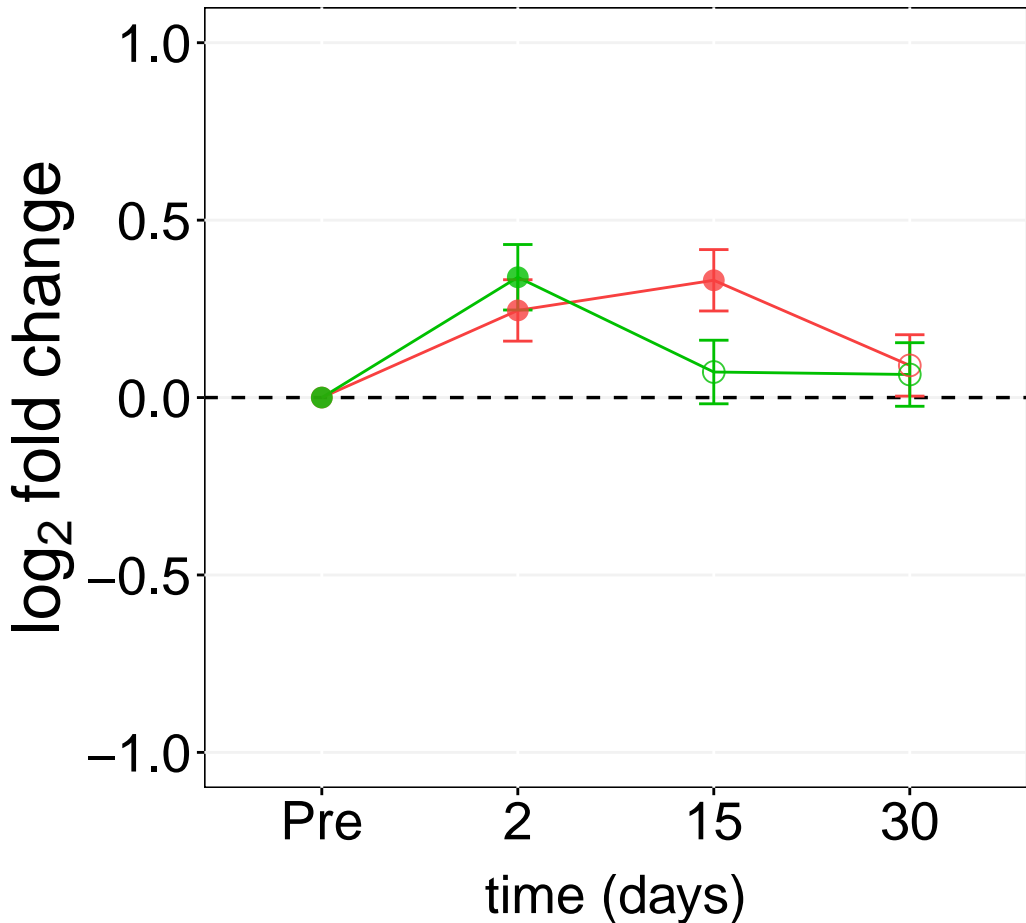



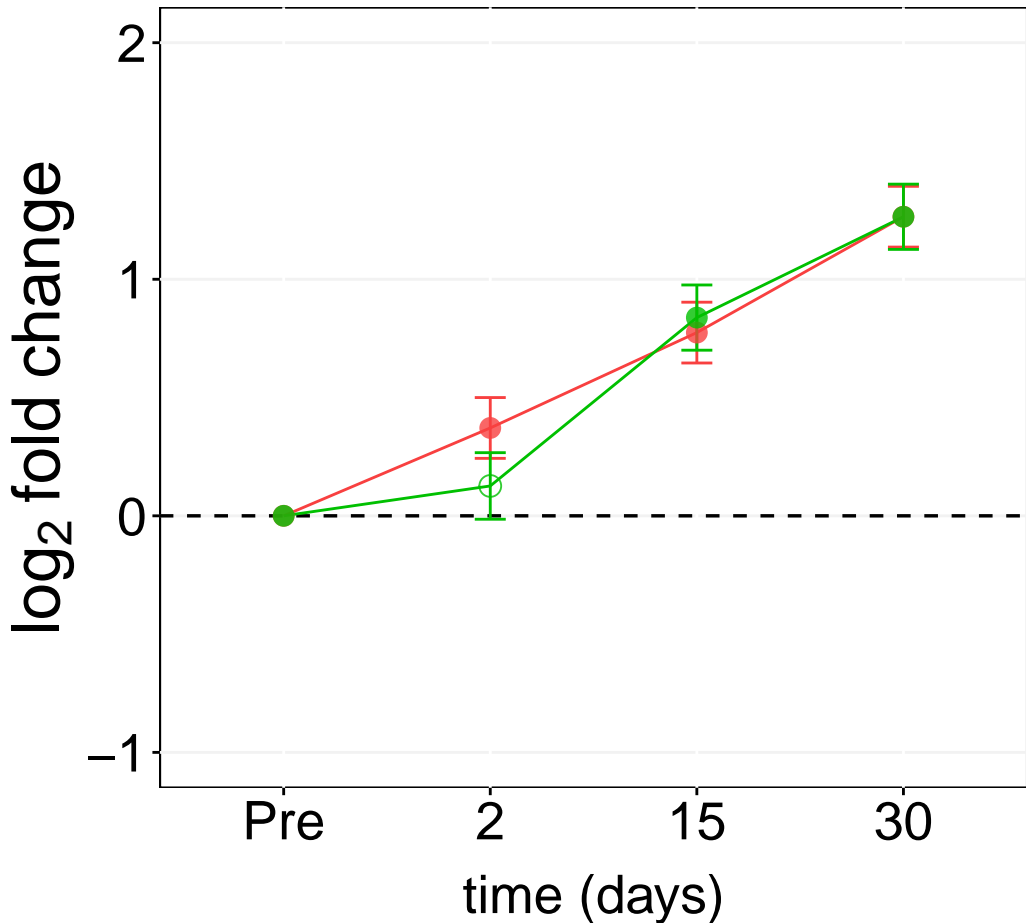

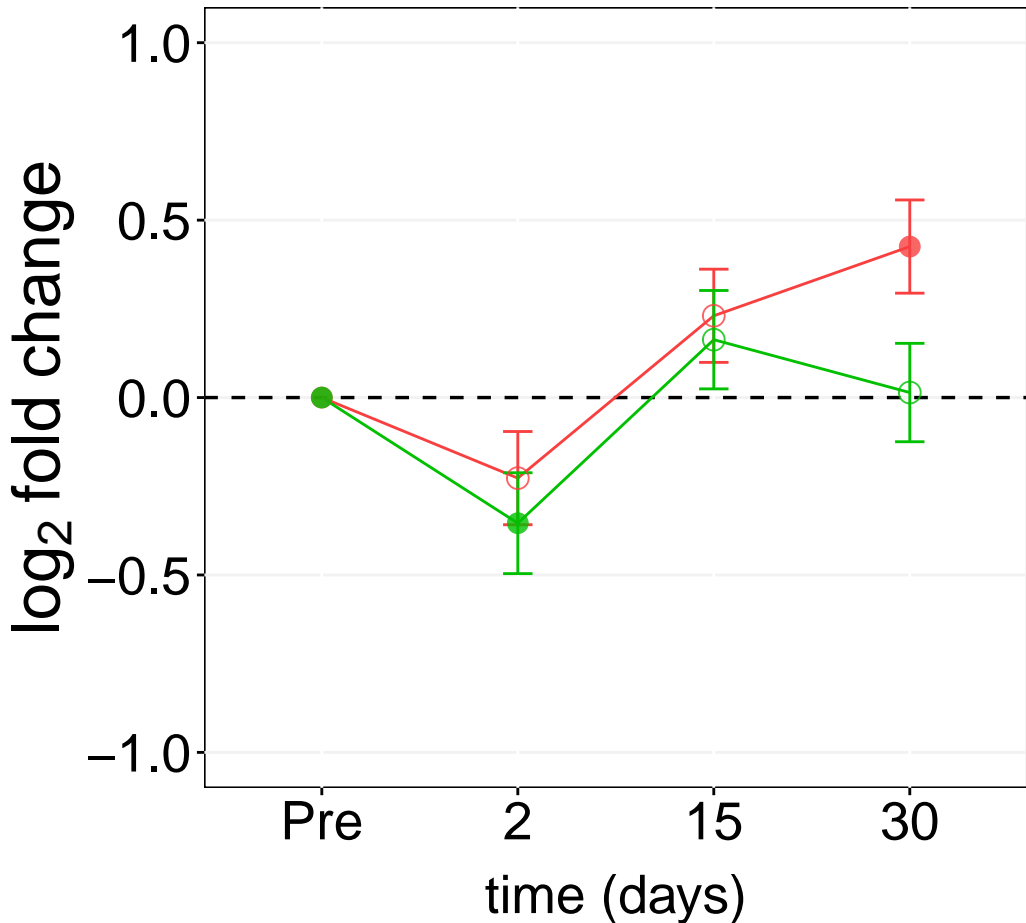

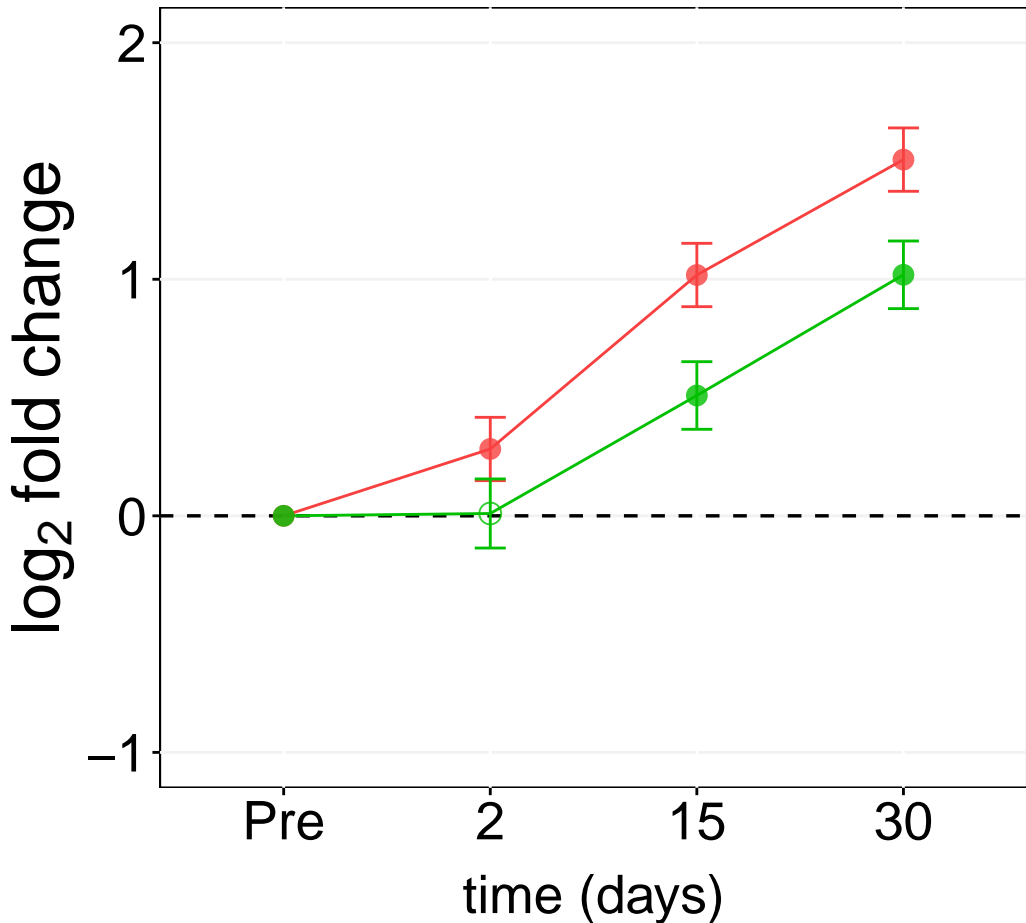

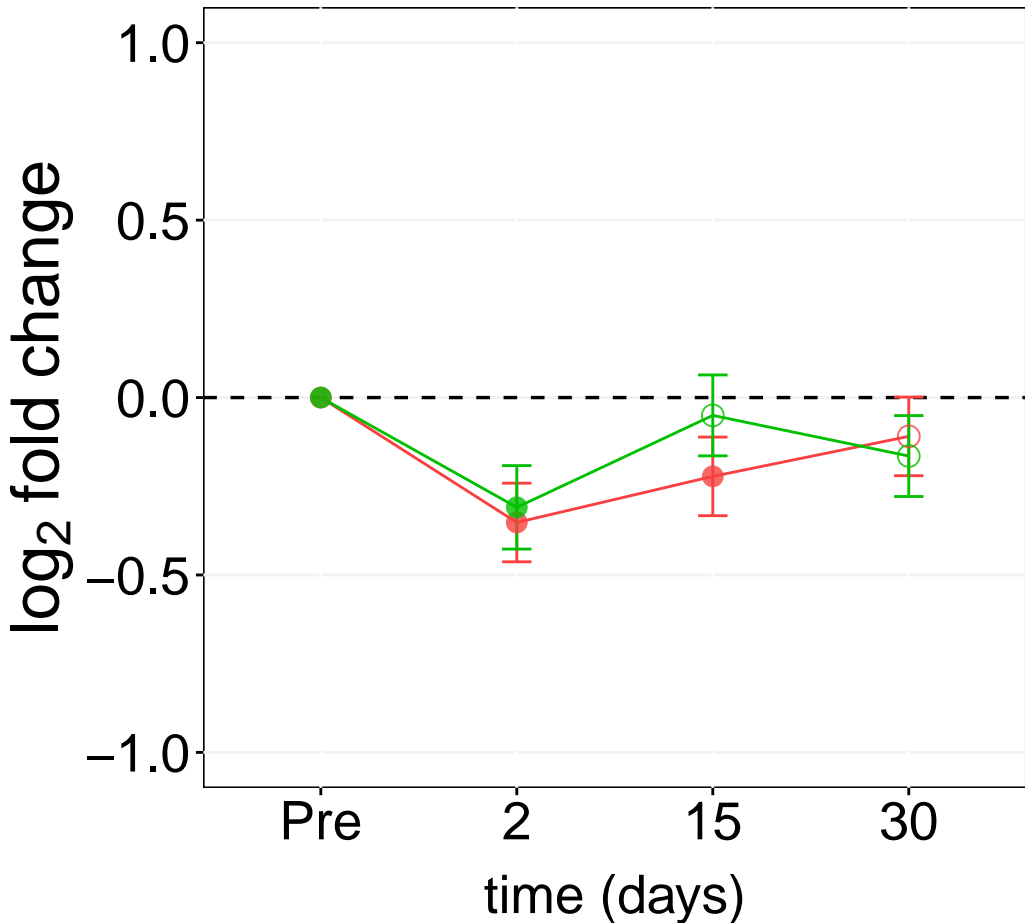

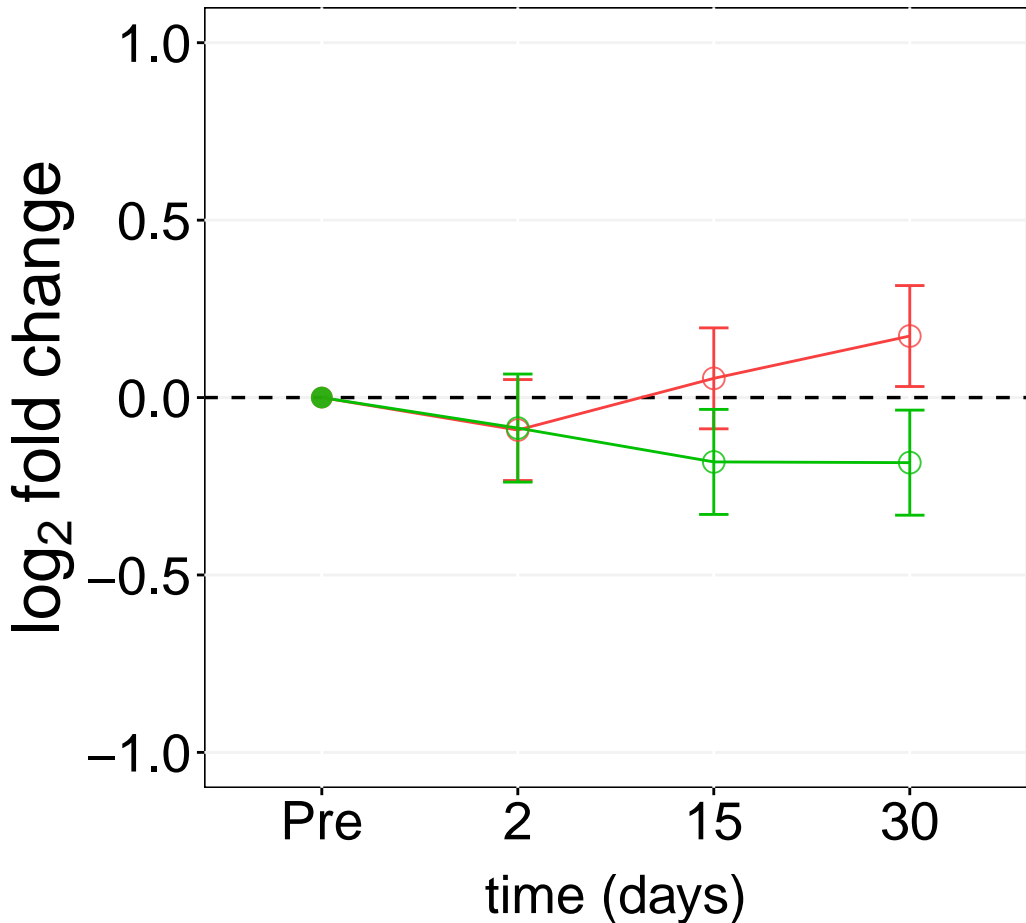

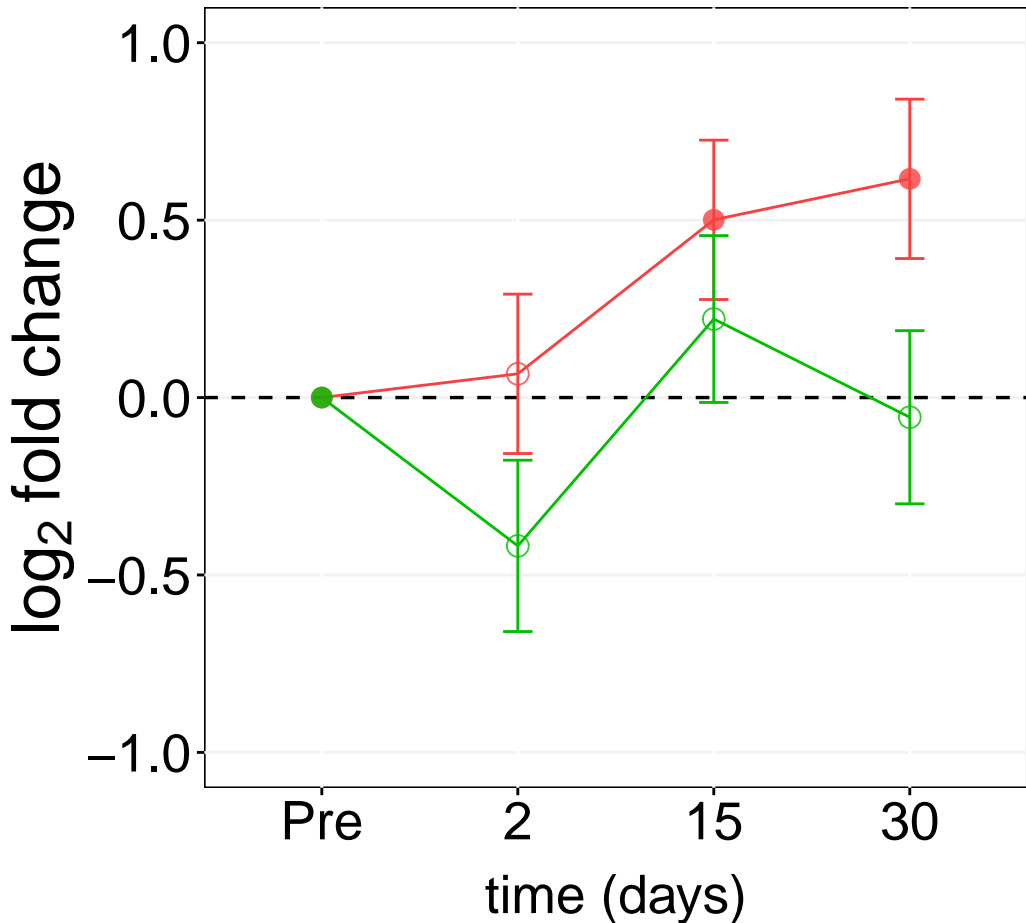

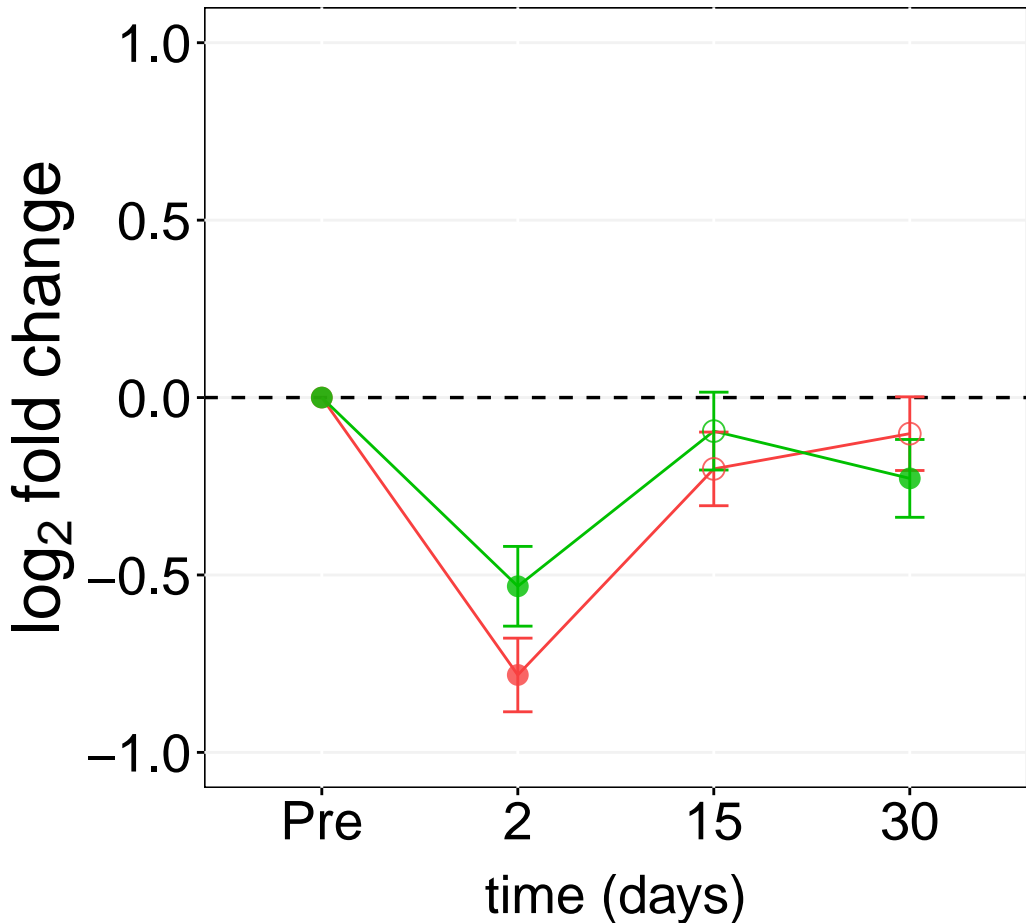

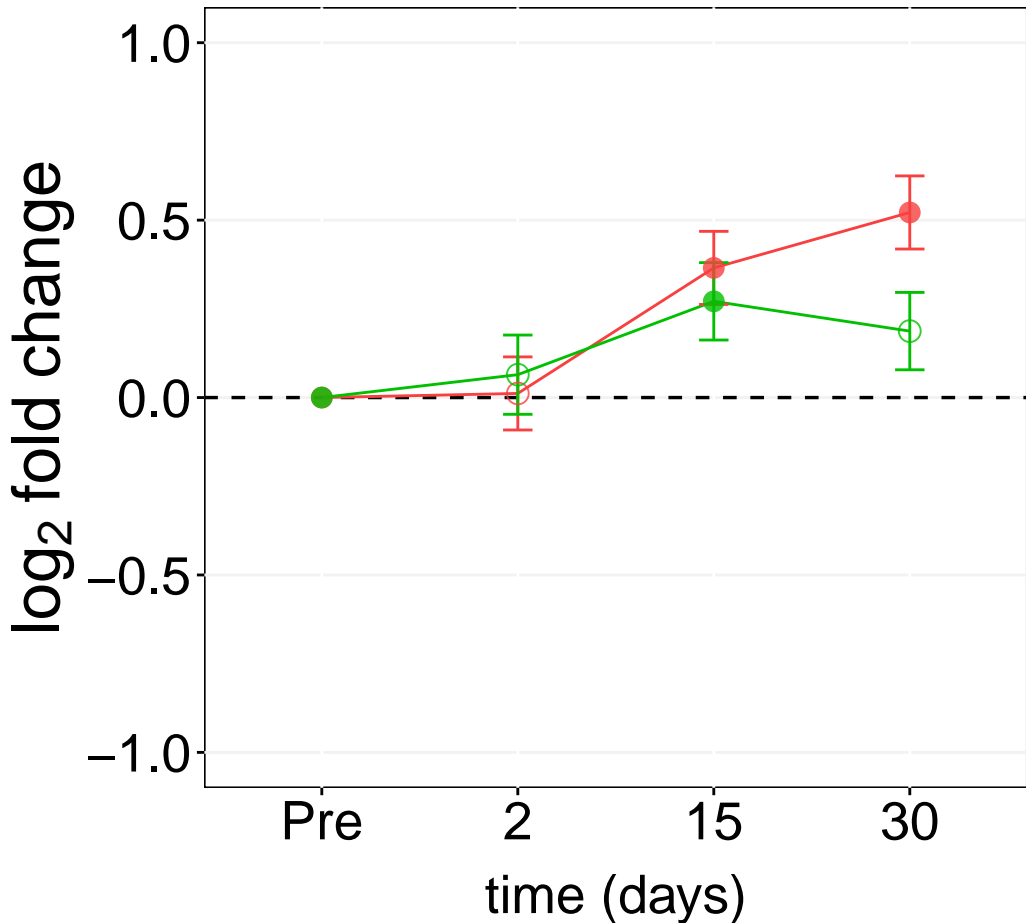



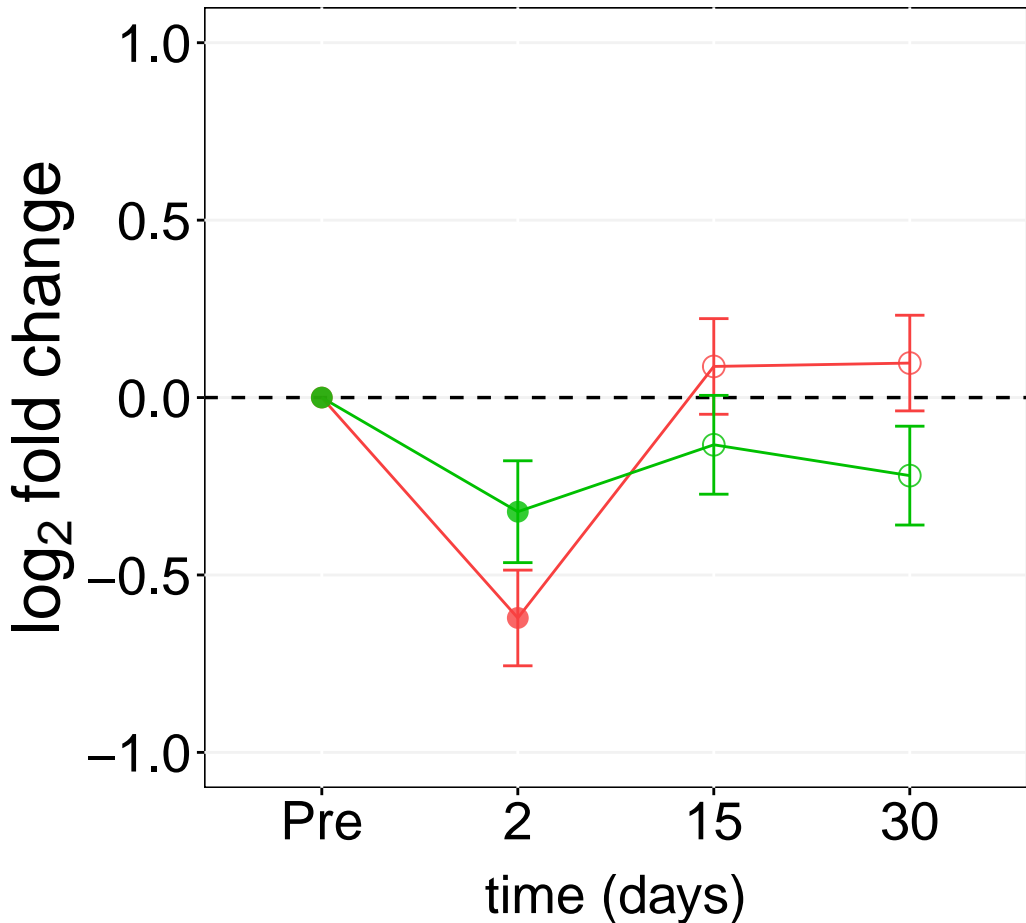

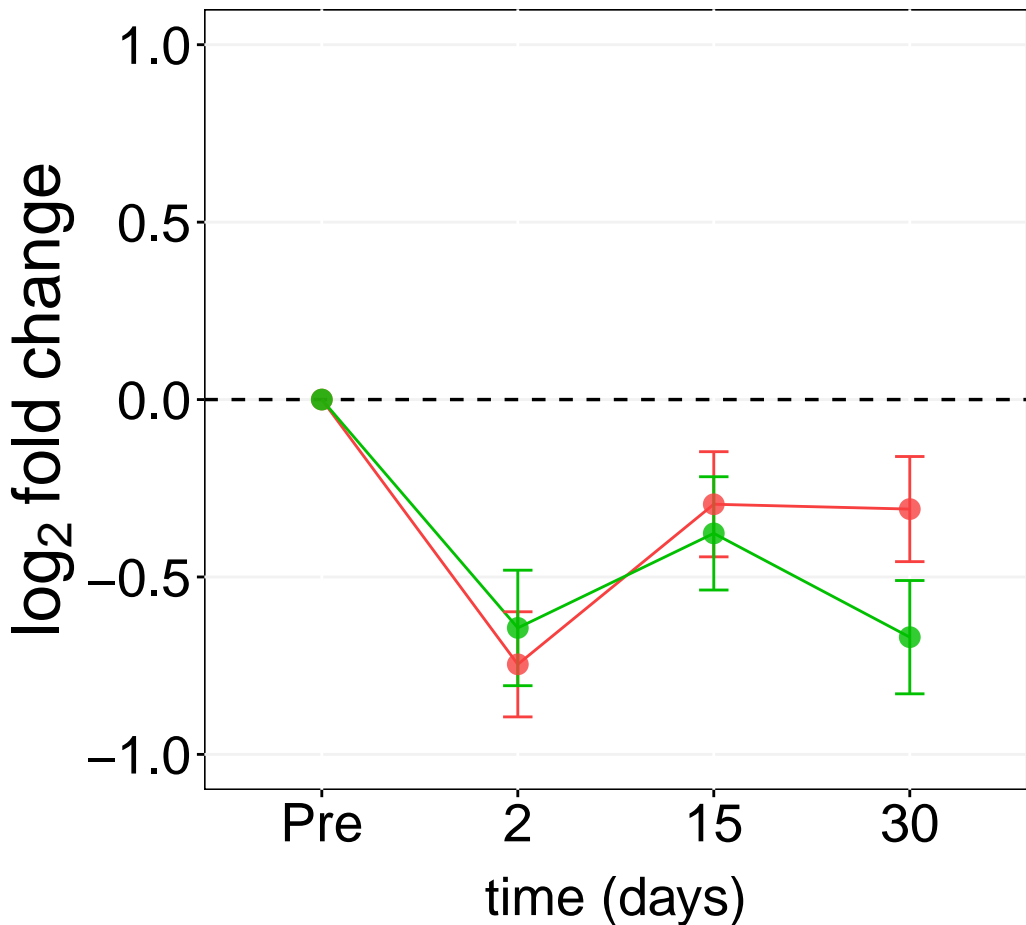

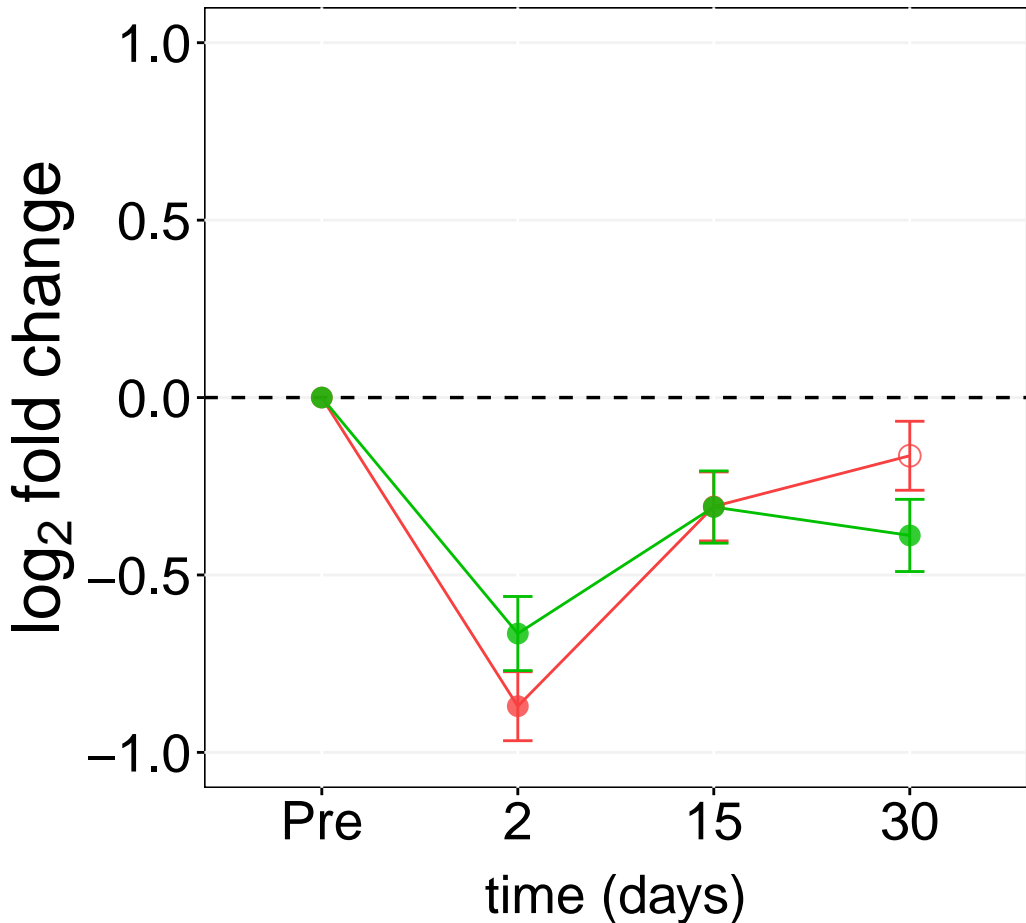

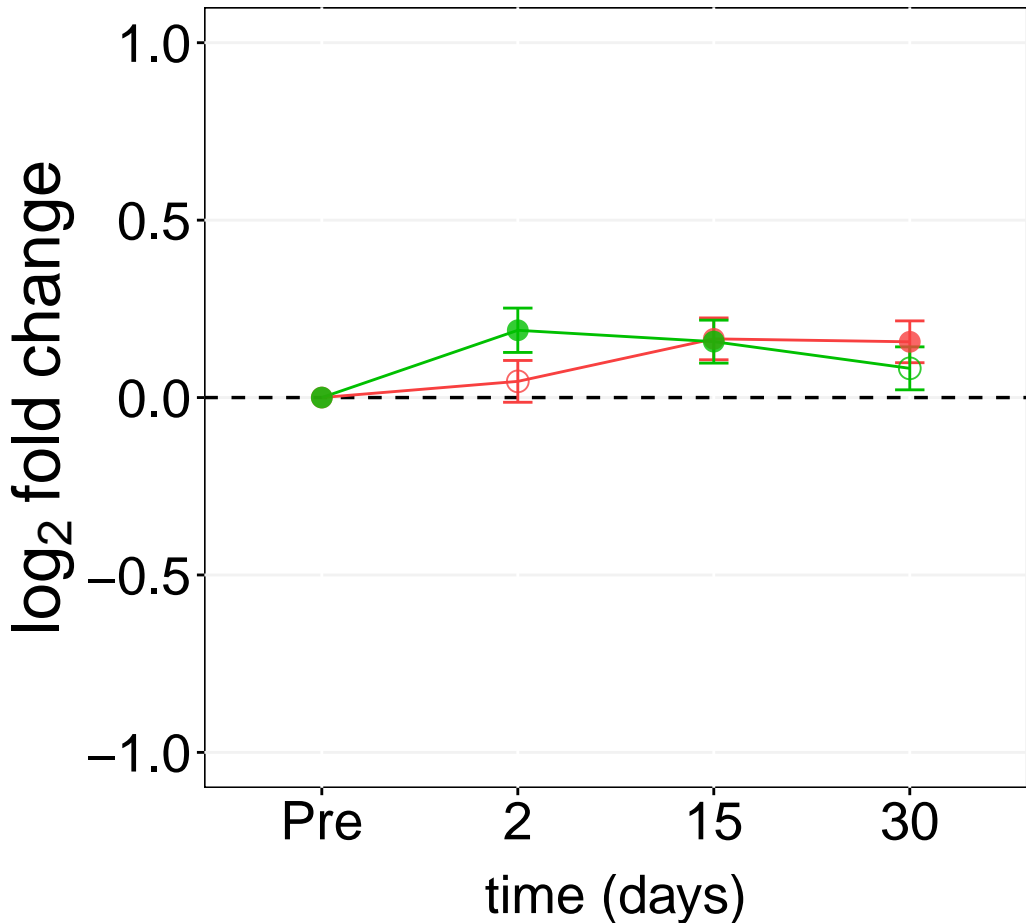

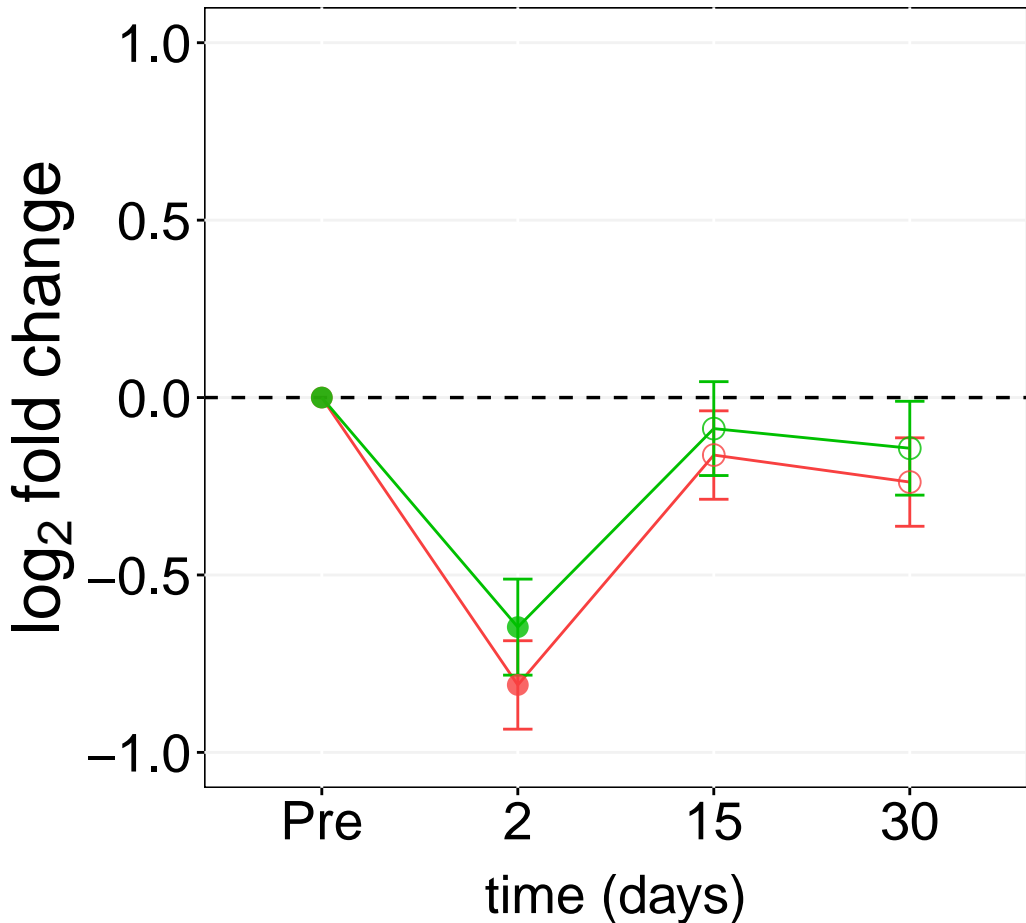

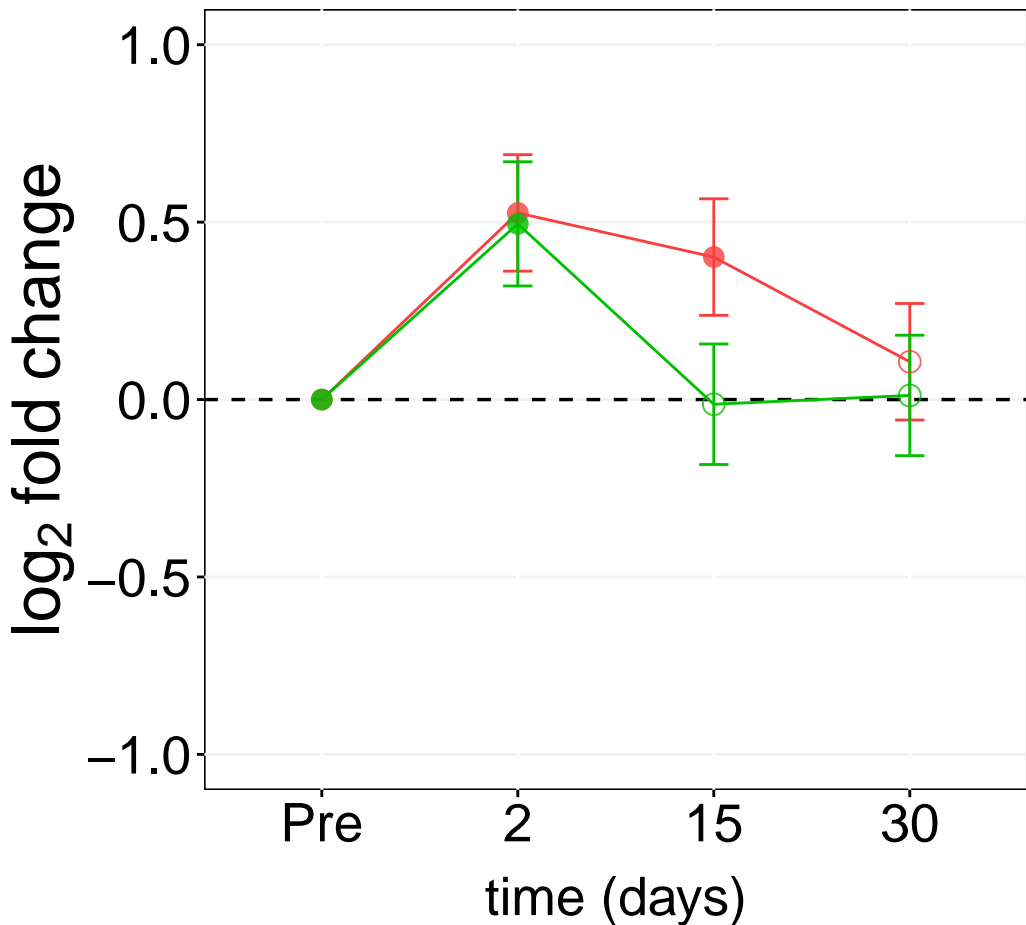

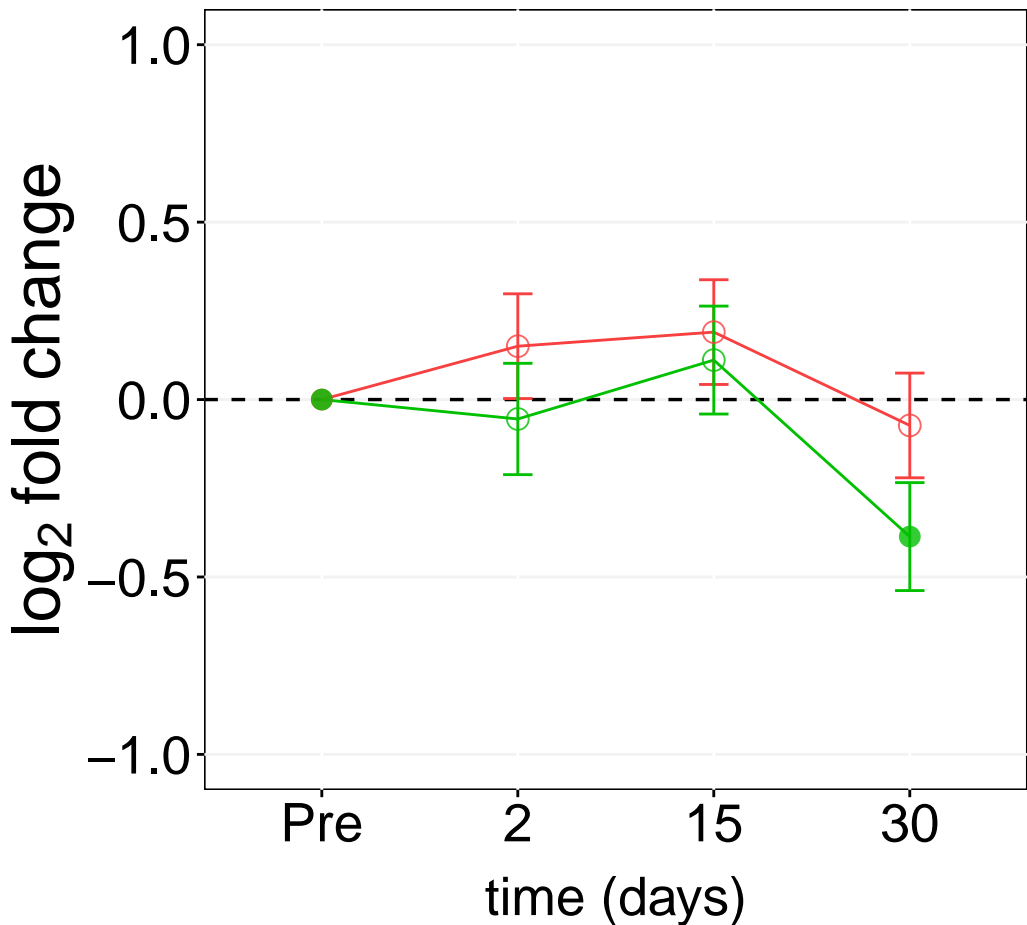

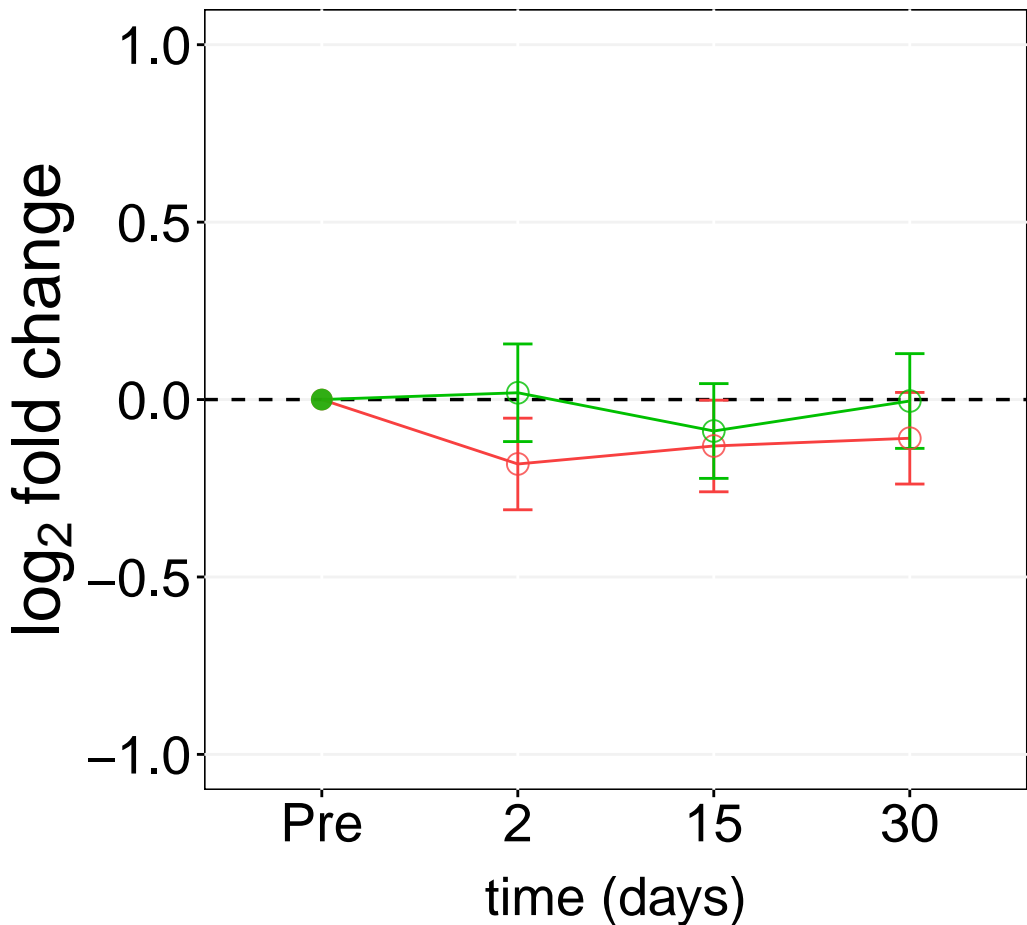



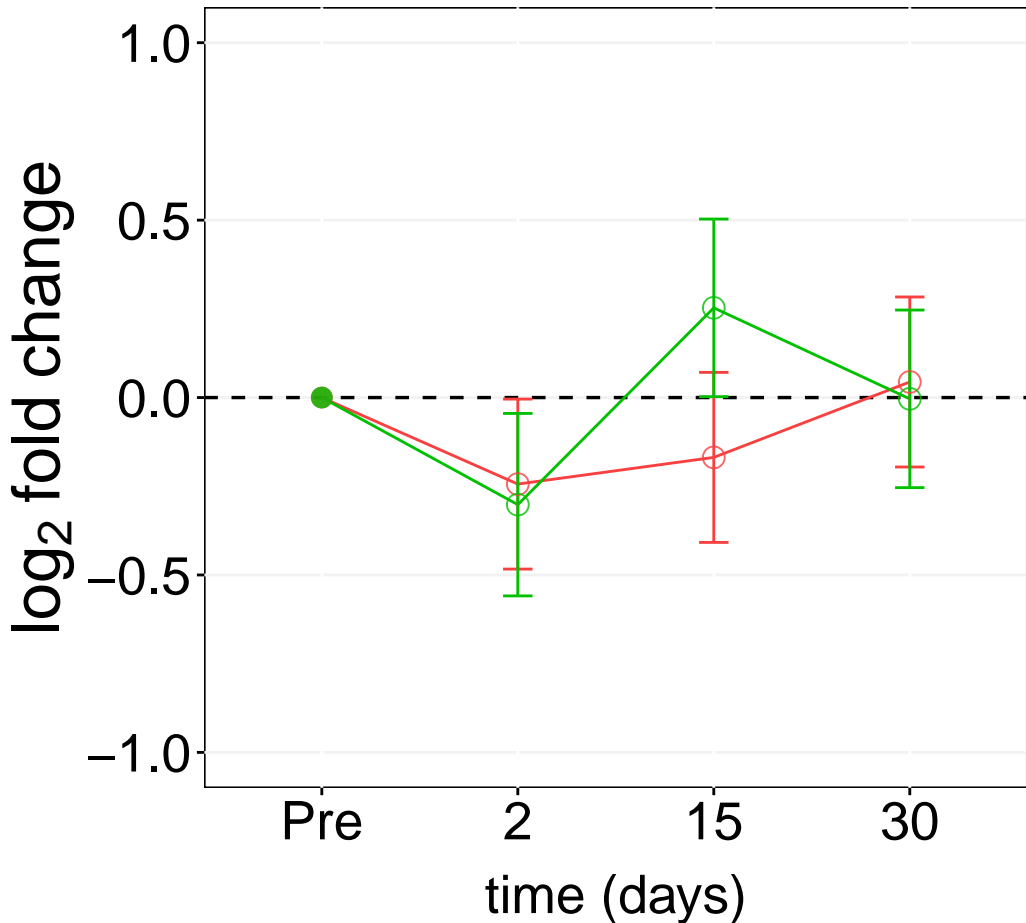

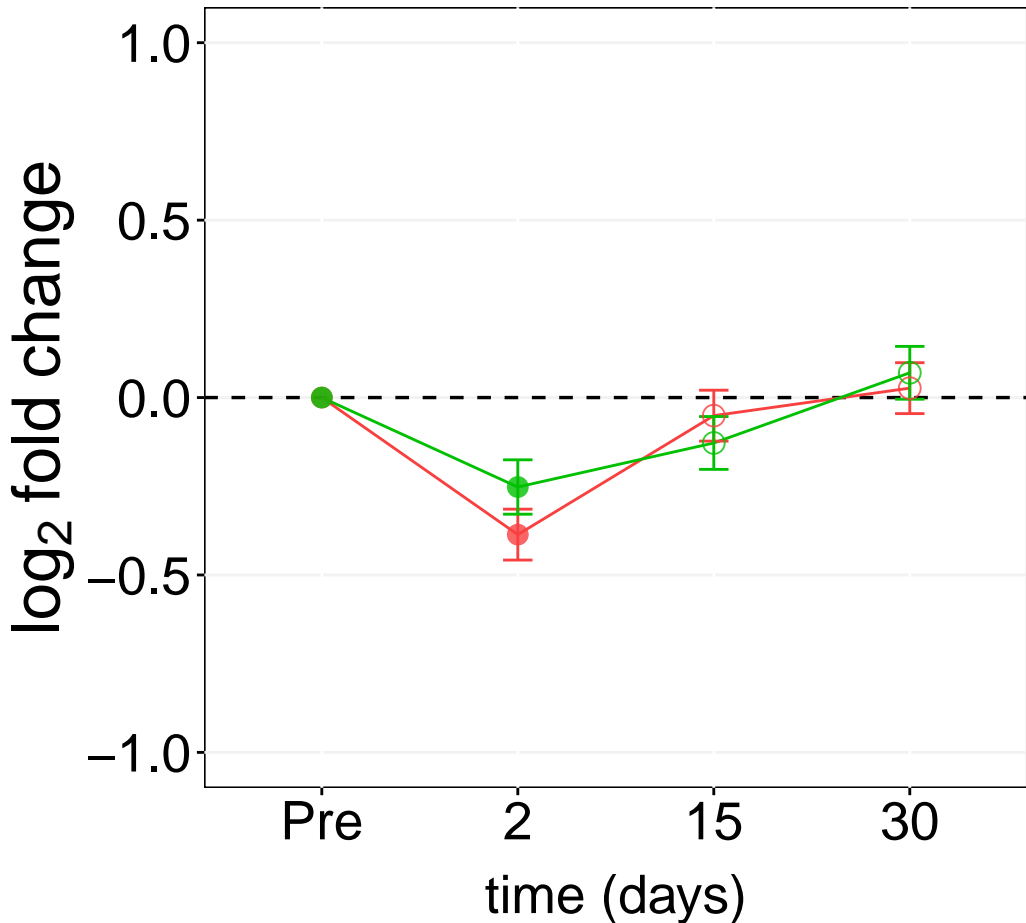

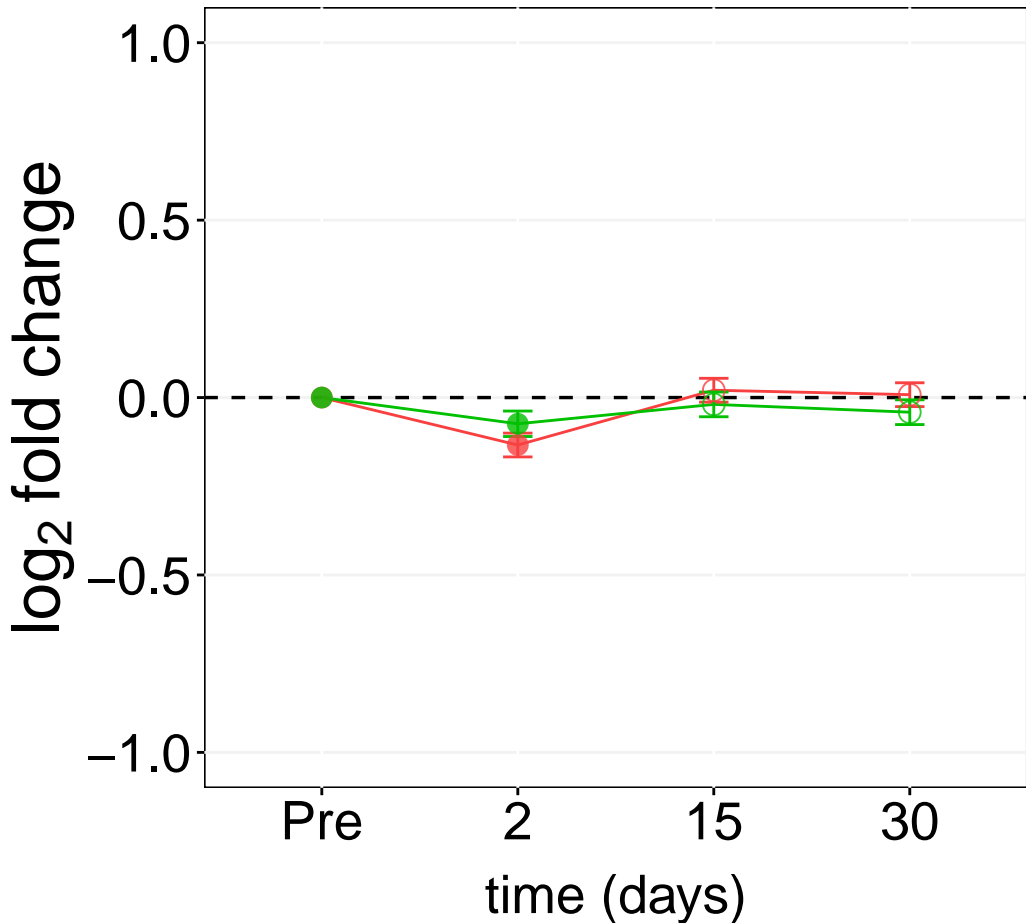

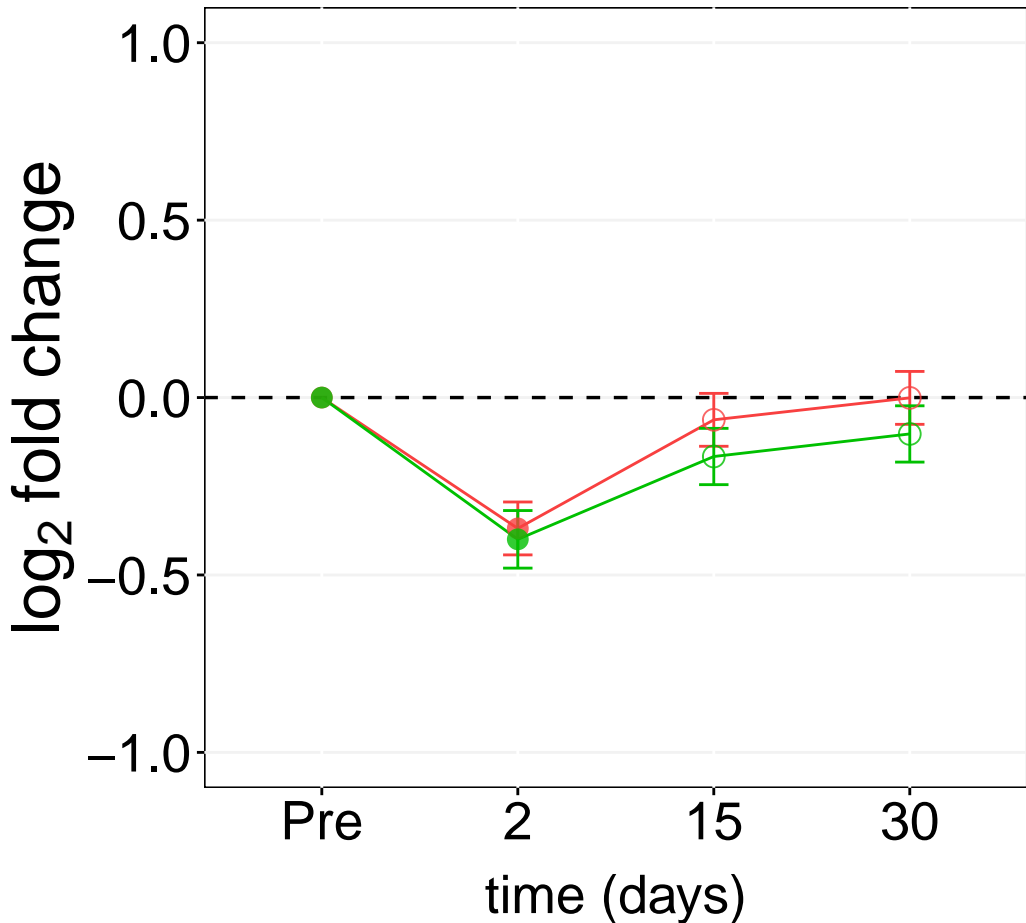

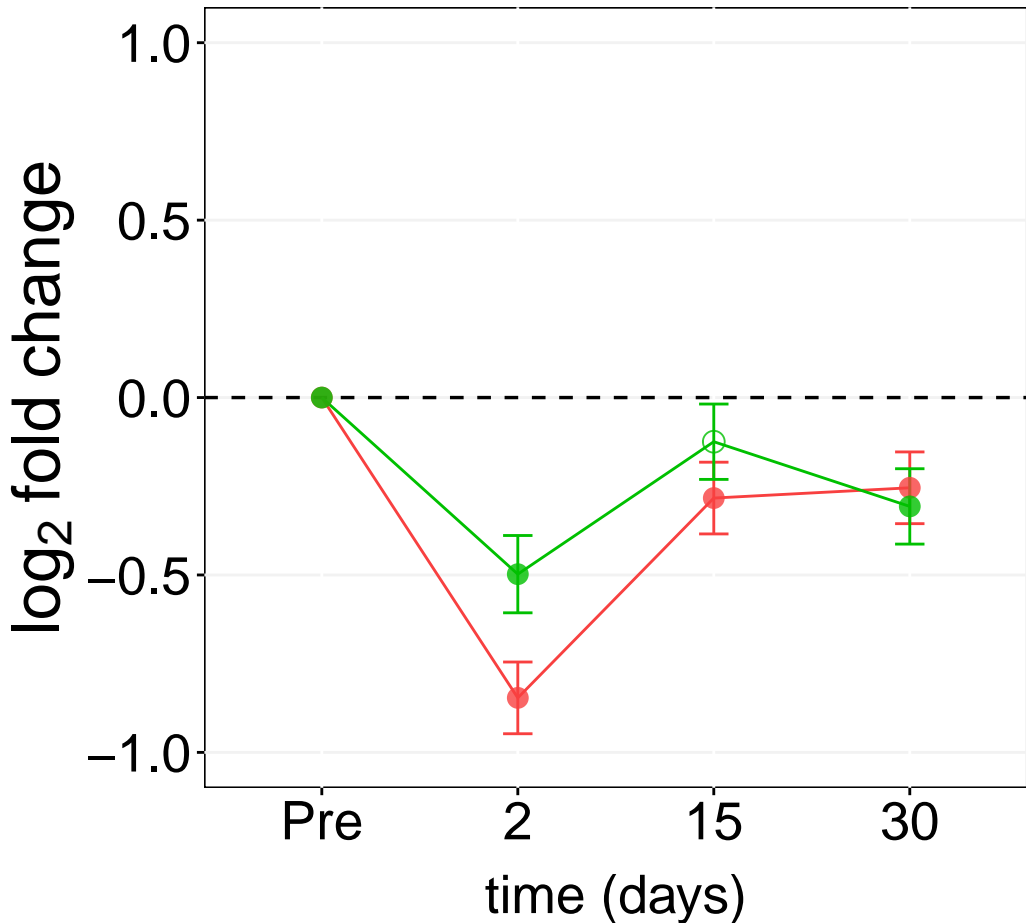

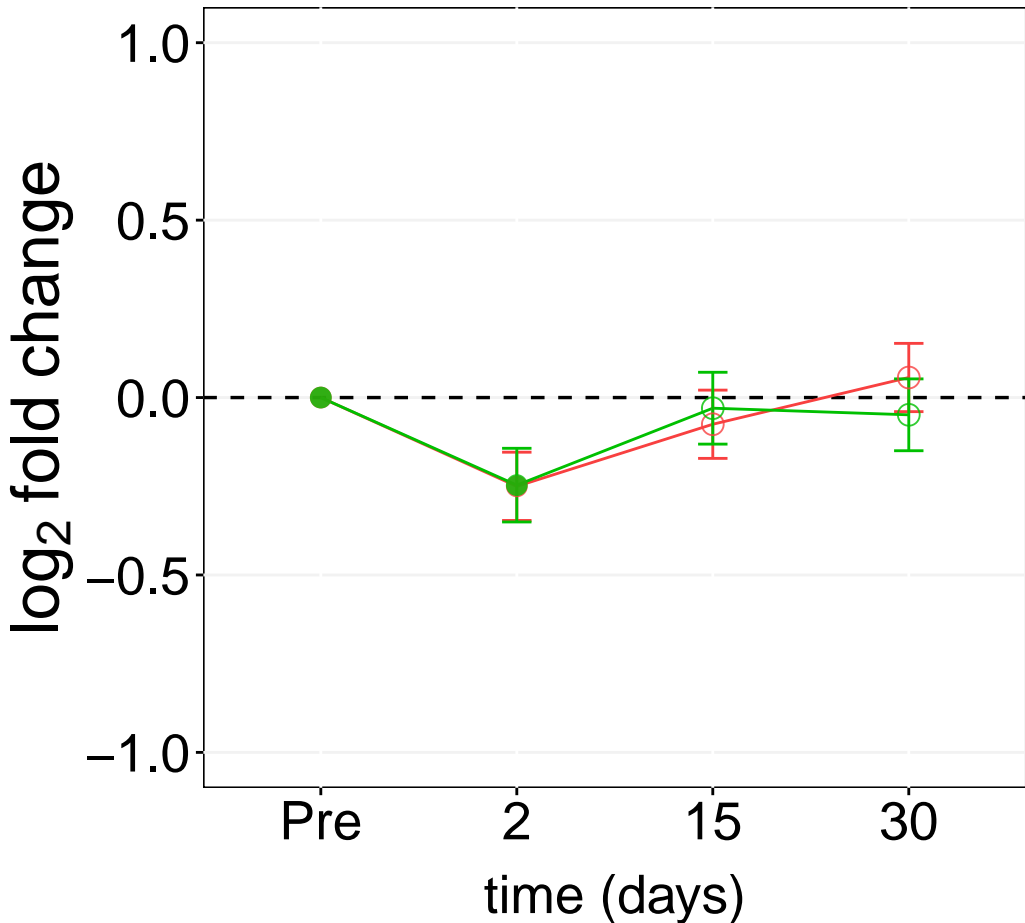

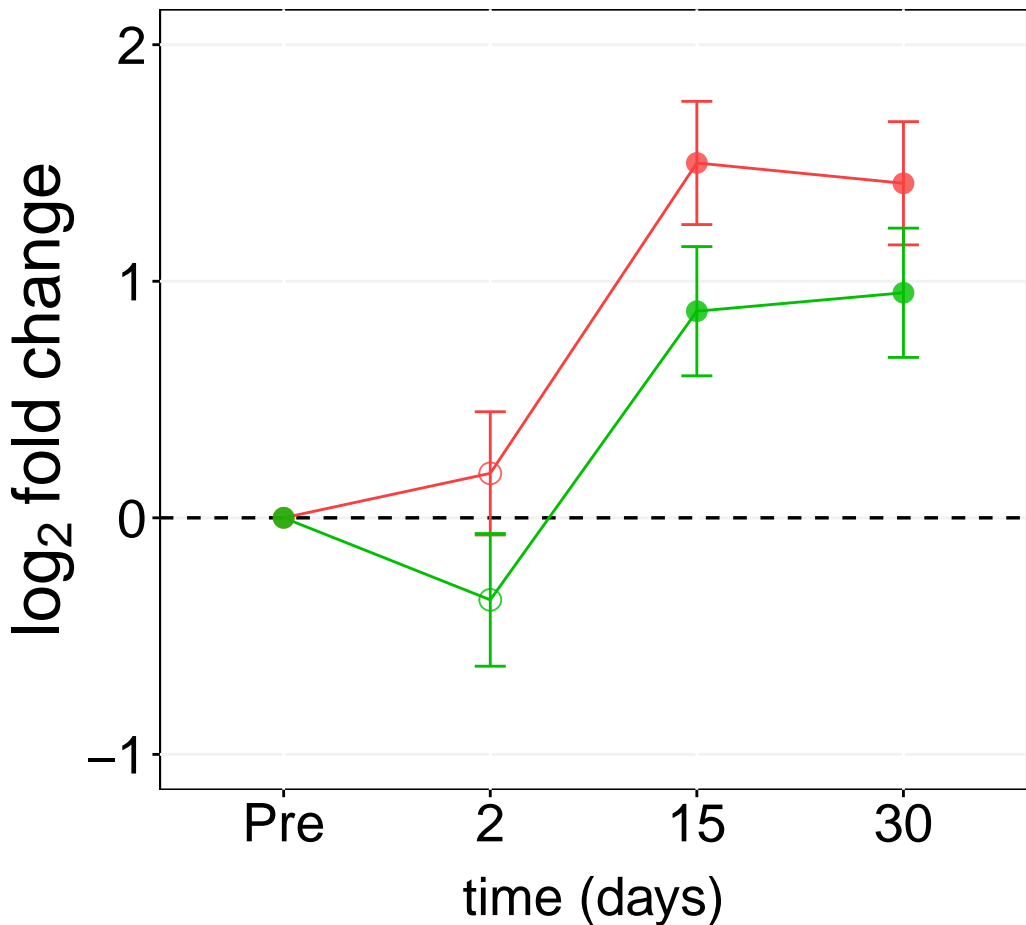

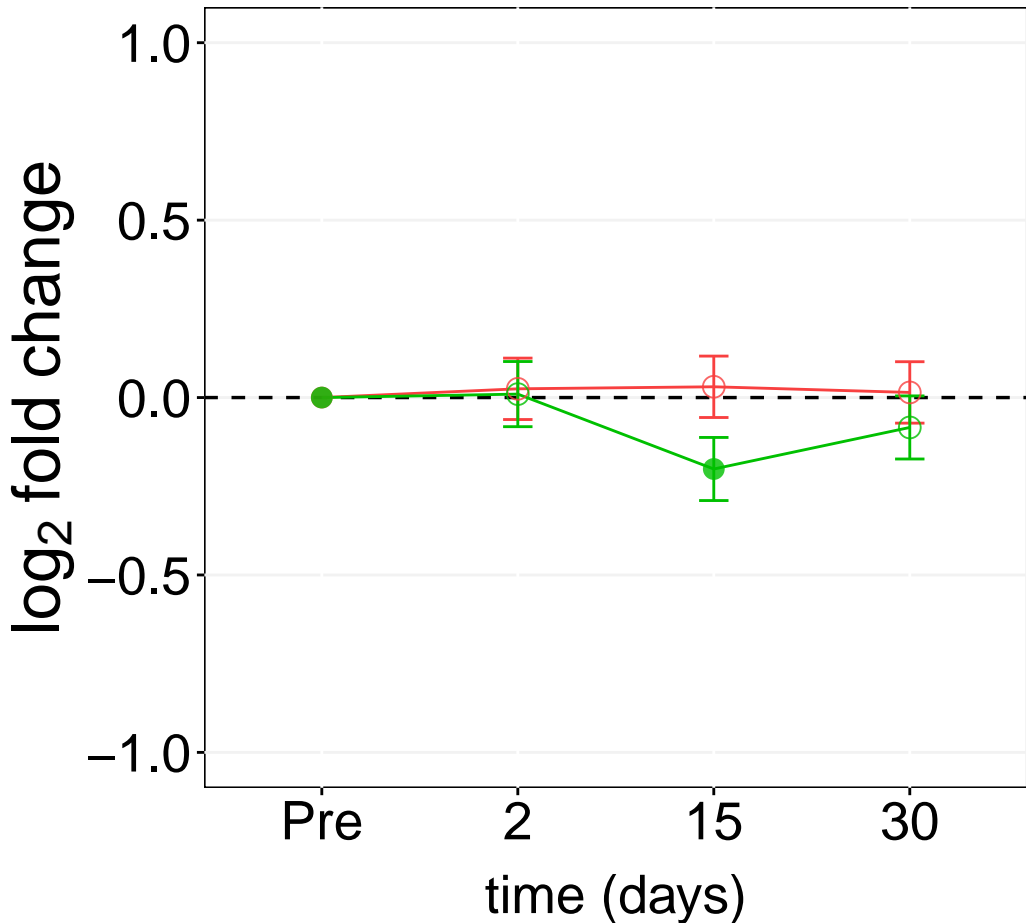



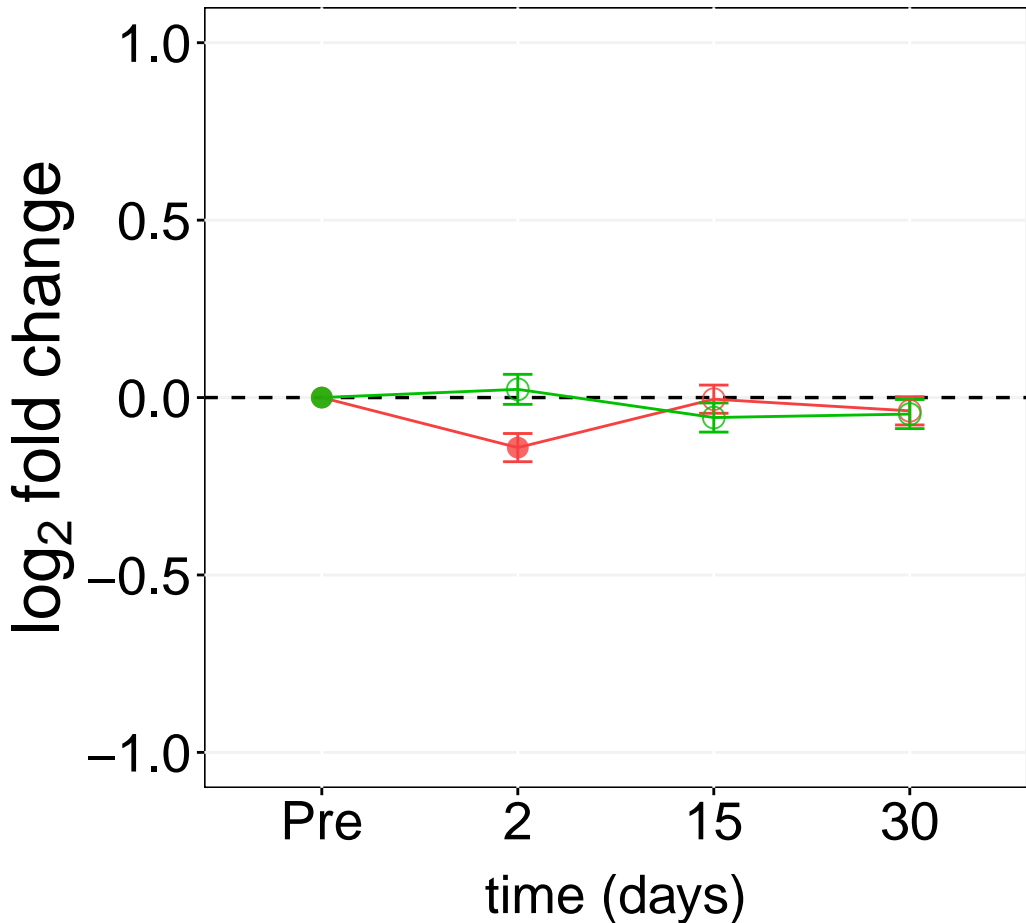

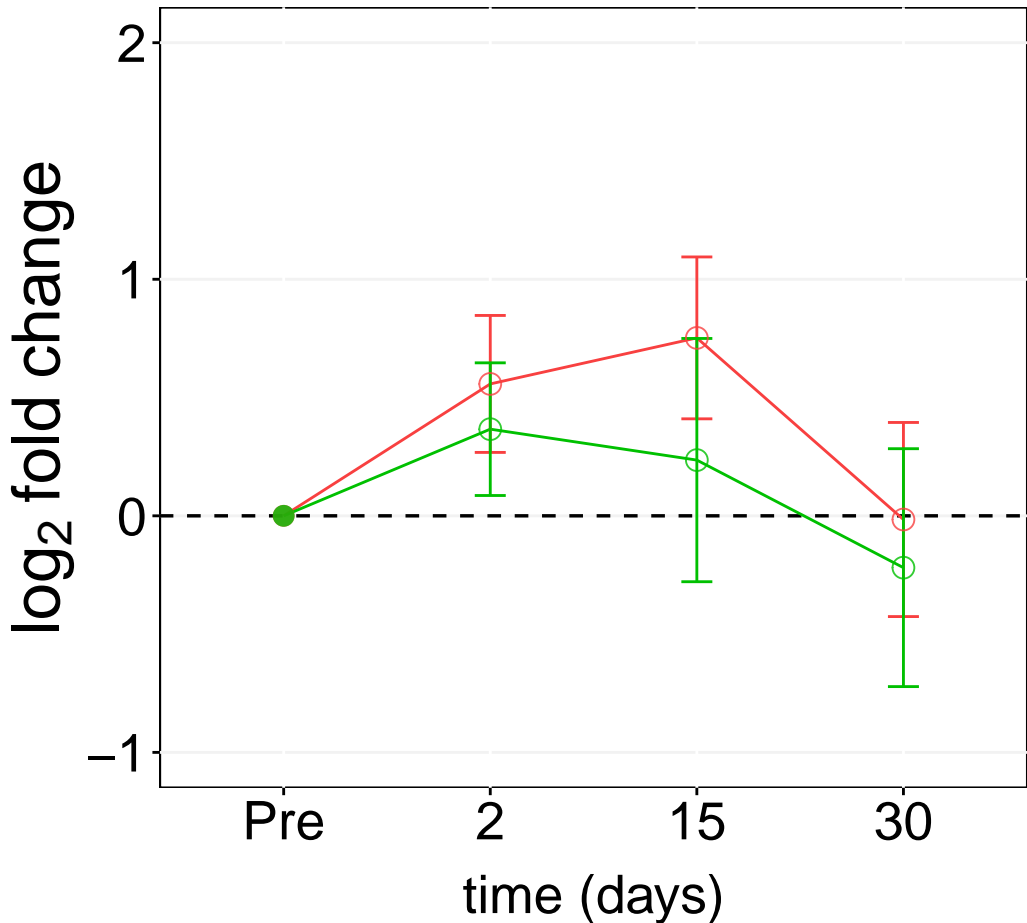

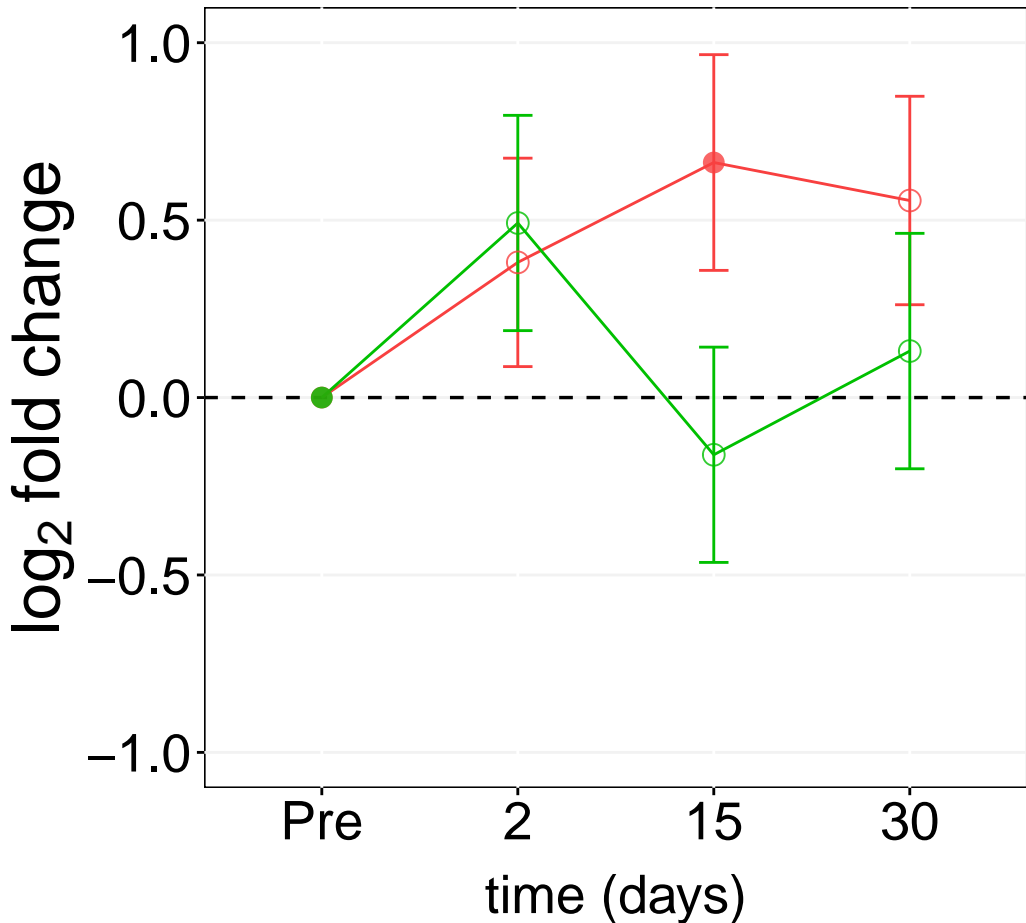

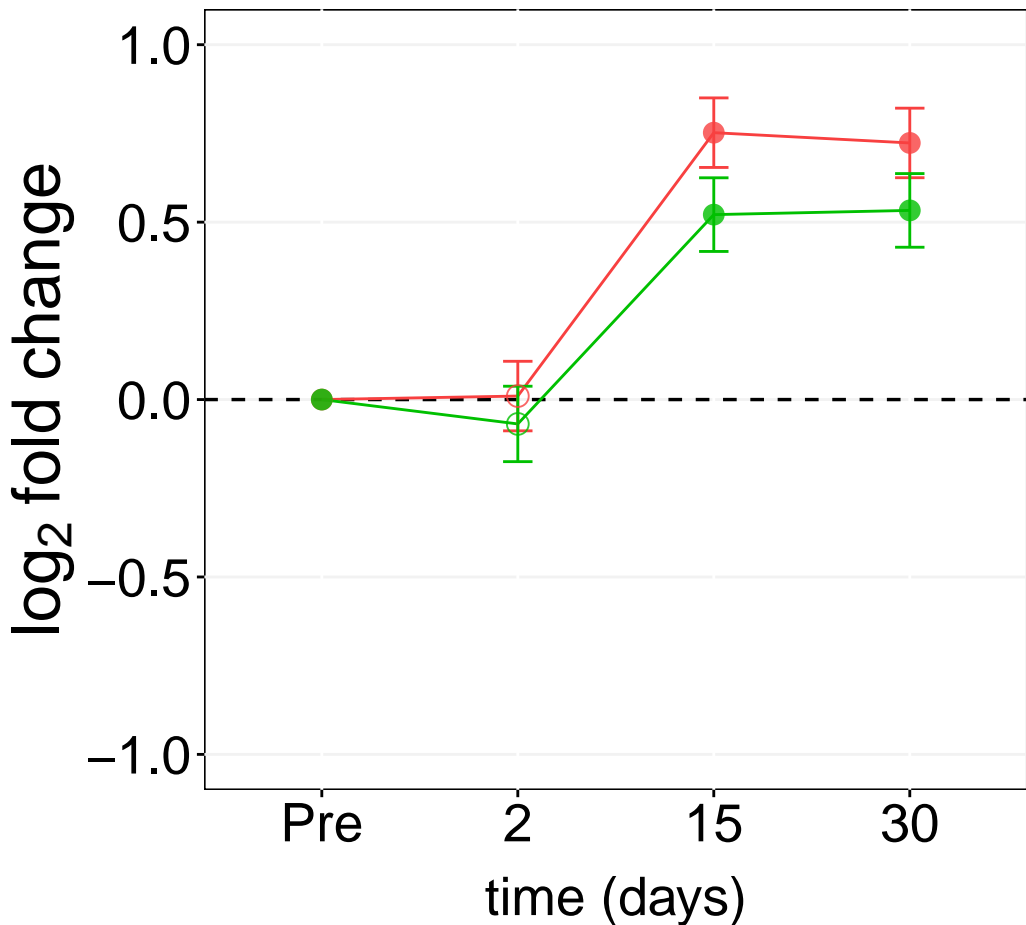

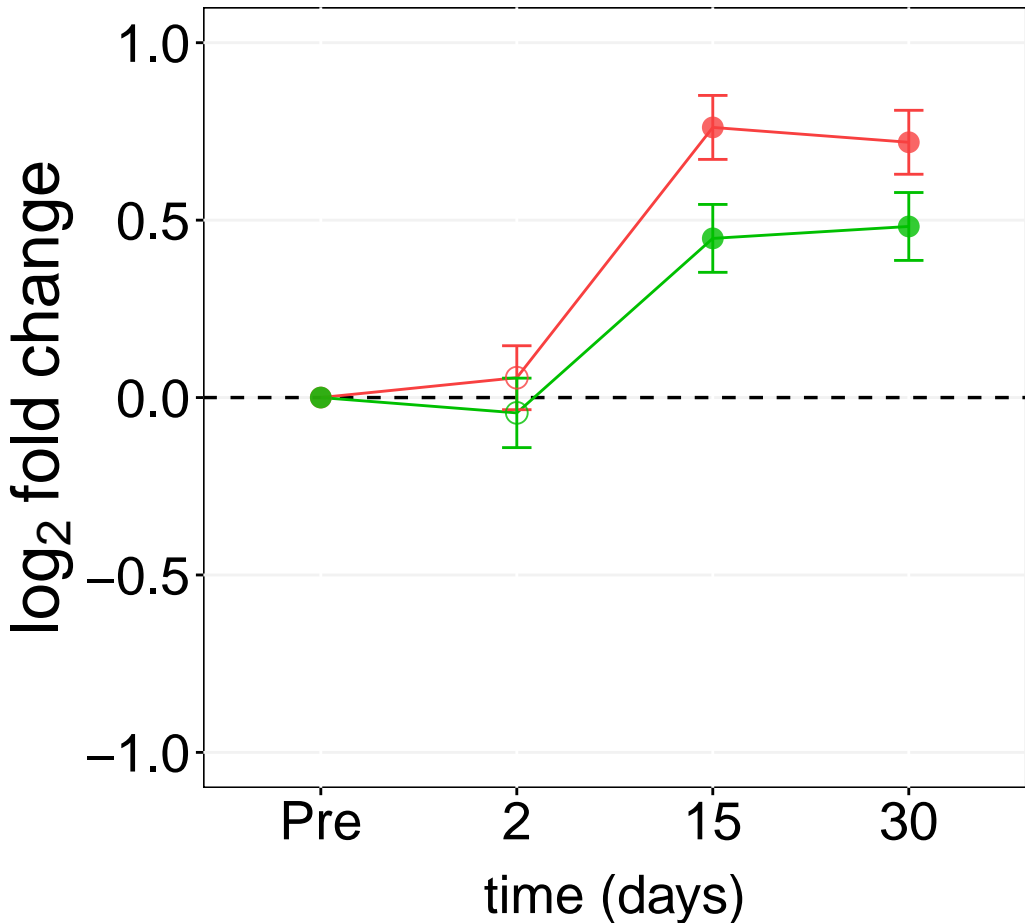

$\log_2$  fold change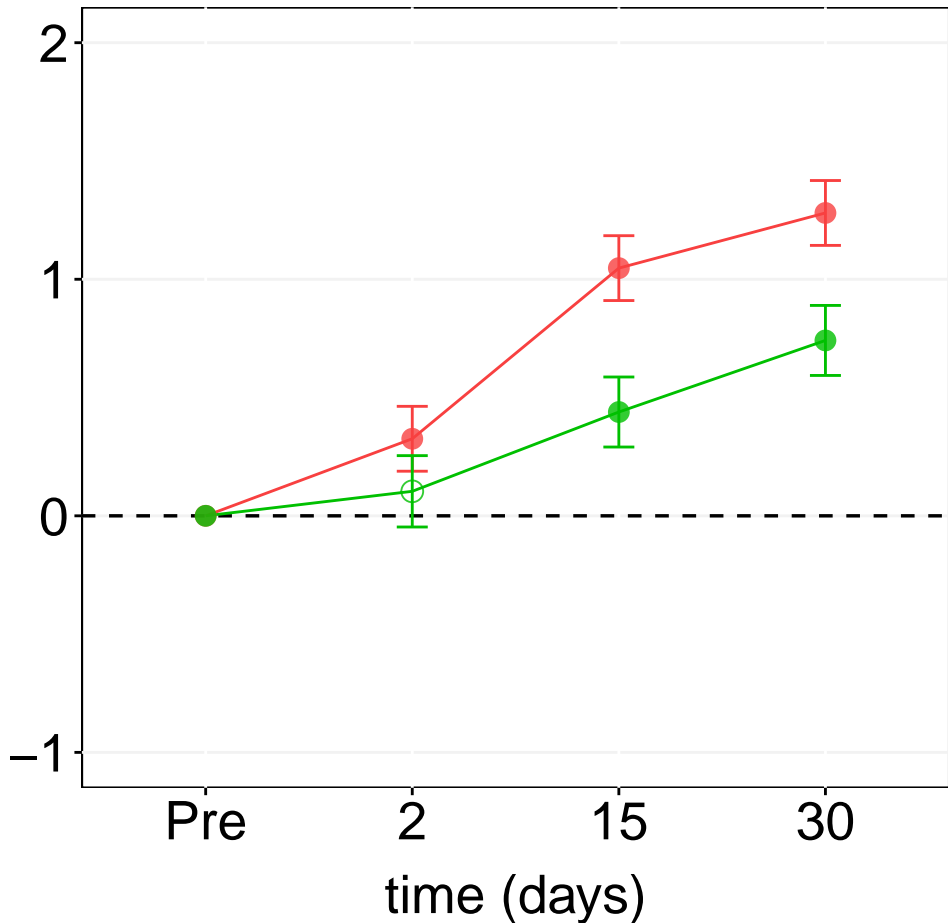

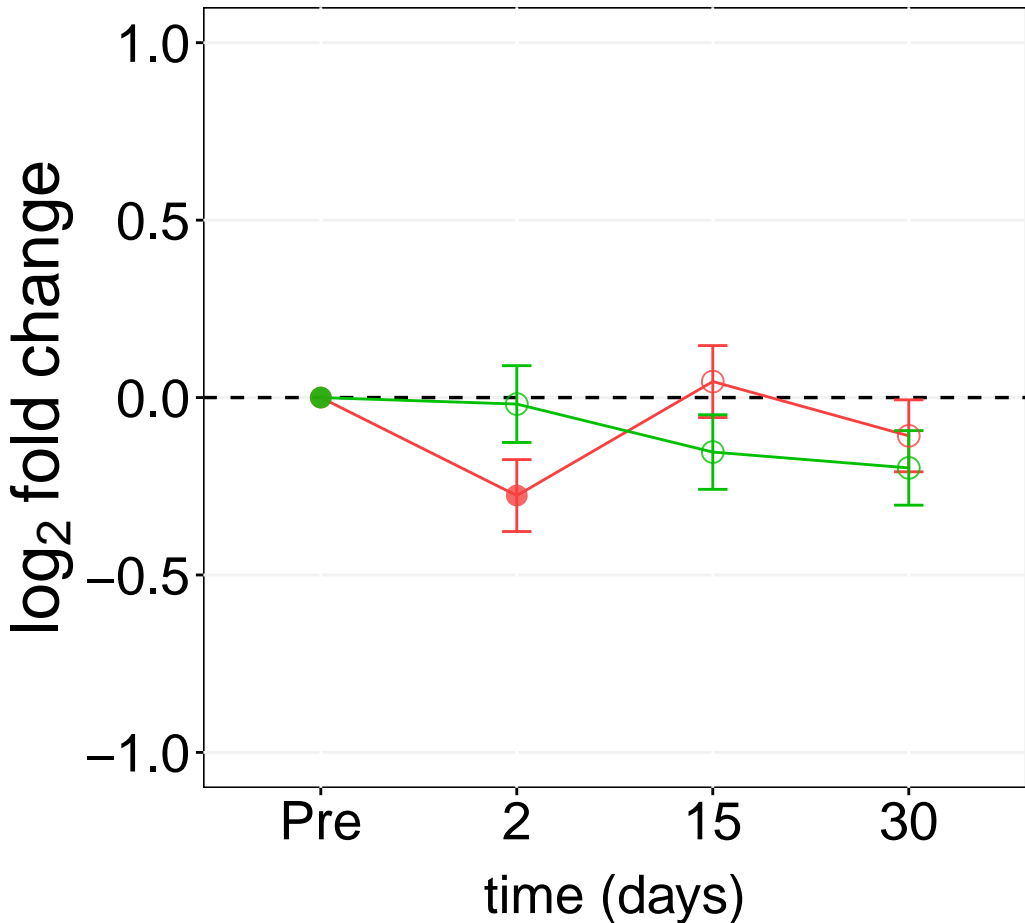

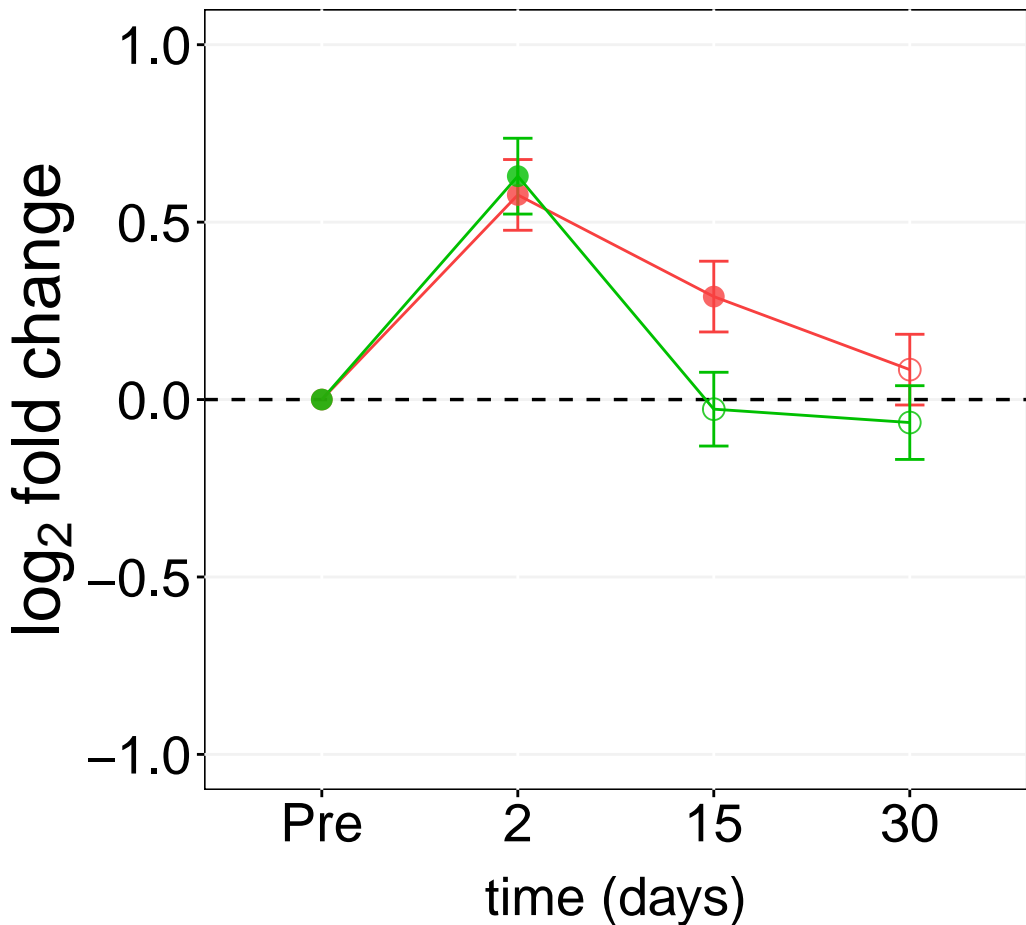



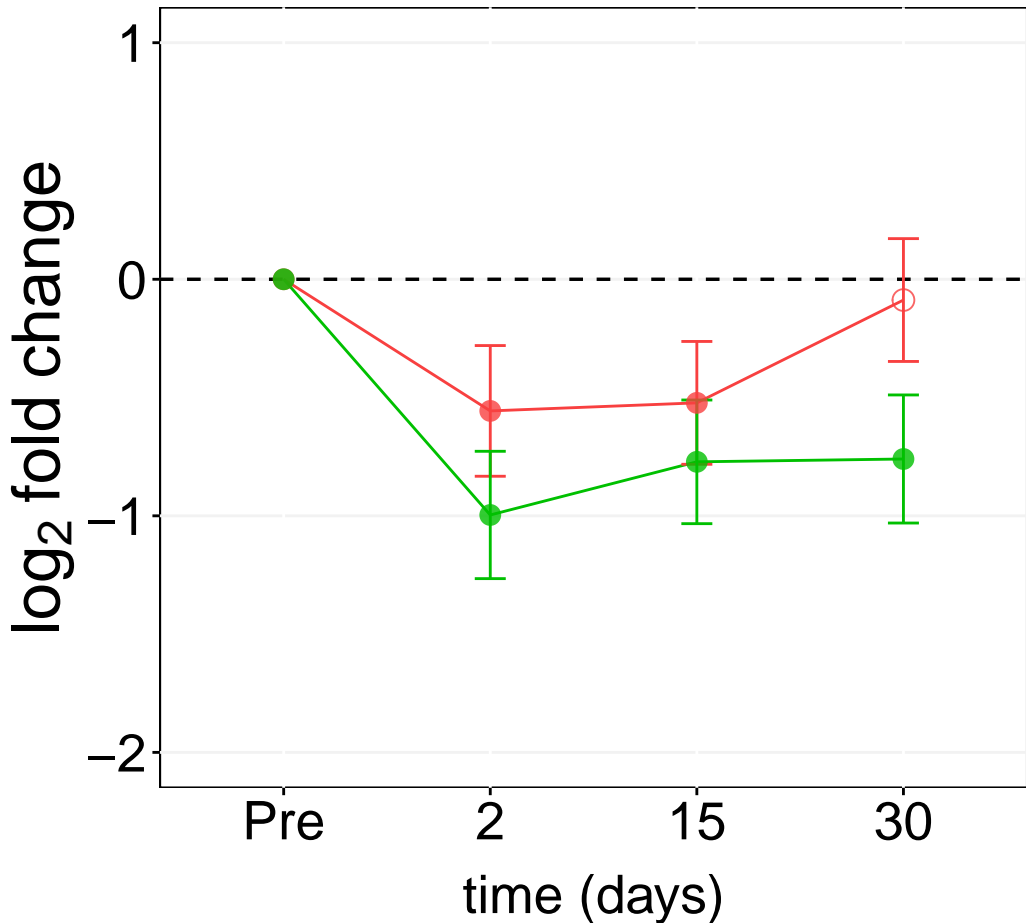

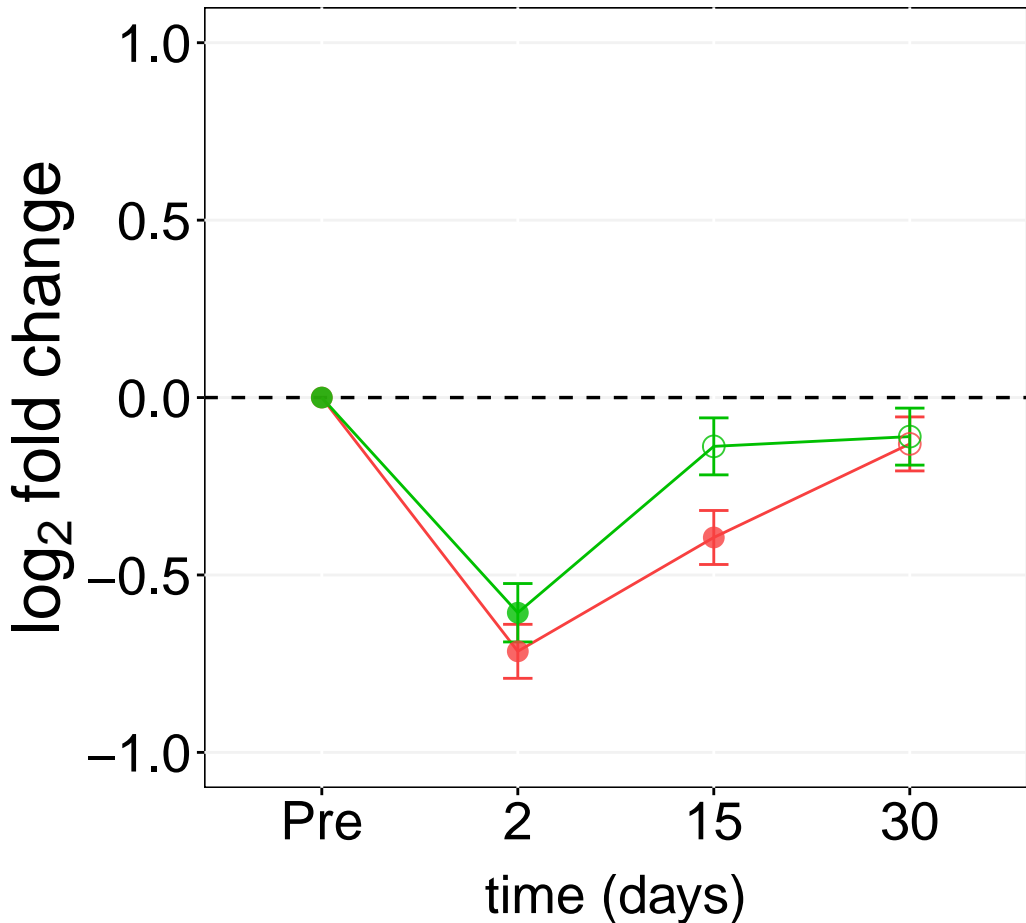

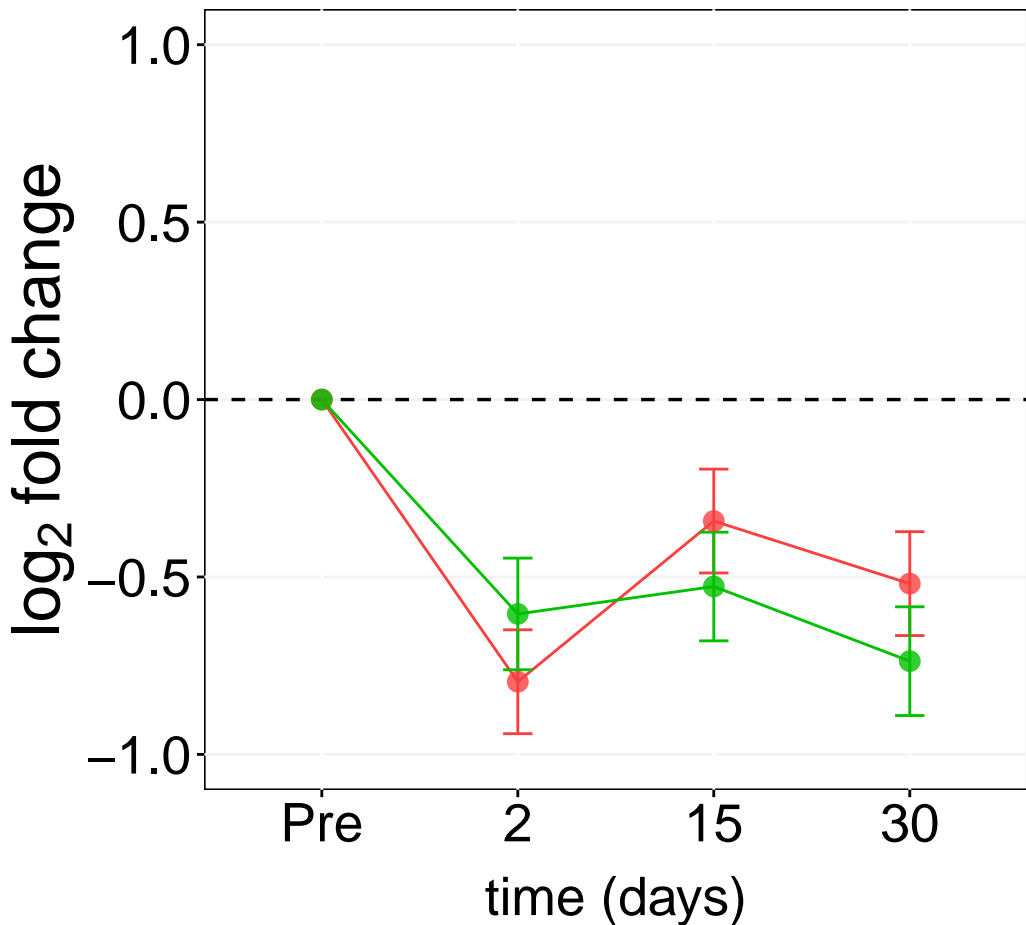

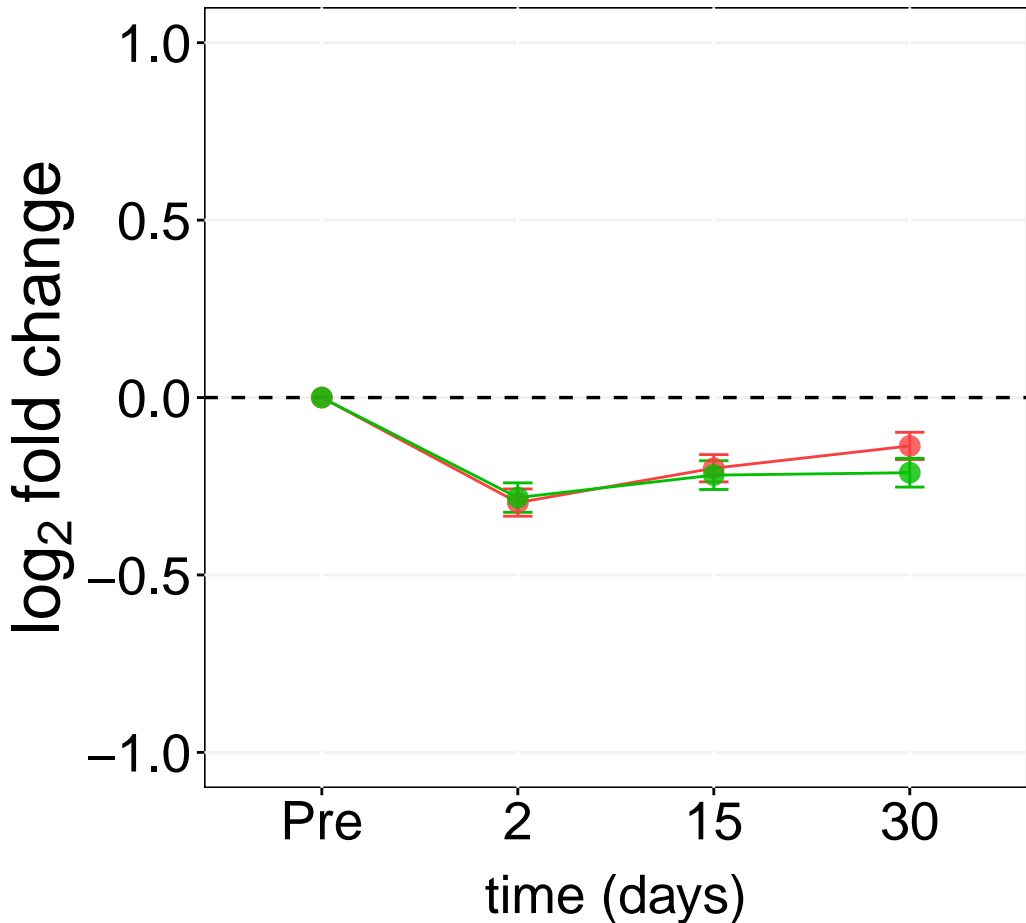

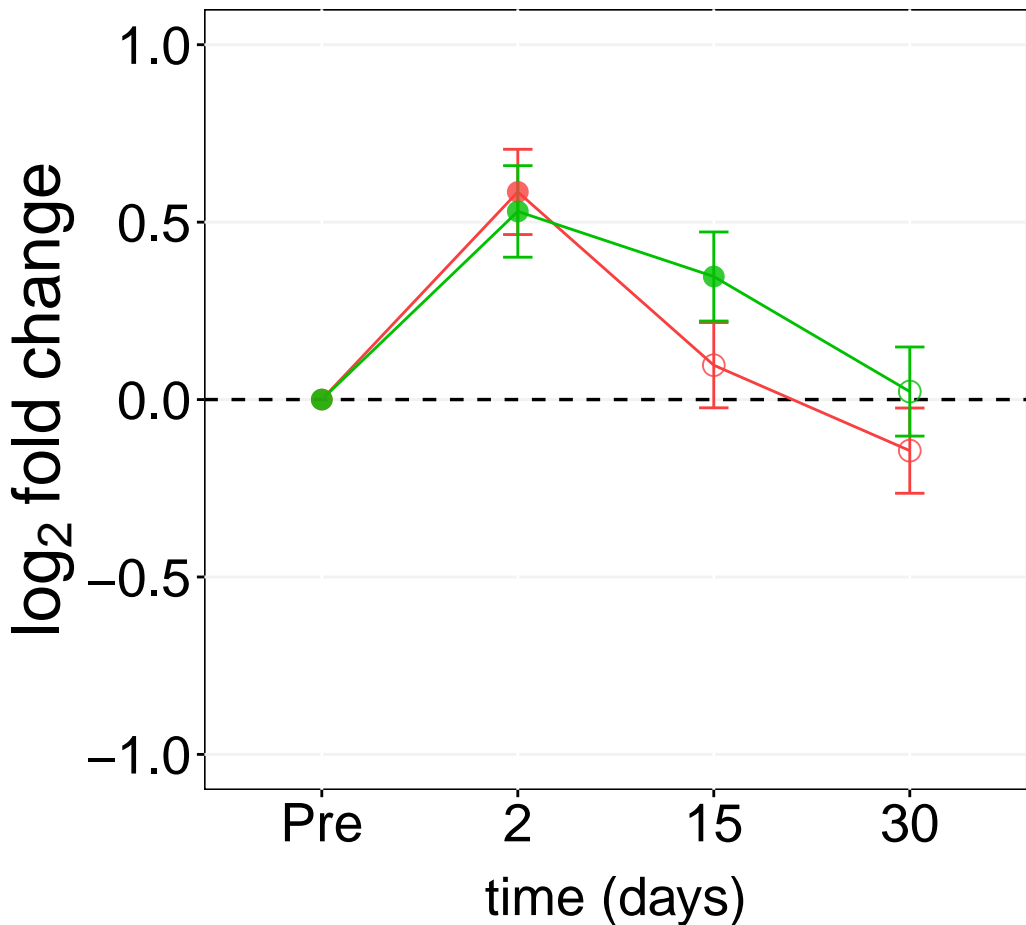

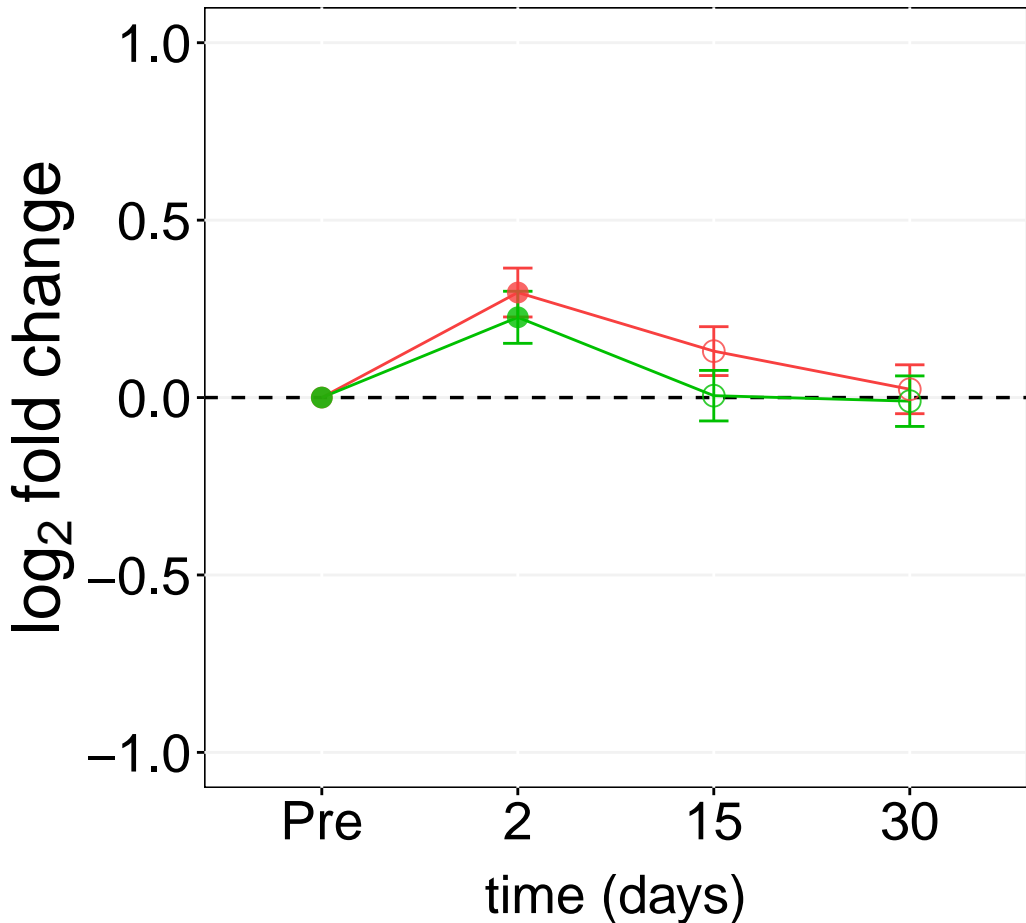

$\log_2$  fold change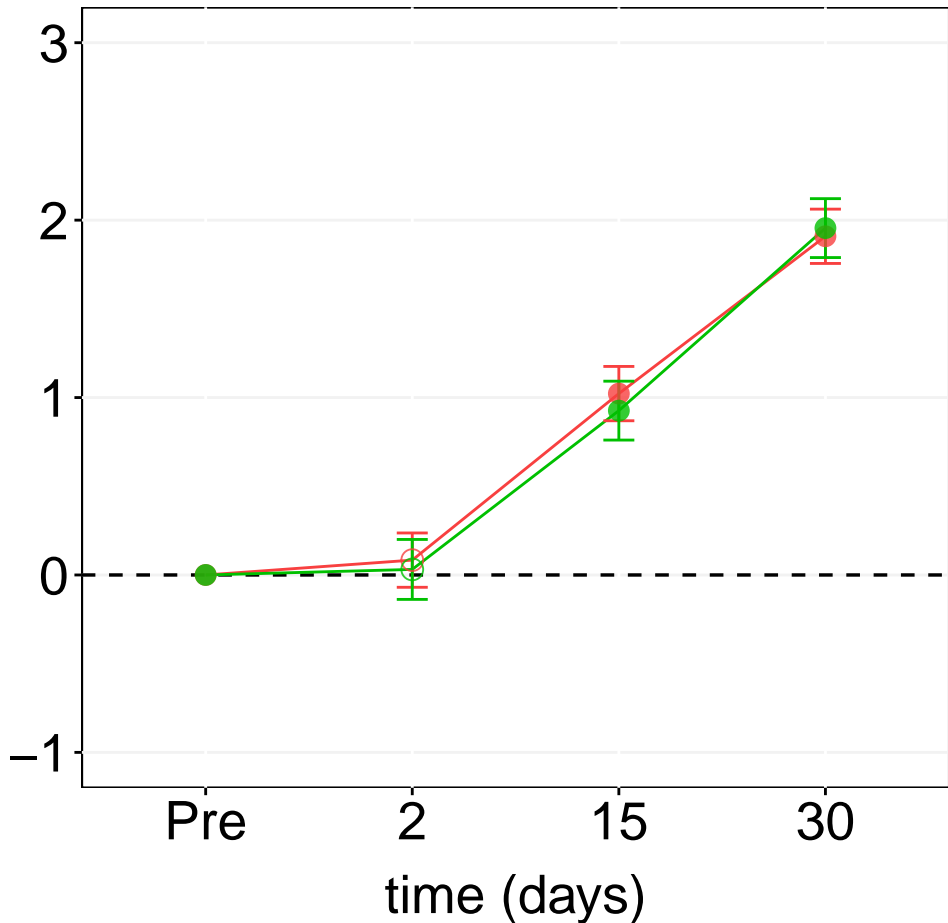

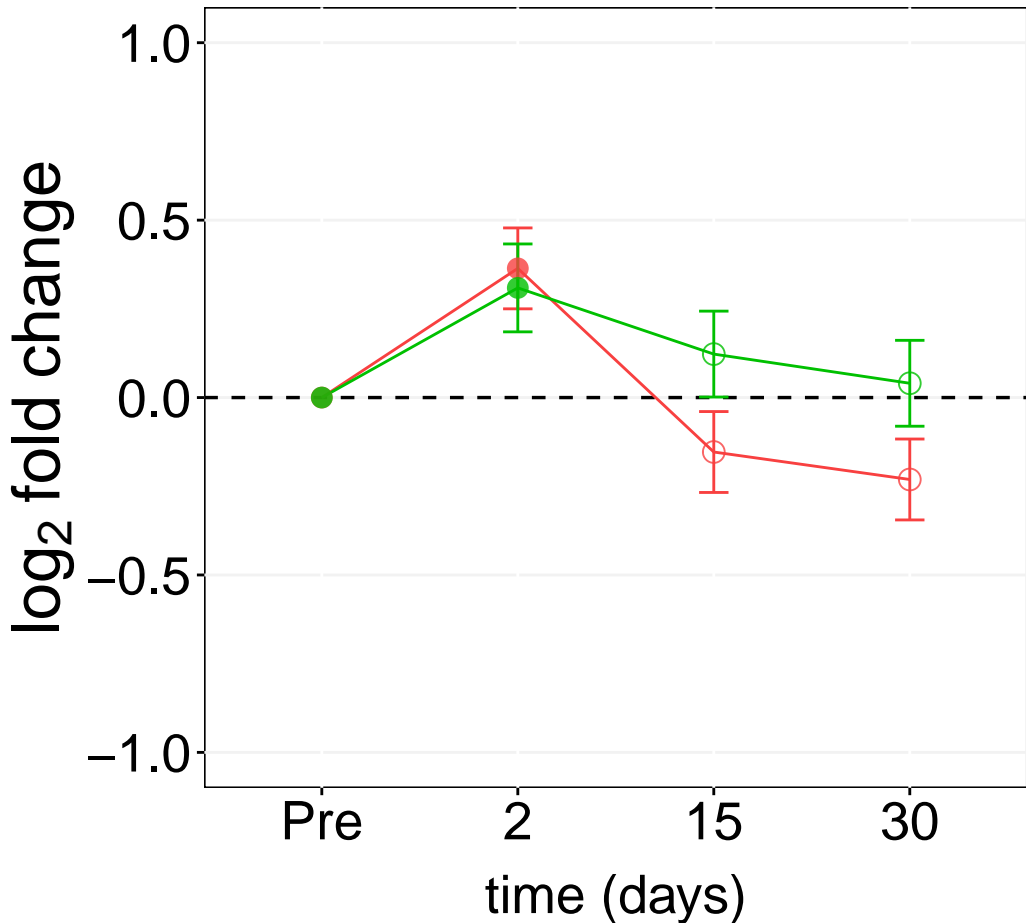



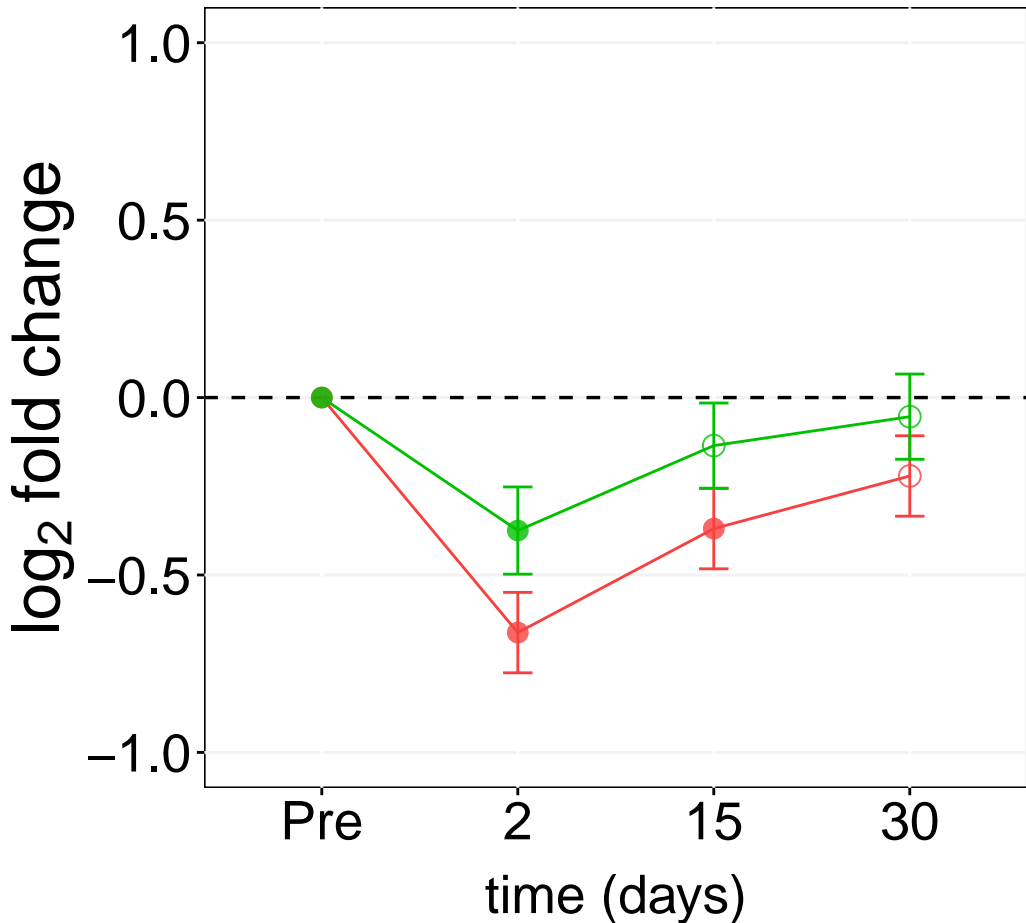

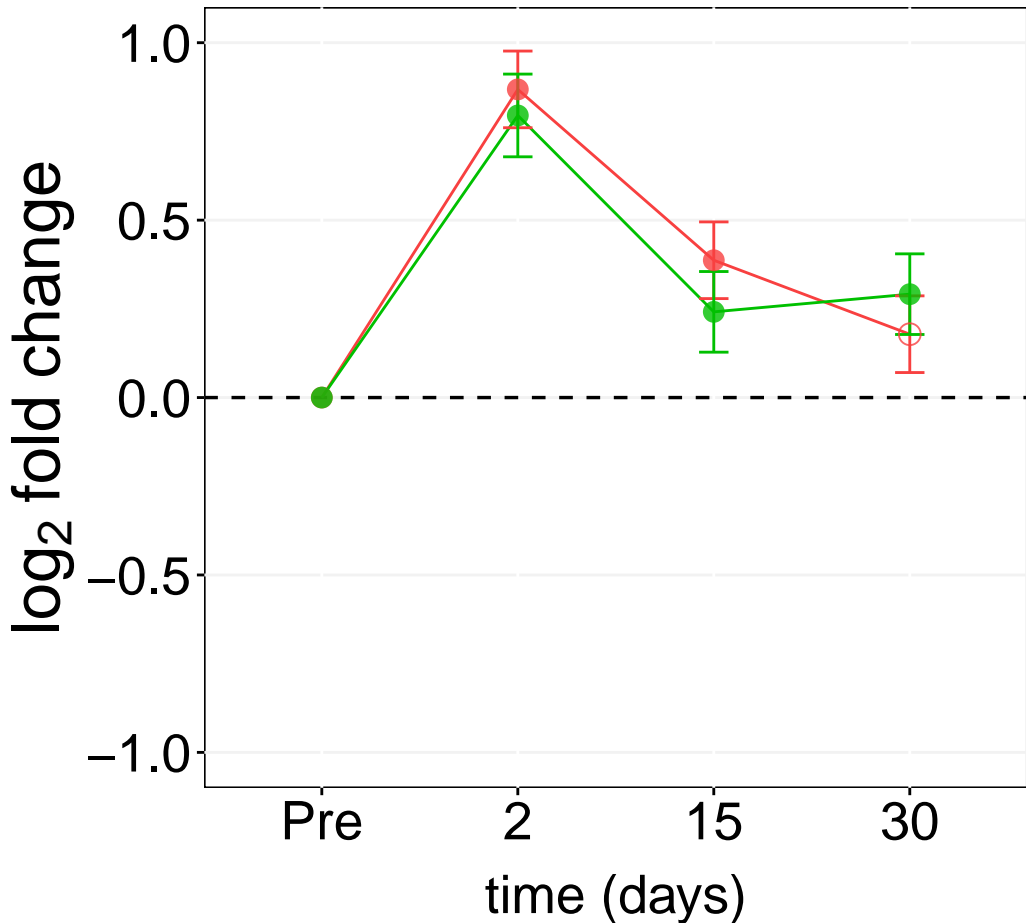

$\log_2$  fold change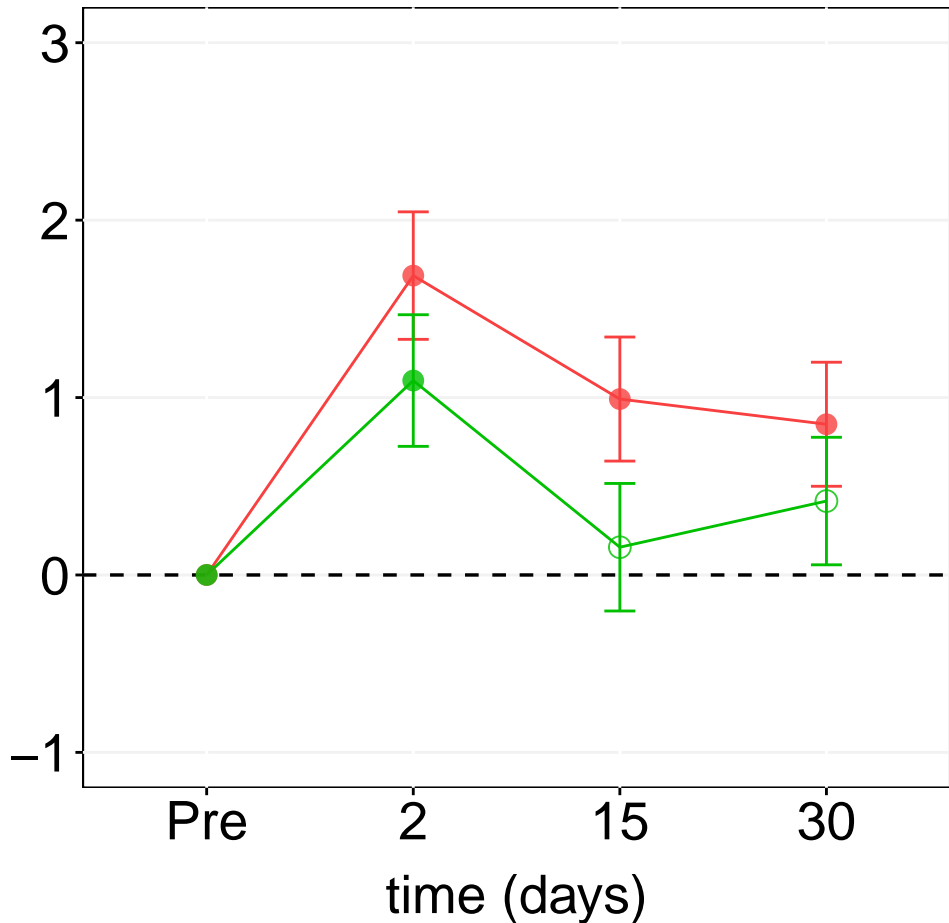

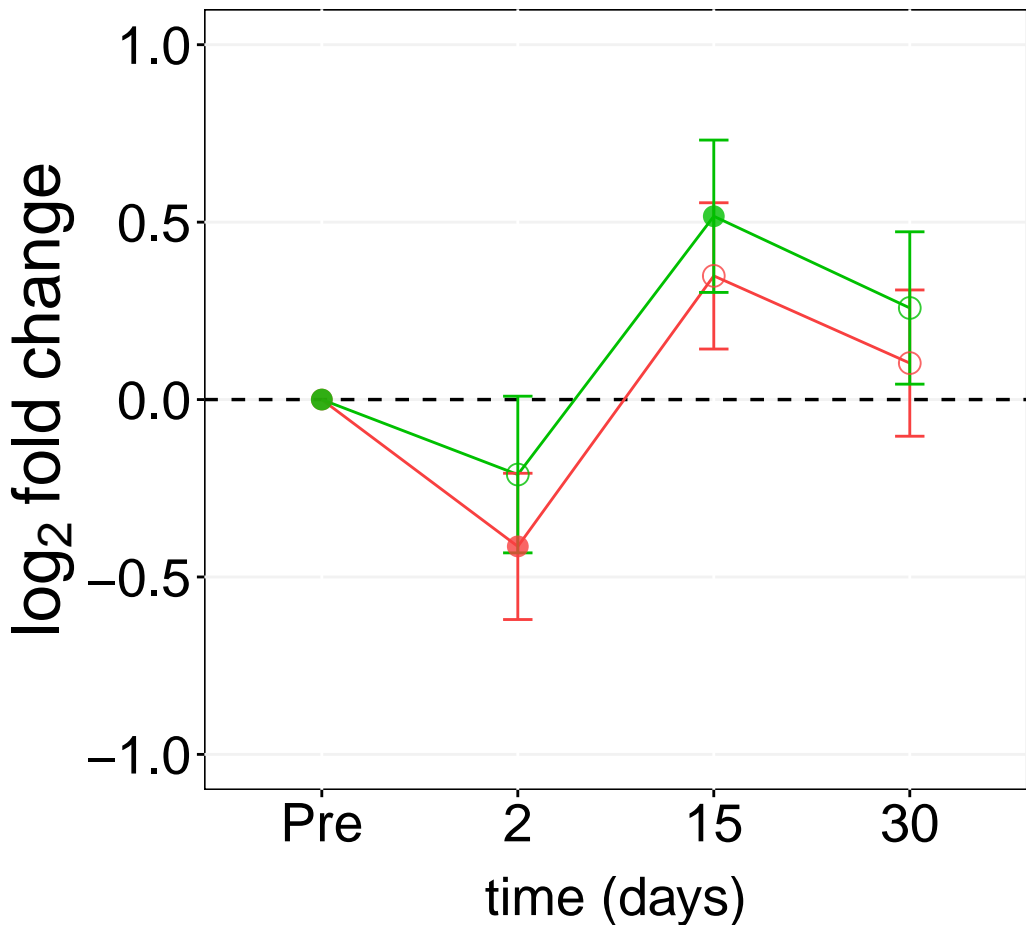

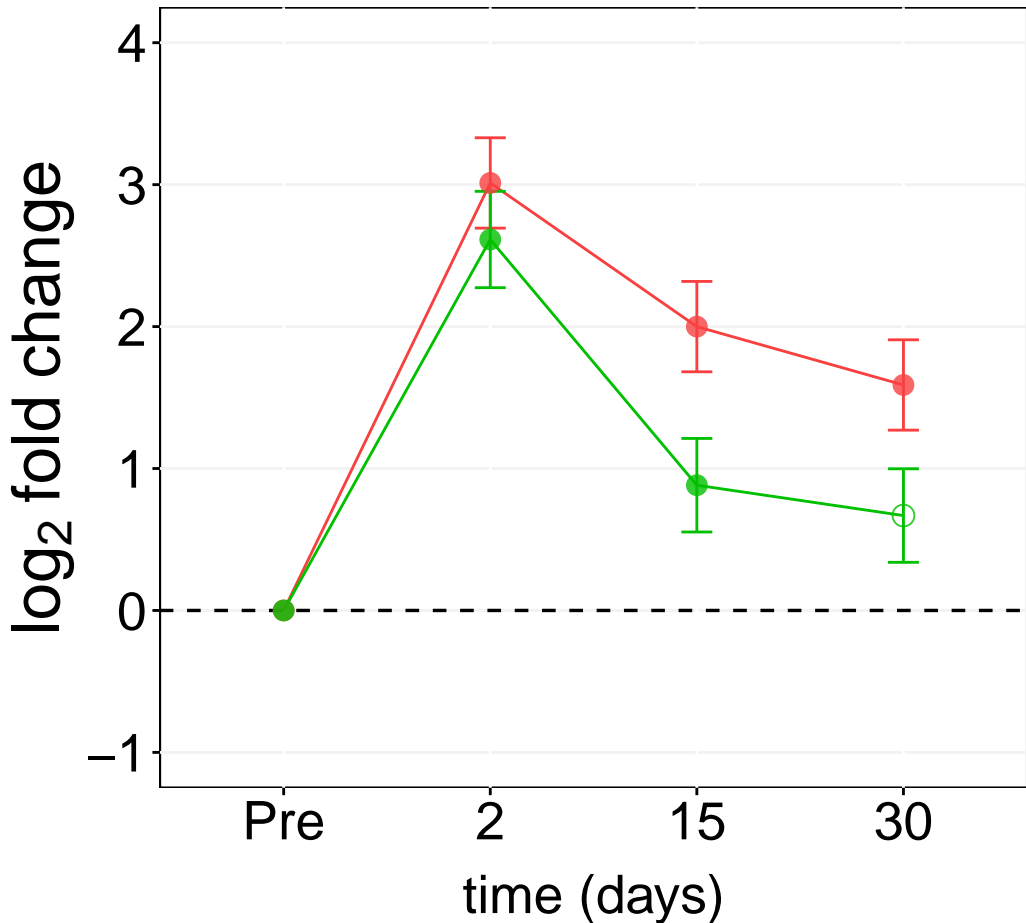

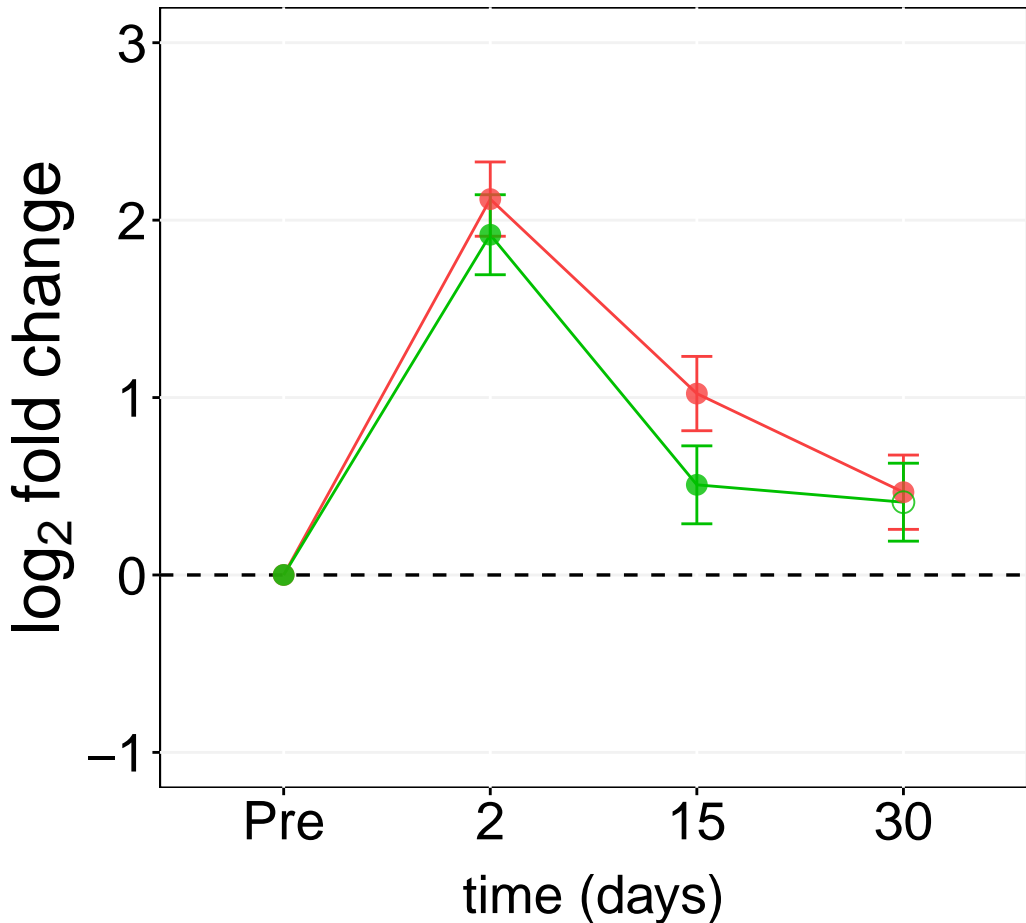

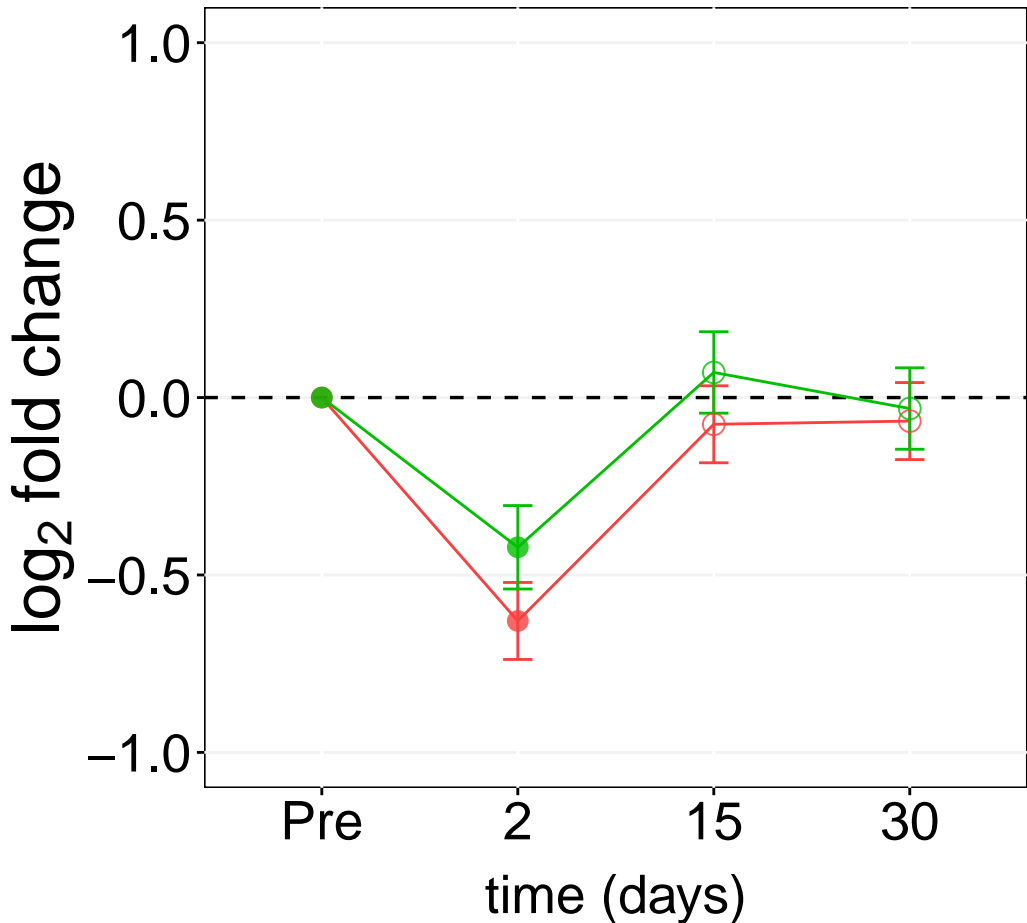

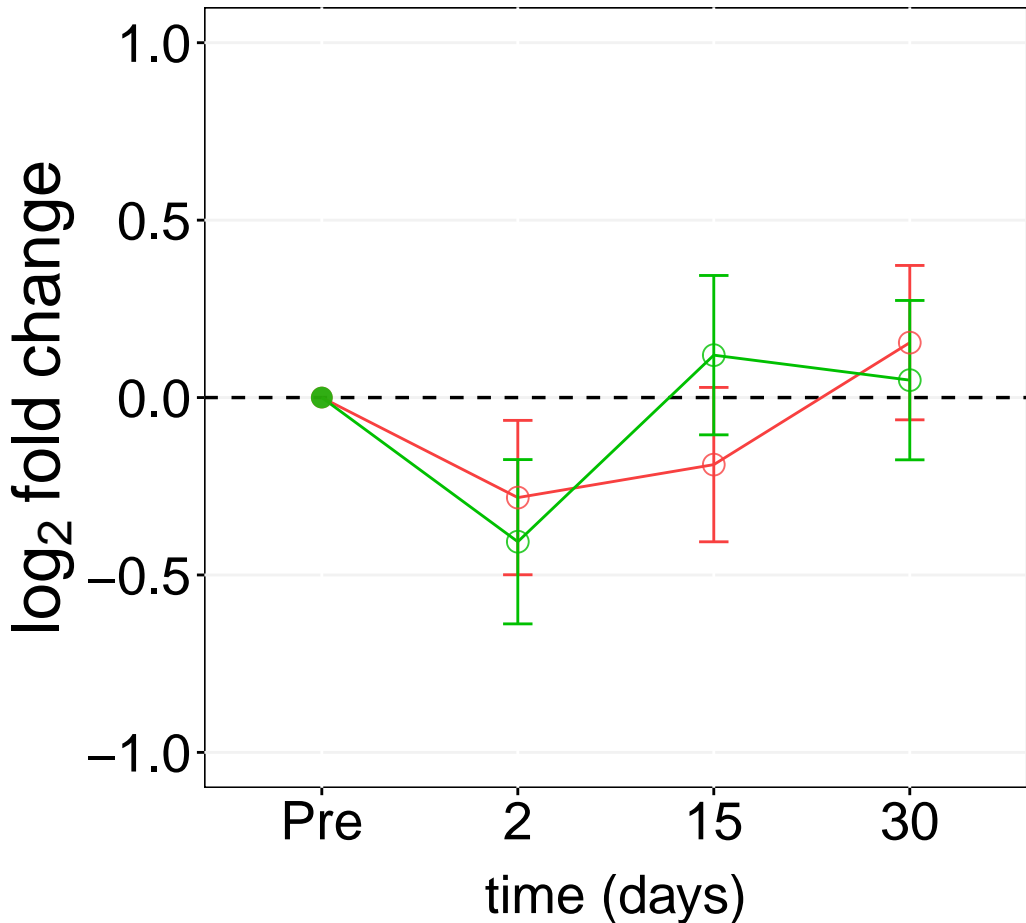



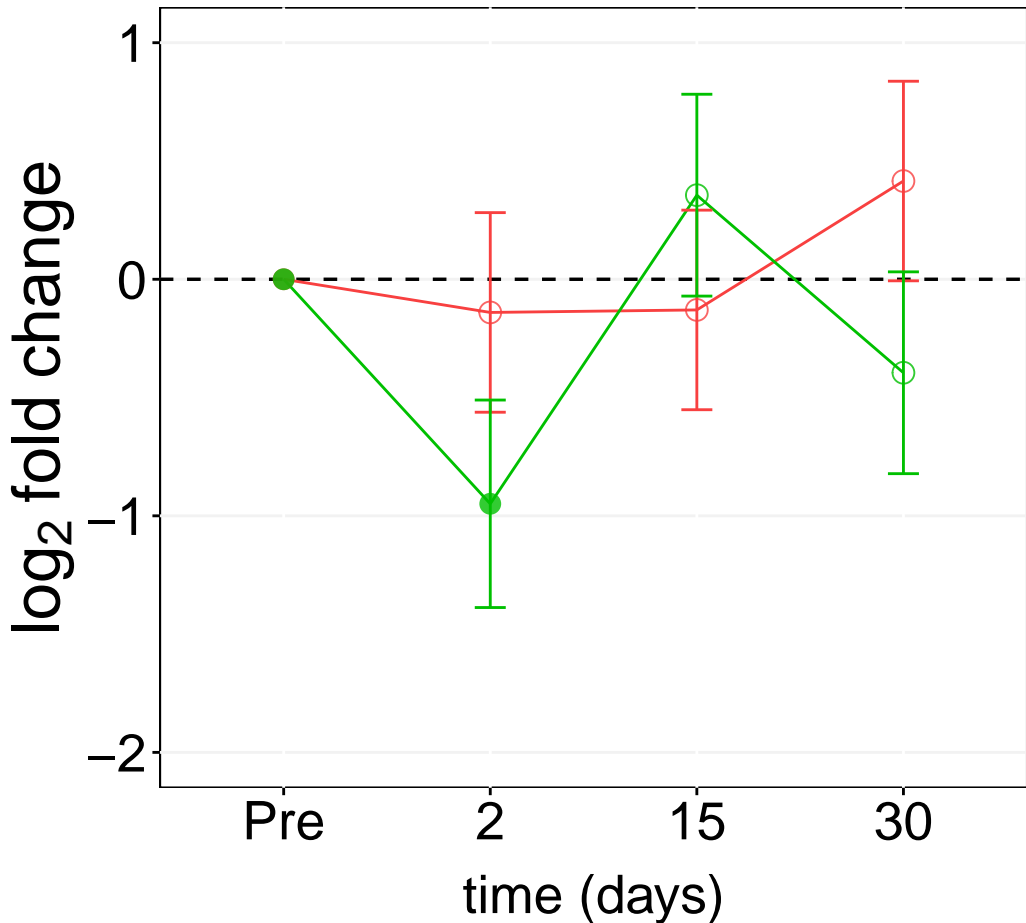

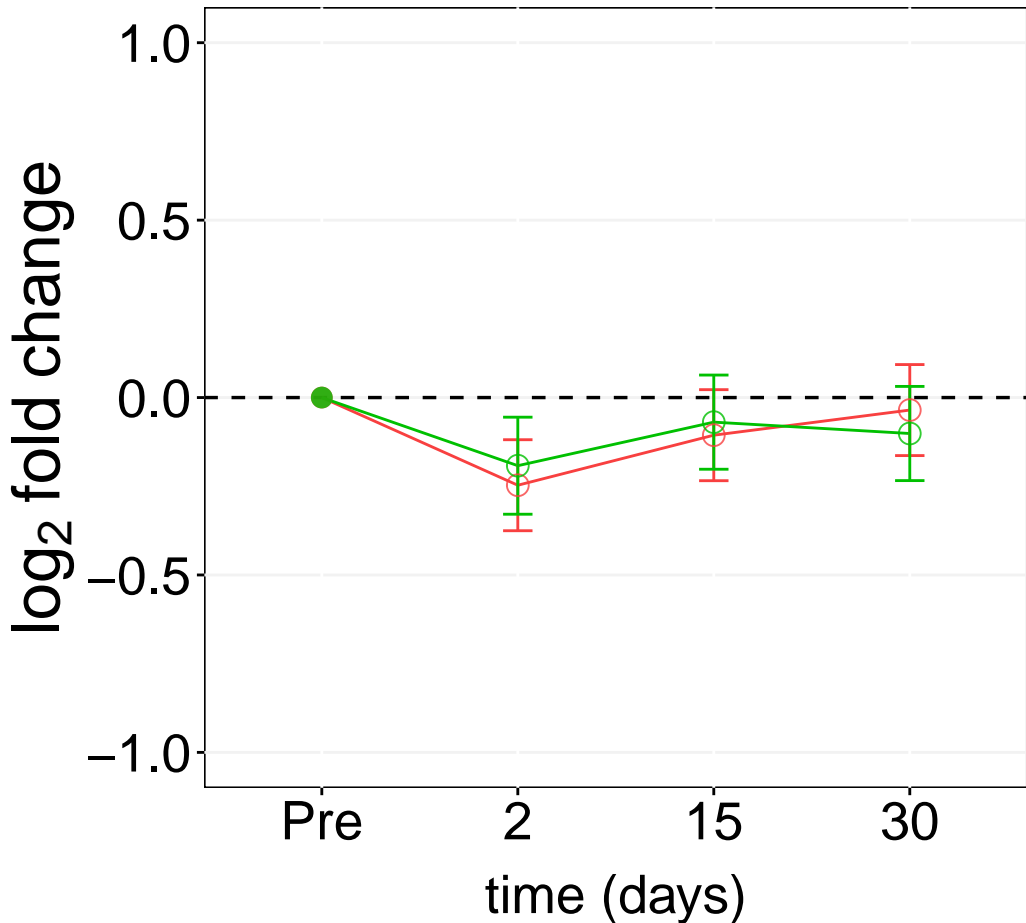

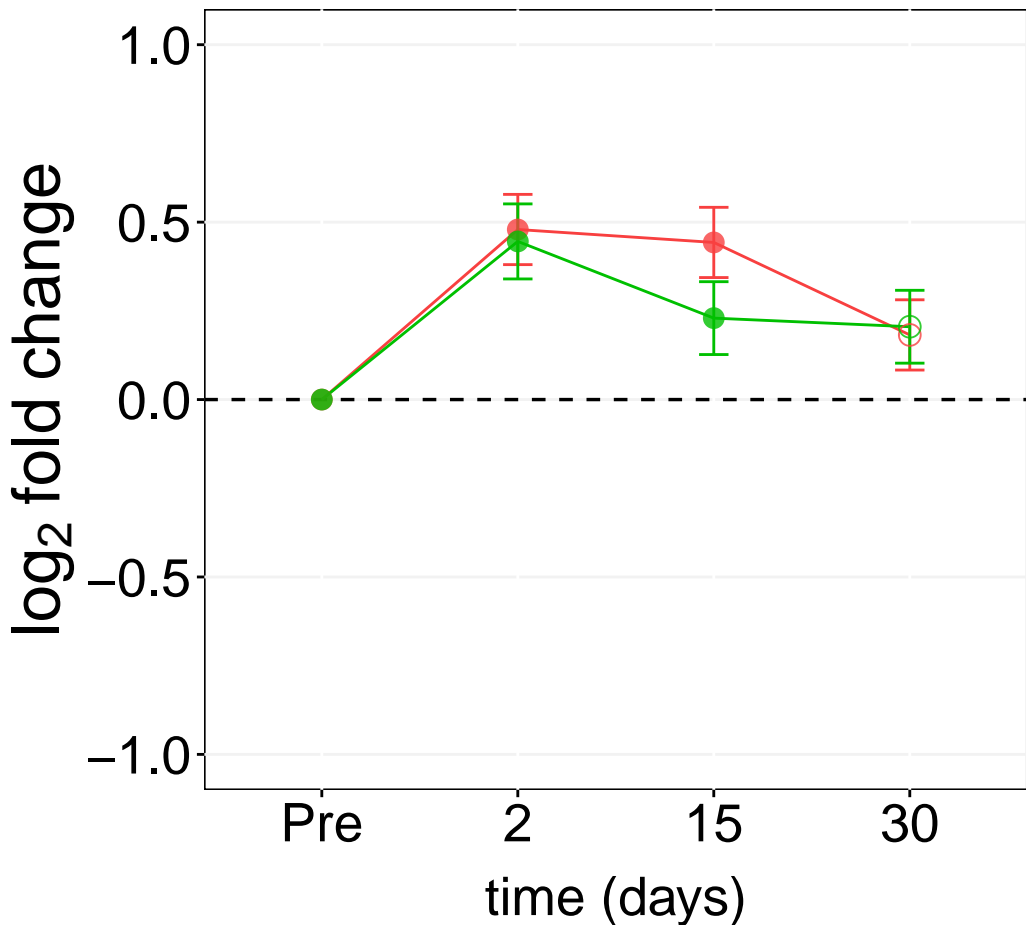

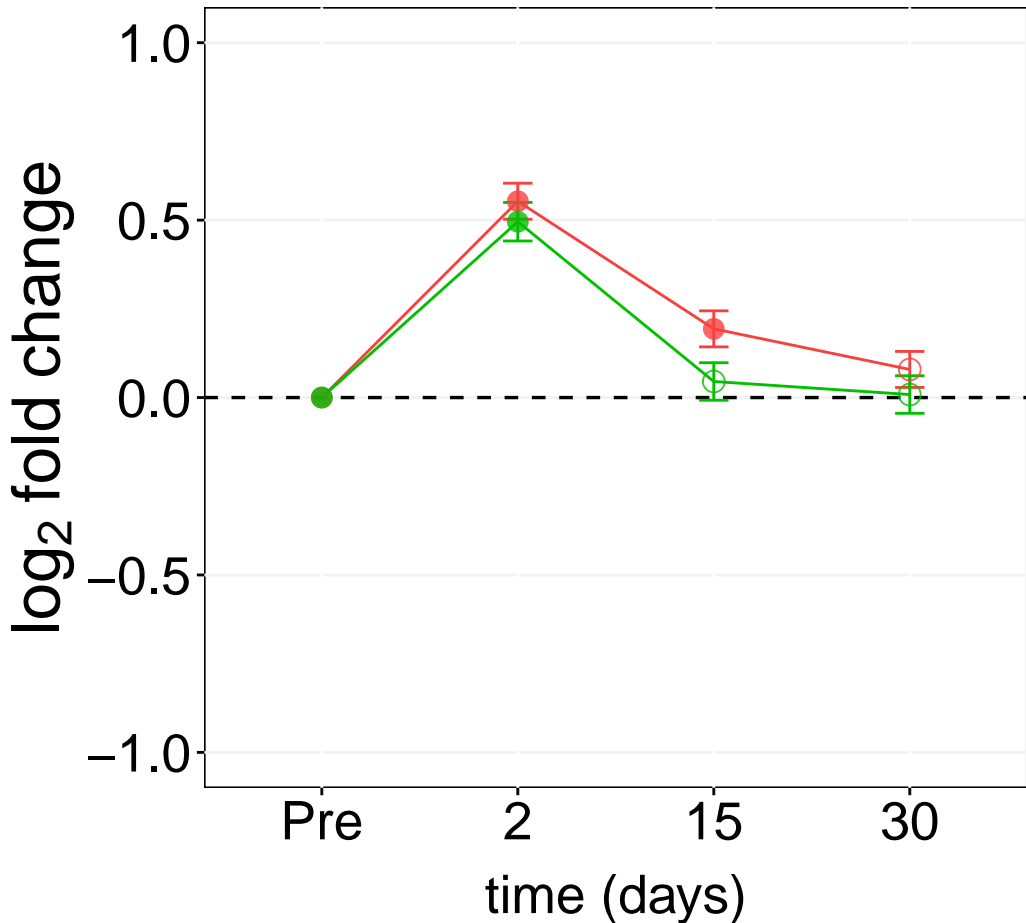

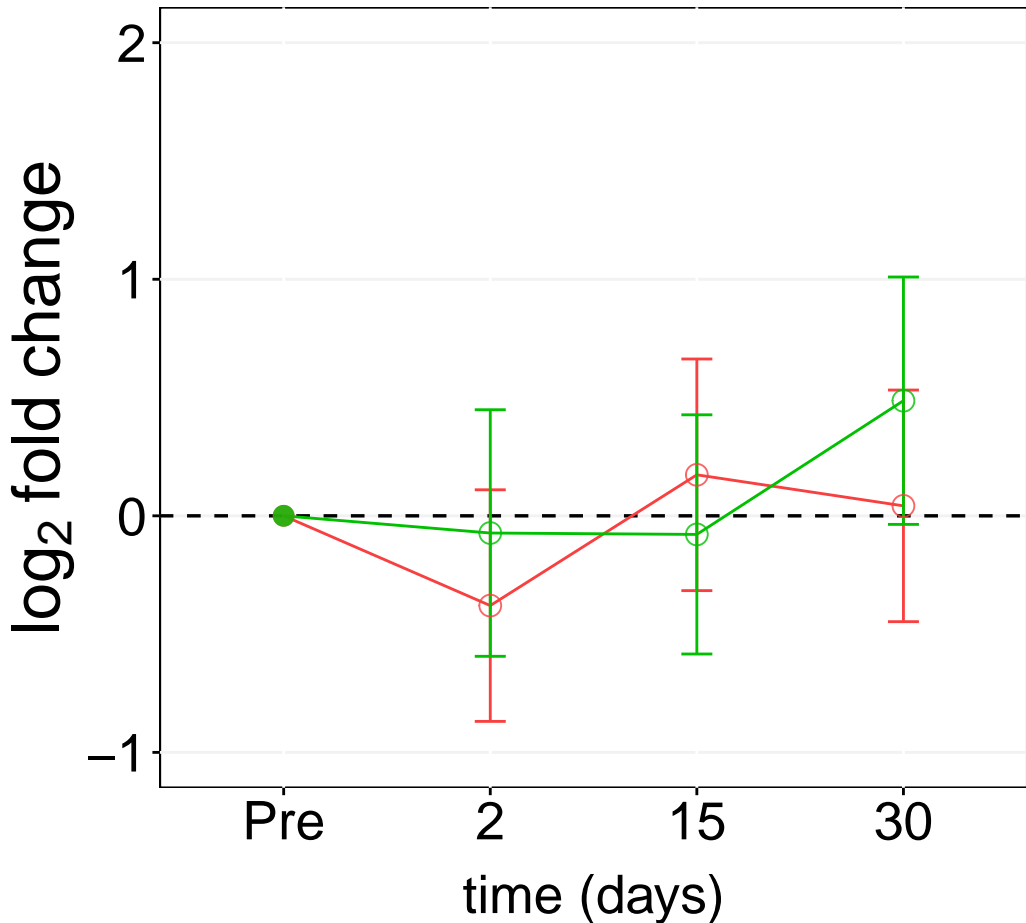

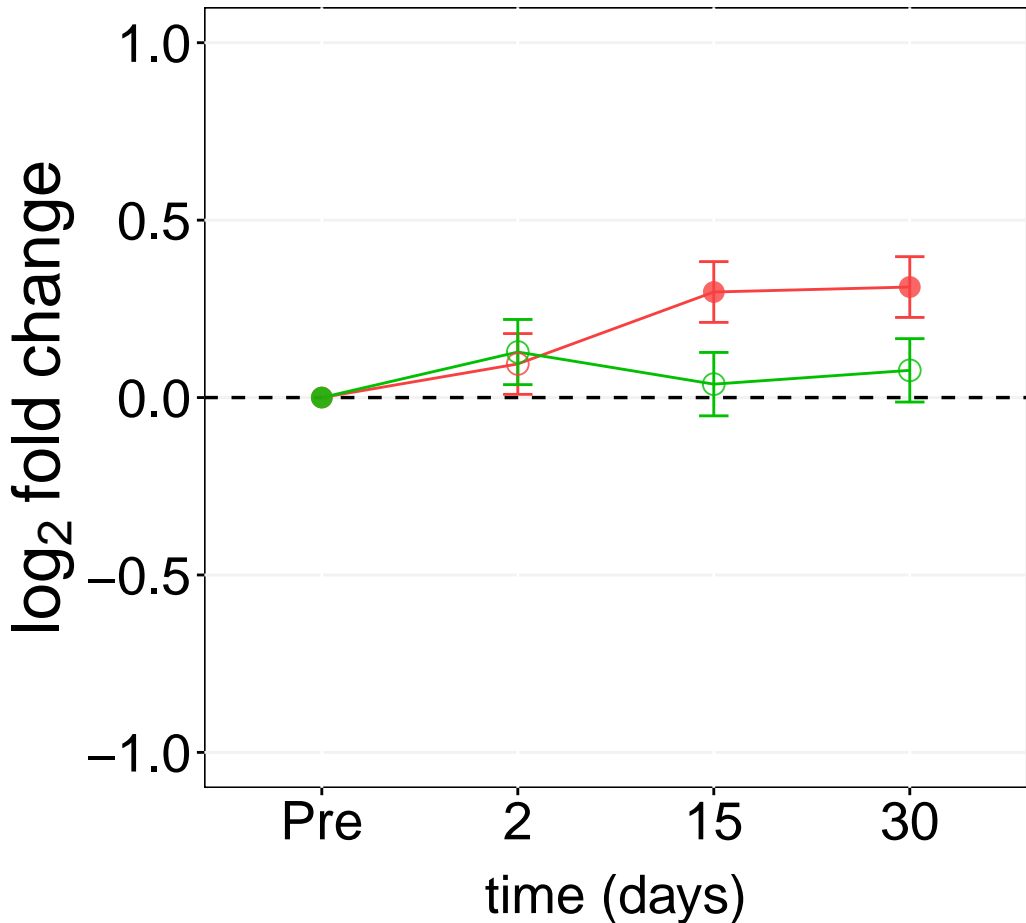

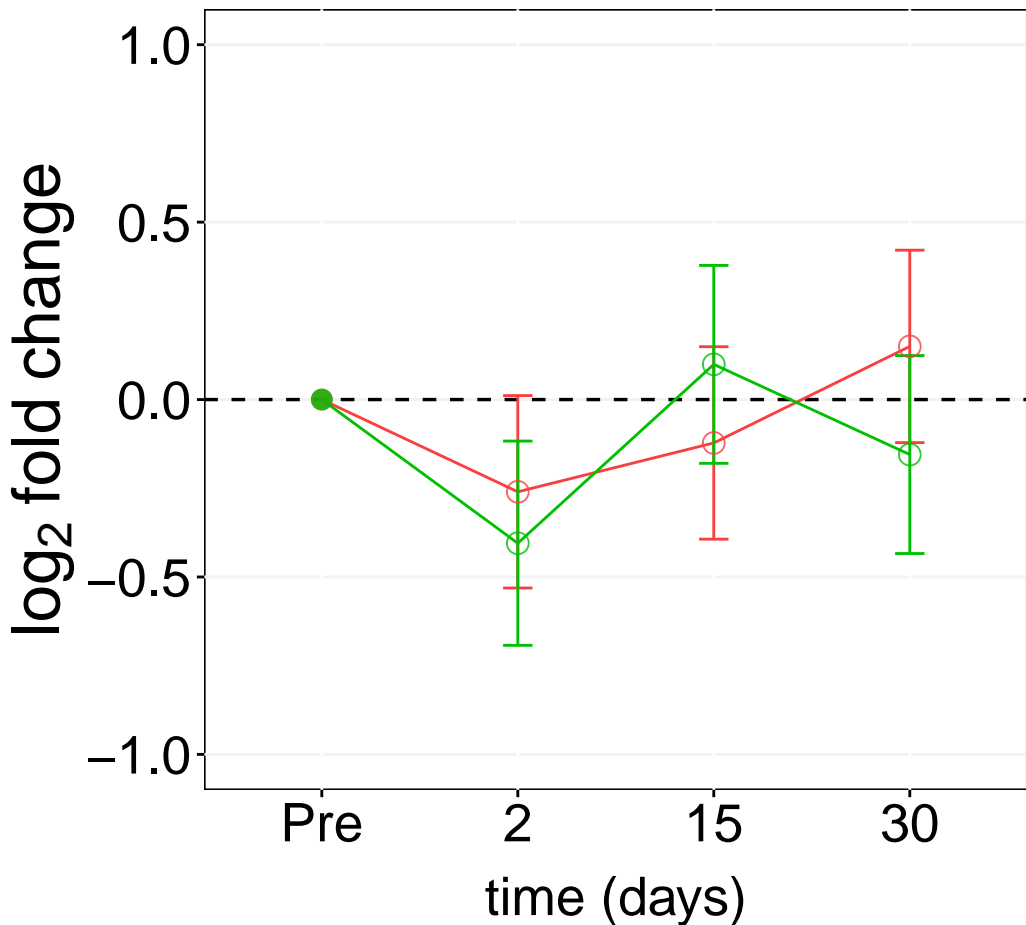

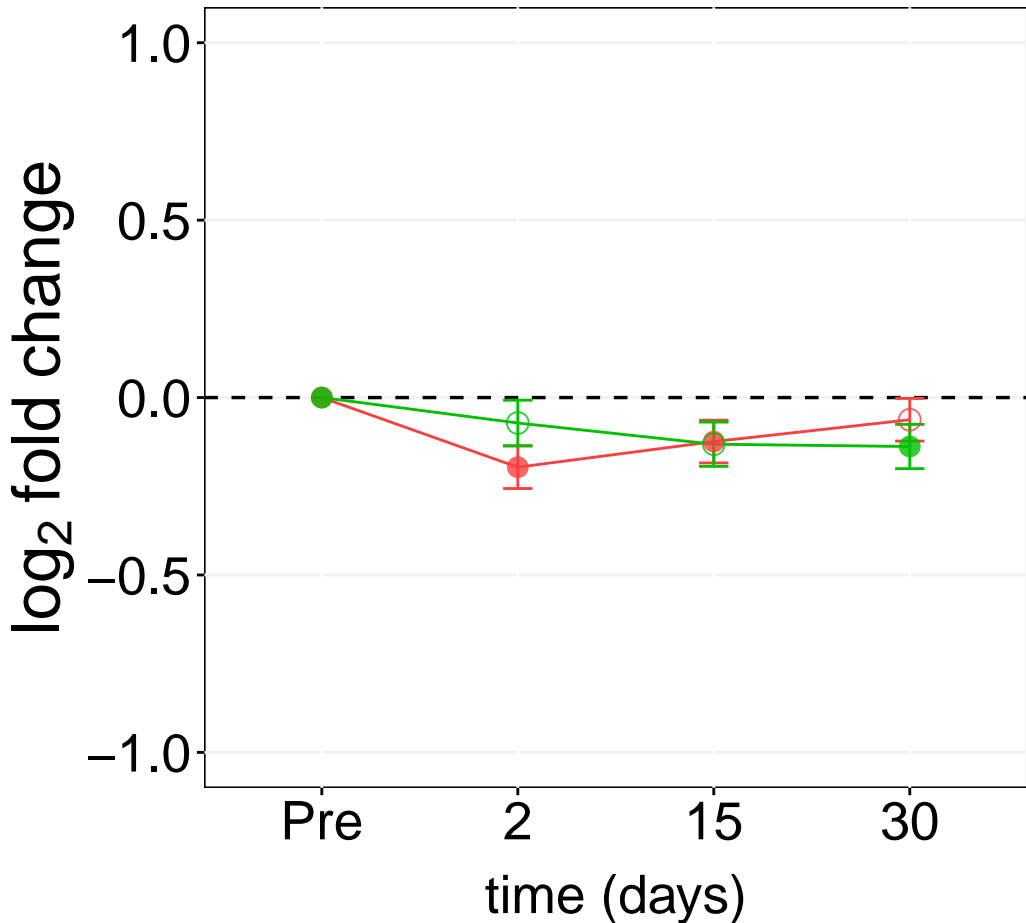



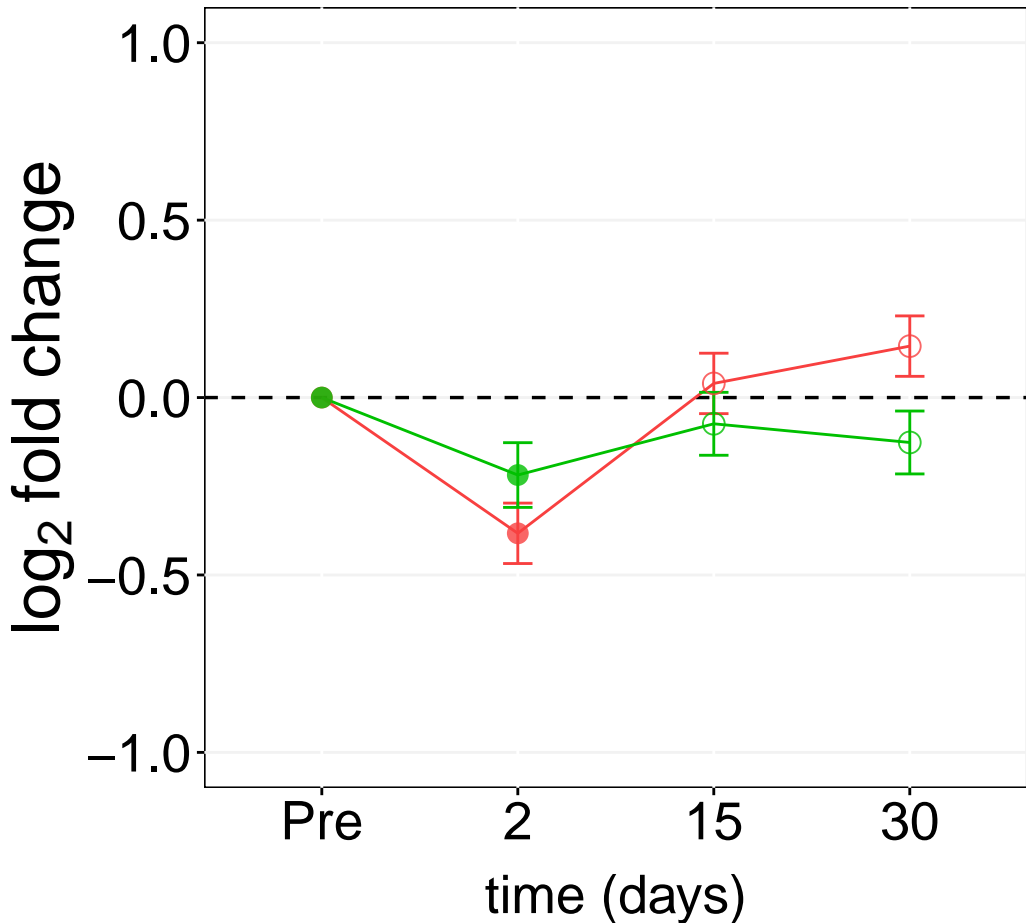

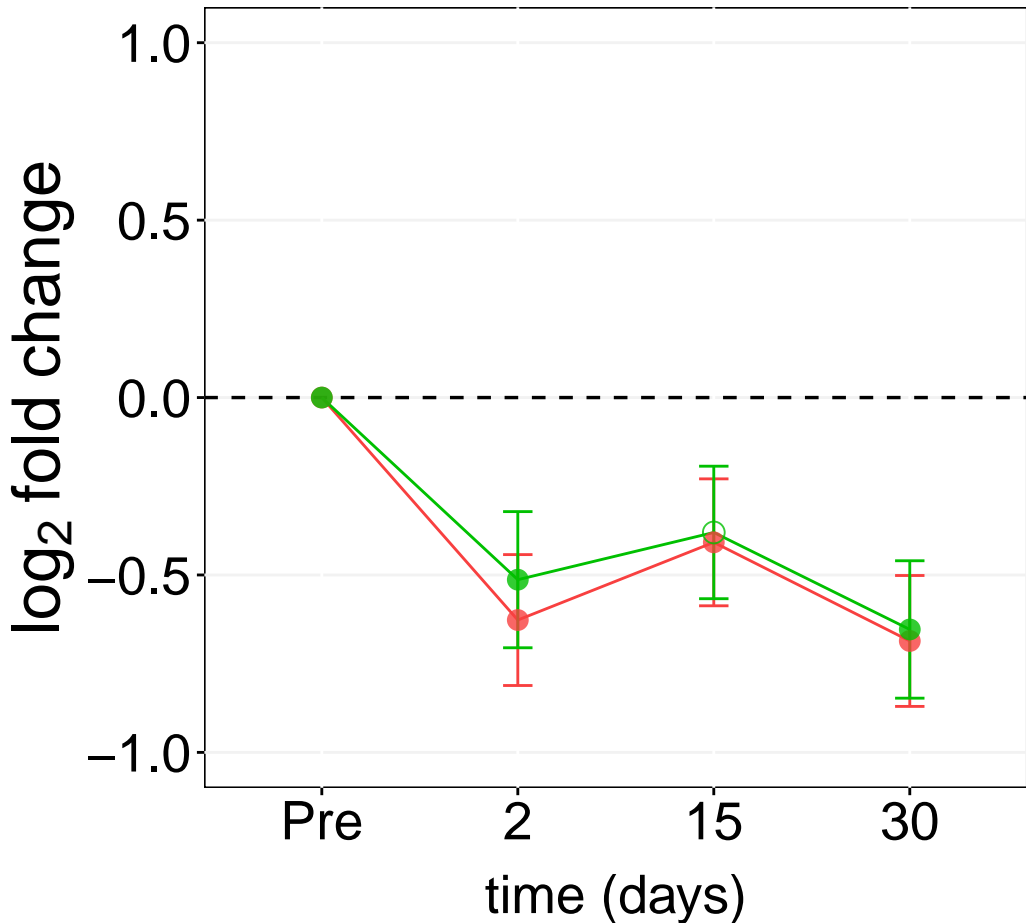

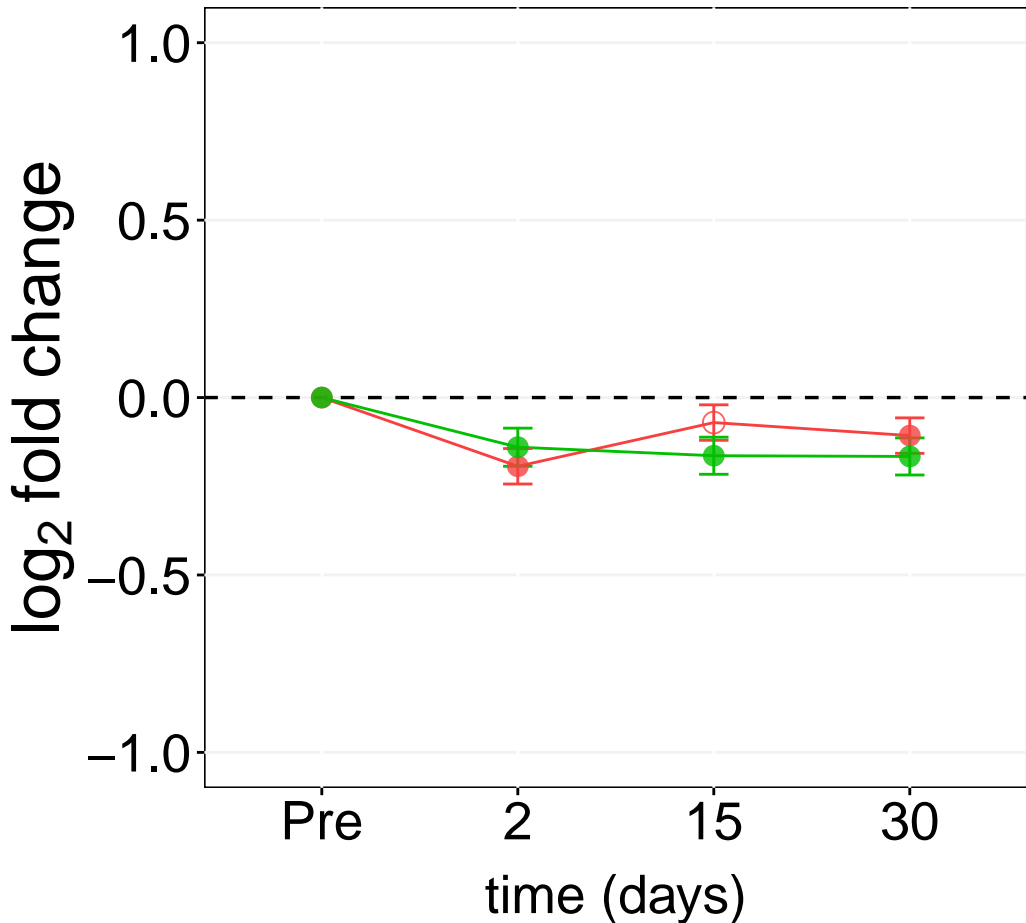

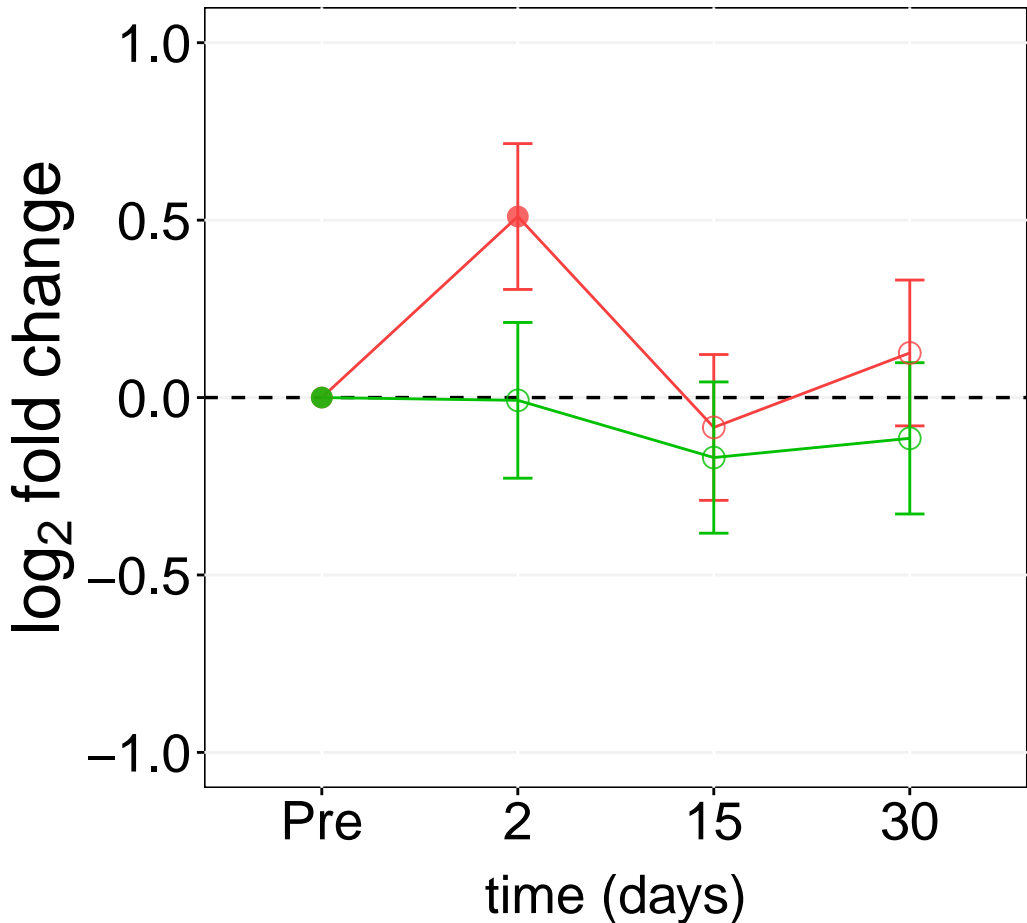

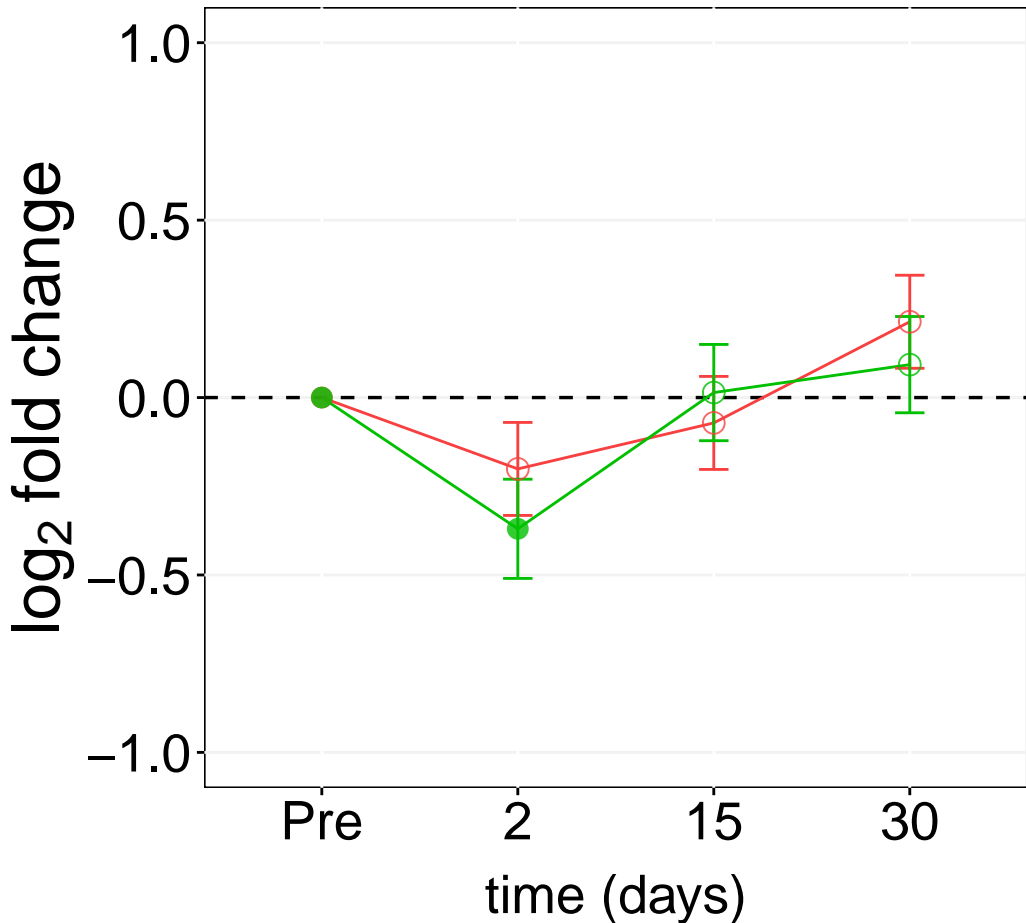

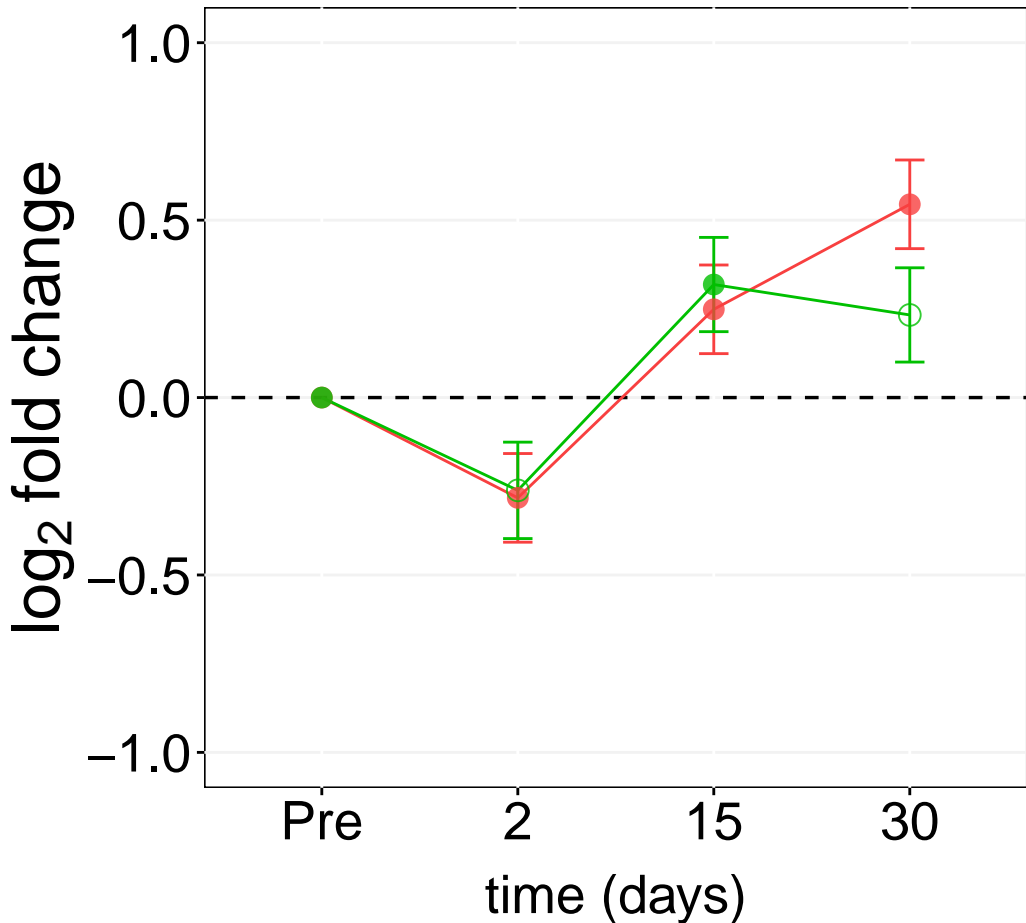

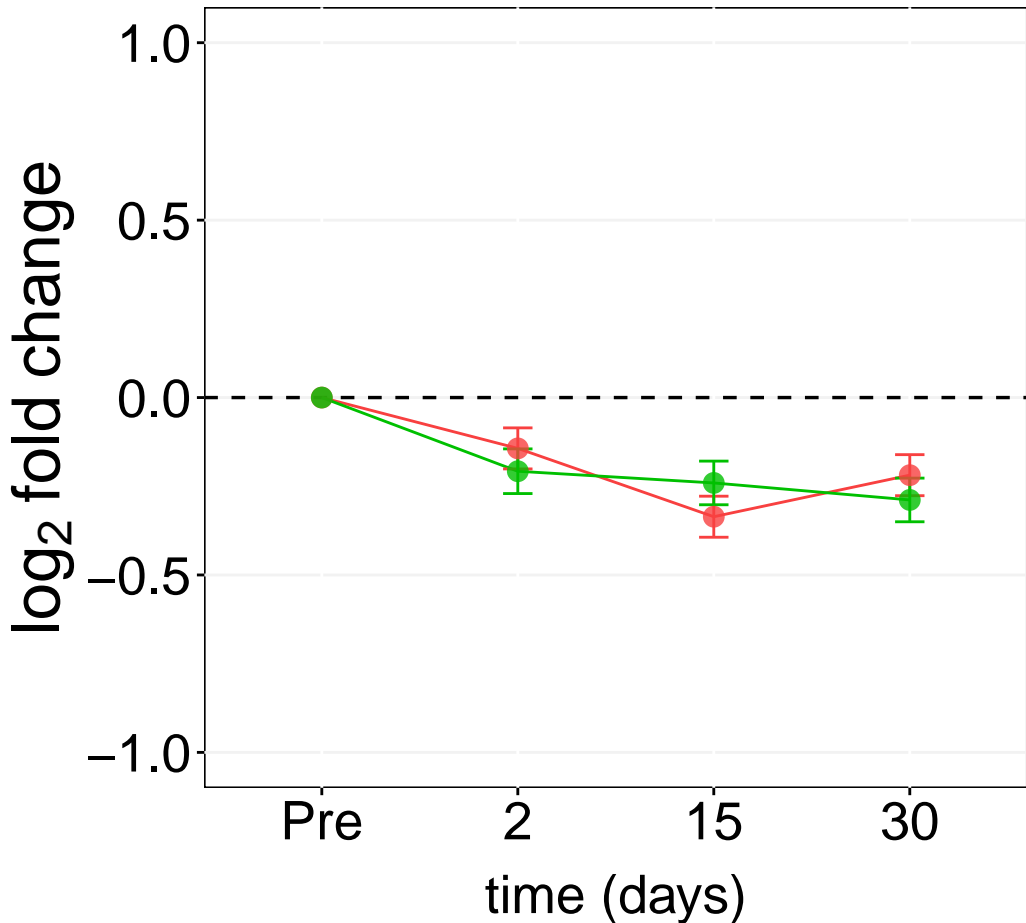

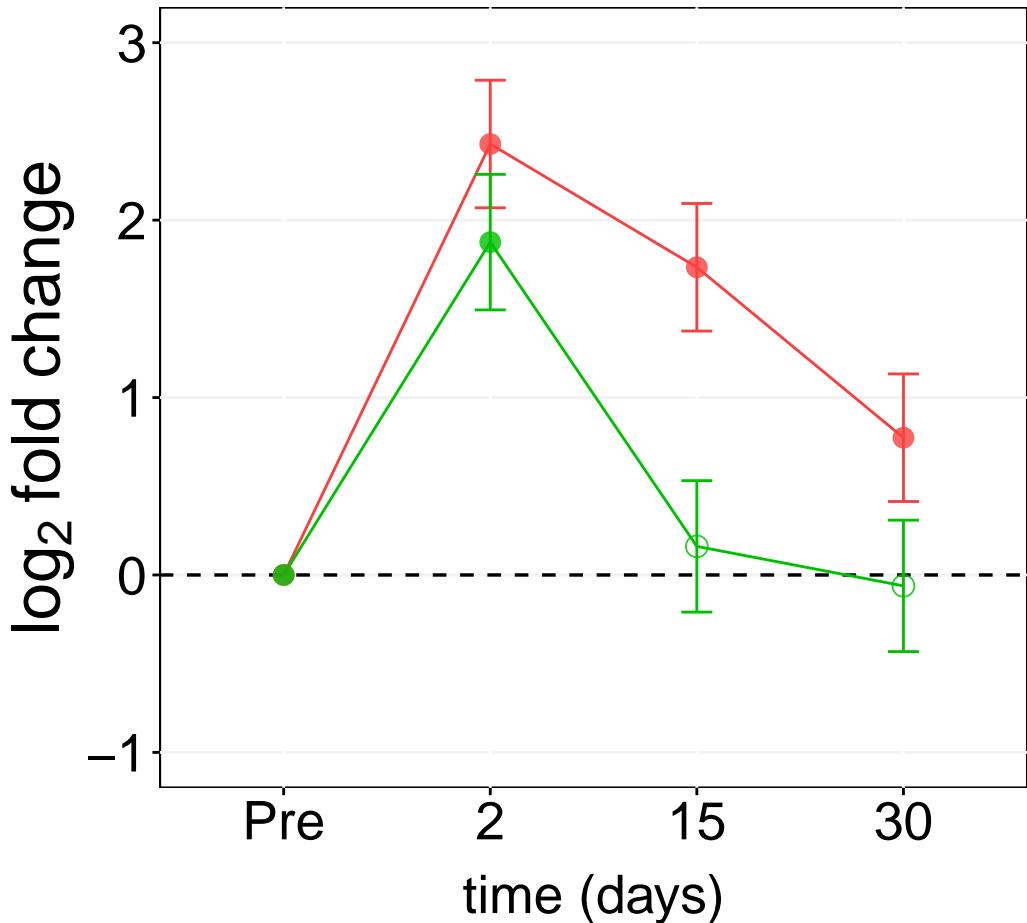



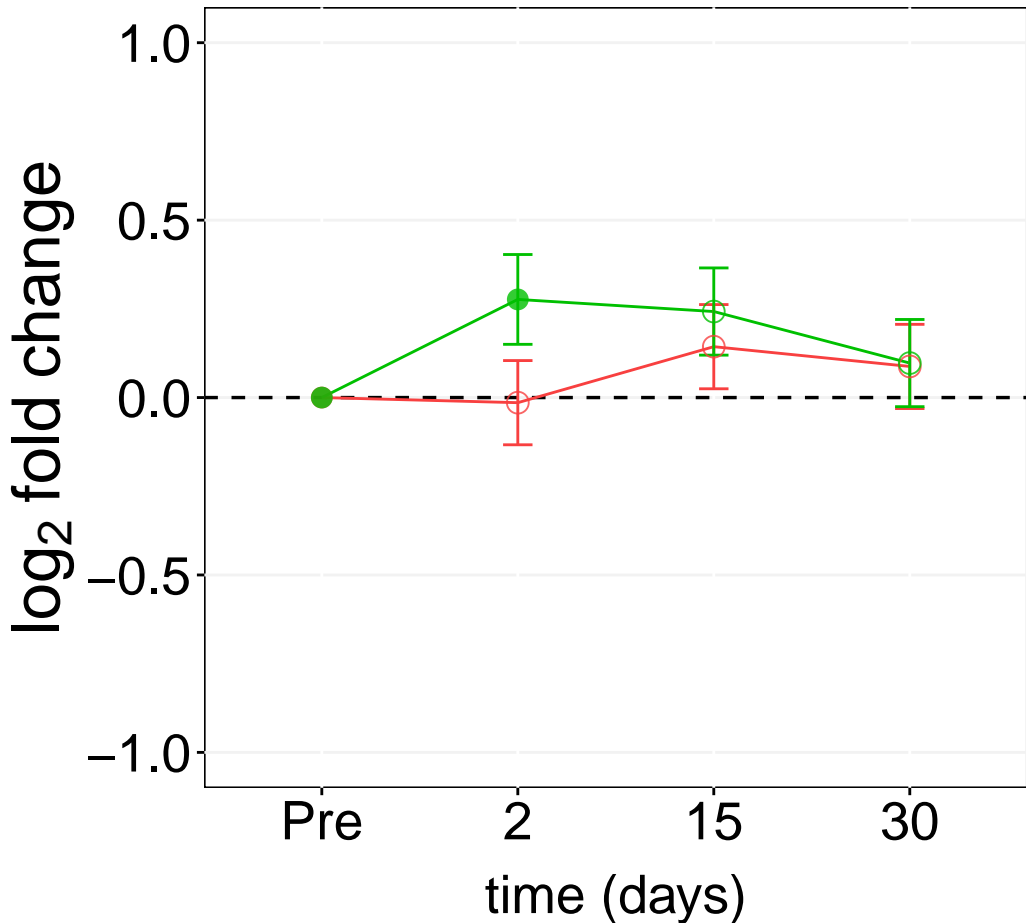

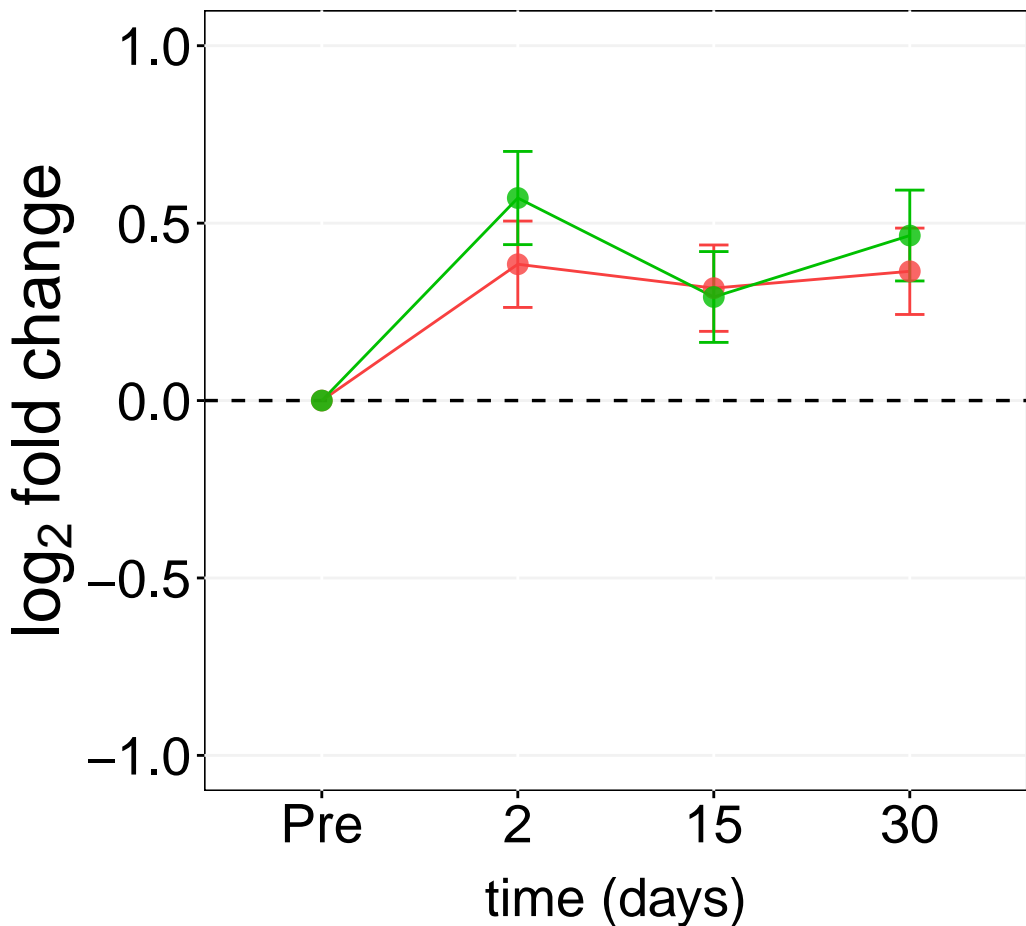

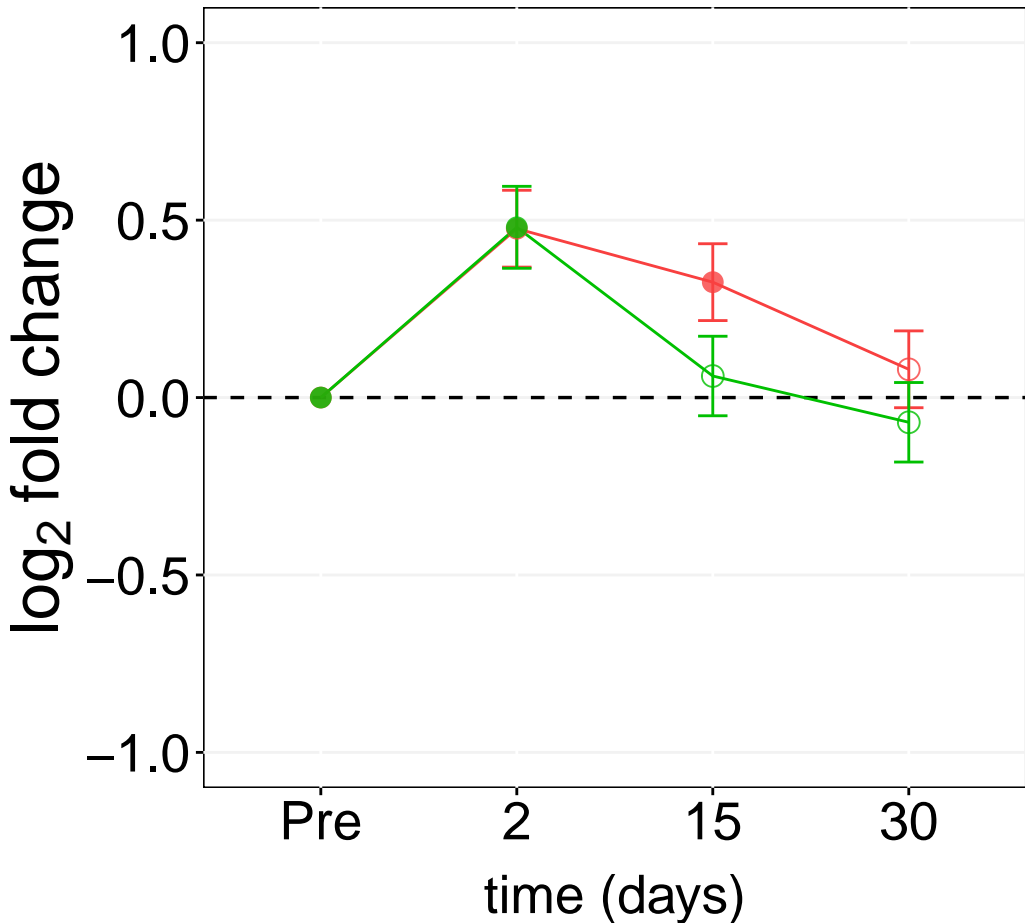

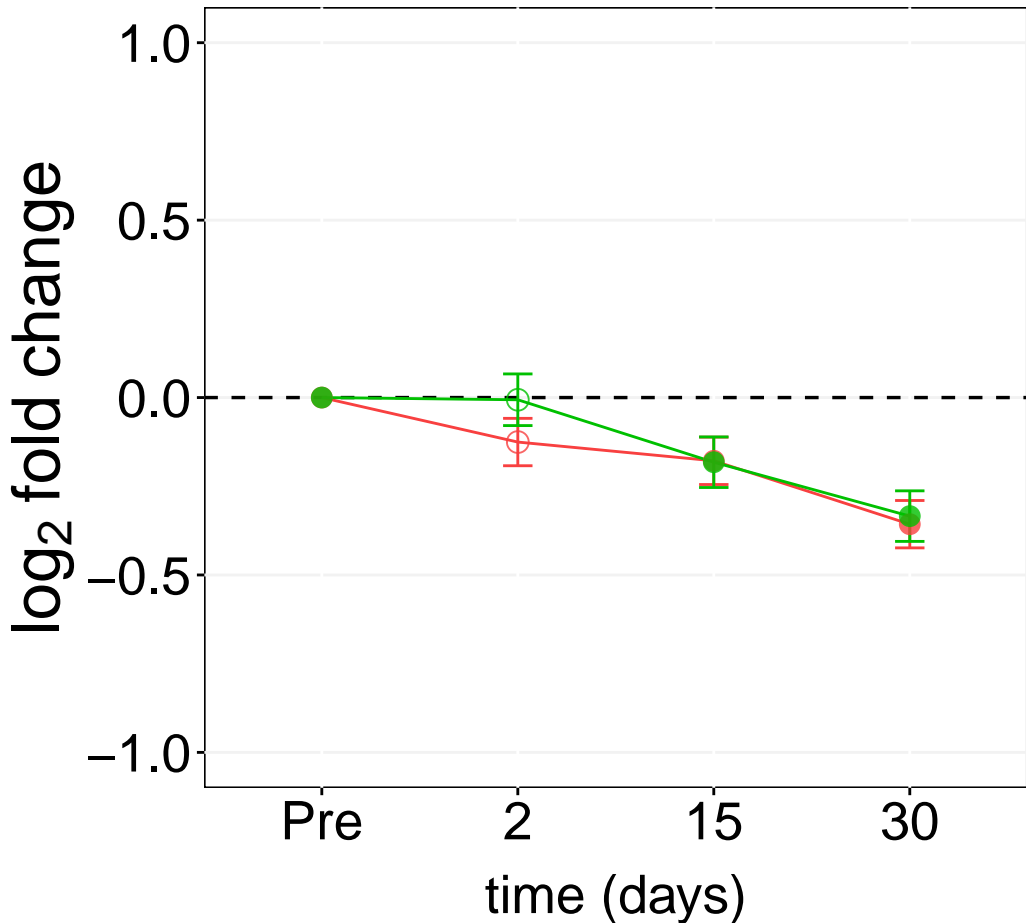

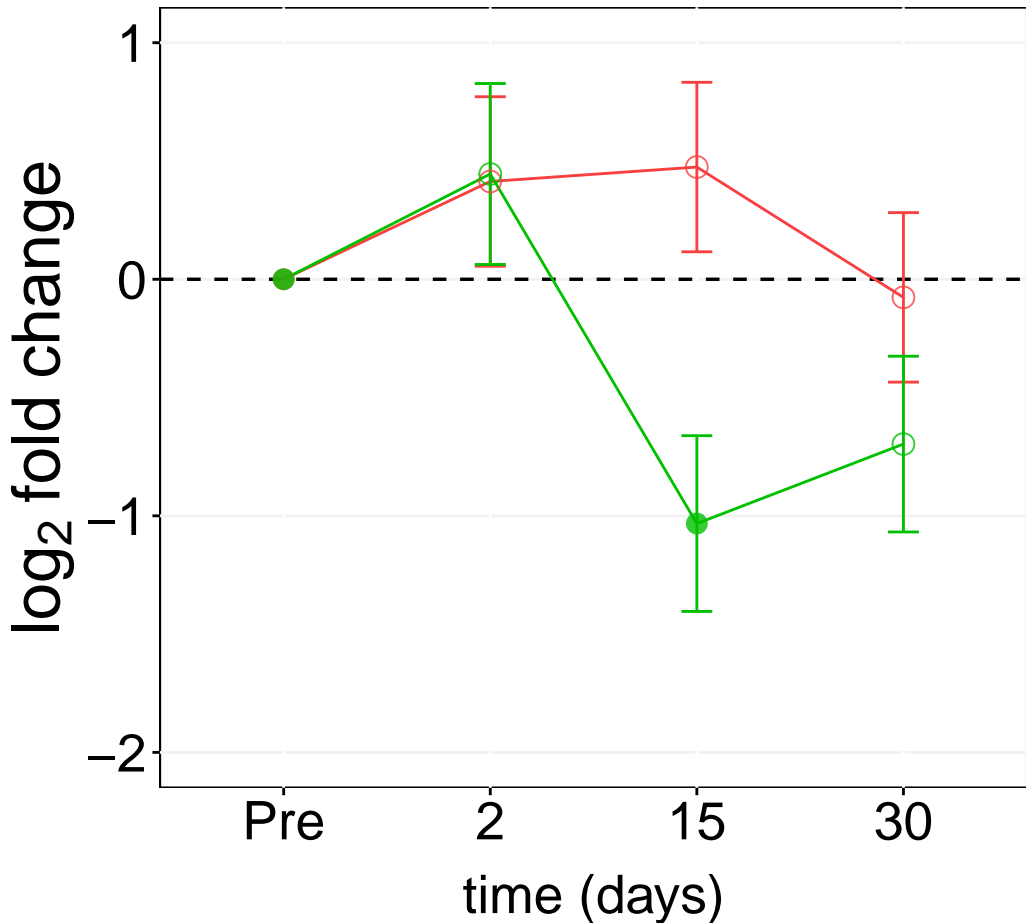

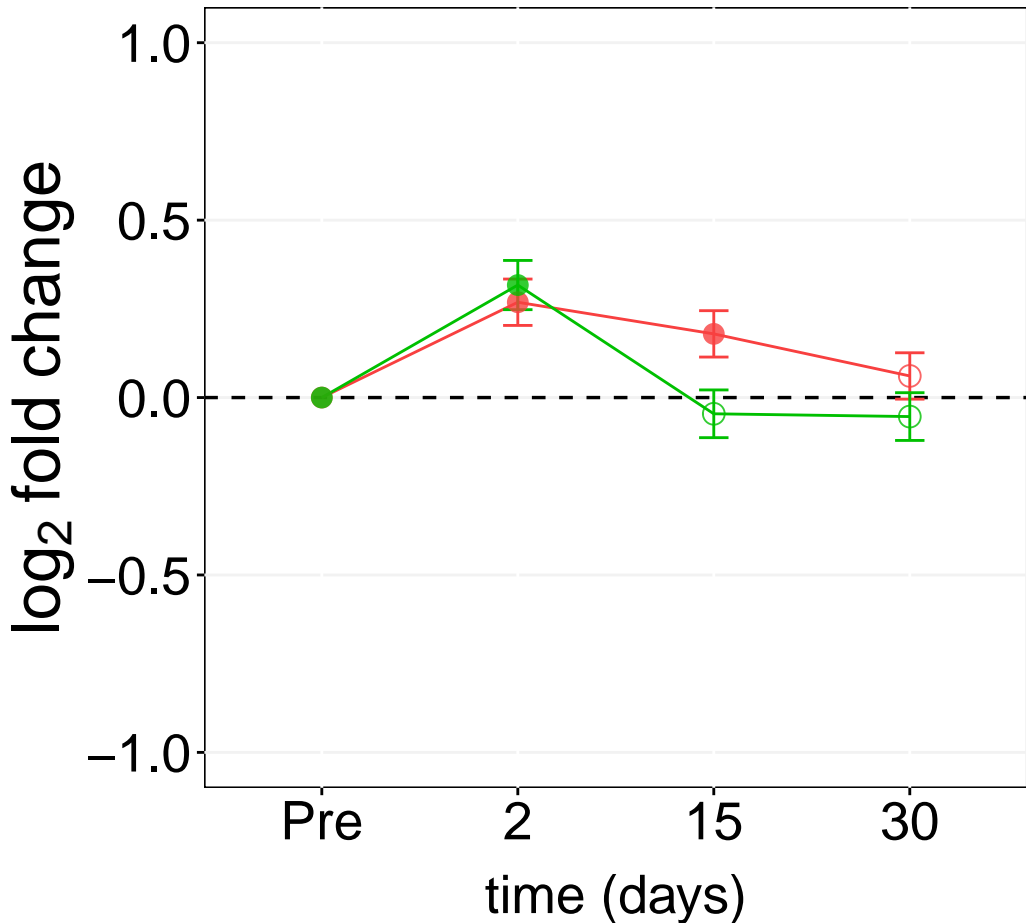

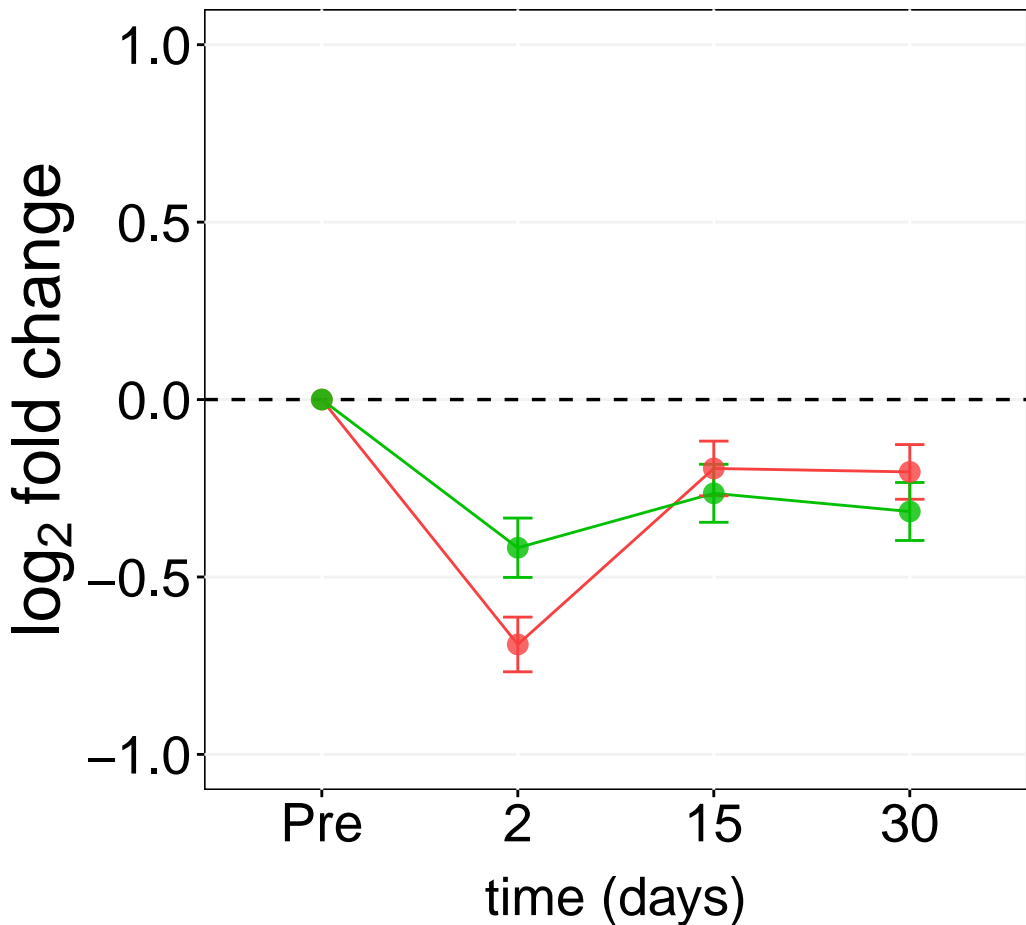

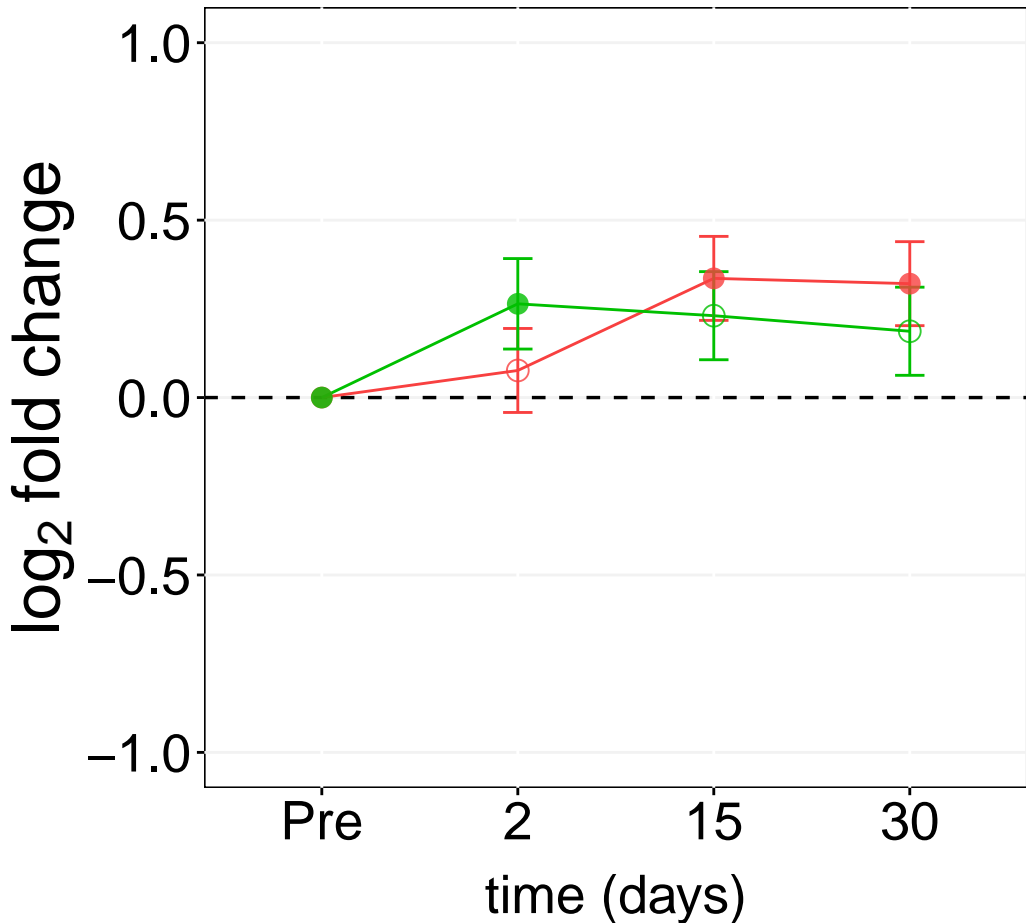



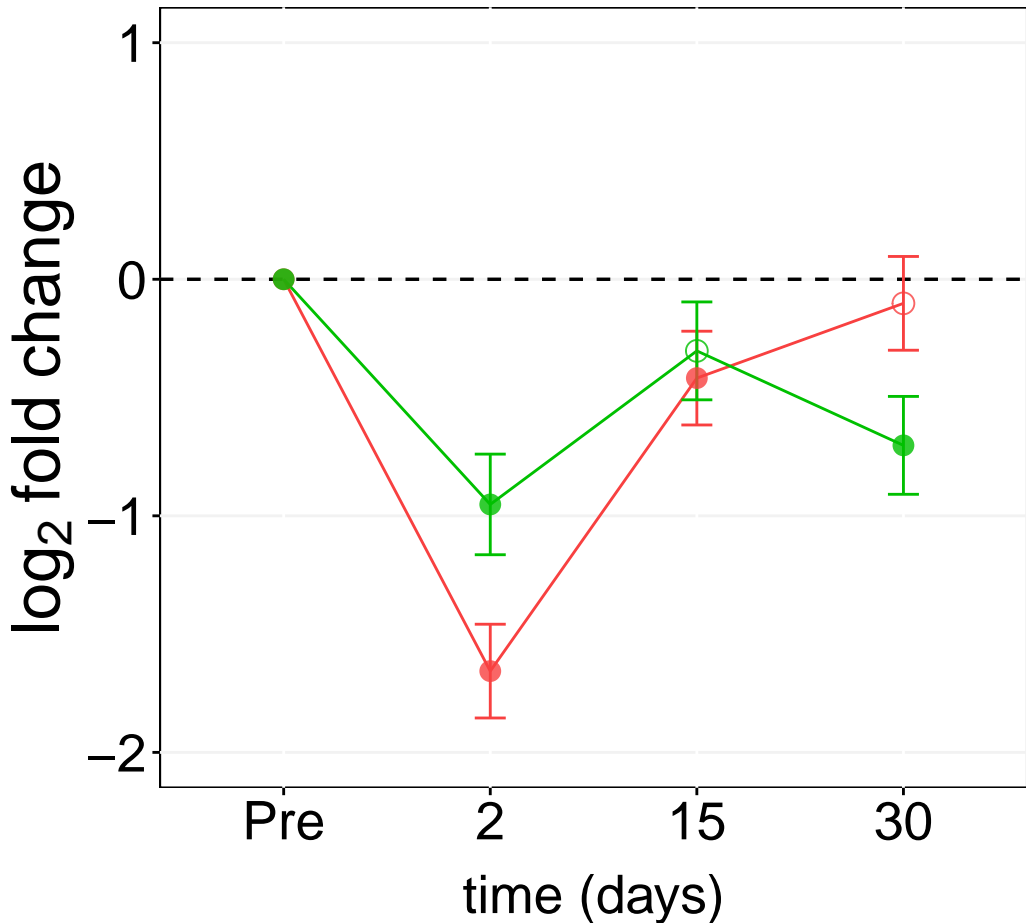

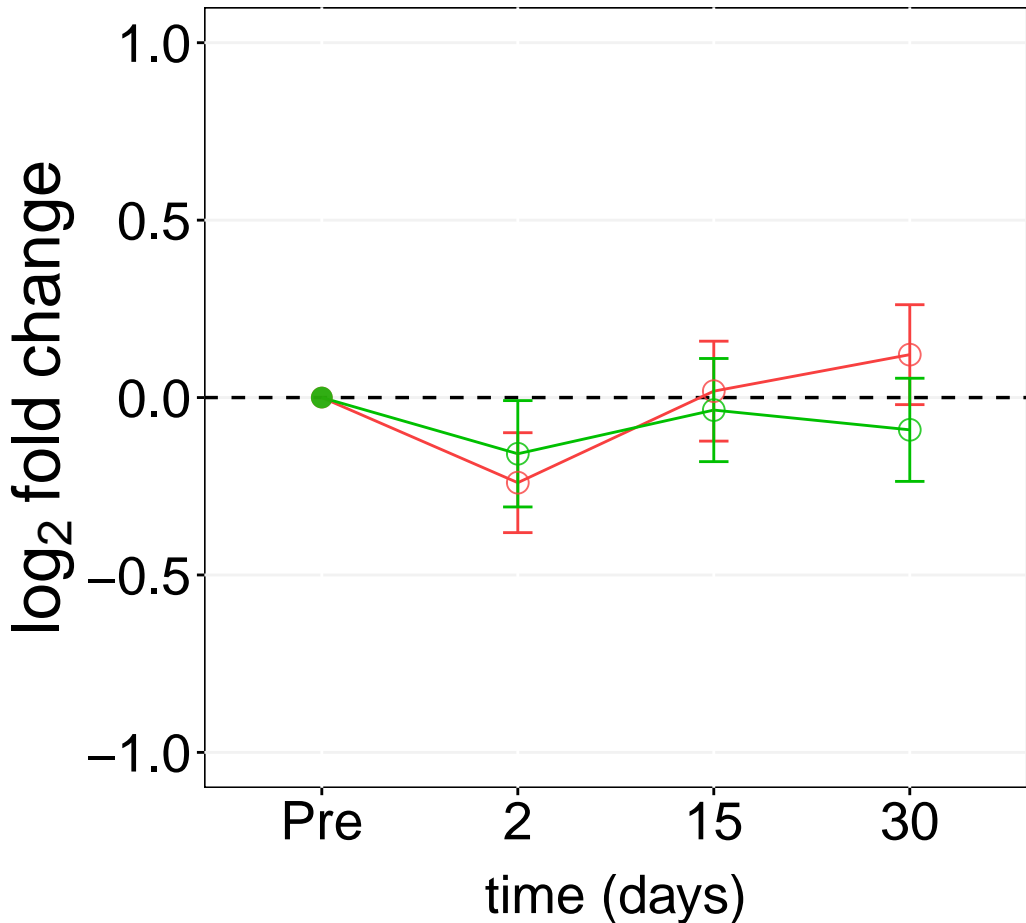

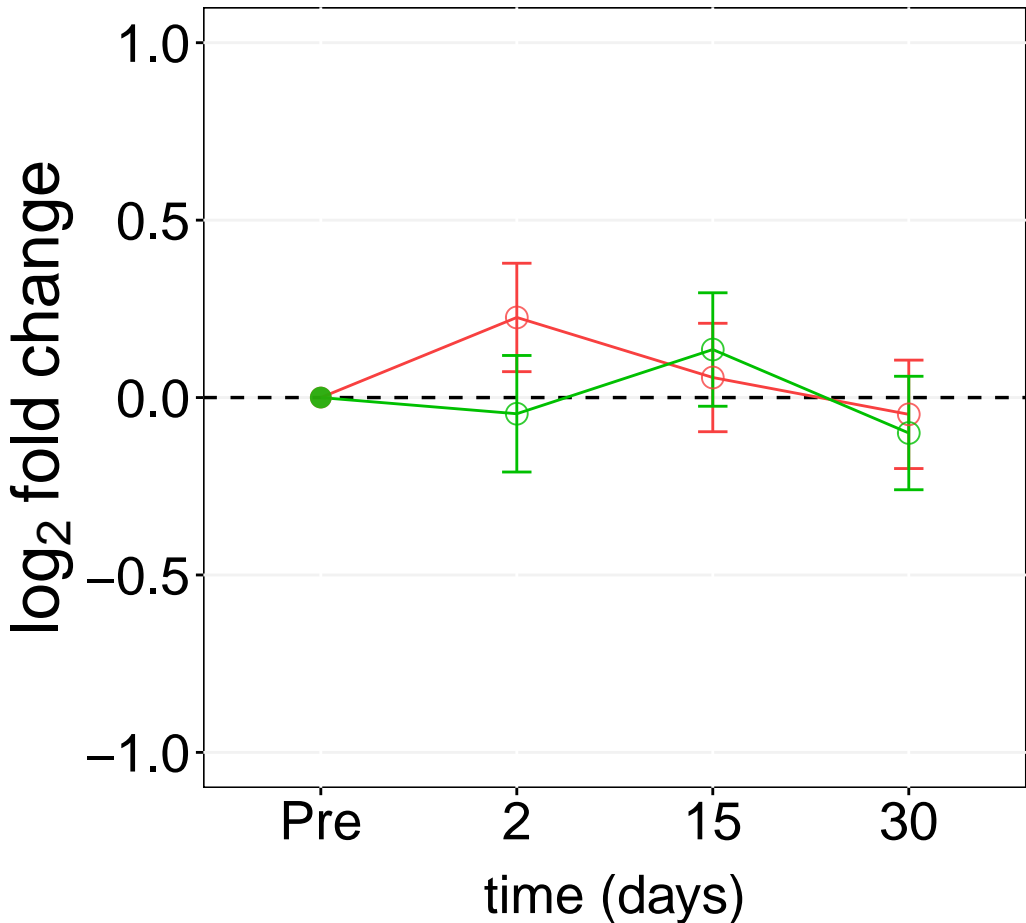

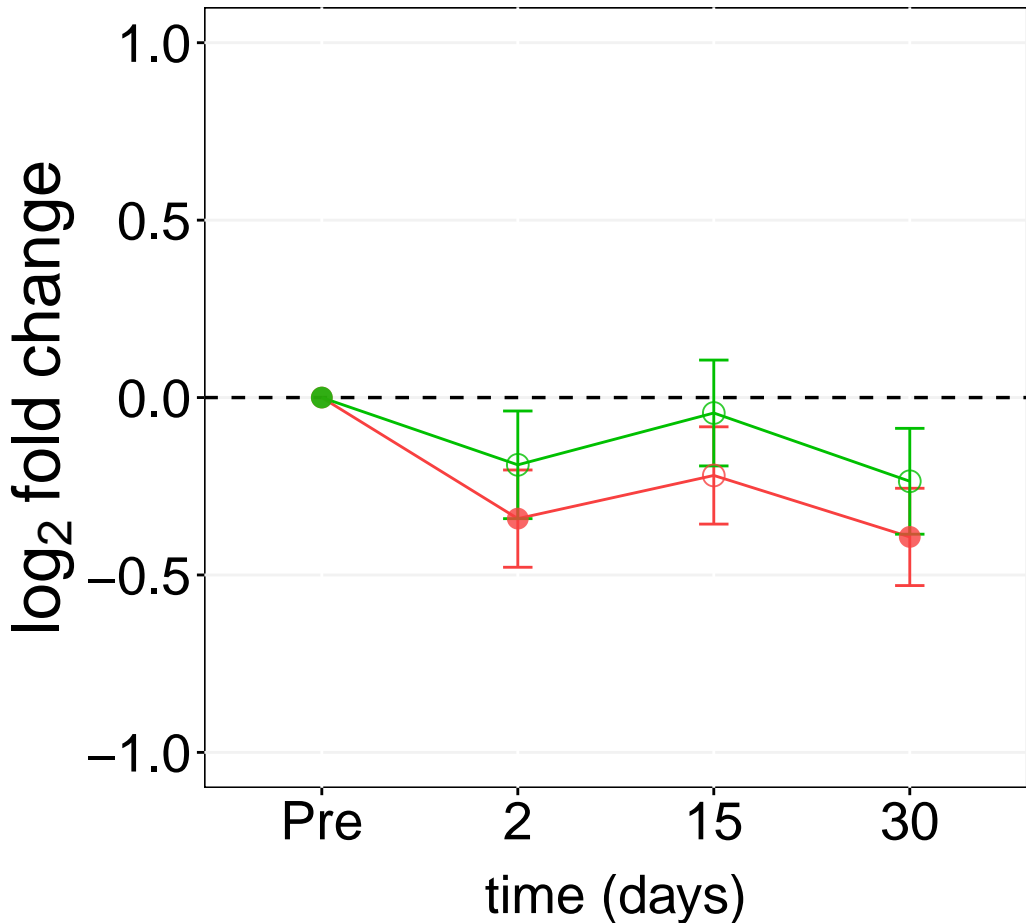

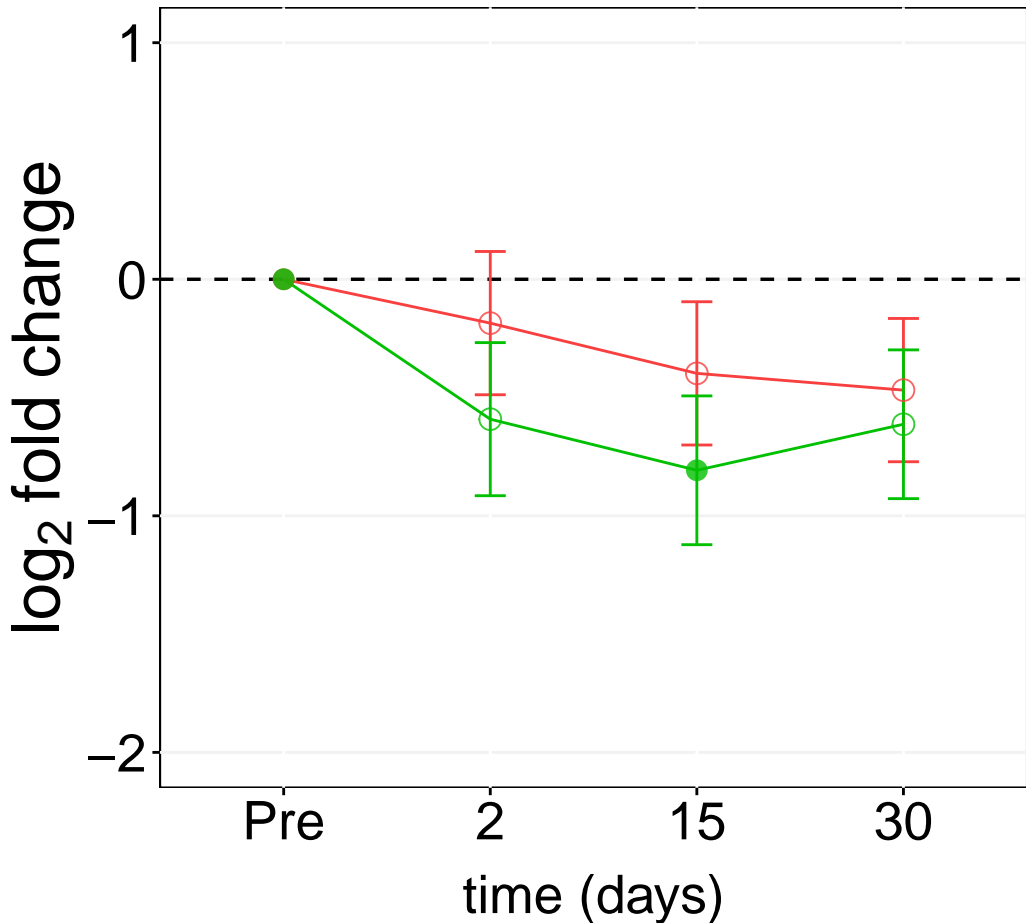

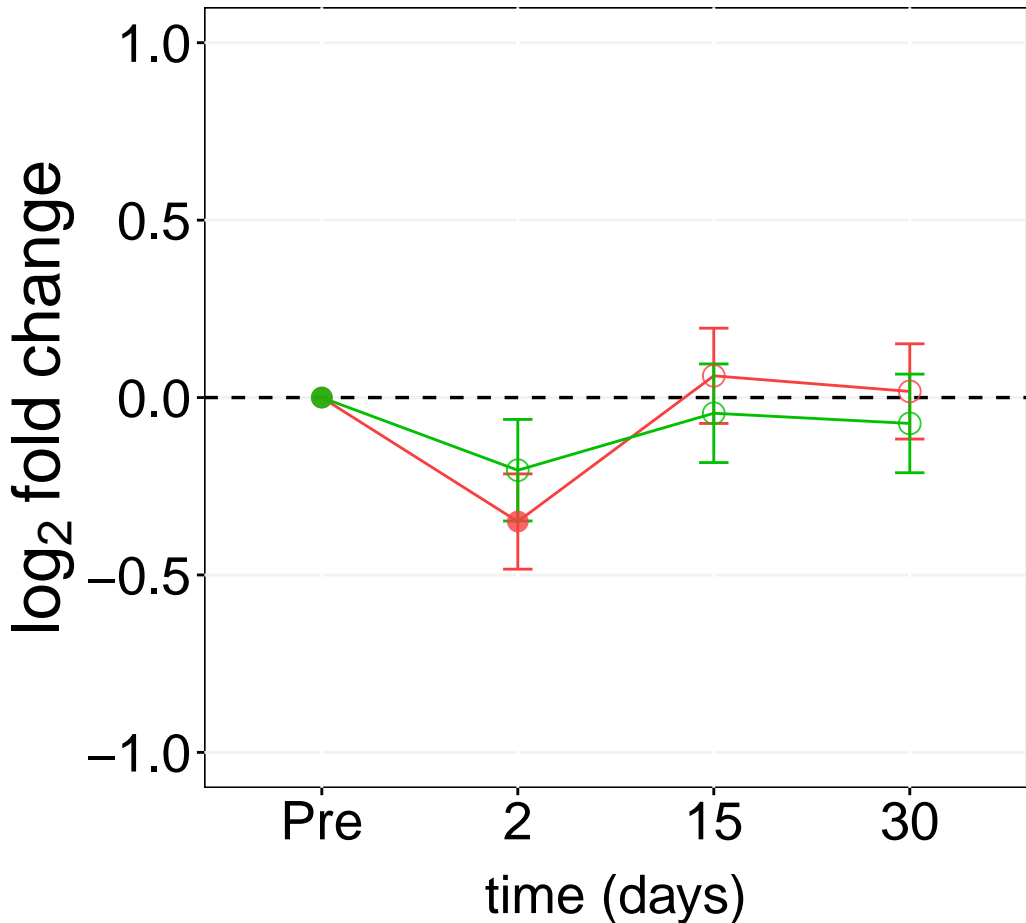

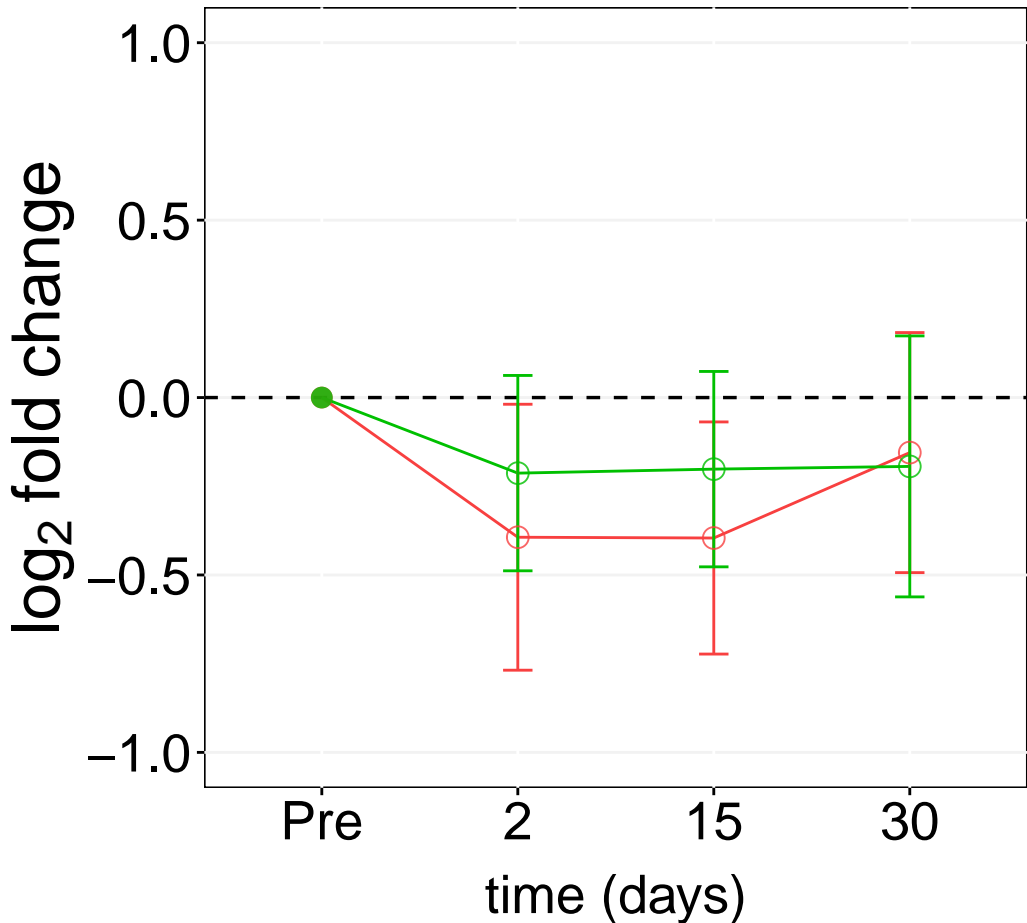

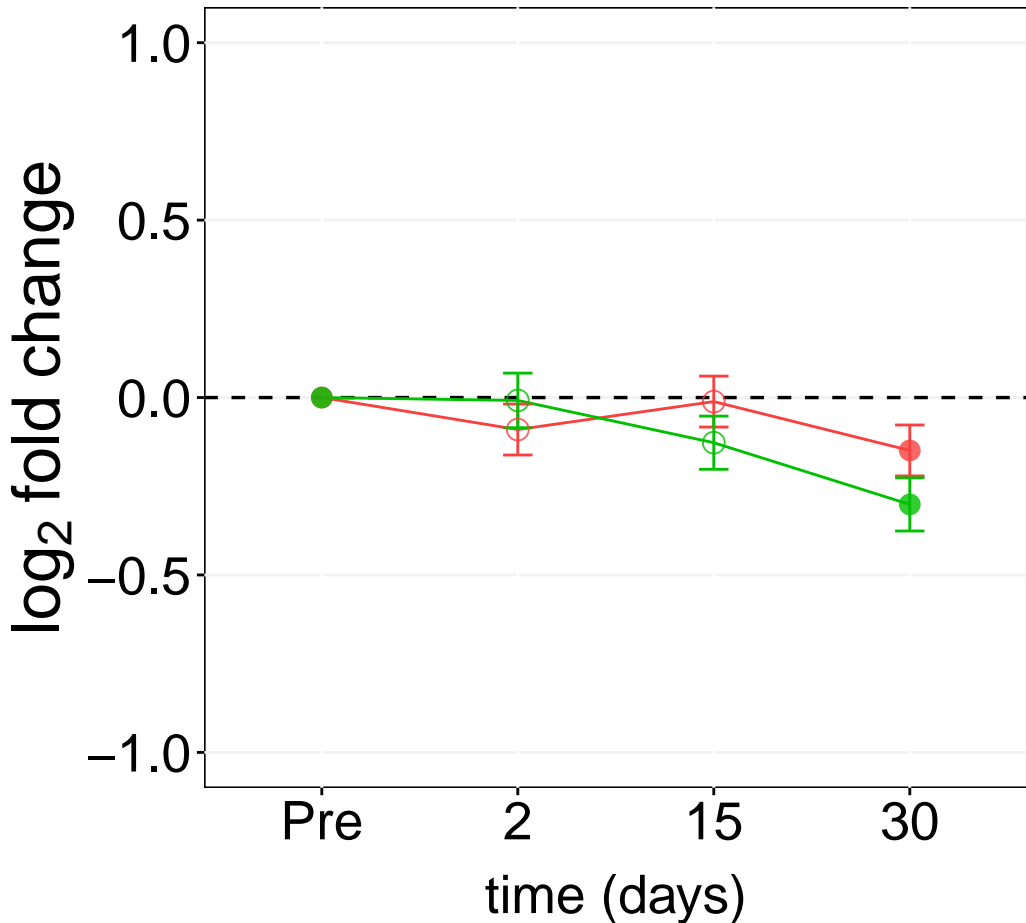



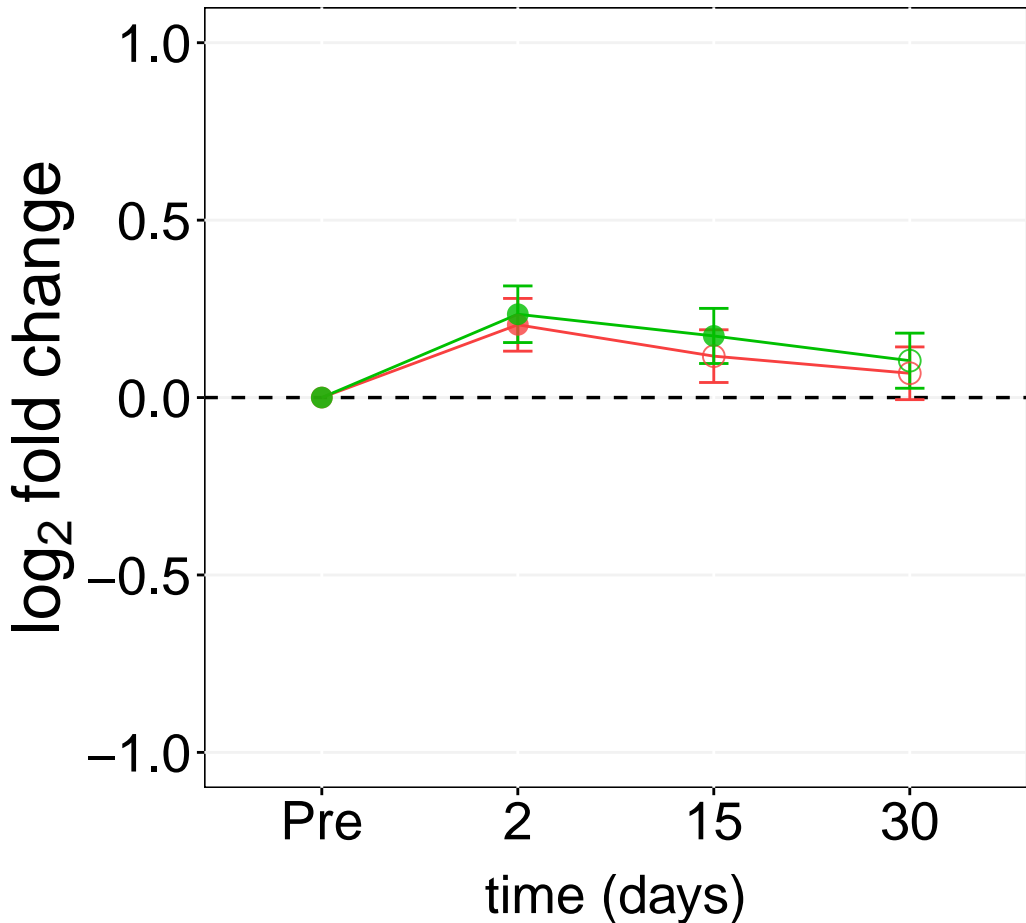

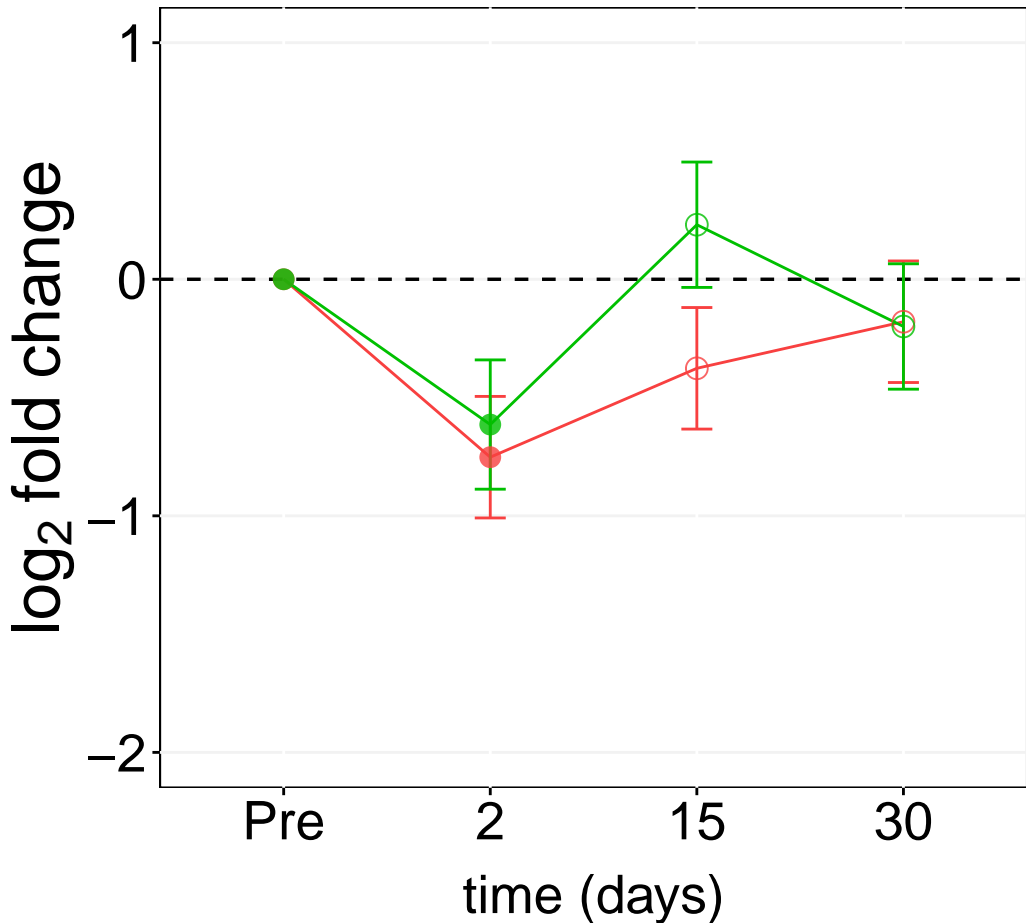

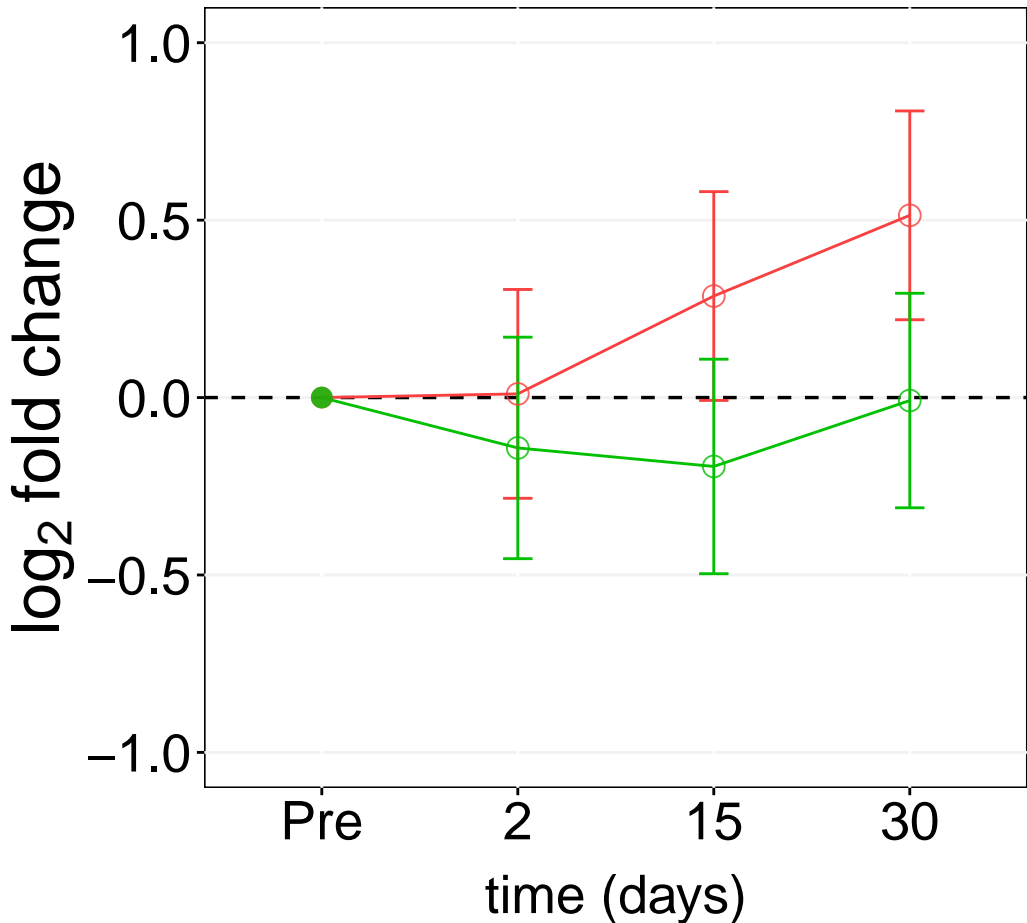

Supplement: 41419_2021_3651_MOESM6_ESM.pdf [file 41419_2021_3651_MOESM6_ESM.pdf]
