# Supplementary material for: Genetic inactivation of RIP1 kinase activity in rats protects against ischemic brain injury
Source: PubMed Central journal article supplement (PMC8026634; doi:10.1038/s41419-021-03651-6), 2021-04-07
Supplement: 41419_2021_3651_MOESM2_ESM.pdf [file 41419_2021_3651_MOESM2_ESM.pdf]

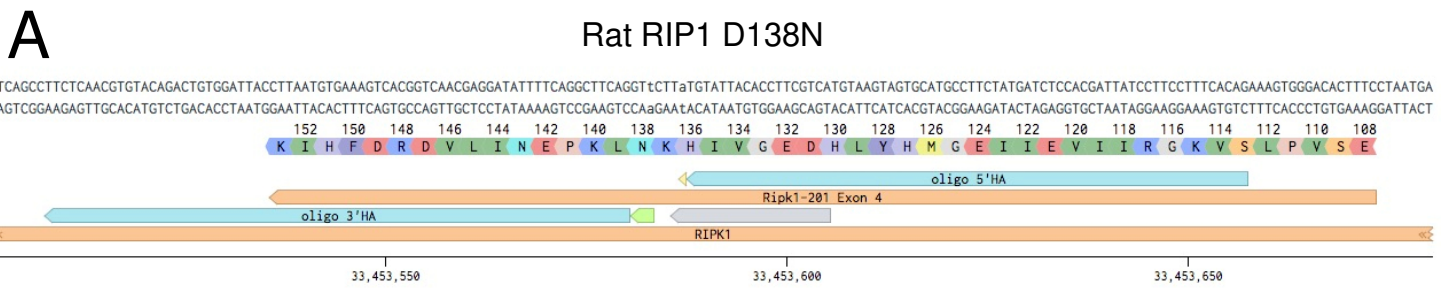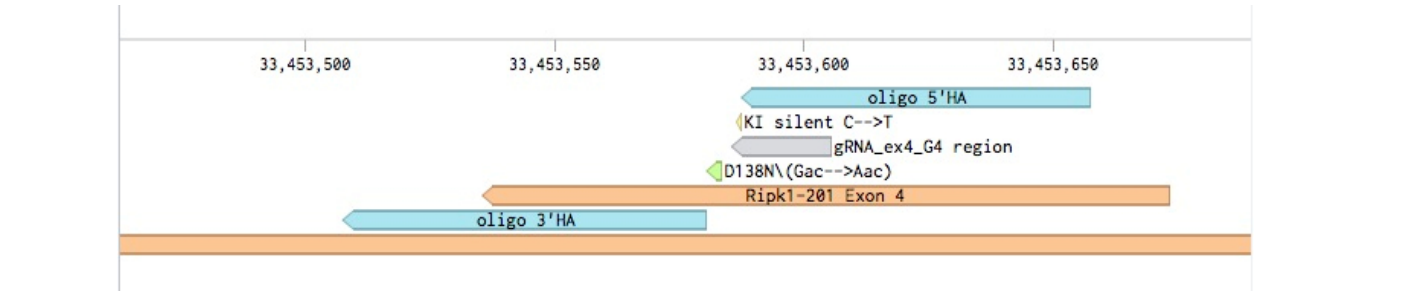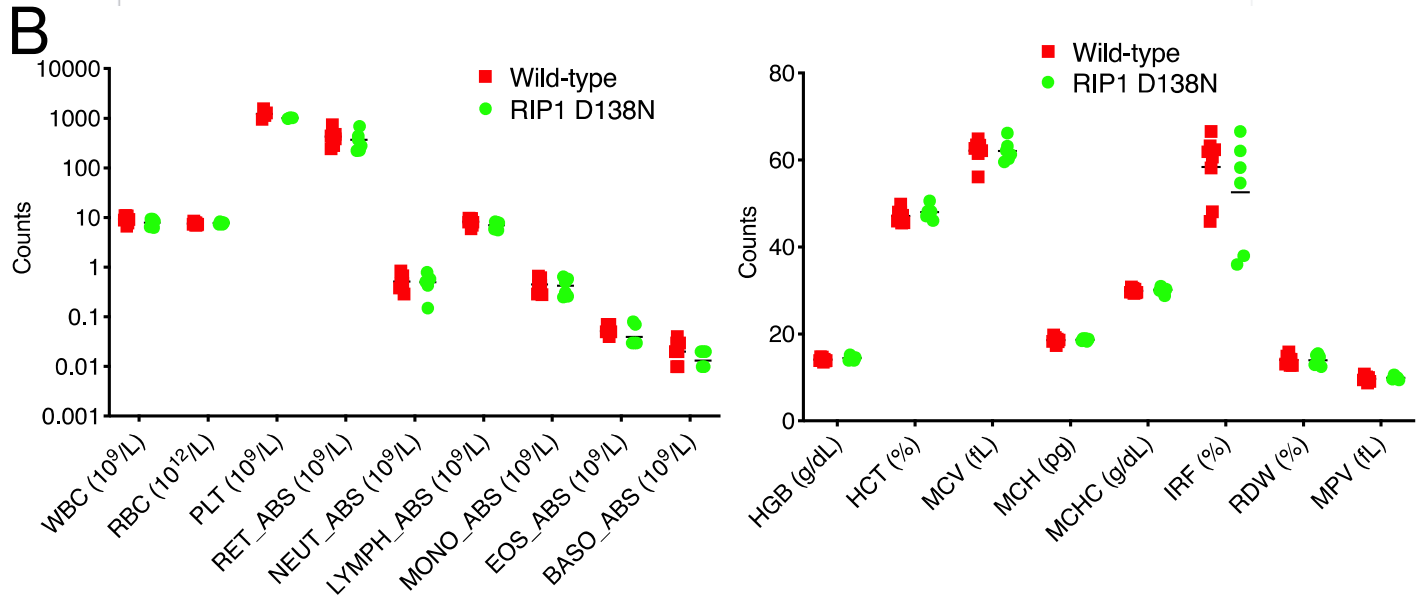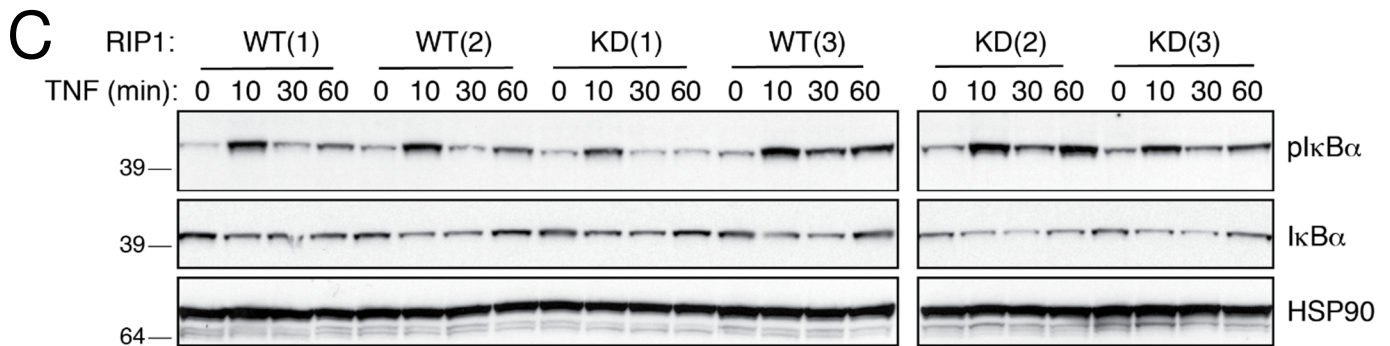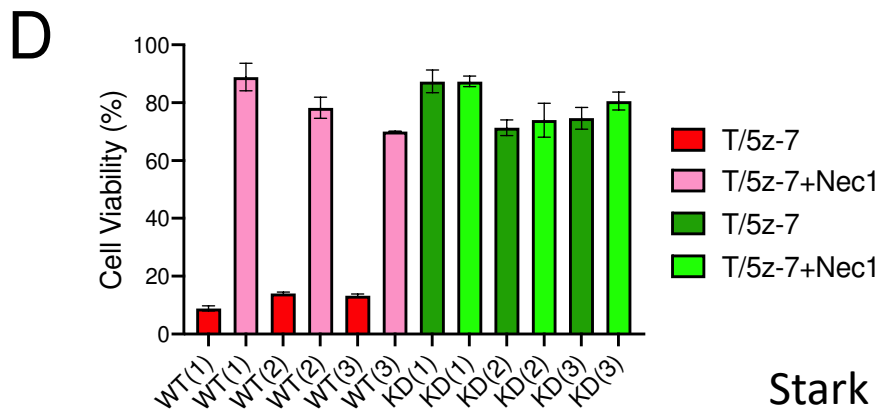

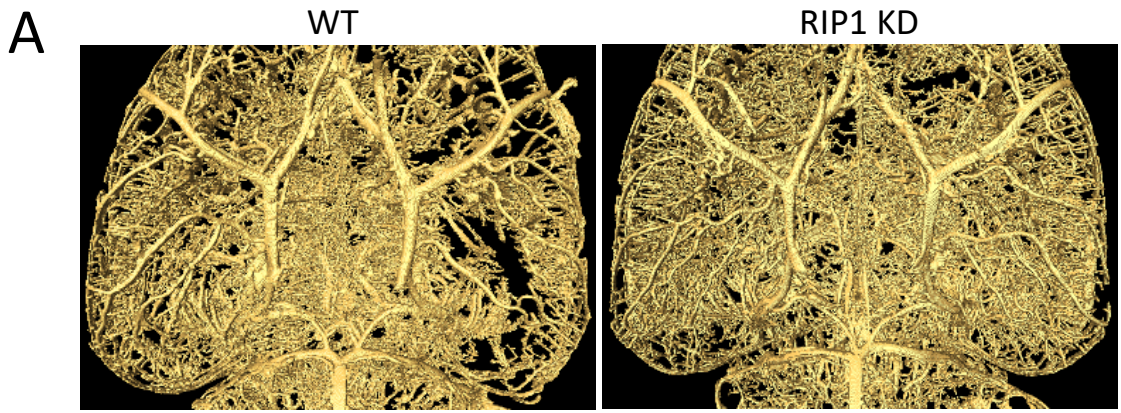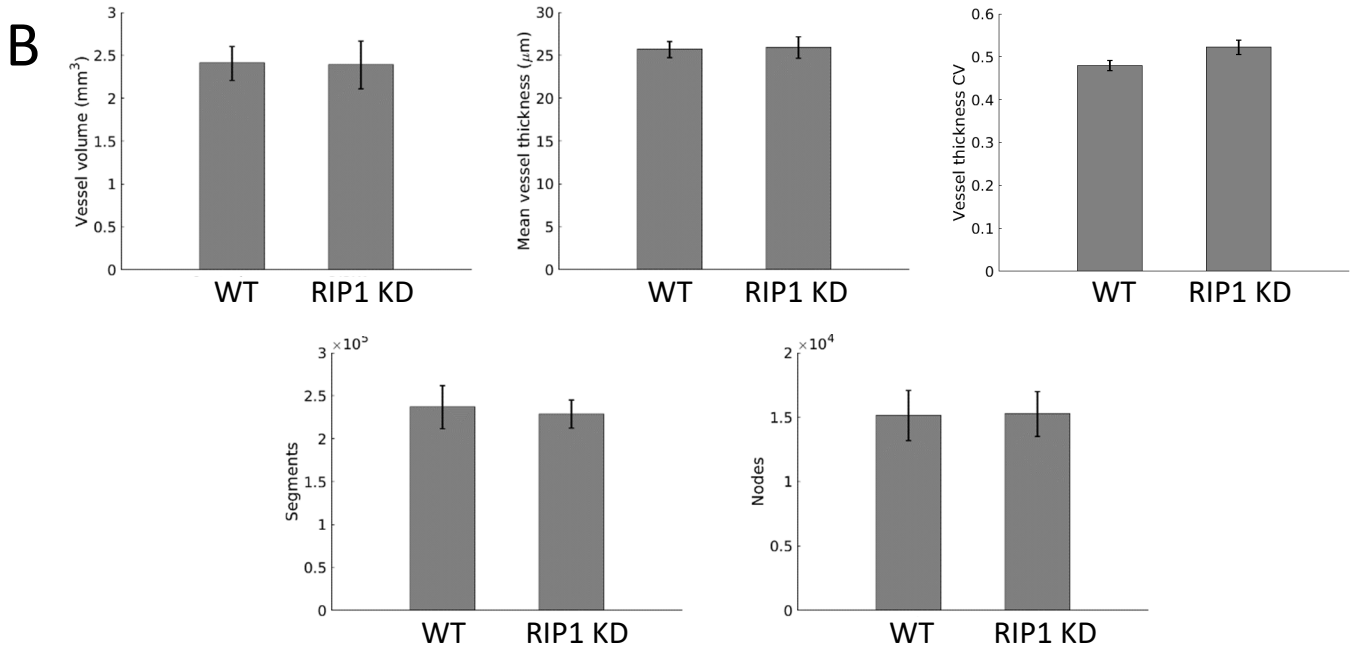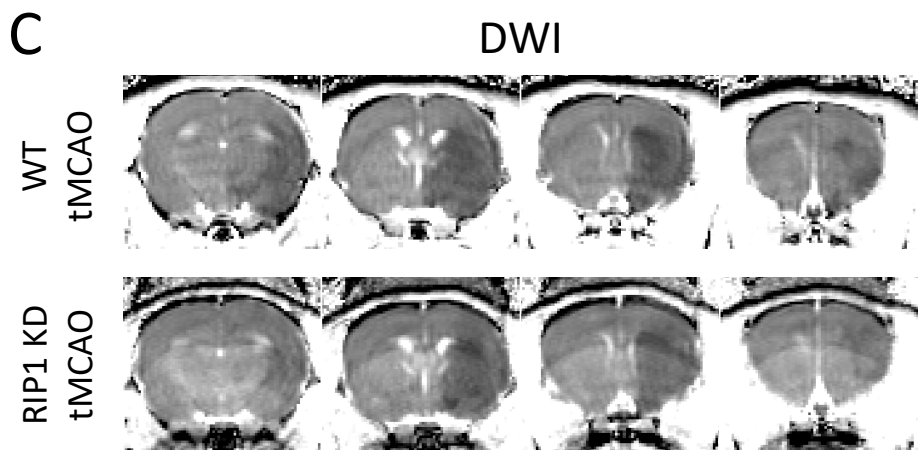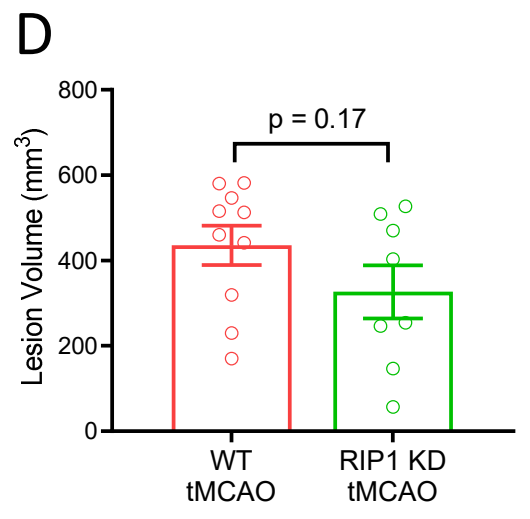

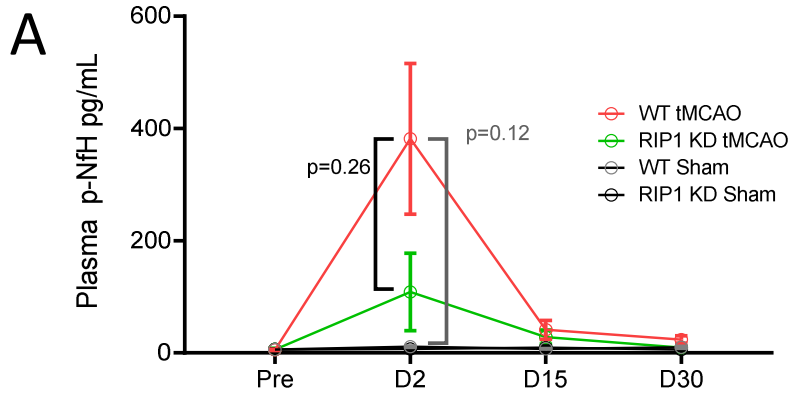

**B**

WT-tMCAO

Day 2 / pre

Day 15 / pre

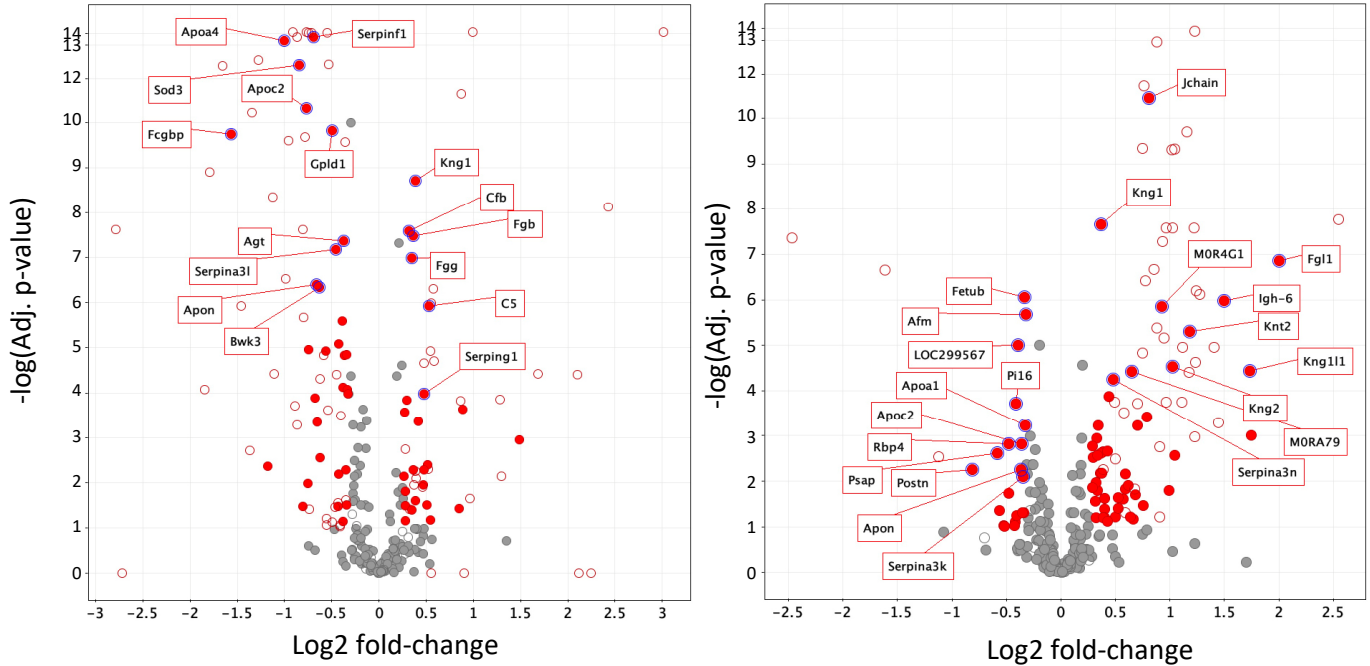

Day 30 / pre

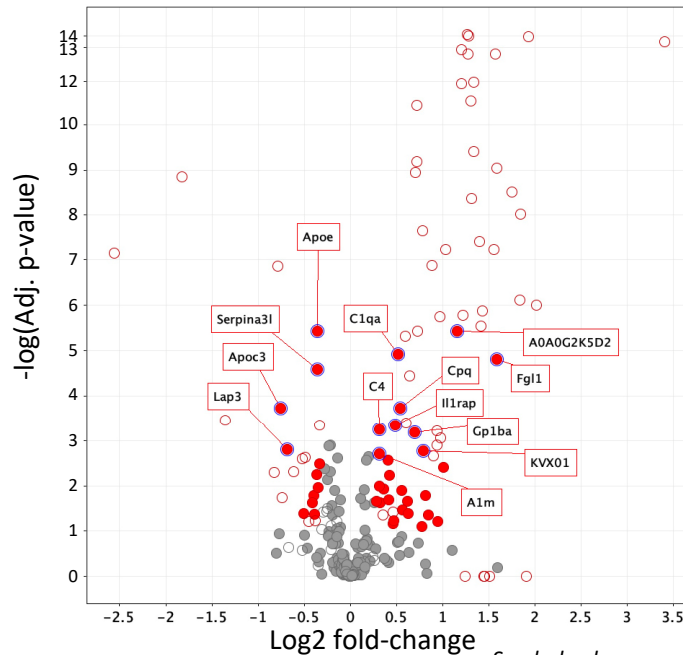

Symbol shade

- Significant change in WT upon Sham surgery
- No significant change in WT upon Sham surgery

Symbol color

- No significant change in WT upon tMCAO
- Significant change in WT upon tMCAO
